# Supplementary material for: Biochemical basis for the formation of organ-specific volatile blends in mint
Source: Front Plant Sci. 2023 Apr 14;14:1125065. doi: 10.3389/fpls.2023.1125065 (PMC10140540; doi:10.3389/fpls.2023.1125065)
Supplement: Supplementary Table 1 — Accession numbers and amino acid sequences of terpene synthases included in a phylogenetic analysis presented in Figure 4 . [file Table_1.xlsx]

## Sheet: Sheet1
Identifier	Uniprot Accession	Species	Amino Acid Sequence	DOI
	number
	(GenBank Accession Number
	if Uniprot Unavailable)
GTS_ORIVU	E2E2P0	Origanum vulgare	gamma-Terpinene synthase, chloroplastic OS=Origanum vulgare OX=39352 GN=TPS2 PE=1 SV=1	DOI: 10.1007/s11103-010-9636-1
			MATLSMQVSILSKEVKNVNNIGMRASKPMVARRVSTTRLRPICSASLQVEEETRRSGNYQ
			ASIWNNDYVQSFNTNQYKDEKHLKKKEELIAQVKILLNTKMEAVKQLELIEDLRNLGLTY
			YFQDEVKKILTSIYNDHKCFKNEQVGDLYFTSLGFRLLRLHGFDVSEEVFDFFKNEDGSD
			FKASLGENIKDVLQLYEASFLIREGEVILEQARVFSTKHLEKKVDEGINDEKLLAWIRHS
			LALPLHWRIQRLEARWFLDAYRARKDMIPLIFELGKIDFHIIQETQLEELQEVSKWWTNS
			NLAEKLPFVRDRIVECYFWALGLFEPHEYGYQRKMAAIIITFVTIIDDVYDVYGTLDELQ
			LFTDAIRKWDFQSISTLPYYMQVCYLALYTYASELAYDILKDQGFNSIAYLQRSWLSLVE
			GFFQEAKWYYAGYTPTLAEYLENAKVSISSPTIISQVYFTLPNSTERTVVENVFGYHNIL
			YLSGMILRLADDLGTTQFELKRGDVQKAIQCYMKDNNATEKEGAEHVKYLLREAWKEMNT
			AMADPECPLSEDLVDAAANLGRASQFIYLEGDGHGVQHSEIHNQMGGLIFEPYV
GTS4_THYCA	A0A068EN29	Thymus caespititius	gamma-Terpinene synthase OS=Thymus caespititius OX=751871 GN=TPS4 PE=2 SV=1	https://doi.org/10.1016/j.jplph.2014.04.001
			MEGSKPAATSVEESRRSGNYQPSLWDFNFIQSQPTHHYEEERNRKEDLIVHVKTLLGTKM
			EAIEQLDFIDDLRNLGLSYFFLDEIKNILSFIYSENKCFQNNQAGDLYFTSLGFRLLRQH
			GFNVSQEVFNRFKNDDGSDFKASLGEDTKGILQLYEASFLLREGEDTLELARQFSTKYLQ
			KKVDEKGIDDENVLSWIRHSLDLPLHWRIQRLEARWFLDAYAARKDMNPLILELGKIDFN
			IIQATMLDELKEVSRWWNNSCLAEKLPFVRDRIVECYFWALALFEPHQFGYQRKMAAIII
			TFVTVIDDVYDVYGTLDELQLFTDTVRRXDTESISQLPYYMQVCYLSLYTYVSELAYDIL
			KDKGFNSIPYLRRSWLSLIEGFFKEAQWYYSGYTPTLEEYLNNAKVSISSPTIISQVYFT
			LATSTEKVVXESVYGYHNILYLSGTILRLADDLGTTQFELKRGDVPKAVQCYMKDKNVTE
			KEAQEHVRYLIQEAWKEMNTAMAEPDCPFSEELVTAAANLGRASQFIYLEGDGHGVQHSE
			IHKQMGGLLFETYA
BPHS_LAVAN	E9N3U9	Lavandula angustifolia	beta-Phellandrene synthase OS=Lavandula angustifolia OX=39329 PE=2 SV=1	DOI: 10.1007/s00425-010-1332-5
			MSTIIAIQVLLPIPTTKTYPSHDLEKSSSRCRSSSTPRPRLCCSLQVSDPIPTGRRSGGY
			PPALWDFDTIQSLNTEYKGERHMRREEDLIGQVREMLVHEVEDPTPQLEFIDDLHKLGIS
			CHFENEILQILKSIYLNQNYKRDLYSTSLAFRLLRQYGFILPQEVFDCFKNEEGTDFKPS
			FGRDIKGLLQLYEASFLSRKGEETLQLAREFATKILQKEVDEREFATKMEFPSHWTVQMP
			NARPFIDAYRRRPDMNPVVLELAILDTNIVQAQFQEELKETSRWWESTGIVQELPFVRDR
			IVEGYFWTIGVTQRREHGYERIMTAKVIALVTCLDDIYDVYGTIEELQLFTSTIQRWDLE
			SMKQLPTYMQVSFLALHNFVTEVAYDTLKKKGYNSTPYLRKTWVDLVESYIKEATWYYNG
			YKPSMQEYLNNAWISVGSMAILNHLFFRFTNERMHKYRDMNRVSSNIVRLADDMGTSLAE
			VERGDVPKAIQCYMNETNASEEEAREYVRRVIQEEWEKLNTELMRDDDDDDDFTLSKYYC
			EVVANLTRMAQFIYQDGSDGFGMKDSKVNRLLKETLIERYE
BPS_ORIVU	E2E2P2	Origanum vulgare	beta-Phellandrene synthase OS=Origanum vulgare OX=39352 GN=TPS1 PE=1 SV=1	DOI: 10.1007/s11103-010-9636-1
			MSTISIHHVGILRNPLPSKNKRALINNPWSLSLPRSSSASRLVKPCRISSKTDTNPAEIT
			RRSANYEPSLWDFDYIQSLNGHQHYKKEKQLKREEELIVQVKMLLGTKMEAVKQLELIDD
			LKNLGLSYFFRDEIKKILTSIYNNSFENNNQVGDLYFTALGFRLLRQHGFNVSQRIFDCF
			KNEKGSHFDETLIGEDIKATLQLYETSFHLREGENTLELARQISTKYLQKMVDEGRINDE
			NLSSWIRHSLDLPLHWRIQRLEARWSLDAYAAREDKNPLIFELAKLDFNIIQATQQEELK
			EVSRWWNDSCLAEKLPFVRDRVVECYFWAVGLFDCHDYGFQRKITAAVNILITAIDDVYD
			VYGTLDELQLFTDVIRRWDTQSIDQLPYYMQLCYLMLYNFVSSLGYDILKDRGINTILHL
			HQSWVSVVEAYLKEAEWYESGYAPSLEEYLSIATISIGLIPIVIPLDLSIPNSTIHRHTR
			IDHRHEILNLSGMVLRLADDLGTASSELERGDVPKAIQCYMKDTNASEEEAREHVRFLIG
			EAWKELNTAMAEPDDHPFTEQGAGAAANIGRAAQFIYLEGDGHAHFQNHQHLENLFFHPYV
BOS_ORIVU	E2E2N3	Origanum vulgare	(E)-beta-Ocimene synthase, chloroplastic OS=Origanum vulgare OX=39352 GN=TPS7 PE=1 SV=1	DOI: 10.1007/s11103-010-9636-1
TPS7			MSTISINLMSIIRNPLHSKSKRALINKHPSSSASRLVQPCRISSKIDTKPAEITRRSGNY
			EPSLWDFDYLQSLNTHHHYKKEEQLKREEELIVQVKMLLGTKMEAVEQLELIDDLKNLGL
			SYFFRDEIKKILTSIYNNSFENNNKVGDLYFTALGFRLLRQHGFNVSQRIFDCFKNEKGS
			HFDETLIGEDIKATLQLYEASFHLREGENTLELARQISTKYLQKMVDEGRINDENLSSWI
			RHSLDLPLHWRIQRLEARWFLDAYAVREDKNPLIFELAKLDFNIIQATQQEELKEVSRWW
			NDSCLAEKLPFLRDRIVEAYFWGVALFELLEFGYQRKITAIIIILVTAIDDVYDVYGTLD
			ELQLFTDVIRRWNTQSIDQLPYYMQLCYMTLYNYVSNLGYEILKDRGINTIPHIHQSWVS
			LVEAFLKEEEWYESGYTPSLKEYLNNASISVGAIAVVIALELSIPNSTIHHRTRIDHRHK
			ILHLSGLVSRLANDLGTAQHEMEKGNVPTAIQCYMKDTNASEEEAWEHVRFMIGEAWKRL
			NTAMAEADDCPFTEQAVEAAANFGRAAQFIYREGDGHGHFQIHQHVENLFFHPYV
SBH6_THYVU	L0HAM7	Thymus vulgaris	Sabinene hydrate synthase, chloroplastic OS=Thymus vulgaris OX=49992 GN=TPS6 PE=1 SV=1	DOI: 10.1016/j.abb.2012.12.003
TPS6			MSTISINHVGLLRNPLHGKSKRASINKSWSLCLPRSSSASRLVKPCRVSSKTDTKPAEMT
			RRSGNYEPSLWDFDFIQSLDNHHPHVKEKQLKREEELIVEVKMLLGTKIEAVKQLELIDD
			LKNLGLSYFFRDEIKMVLTSIYNNFFENKNNQVGDLYFTALGFRLLRQHGFNVSQEIFDC
			FKNEKGSDFDETLIGEDTKATLQLYEASFHLREGENTLELARQISTKYLQKKVDEGSIND
			ENLSSWIRHSLDLPLHWRIQRLEARWFLDAYAAREDKNPLIFELTKLDFNIIQATQQEEL
			KEVSRWWNNSRLAEKLPFVRDRVVECYFWAVGLFDGHDYGFQRKVNAAVNILITAIDDVY
			DVYGTLDELRLFTDVIRRWDTQSIDQLPYYMQLCYLTLYNYVSDLAYNILKDRGINTIPH
			LHQSWVNTVEAYLKEAEWYESGYAPSLEEYLSIASISIGVIPIVIPLEVSIPNSTFHRRS
			PFEYHRYDILHLSAMVLRLADDLGTAQYEVETGDVPKAVQCYIKDTNASEEEAREHVRFM
			IGEVWKELNTAMAESDDCPFTEQGAWAAVNIGRAAQFIYLEGDGHGRFQIHQHMENLFFHPCV
SBH7_THYVU	L0HB77	Thymus vulgaris	(E)-Sabinene hydrate synthase, chloroplastic OS=Thymus vulgaris OX=49992 GN=TPS7 PE=1 SV=1	DOI: 10.1016/j.abb.2012.12.003
			MSTISINHVGILRNPLQCKNKRTSINKPWSLSLPRSSPASRLVKPCRVSSKVDTMPDEIT
			RRSGNYEPSLWDLDFIQSLDNHHPYVKEMQLKREEELIVQVKMLLGTKMEAVKQLELIDD
			LKNLGLSYFFRDEIKTILTSIYNNSFENNNQVGDLYFTALGFRLLRQHGFNVSQQIFDCF
			KDNDFDETLIGEDTKGILQLYEASFHLREGENTLELARQISTKYLQKKVDEGSINDENLS
			SWIRHSLDLPLHWRIQRLEARCFLDAYAAREDKNPLIFKLAELDFNIIQATQQQELKEIS
			RWWNDSSLAEKLPFVRDRVVECYFWAVGLFEGHEFGFQRKITAAIIILITAIDDVYDVYG
			TLDELQLFTDVIRRWDTQSIDQLPYYMQLCYLALYNFVSDLAYDILKDRGLNTIPYLHRS
			WVELVEAYLKEAGWYENGYTPSLEEYLTNATISIGVPPIVLPVEVSLPNSTIHRTQFDRP
			HKILDLSARVLRLADDLGTASSELERGDVPKAIQCYMKDNNASEEEAREHVRFMIREAWK
			ELNTAMAEPDNCPFTEQTVEAAANLGRAAQFIYLEGDGHAHFQIHQHLENLFFHPCV
CINS_SALOF	O81191	Salvia officinalis	1,8-Cineole synthase, chloroplastic OS=Salvia officinalis OX=38868 PE=1 SV=1
			MSSLIMQVVIPKPAKIFHNNLFSVISKRHRFSTTITTRGGRWAHCSLQMGNEIQTGRRTG	DOI: 10.1074/jbc.273.24.14891
			GYQPTLWDFSTIQLFDSEYKEEKHLMRAAGMIAQVNMLLQEEVDSIQRLELIDDLRRLGI
			SCHFDREIVEILNSKYYTNNEIDESDLYSTALRFKLLRQYDFSVSQEVFDCFKNDKGTDF
			KPSLVDDTRGLLQLYEASFLSAQGEETLHLARDFATKFLHKRVLVDKDINLLSSIERALE
			LPTHWRVQMPNARSFIDAYKRRPDMNPTVLELAKLDFNMVQAQFQQELKEASRWWNSTGL
			VHELPFVRDRIVECYYWTTGVVERREHGYERIMLTKINALVTTIDDVFDIYGTLEELQLF
			TTAIQRWDIESMKQLPPYMQICYLALFNFVNEMAYDTLRDKGFNSTPYLRKAWVDLVESY
			LIEAKWYYMGHKPSLEEYMKNSWISIGGIPILSHLFFRLTDSIEEEDAESMHKYHDIVRA
			SCTILRLADDMGTSLDEVERGDVPKSVQCYMNEKNASEEEAREHVRSLIDQTWKMMNKEM
			MTSSFSKYFVQVSANLARMAQWIYQHESDGFGMQHSLVNKMLRGLLFDRYE
BPPS_SALOF	O81192	Salvia officinalis	(+)-Bornyl diphosphate synthase, chloroplastic OS=Salvia officinalis OX=38868 PE=1 SV=1	DOI: 10.1074/jbc.273.24.14891
			MSIISMNVSILSKPLNCLHNLERRPSKALLVPCTAPTARLRASCSSKLQEAHQIRRSGNY
			QPALWDSNYIQSLNTPYTEERHLDRKAELIVQVRILLKEKMEPVQQLELIHDLKYLGLSD
			FFQDEIKEILGVIYNEHKCFHNNEVEKMDLYFTALGFRLLRQHGFNISQDVFNCFKNEKG
			IDFKASLAQDTKGMLQLYEASFLLRKGEDTLELAREFATKCLQKKLDEGGNEIDENLLLW
			IRHSLDLPLHWRIQSVEARWFIDAYARRPDMNPLIFELAKLNFNIIQATHQQELKDLSRW
			WSRLCFPEKLPFVRDRLVESFFWAVGMFEPHQHGYQRKMAATIIVLATVIDDIYDVYGTL
			DELELFTDTFKRWDTESITRLPYYMQLCYWGVHNYISDAAYDILKEHGFFCLQYLRKSVV
			DLVEAYFHEAKWYHSGYTPSLDEYLNIAKISVASPAIISPTYFTFANASHDTAVIDSLYQ
			YHDILCLAGIILRLPDDLGTSYFELARGDVPKTIQCYMKETNASEEEAVEHVKFLIREAW
			KDMNTAIAAGYPFPDGMVAGAANIGRVAQFIYLHGDGFGVQHSKTYEHIAGLLFEPYA
SABS_SALOF	O81193	Salvia officinalis	(+)-Sabinene synthase, chloroplastic OS=Salvia officinalis OX=38868 PE=1 SV=1	DOI: 10.1074/jbc.273.24.14891
			MSSISINIAMPLNSLHNFERKPSKAWSTSCTAPAARLRASSSLQQEKPHQIRRSGDYQPS
			LWDFNYIQSLNTPYKEQRHFNRQAELIMQVRMLLKVKMEAIQQLELIDDLQYLGLSYFFQ
			DEIKQILSSIHNEPRYFHNNDLYFTALGFRILRQHGFNVSEDVFDCFKIEKCSDFNANLA
			QDTKGMLQLYEASFLLREGEDTLELARRFSTRSLREKFDEGGDEIDEDLSSWIRHSLDLP
			LHWRVQGLEARWFLDAYARRPDMNPLIFKLAKLNFNIVQATYQEELKDISRWWNSSCLAE
			KLPFVRDRIVECFFWAIAAFEPHQYSYQRKMAAVIITFITIIDDVYDVYGTIEELELLTD
			MIRRWDNKSISQLPYYMQVCYLALYNFVSERAYDILKDQHFNSIPYLQRSWVSLVEGYLK
			EAYWYYNGYKPSLEEYLNNAKISISAPTIISQLYFTLANSIDETAIESLYQYHNILYLSG
			TILRLADDLGTSQHELERGDVPKAIQCYMNDTNASEREAVEHVKFLIREAWKEMNTVTTA
			SDCPFTDDLVAAAANLARAAQFIYLDGDGHGVQHSEIHQQMGGLLFQPYV
CINS_THYAL	ASM47190	Thymus albicans	1,8-Cineole synthase (Fragment) OS=Thymus albicans OX=2021219 PE=2 SV=1	https://doi.org/10.1016/j.jplph.2017.07.013
			TDEASSTRRSGNYKPTFWNFDRIQSLNSVYKEERYVRRAADLIRQVKMLLHEKSDDDVLP
			QLELIDDSRGLAISCHFDEKIERILNHLFHHDDVKEGNLYSTSLTFKLLKQHGFNISQGL
			FEHFKCENGTDFKPIHVENTKGLLQLYEASFLSTRGEETLELATQFARKSLQEKLLDHHE
			IDNQYILSSIRDALEIPSHWRVRTPYAISFIDAYKERPLMNPTVLELAILDINIIQAQFQ
			EELKEASRWWNGTGLVQQLPFVRDRIVECYFWTTGVLERRQHVYERIMLTKINALVTTID
			DIYDVYGTIGELRLFTDAVQRWDIDSINELPPYMQLCYLALYNFVNEEAYHTLKDRGFNS
			IPFLRKTWIDLVETYMREAEWYHNGHNPSLGEYMENAWISIGGVPILSHLFFRLTDSIDD
			ETVERMHEYHNIVRGSCTILRLADDLGTSLDEVKRGDVPKSVQCYMNEKNASEEEAREYV
			RSLIEETWRTMNTELMASADSPFSKYFVEAAANLGRMAQCVYQHESDGFGMQHSRVNTML
			RSLLFDPYAYDTVAVSSLPEESMQPQQTMQRGRRGEVVSYDTSEGEGVVHEVGERASRPN
CINS_LAVAN	I3WEW0	Lavandula angustifolia	1,8-Cineole synthase OS=Lavandula angustifolia OX=39329 PE=2 SV=1	DOI: 10.1007/s11103-012-9920-3
			MSTIIAIQALLPIPTTKTYLSHGLDKYSSRCPSSSTPRPRLRCSLQVSDPIQTGRRSGGY
			PPALWDFDTIQSLNTEYKGERHMRREEDLIGQVREMLVHEEVDLTPQLELIDDLHKLGIS
			CHFENEILQILKSIYLNQNYKRDLYSTSLAFRLLRQNGFILPQEVFDCFKNEKGTDFKPS
			LSHDRKGLLQLYEASFLSRQGEETLQLAREFATKILQKEVDERDFETKMGFPSHWRVQMP
			NARLHIDAYRKRTDMNPVVLELAILDTNIVQAQFQEELKETSRWWESTSLVQELPFVRDR
			IVECYLWTTGVIQRREHGYERIMLTKINALVTTIDEVFDIYGTLEELQLFTTTIQRWDLE
			SMKQLPPYMQLCYLALHKFVIEEAYETLKEKGFNSIPYVTKWWVNLVESYMKEATWYYNG
			YKPSMQEYINNAWISIGGLPILSHLFFRFTDSIESMDKYRDMDRASCTILRLADDMGTSL
			VEVERGDVPKAIQCYMNETNASEEEAREYVRRLIEKEWEKMNTETMWDDDDDDFTLSKHY
			CEVVANLARMAQFIYQDGLDGFGMKDSKVNKLLKELLFERYE
CINS_LAVIN	I3WEV8	Lavandula x intermedia	1,8-Cineole synthase OS=Lavandula x intermedia OX=1196215 PE=2 SV=1	DOI: 10.1007/s11103-012-9920-3
			MSTIIAIQALLPIPTTKTYLSHGLDKYSSRCPSSSTPRPRLRCSLQVSDPIQTGRRSGGY
			PPALWDFDTIQSLNTEYKGERHMRREEDLIGQVREMLVHEEVDLTPQLELIDDLHKLGIS
			CHFENEILQILKSIYLNQNYKRDLYSTSLAFRLLRQNGFILPQEVFDCFKNEKGTDFKPS
			LSHDRKGLLQLYEASFLSRQGEETLQLAREFATKILQKEVDERDFETKMGFPSHWRVQMP
			NARLHIDAYRKRTDMNPVVLELAILDTNIVQAQFQEELKETSRWWESTSLVQELPFVRDR
			IVECYLWTTGVIQRREHGYERIMLTKINALVTTIDDVFDIYGTLEELQLFTTTIQRWDLE
			SMKQLPPYMQLCYLALHKFVIEEAYETLKEKGFNSIPYVTKWWVNLVESYMKEATWYYNG
			YKPSMQEYINNAWISIGGLPILSHLFFRFTDSIESMDKYRDMDRASCTILRLADDMGTSL
			VEVERGDVPKAIQCYMNETNASEEEAREYVRRLIEKEWEKMNTETMWDDDDDDFTLSKYY
			CEVVANLARMAQFIYQDGLDGFGMKDSKVNKLLKELLFERYE
CINS_LAVLA	I3WEV9	Lavandula latifolia	>tr|I3WEV9|I3WEV9_9LAMI 1,8-cineole synthase OS=Lavandula latifolia OX=39331 PE=2 SV=1	DOI: 10.1007/s11103-012-9920-3
			MSTIIAIQALLPIPTTKTYLSHGLDKYSSRCPSSSTPRPRLRCSLQVSDPIQTGRRSGGY
			PPALWDFDTIQSLNTEYKGERHMRREEDLIGQVREMLVHEEVDLTPQLELIDDLHKLGIS
			CHFENEILQILKSIYLNQNYKRDLYSTSLAFRLLRQNGFILPQEVFDCFKNEKGTDFKPS
			LSHDRKGLLQLYEASFLSRQGEETLQLAREFATKILQKEVDERDFETKMGFPSHWRVQMP
			NARLHIDAYRKRTDMNPVVLELAILDTNIVQAQFQEELKETSRWWESTSLVQELPFVRDR
			IVECYLWTTGVIQRREHGYERIMLTKINALVTTIDDVFDIYGTLEELQLFTTTIQRWDLE
			SMKQLPPYMQLCYLALHKFVIEEAYETLKEKGFNSIPYVTKWWVNLVESYMKEATWYYNG
			YKPSMQEYINNAWISIGGLPILSHLFFRFTDSIESMDKYRDMDRASCTILRLADDMGTSL
			VEVERGDVPKAIQCYMNETNASEEEAREYVRRLIEKEWEKMNTETMWDDDDDDFTLSKYY
			CEVVANLARMAQFIYQDGLDGFGMKDSKVNKLLKELLFERYE
SABS_SALPO	A6XH06	Salvia Pomifera	>sp|A6XH06|SABS1_SALPM Sabinene synthase 1, chloroplastic (Fragment) OS=Salvia pomifera OX=396869 GN=SabS1 PE=1 SV=1
			MPLNSLHNLERKPSKAWSTSCTAPAARLQASFSLQQEEPRQIRRSGDYQPSLWDFNYIQS	DOI: 10.1105/tpc.106.047779
			LNTPYKEQRYVNRQAELIMQVRMLLKVKMEAIQQLELIDDLQYLGLSYFFPDEIKQILSS
			IHNEHRYFHNNDLYLTALGFRILRQHGFNVSEDVFDCFKTEKCSDFNANLAQDTKGMLQL
			YEASFLLREGEDTLELARRFSTRSLREKLDEDGDEIDEDLSSWIRHSLDLPLHWRIQGLE
			ARWFLDAYARRPDMNPLIFKLAKLNFNIVQATYQEELKDVSRWWNSSCLAEKLPFVRDRI
			VECFFWAIGAFEPHQYSYQRKMAAIIITFVTIIDDVYDVYGTLEELELFTDMIRRWDNIS
			ISQLPYYMQVCYLALYNFVSERAYDILKDQHFNSIPYLQRSWVSLVEGYLKEAYWYYNGY
			KPSLEEYLNNAKISISAPTIISQLYFTLANSTDETVIESLYEYHNILYLSGTILRLADDL
			GTSQHELERGDVPKAIQCYMKDTNASEREAVEHVKFLIRETWKEMNTVTTASDCPFTDDL
			VAVATNLARAAQFIYLDGDGHGVQHSEIHQQMGGLLFQPYV
BPPS_PHYDU	A0A2H4RGI6	Phyla Dulcis	>tr|A0A2H4RGI6|A0A2H4RGI6_PHYDL Bornyl diphosphate synthase OS=Phyla dulcis OX=542674 PE=2 SV=1	DOI: 10.1016/j.bbrc.2017.06.147
			MAAFNIIMRFALPTNYKPKYSLCGFVPNKTTKVTCSSVHSNAKTSDEVIKPGDEVSRGRR
			SGNYEPPIWNFNYVQSSSSQYTAGRRSGNYEANMWDFDYIQSSSSQFTEDRYLERASELV
			VQVKKLLEEELTEPIQQLELIDDLQNMGVSYHFEDEIKQILKSMYDDRVKKYNSKDSKNV
			RDLYSTALEFRLSRQHGFTISQEVFDCFKNNKGGFEASLAEDTRGLLQLYEASFMLMEGE
			ETLEQAKEFATSFLLKKLEDDTKHGILVDENLSLSVFHALELPIHWRTQRHNARWFIDAY
			EKRSNRNSVVLELAKVDFNIVQATYQQEIKHISRWWEQTRLAEKLPFARDRLVENFLWTV
			GWLREPQYGYARIMCTKLFIFITYVDDIFDVYGTLEELQLFRDVIRRWDIEAMGQLPNYM
			QMCFLAIDNFINEMAYDVLKEQEFVIIPHLRKMWADLCTSYCQEAEWYYNKYMPTMDEYI
			NNACISISTPLILSNTYFVVTNPIEEEVVQNFYKNPDVVRYSAMILRLADDLGTSEFEAE
			RGDVPKAIECYMNESGASREEAREHVKFMIWEAWKKINKELLSNASFPQFFLRNAADLGR
			AGQFMYQHGDGFGVNPHHHKEDVSTLFFEPL
BPPS_LAVAN	A0A185NWC6	Lavandula angustifolia subsp. angustifolia	>tr|A0A185NWC6|A0A185NWC6_LAVAN Bornyl diphosphate synthase OS=Lavandula angustifolia subsp. angustifolia OX=1211581 PE=2 SV=1	https://doi.org/10.1016/j.phytochem.2017.01.015
			MTAARSFMAINSNMTTDHLHKFGKKNLEFGQGYSCNNASPMRLRPCCSLKLSTNAESQLD
			STRRSGMYKPTLWDFDRIQSLNSVYTEEKYSTRACDLIQQVKKLLEESDWFRQLQLIDDL
			QRLGLSYRFDDEINLILNTIYFEKKFCEKEMDLYSTSLAFRLLRQHGLKVSQEVFDCFKN
			EEGDFEARLGDETNGILEMCEASFLATEGEETLELARLFTTNILQKKLDDERNELLIMDD
			YLRTLIRHSLDLPLYWRVQRPSARWFIEAYATRSDMNPIMLELAKLDFNIVQATHQEELK
			QVSRWWKESRLAEKLPFARDRVVENYLWNRGMLFPPQYGYPRIMNAKLFVLITVLDDIYD
			VYGTLEETQLFTNLITRWDVEAIGQLPEYMRICYMAIDNNINELAYEVLKQHGLLIIQDL
			RKFWADLCVAYGKEAEWYYTGYKPTLEEYLEVAWVSISAHLILGYMFFLTSNPIEKEASQ
			SLSNYHNIIRNSAMVLRLADDLGTSPYEMQRGDVPKAVECYMNENGASTEEAREYVKHLL
			REVWKETNGERFKESPFTPSFMRICADLGRMAQFMYQHGDGHGIRNLQMEDRIQSLIFEPIV
CINS_SALFT	A6XH05	Salvia fruticosa	>sp|A6XH05|CINS1_SALFT Cineole synthase 1, chloroplastic OS=Salvia fruticosa OX=268906 GN=CinS1 PE=1 SV=1	DOI: 10.1105/tpc.106.047779
			MSSLIMQVVIPKPAKFFHNNLFSLSSKRHRFSTTTTTRGGRWARCSLQTGNEIQTERRTG
			GYQPTLWDFSTIQSFDSEYKEEKHLMRAAGMIDQVKMMLQEEVDSIRRLELIDDLRRLGI
			SCHFEREIVEILNSKYYTNNEIDERDLYSTALRFRLLRQYDFSVSQEVFDCFKNAKGTDF
			KPSLVDDTRGLLQLYEASFLSAQGEETLRLARDFATKFLQKRVLVDKDINLLSSIERALE
			LPTHWRVQMPNARSFIDAYKRRPDMNPTVLELAKLDFNMVQAQFQQELKEASRWWNSTGL
			VHELPFVRDRIVECYYWTTGVVERRQHGYERIMLTKINALVTTIDDVFDIYGTLEELQLF
			TTAIQRWDIESMKQLPPYMQICYLALFNFVNEMAYDTLRDKGFDSTPYLRKVWVGLIESY
			LIEAKWYYKGHKPSLEEYMKNSWISIGGIPILSHLFFRLTDSIEEEAAESMHKYHDIVRA
			SCTILRLADDMGTSLDEVERGDVPKSVQCYMNEKNASEEEAREHVRSLIDQTWKMMNKEM
			MTSSFSKYFVEVSANLARMAQWIYQHESDGFGMQHSLVNKMLRDLLFHRYE
FENS_LAVPL	T1RRR9	Lavandula pedunculata subsp. lusitanica	>sp|T1RRR9|FENS_LAVPL (-)-endo-fenchol synthase, chloroplastic OS=Lavandula pedunculata subsp. lusitanica OX=1343917 GN=FENS PE=1 SV=1	DOI: 10.1111/ppl.12241
			MSSLVMHVGIVNKPAITYLPTLSRSASNLHNVSSTRLQTSCSLQLDYKPVDETRRSGNYQ
			PSAWDFEYIQSLKNKYKEEKYLTRHTKLTVQVKMLLDEDMEAVQQLDFIEDLNNLGISYL
			FKDKITQILNHIYNEHRCFHNNEAEESDLYFTALGFRLLRQHGFKVSQEVFDCFKNEKYT
			NFKASLAGDTKGLLQLYEASFLLREGEDTLELARKFSTKLLQQKIDEGEPDNNLLSCIRH
			SLELPLHWRLQRLEARWFLDAYATRHDMNPIIFELAKLEFNITQATQQEELKDLSRWWNS
			TGLAEKLPFARDRIVESYFWAMGTFEPHQYGYQRELVSKIIALTTVVDDIYDVYGTLEEL
			ELFTDVIRRWETESIDELPYYIQLCYLAVNKFVFDLAHDVLKDKGFNSLPYLKRSWKDLI
			ERYLIEAKWYHNRYTPSLEEYLNNARVTITCPTILSQIYFALASPIEKPVIEVMYKYHDI
			LYLSGMLLRLPDDLGTAPFELKRGDVPKAVQCYMKERNVPEKEAREHVRFLIREASKQMN
			TAMAIDCPFTEDFAVAAANLGRVANLAYVEGDGFGVQHSNIYEHIGSLMFKPYA
APINS_LAVPL	T1RR71	Lavandula pedunculata subsp. lusitanica	>sp|T1RR71|PINS_LAVPL Alpha pinene synthase, chloroplastic OS=Lavandula pedunculata subsp. lusitanica OX=1343917 GN=PINS PE=1 SV=1	DOI: 10.1111/ppl.12241
			MSSISMHAGPLNISAANNHHPSWDRRVSKPRRVAAKHLGLRLSCSLQLDGKPLDETRRSA
			NYQPSAWDFNFIQSLHNQYKEDKYVTRHTELTAQVKMLLEEETDAVQQLDLIEDLKNLGI
			NYLFKDKIQQILNHIYNQHRCFQNNQVEGNDLYFTALGFRLLRQHGFEVSQEVFDRFTNE
			EGTDFNPSLIDDTKGLLQLYEASFLLREGEDTLELARQFSTKLLQKKVDEDGDREVGDNL
			LVWIRHSLELPLHWRIHRIEARWFLDAYATRHDMNPIIFELAKLDFNITQATQQEELRDL
			SRWWNSAGLVEKLSFARDRVVESYFWAIGTLEPRQYGYQRKLVAKIIALISVVDDVYDIY
			GTLDELKLFTDVMRRWDAESFDQLPYYMKICYLIINNFIFELAYDILKDKGFNSLSYLQR
			SWLDVVEGYFTEAKWYYSGYTPNLEEYLKNAKITVTCPMILSQIYFTIASSIEKPELESM
			YKYHDILYLSGLLLRLPDDLGTALHELKRGDAPKAMQCYMKEKNVPEKEAREHVRFLIRE
			ASKQMNTVSAADCPFPDDFVAAAANLGRVANFVYVDGDGFGDQHSKMLQQIAALMFEPYD
FENS_LAVST	T1RRJ4	Lavandula stoechas	>sp|T1RRJ4|FENS_LAVST (-)-endo-fenchol synthase, chloroplastic OS=Lavandula stoechas OX=39333 GN=FENS PE=1 SV=1	DOI: 10.1111/ppl.12241
			MSSLVMHVGIVNKPAITYLPTLSRRASNLHNVSSTRLQTSCSLQLDYKPVDETRRSGNYQ
			PSAWDFEYIQSLKNKYKEEKYLTRHTKLTVQVKMLLDEDMEAVQQLDFIEDLNNLGISYL
			FKDKITQILNHIYNEHRCFHNNEAEESDLYFTALGFRLLRQHGFKVSQEVFDCFKNEKYT
			NFKASLAGDTKGLLQLYEASFLLREGEDTLELARKFSTKLLQQKIDEGEPDNNLLSCIRH
			SLELPLHWRLQRLEARWFLDAYATRHDMNPIIFELAKLEFNITQATQQEELKDLSRWWNS
			TGLAEKLPFARDRIVESYFWAMGTFEPHQYGYQRELVSKIIALTTVVDDIYDVYGTLEEL
			ELFTDVIRRWETESIDELPYYIQLCYLAVNKFVFDLAHDVLKDKGFNSLPYLKRSWKDLI
			ERYLIEAKWYHNRYTPSLEEYLNNARVTITCPTILSQIYFALASPIEKPVIEVMYKYHDI
			LYLSGMLLRLPDDLGTAPFELKRGDVPKAVQCYMKERNVPEKEAREHVRFLIREASKQMN
			TAMAIDCPFTEDFAVAAANLGRVANLAYVEGDGFGVQHSNIYEHIGSLMFKPYA
APINS_LAVST	T1RRL8	Lavandula stoechas	>sp|T1RRL8|PINS_LAVST Alpha pinene synthase, chloroplastic OS=Lavandula stoechas OX=39333 GN=PINS PE=2 SV=1	DOI: 10.1111/ppl.12241
			MSSISMHARPLNISAANNHHPSWDRRVSKPRRVAAKHLRLRLSCSLQLDGKPLDETRRSA
			NYQPSAWDFNFIQSLHNQYKEDKYVTRHTELTAQVKMLLEEETDAVQQLDLIEDLKNLGI
			NYLFKDKIQQILNHIYNQHRCFQNNQVEGNDLYFTALGFRLLRQHGFEVSQEVFDRFTNE
			EGTDFNPSLIDDTKGLLQLYEASFLLREGEDTLELARQFSTKLLQKKVDEDGDREVGDNL
			LVWIRHSLELPLHWRIHRIEARWFLDAYATRHDMNPIIFELAKLDFNITQATQQEELRDL
			SRWWNSAGLVEKLSFARDRVVESYFWAIGTLEPRQYGYQRKLVAKIIALISVVDDVYDIY
			GTLDELKLFTDVMRRWDAESFDQLPYYMKICYLIINNFIFELAYDILKDKGFNSLSYLQR
			SWLDVVEGYFTEAKWYYSGYTPNLEEYLKNAKITVTCPMILSQIYFTIASSIEKPELESM
			YKYHDILYLSGLLLRLPDDLGTALHELKRGDVPKAMQCYMKEKNVPEKEAREHVRFLIRE
			ASKQMNTVSAADCPFPDDFVAAAANLGRVANFVYVDGDGFGDQHSKMLQQIAALMFEPYD
FENS_LAVVI	T1RR72	Lavandula viridis	>sp|T1RR72|FENS_LAVVI (-)-endo-fenchol synthase, chloroplastic OS=Lavandula viridis OX=1343918 GN=FENS PE=1 SV=1	DOI: 10.1111/ppl.12241
			MSSLVMHVGIVNKPAITYLPTLSRSASNLHNVSSTRLQTSCSLQLDYKPVDETRRSGNYQ
			PSAWDFEYIQSLKNKYKEEKYLTRHTKLTVQVKMLLDEDMEAVQQLDFIEDLNNLGISYL
			FKDKITQILNHIYNEHRCFHNNEAEESDLYFTALGFRLLRQHGFKVSQEVFDCFKNEKYT
			NFKASLAGDTKGLLQLYEASFLLREGEDTLELARKFSTKLLQQKIDEGEPDNNLLSCIRH
			SLELPLHWRLQRLEARWFLDAYATRHDMNPIIFELAKLEFNITQATQQEELKDLSRWWNS
			TGLAEKLPFARDRIVESYFWAMGTFEPHQYGYQRELVSKIIALTTVVDDIYDVYGTLEEL
			ELFTDVIRRWETESIDELPYYIQLCYLAVNKFVFDLAHDVLKDKGFNSLPYLKRSWKDLI
			ERYLIEAKWYHNRYTPSLEEYLNNARVTITCPTILSQIYFALASPIEKPVIEVMYKYHDI
			LYLSGMLLRLPDDLGTAPFELKRGDVPKAVQCYMKERNVPEKEAREHVRFLIREASKQMN
			TAMAIDCPFTEDFAVAAANLGRVANLAYVEGDGFGIQHSNIYEHIGSLMFKPYA
PINS_LAVVI	T1RRI8	Lavandula viridis	>sp|T1RRI8|PINS_LAVVI Alpha pinene synthase, chloroplastic OS=Lavandula viridis OX=1343918 GN=PINS PE=1 SV=1	DOI: 10.1111/ppl.12241
			MSSISMHAGPLNISAANNHHPSWDRRVSKPRRVAAKHLRLRLSCSLQLDGKPLDETRRSA
			NYQPSAWDFNFIQSLHNQYKEDKYVTRHTELTAQVKMLLEEETDAVQQLDLIEDLKNLGI
			NYLFKDKIQQILNHIYNQHRCFQNNQVEGNDLYFTALGFRLLRQHGFEVSQEVFDRFTNE
			EGTDFNPSLIDDTKGLLQLYEASFLLREGEDTLELARQFSTKLLQKKVDEDGDREVGDNL
			LVWIRHSLELPLHWRIHRIEARWFLDAYATRHDMNPIIFELAKLDFNITQATQQEELRDL
			SRWWNSAGLVEKLSFARDRVVESYFWAIGTLEPRQYGYQRKLVAKIIALISVVDDVYDIY
			GTLDELKLFTDVMRRWDAESFDQLPYYMKICYLIINNFIFELAYDILKDKGFNSLSYLQR
			SWLDVVEGYFTEAKWYYSGYTPNLEEYLKNAKITVTCPMILSQIYFTIASSIEKPELESM
			YKYHDILYLSGLLLRLPDDLGTALHELKRGDVPKAMQCYMKEKNVPEKEAREHVRFLIRE
			ASKQMNTVSAADCPFPDDFVAAAANLGRVANFVYVDGDGFGDQHSKMLQQIAALMFEPYD
BPPS_LAVIN	UUB32234	Lvandula Intermedia	>UUB32234.1 bornyl diphosphate synthase [Lavandula x intermedia]	DOI: 10.1007/s11103-022-01315-3
			MPVGILHMPAANLLHNWDNRATTPRRFSSTPVATRLRTSCSLQLDGKPVDNVRRSGNYQPSAWDFNFIQS
			LNNQYKEEMYLTRHTQLTELVKMVLEEEMEAVQQLDFIEDLKNLGISYLFKDKITQILNHIYNEHKCFHD
			NEVEESDLYFTALGFRLLRQYGFEVSQEVFDCFKNEKGTNFKGSLGGHTKGLLQLYEASFLMREGEDTLE
			VARQFSTKLLQQKVDEGEVDDNILLWIRHSLELPLHWRVQRLEARWFLDSYARRPDVNPIILELAKLEFN
			ITQAKHQEELKDLSRWWNSTCIAEKLPFARDRVVEAQFWAIGVLEPHQYGYQRELVAKIIALTTVVDDVY
			DVYGTLDELKLFTEAIRRWDTESIDTLPYYMQLCYLAVNNFVSELAYDILKEKSFNSLPYLQRSWLDLVE
			AYFKEAKWYYNGYTPSLEEYLNNAKITITCPAIVSEIYFTFGASIDKAVIESMYKYHDILYLSGMLLRLP
			DDLGTAPFELKRGDVPKAVQCYMKERNAPEKEAREHIRFLIREAWKQMNTVMATDCPFTDDFAVAAANLG
			RVANFVYVDGDGFGVQHSKIHQQMADLMFEPYA
LMNS_LAVAN	Q2XSC6	Lavandula angustifolia	>sp|Q2XSC6|LALIM_LAVAN (R)-limonene synthase OS=Lavandula angustifolia OX=39329 PE=1 SV=1	DOI: 10.1016/j.abb.2007.06.011
			MSIISMHVGILNRPAAYNHLRNLDRRASKPRHVSSTAAATRLRVSCATQLEIKSVDETRR
			SGNYNPTAWDFNYIQSLDNQYKKERYSTRHAELTVQVKKLLEEEMEAVQKLELIEDLKNL
			GISYPFKDNIQQILNQIYNEHKCCHNSEVEEKDLYFTALRFRLLRQQGFEVSQEVFDHFK
			NEKGTDFKPNLADDTKGLLQLYEASFLLREAEDTLELARQFSTKLLQKKVDENGDDKIED
			NLLLWIRRSLELPLHWRVQRLEARGFLDAYVRRPDMNPIVFELAKLDFNITQATQQEELK
			DLSRWWNSTGLAEKLPFARDRVVESYFWAMGTFEPHQYGYQRELVAKIIALATVVDDVYD
			VYGTLEELELFTDAIRRWDRESIDQLPYYMQLCFLTVNNFVFELAHDVLKDKSFNCLPHL
			QRSWLDLAEAYLVEAKWYHSRYTPSLEEYLNIARVSVTCPTIVSQMYFALPIPIEKPVIE
			IMYKYHDILYLSGMLLRLPDDLGTASFELKRGDVQKAVQCYMKERNVPENEAREHVKFLI
			REASKQINTAMATDCPFTEDFAVAAANLGRVANFVYVDGDGFGVQHSKIYEQIGTLMFEPYP
RMLIN_LAVAN	Q2XSC5	Lavandula angustifolia	>sp|Q2XSC5|LALIN_LAVAN R-linalool synthase OS=Lavandula angustifolia OX=39329 PE=1 SV=1	DOI: 10.1016/j.abb.2007.06.011
			MSININMPAAAVLRPFRCSQLHVDETRRSGNYRPSAWDSNYIQSLNSQYKEKKCLTRLEG
			LIEQVKELKGTKMEAVQQLELIDDSQNLGLSYYFQDKIKHILNLIYNDHKYFYDSEAEGM
			DLYFTALGFRLFRQHGFKVSQEVFDRFKNENGTYFKHDDTKGLLQLYEASFLVREGEETL
			EQAREFATKSLQRKLDEDGDGIDANIESWIRHSLEIPLHWRAQRLEARWFLDAYARRPDM
			NPVIFELAKLNFNIVQATQQEELKALSRWWSSLGLAEKLPFVRDRLVESYFWAIPLFEPH
			QYGYQRKVATKIITLITSLDDVYDIYGTLDELQLFTNLFERWDNASIGRLPEYLQLFYFA
			IHNFVSEVAYDILKEKGFTSIVYLQRSWVDLLKGYLKEAKWYNSGYTPSLEEYFDNAFMT
			IGAPPVLSQAYFTLGSSMEKPIIESMYEYDNILRVSGMLVRLPDDLGTSSFEMERGDVPK
			SVQLYMKETNATEEEAVEHVRFLNREAWKKMNTAEAAGDSPLVSDVVAVAANLGRAAQFM
			YFDGDGNQSSLQQWIVSMLFEPYA
LMNS_PERFR	O04806	Perilla frutescens var. acuta	>tr|O04806|O04806_PERFR Limonene cyclase OS=Perilla frutescens var. acuta OX=279737 PE=2 SV=1	DOI: 10.1006/abbi.1996.0343
			MYTGAIMHMAIPIKPAHYLHNSGRSYASQLCGFSSTSTRAAIARLPLCLRFRCSLQASDQ
			RRSGNYSPSFWNADYILSLNSHYKDKSHMKRAGELIVQVKMVMGKETDPVVQLELIDDLQ
			KLALSHHVEKEIKEILFKISTYDHKIMVERDLYSTALAFRLLRQYGFKVPQEVFDCFKND
			NGEFKRSLSSDTKGLLQLYEASFLLTEGEMTLELAREFATKSLQEKLNEKTIDDDDDADT
			NLISCVRHSLDIPIHWRIQRPNASWWIDAYKRRSHMNPLVLELAKLDLNIFQAQFQQELK
			QDLGWWKNTCLAEKLPFVRDRLVECYFWCTGIIQPLQHENARVTLAKVNALITTLDDIYD
			VYGTLEELELFTEAIRRWDVSSIDHLPNYMQLCFLALNNFVDDTAYDVMKEKDINIIPYL
			RKSWLDLAETYLVEAKWFYSGHKPNLEEYLNNAWISISGPVMLWHVFFRVTDSITRETVE
			SLFKYHDLIRYSSTILRLADDLGTSLEEVSRGDVPKSIQCYMNDNNASEEEARRHIRWLI
			AETWKKINEEVWSVDSPFCKDFIACAADMGRMAQFMYHNGDGHGIQNPQIHQQMTDILFE
			QWL
LMNS_MENSP	Q40322		>tr|Q40322|Q40322_MENSP 4S-limonene synthase OS=Mentha spicata OX=29719 PE=1 SV=1	https://doi.org/10.1016/S0021-9258(19)49419-2
			MALKVLSVATQMAIPSNLTTCLQPSHFKSSPKLLSSTNSSSRSRLRVYCSSSQLTTERRS
			GNYNPSRWDVNFIQSLLSDYKEDKHVIRASELVTLVKMELEKETDQIRQLELIDDLQRMG
			LSDHFQNEFKEILSSIYLDHHYYKNPFPKEERDLYSTSLAFRLLREHGFQVAQEVFDSFK
			NEEGEFKESLSDDTRGLLQLYEASFLLTEGETTLESAREFATKFLEEKVNEGGVDGDLLT
			RIAYSLDIPLHWRIKRPNAPVWIEWYRKRPDMNPVVLELAILDLNIVQAQFQEELKESFR
			WWRNTGFVEKLPFARDRLVECYFWNTGIIEPRQHASARIMMGKVNALITVIDDIYDVYGT
			LEELEQFTDLIRRWDINSIDQLPDYMQLCFLALNNFVDDTSYDVMKEKGVNVIPYLRQSW
			VDLADKYMVEARWFYGGHKPSLEEYLENSWQSISGPCMLTHIFFRVTDSFTKETVDSLYK
			YHDLVRWSSFVLRLADDLGTSVEEVSRGDVPKSLQCYMSDYNASEAEARKHVKWLIAEVW
			KKMNAERVSKDSPFGKDFIGCAVDLGRMAQLMYHNGDGHGTQHPIIHQQMTRTLFEPFA
LMNS_NETE	Q9FUW5	Nepeta tenuifolia	>tr|Q9FUW5|Q9FUW5_9LAMI (+)-4R-limonene synthase OS=Nepeta tenuifolia OX=2849020 PE=2 SV=2	DOI: 10.1248/bpb.24.373
			MALKMTSAVMQMAIPTKLANFVNNSDTHKQSLKLLRNVSTISTSAAAATPRHRLPVCCSA
			SSSSSSQLPTIERRSGNYKPSRWDVDFMQSLNSDYQEERHRTKASELITQVKNLLEKETS
			DDPIRQLELIDDLQRLGLSDHFEHEFKEVLNSIYLDNKYYNINIMKETTSSRDLYSTALA
			FRLLREHGFQVAQEVFDCFKNEEGEFKASLSDDPRGLLQLYEASFLFKEGENTLEIAREF
			ATKLLQEKVNSSDEIDDNLLSSIRYSLEIPTYWSVIRPNVSVWIDAYRKRPDMNPVVLEL
			AILDANIMQAQLQQELKEALGWWRNTWFVEKLPFARDRLVESYFWSTGMVPRRQHKTARQ
			LMAKVIALITVMDDIYDVYGTLEELELFTDAFRRWDVSSIDHLPTYMQLCFLSINNFVVD
			TAYNILKETGVNVTTYLEKSWVDQAENYLMESKWFYSGHKPSLDEYLENSWISVSGPCVL
			THEFFGVTDSLAKDTLDSLYEYHDIVRWSSYLLRLADDLGTSVEEVSRGDVPKSIQCYMN
			DNNASEEEAREHVKGLIRVMWKKMNAERVSEDSPFCKDFIRCCEDLGRMAQFMYHYGDGH
			GTQHAKIHQQITDCLFQPFA
LMNS_AGARU	Q940E7	Agastache rugosa	>tr|Q940E7|Q940E7_AGARU D-limonene synthase OS=Agastache rugosa OX=39271 PE=2 SV=1	DOI: 10.1248/bpb.25.661
			MALKMTSVVMQMAIPTKLANFVHNSDNNKSLKLVRNVSTTCTSAATPRLRLPVCCSSSSS
			SSSQLPTIERRSGNYSPSRWDVDFIQSLNSDYQEERHTRRASELITQVKMLMEKETTDPI
			RQLELIDDLQRLGLSDHFQNEFKEILNTIYLDNKYYNINIMREESRDLYSTALAFRLLRE
			HGFQVAQEVFECFKNEEGDFKASLIDDTRGLLQLYEASFLFKEGENTLEIAREFTTKILQ
			EKLKGDEIDDNLLSSIRYSLEIPNYWSVVRPNVSVWIDEYRKRSDMNPVVLELAILDANI
			VQAQLQLELKESLRWWRNTCFVEKLPFARDRLIESYFWSTGMVEPRQHANARIIMAKVIA
			LITVMDDIYDVYGTLEELEQFTEAFRRWDVSSIDQLPTYMQLCFLAINNFVDDTAYNVLK
			ESGVNVMTYLRKSWVDQAENYLMESKWYYSGHKPSLEEYLENSWISVSGPCVLTHEFFGV
			TDSLAKDTLDSLYEYHDIVRWSSYLLRLADDLGTSVEEVSRGDVPKSIQCYMHDNDASEE
			EARQHIKGLIREMWKKMNVERVSEDSPFCRDFIRCCEDLGRMAQFMYHYGDGHGTQHPKI
			HQQIAACLFQPFA
MYRS_PERFR	Q9LKM5	Perilla frutescens	>tr|Q9LKM5|Q9LKM5_PERFR Mercene synthase OS=Perilla frutescens OX=48386 PE=2 SV=1	DOI: 10.1248/bpb.27.1979
			MYTGVMNMAFPMKPANYLHNSGSSNSSKLCGVSSTSTRAATARLRLRLRCSMQLSDQRRS
			GNYSPSFWNTDYILSLNCDYEDERRMRGAAGELVEQVKMLMEKETDPIVQLELIDVLQKL
			ALSHHFEKEFEGILFNISTIYDDKNRERDLYSTTLAFRLLRQHGYQVPQELFECFKNDKG
			EFKESLSNDTKGLLQLYEASFLLTEGETTLELAREFATKFLQEKEKLNIDDDDDTNLISC
			VRHSLDMPIYWRIQRPNARWWIHAYNRRTHINPLVLELSKLDFNIIQAQYQQELKQDLRW
			WRNTCIAEKLPFARDRLVESYFWSTGIIQPRQHENARIMMAKALALITTLDDVYDVYGTL
			EELELFIEAIRRWEISSIDQLPNYMQLCFLTINNFVDDTAYDVMKEKDINIIPYLRKSWV
			DLAEAYLVEAKWFYGGYKPNLEEYLNNGWISVSGPAILCHVFFGVTDSITMETVESLFKY
			HDLIRCSSTLVRLADDLATSLDEVSRGDVPKSIQCYMNDNNASEEEARLHVRWLIAETWK
			EMNVEMVSADSPFCKDFIACAADMGRMAQYMYHNGDGHGMQNSQIHQQMTDFLFQKLAVR
			DRASTARN
LLOS_MENAQ	Q8H2B4	Mentha aquatica	>sp|Q8H2B4|LLOS_MENAQ R-linalool synthase, chloroplastic OS=Mentha aquatica OX=190902 PE=1 SV=1	DOI: 10.1016/s0003-9861(02)00348-x
			MCTIISVNHHHVAILSKPKVKLFHTKNKRSASINLPWSLSPSSSAASRPISCSISSKLYT
			ISSAQEETRRSGNYHPSVWDFDFIQSLDTDHYKEEKQLEREEELIMEVKKLLGAKMEATK
			QLELIDDLQNLGLSYFFRDEIKNILNSIYKIFQNNNSTKVGDLHFTSLGFRLLRQHGFNV
			SQGVFDCFKNEHGSDFEKTLIGEDTKGVLQLYEASFLLREGEDTLEVARKFSTEFLEEKL
			KAGIDGDNLSSSIGHSLEIPLHWRIQRLEERWFLDAYSRRKDMNPIIFELAKLDFNIIQA
			TQQEELKDLSRWWNDSSLPQKLPFVRDRLVESYYWALGLFEAHKFGYERKTAAKIITLIT
			ALDDVYDIYGTLDELQLFTHVIRRWDTESATQLPYYLQLFYFVLYNFVSEVAYHILKEEG
			FISIPFLHRAWVDLVEGYLQEAKWYYTKYTPTMEEYLNYASITIGAPAVISQIYFMLAKS
			KEKPVIESFYEYDEIIRLSGMLVRLPDDLGTLPFEMKRGDVAKSIQIYMKEQNATREEAE
			EHVRFMIREAWKEMNTTMAANSDLRGDVVMAAANLGRDAQFMYLDGDGNHSQLQHRIANL
			LFKPYV
MYRS_OCIBA	Q5SBP1	Ocimum basilicum	>sp|Q5SBP1|MYRS_OCIBA Beta-myrcene synthase, chloroplastic OS=Ocimum basilicum OX=39350 GN=MYS PE=1 SV=1	doi: 10.1104/pp.104.051318
			MWSTISISMNVAILKKPLNFLHNSNNKASNPRCVSSTRRRPSCPLQLDVEPRRSGNYQPS
			AWDFNYIQSLNNNHSKEERHLERKAKLIEEVKMLLEQEMAAVQQLELIEDLKNLGLSYLF
			QDEIKIILNSIYNHHKCFHNNHEQCIHVNSDLYFVALGFRLFRQHGFKVSQEVFDCFKNE
			EGSDFSANLADDTKGLLQLYEASYLVTEDEDTLEMARQFSTKILQKKVEEKMIEKENLLS
			WTLHSLELPLHWRIQRLEAKWFLDAYASRPDMNPIIFELAKLEFNIAQALQQEELKDLSR
			WWNDTGIAEKLPFARDRIVESHYWAIGTLEPYQYRYQRSLIAKIIALTTVVDDVYDVYGT
			LDELQLFTDAIRRWDIESINQLPSYMQLCYLAIYNFVSELAYDIFRDKGFNSLPYLHKSW
			LDLVEAYFVEAKWFHDGYTPTLEEYLNNSKITIICPAIVSEIYFAFANSIDKTEVESIYK
			YHDILYLSGMLARLPDDLGTSSFEMKRGDVAKAIQCYMKEHNASEEEAREHIRFLMREAW
			KHMNTAAAADDCPFESDLVVGAASLGRVANFVYVEGDGFGVQHSKIHQQMAELLFYPYQ
ATERS1_THYCA	R4JQS2	Thymus caespititius	>sp|R4JQS2|ATPSC_THYCA Alpha-terpineol synthase, chloroplastic OS=Thymus caespititius OX=751871 GN=TPS5 PE=1 SV=2	https://doi.org/10.1007/s00425-013-1884-2
			MSTISIHHVGILRNPLHSKSKRASINKPWSLSLPRSSSASRLVEPCRVSSKTDTKPAEIT
			RRSGNYEPSLWDFDFIQSLDNHHPYVKEEQLKREEELIVQVKILLGTKMEAVKQLELIDD
			LKNLGLSYFFRDEIKTILTSIYNNSFENKNNQVGDLYFTSLGFRLLRQHGFNVSQDIFDC
			FKNEKGSDFDETLIGEDTKATLQLYEASFHLREGENTLELARQISTKYLQKKVNEGRISD
			ENLSSWIRHSLDLPLHWRIQRLEARWFLDAYAVREDKNPLIFELAKLDFNIIQATQQEEL
			KEVSRGWNDSCLAEKLPFVRDRVVESYFWGVGLFEGHEFGYQRKLTAANTLLISAIDDVY
			DVYGTLDELRLFTDVFRRWDTESIDQLPYYMQLCYLALYNYVSGVAYDILKDHRRNTIPY
			LQETWVELVEAYMKEAEWYKSGYTPSLEEYLTIAKISIASLTILLSVELSLPDSTIDRAT
			FDRRHKMFYLSATVSRLADDLGTAPSELERGDVPKAIQCYMKDTNASEEEARGHVRFMIG
			ETWKELNTAMAKPDDCPFTEQVVEATANLGRAAQFIYREGDGHGHFQIHQHMGNLFFHPYV
ATERS2_THYCA	R4JJJ1	Thymus caespititius	>sp|R4JJJ1|ATPS3_THYCA Alpha-terpineol synthase, chloroplastic OS=Thymus caespititius OX=751871 GN=TPS5 PE=1 SV=2	https://doi.org/10.1007/s00425-013-1884-2
			MSTISIHHVGILRNPLHSKSKRASINKPWSLSLPRSSSASRLVEPCRVSSKTDTKPAEIT
			RRSGNYEPSLWDFDFIQSLDNHHPYVKEKQLKREEELIVQVKMLLGTKMEAVKQLELIDD
			LKNLGLSYFFRDEIKTILTSIYNNSFENKNNQVGDLYFTSLGFRLLRQHGFNVSQDIFDC
			FKNEKGSDFDETLIGEDTKATLQLYEVSFHLREGENTLELARQISTKYLQKQVNEGRISD
			ENLSLWIRHSLDLPLHWRIQRLEARWFLDAYAAREDKNPLIFKLAKLDFNIIQATQQEEL
			KEVSRWWNDSCLAEKLPFVRDRVVESYFWGVGLFEGHEFGYQRKLTAAYILLISAIDDVY
			DVYGTLDELRLFTDVFRRWDTESIDQLPYYMQLCYLALHNYVSGVAYDILKDHRRNTIPY
			LQETWVELVEAYMKEAEWYQSGYTPSLEEYLTIAKISIGSLPILLSVELSLPDSTIDRAT
			FDRRHKMFYLSATVSRLADDLGTAPSELERGDVPKAIQCYMKDTNASEEEAQGHVRFMIR
			EAWKELNTAMAEPDDCPFTEQVVEATANIGRAAQYIYREGDGHGHFQIRQHVRNLFFHPYV
LMNS_MENL	QZX44673	Mentha longifolia	(-)-limonene synthase 2 [Mentha longifolia]	https://doi.org/10.1093/g3journal/jkac112
		CMEN 585	MAFKVFSVATQMAIPSNLTTCLQPSHLKSSPKLLSSTNSSSRSRLRVYCSSSQLTTERRSGNYNPSRWDV
			DFIQSLHSDYKEDKHAIRASELVTLVKMELEKETDHIRQLELIDDLQRMGLSDHFQNEFKEILSSIYLDH
			HYYKNPFPKEERDLYSTSLAFRLLREHGFQVAQEVFDSFKNEEGEFKESLSHDTRGLLQLYEASFLLTEG
			ETTLESAREFATKFLEERVNEGGVDGDLLTRIAYSLDIPLHWRIKRPNAPVWIEWYRKRPDMNPVVLELA
			ILDLNIVQAQFQEELKESFRWWRNTGFVEKLPFARDRLVECYFWNTGIIEPRQHASARIMMGKVNALITV
			IDDIYDVYGTLEELEQFTDLIRRWDINSIDQLPDYMQLCFLALNNFVDDTSYDVMKEKGVNVIPYLRQSW
			VDLADKYMVEARWFYGGHKPSLEEYLENSWQSISGPCMLTHIFFRVTDSFTKETVDSLYKYHDLVRWSSF
			VLRLADDLGTSVEEVSRGDVPKSLQCYMSDYNASEAEARKHVKWLIAEVWKKMNAERVSKDSPFGKDFIG
			CAADLGRMAQLMYHNGDGHGTQHPIIHQQMTRTLFEPFA
BPINS_MENL	OL634843	Mentha longifolia	(-)-beta-pinene synthase [Mentha longifolia]	https://pubs.acs.org/doi/10.1021/acscatal.2c01836
		CMEN 585	RRSGSYSPSRWSVDFIHSLDTDVKELEKRAARASELITQVKKEVEKERDPIRQLELIDELQSLGLSDHFRDE
			FKEILNSVYLDHKYYKNPDSKDLYFTSLAFTLLREHGFQVAQEVFDCFKNEEGEFKASLGDDTRGLLQLYEA
			SFLLKEGENTLESAREFAAKFLQEEVKEGGVDDNLLTRIAYSMDIPIHWRIKRPNSTVWIDSCRKRPHMNP
			LVLELAILDSNLLQARYQEELKQAFRWWRNTCFVEKLPFARDRLVECYFWTTGIIEPRQHASGRITVAK
			VNALITTIDDVYDVYGTLEELQQFTEAIHKWDVSSISHLPTYMQLCFLALDNFVNDTAYDVLKEKGFNIIP
			YLRKTWRDLVDAYLIEAKWYNNGHKPNLEEYLNTAWISIGATVILTHAFFRVTDSFTTETVDSLYKYHDLV
			RWSALILRLADDLGTSVDEVSRGDVPKSIQCYMNDNNASEAEAREHVKWLIAETWKKMNEERVKKDSP
			FCEDFIGCAVDLGRMAQYMYHYGDGHGIQHPIIHQQMTTCLFEPCA
Ml_15999	OP784760	Mentha longifolia	(+)-alpha-terpineol synthase	current work
		CMEN 585	RRSGNYEPSLWDFDYIQSLDTHRYKEEKHLIREEELIVQVKMLLGKEMEAVKQLELIDDLKNLGLSYFFQDEIKKILSCIYNEHNFSQNNKVRDLHFTALGFRLLRHHGFDVSQEIFDCFKNEEGSDFEKALIGEDMKGILQLYEASFLLREGEDTLELARKFSTKYLQKRVDEGIINDDNNNNILSWIRHSLDLPLHWRIQRLEARWFLDAYSTRKDMNPLIFELSILDFNNIQATHILELKEVSRWWNNSCLAEKLPFVRDRVVESFFWAAGLFEGHEYGYQRKMVASIIILITAIDDVYDVYGTLGELQLFTDTIRRWDTESIDQLPYYMQLCYLALYNYVSNLAYDILKDRRFNTIPYLHKSWLCLVETYLKEAEWYESGYTPTLEEYLSNAKIS…
Ml_14850	OP784761	Mentha longifolia	gamma-terpinene synthase	current work
		CMEN 585	RRSGNYQPSLWDFDYIQSLNTHHYKEERQLNREEELIIQVKKMLLGEKMEAVKQLELIDDLKNLGLSYFFQDEIKKILSCIYNEHNFFQNNKVGDLHFTALGFRLLRHHGFDVSQEIFDCFKNEEGSDFEKTLIGEDTKGMLQLYEASFLLREGEDTLELARKFSTKYLQKRVDEGIRNDDNNLLSWIRHSLDLPLHWRIQRLEARWFLDAYSRRKDMNPLIFELAILDFNNIQATQLEELKEVSRWWNSSCLAEKLPFVRDRIVECYFWALGLFEPHENGYQRKKAAIIITFVTIIDDVYDVYGTLDELQLFTNTIQRWDTDTINQLPYYMQVCYLALYTFVSEMAYDILKEQGFNSIPYLQKSWVSLVEGFFKEAQWYYKGYTPTLEEYLNNAKISI…
Ml_38055	OP784758	Mentha longifolia	(-)-bornyl diphosphate synthase	current work
		CMEN 585	MRRSGNYKPTLWDFDRIQSLNSVYTEEKYATRASELVVVVKKLLEEESSWFGQLELIDDLQRLGLSYHFEDEIRQILSSIYLDDKYCKKMDLYSTSLCFRLLRQHGFKVSQDVFNCFKNKKGDFESSLGEDMKGLLELYEASFLLTHGEETLEQARVFSTNLLQKKLDDGEIMDEHLLNLVRHSLRLPLHWSVQRPNARWFIDACAKKRLENTNPILLELAKLDFNIVQAAHQQELKHVSRWWEESKLAEKLPFARDRVVENYIWNVGLLFEPQYGYPRIMTTKLFILITVIDDISDVYGTLEETQLFNDTIQRWDTEGLDKLPEYMQICYLALDSFIDEAAYHVLKEQGVLIIQDLRKSWADLCAAYAKEAEWYYTGYKPTLEEYMEVAWISISAHTI…
Mp_12413	OP784759	Mentha x piperita	1,8-cineole synthase	current work
		Black Mitcham	MSTIIMSMTLPNKPTICVDNFATKYPNLRRAFPVSCRRRQSSAVKLSANTACTDELQST
			RRSGNYEPTLWDFDRIQSLNSVCTERDGRRAAVLIKEVKMLLQEEVDGVLRQLELIDDLQRLGISCHFN
			EEIKQILNSFYYNEFNDAIVAEERDLYFTALAFRLLRQHGFNVSQEVFDYFKSEEGIDDFKTIHAEDTKGLL
			QLYEASFLSTQGEETLELAREYALKFLQKILDHEIINDENLSSSILRDAIKIPIHWRVQMPNARSYIDAYERKP
			RMHPIVLELAKLEITIVQAQFQQELKETSRWWHSTSLVQQLPFVRDRIVECYYWTTGVLERREHGYERI
			MLTKINALVTTIDDIYDIYGTFEELQLFTNAIKRWDIESMNQLPPYMQQCYLALQNFVNEMAYNTLKQKG
			FNSIPYLHKTWVDLVEAYMREAEWYHNGHKPSLEEYMNNAWISIGGVPILSHIFFCVTDSIDEVTVERV
			HEYHDIVRASCTILRLADDLGTSLDEVKRGDVPKSVECYMNDEKNASEQEARAHVRSIIKNTWKTMNE
			EMMTSTNSQFSKYFVEAAANLGRMSLCIYQDECDGFGMQHSRVNKMLRGLLFDPCI-

## Sheet: Outlier
S.No	Identifier	Uniprot accession number		, full species name	amino acid sequence	DoI
						DOI: 10.1002/cbic.201100330
	CINS_STCL	B5GMG2		Streptomyces clavuligerus	>sp|B5GMG2|CNSA_STRCL 1,8-cineole synthase OS=Streptomyces clavuligerus OX=1901 GN=cnsA PE=1 SV=1
					MPAGHEEFDIPFPSRVNPFHARAEDRHVAWMRAMGLITGDAAEATYRRWSPAKVGARWFY
					LAQGEDLDLGCDIFGWFFAYDDHFDGPTGTDPRQTAAFVNRTVAMLDPRADPTGEHPLNI
					AFHDLWQRESAPMSPLWQRRAVDHWTQYLTAHITEATNRTRHTSPTIADYLELRHRTGFM
					PPLLDLIERVWRAEIPAPVYTTPEVQTLLHTTNQNINIVNDVLSLEKEEAHGDPHNLVLV
					IQHERQSTRQQALATARRMIDEWTDTFIRTEPRLPALCGRLGIPLADRTSLYTAVEGMRA
					AIRGNYDWCAETNRYAVHRPTGTGRATTPW
	ECOPPS_ARATH	Q38802		Arabidopsis thaliana	>sp|Q38802|KSA_ARATH Ent-copalyl diphosphate synthase, chloroplastic OS=Arabidopsis thaliana OX=3702 GN=GA1 PE=1 SV=1
					MSLQYHVLNSIPSTTFLSSTKTTISSSFLTISGSPLNVARDKSRSGSIHCSKLRTQEYIN
					SQEVQHDLPLIHEWQQLQGEDAPQISVGSNSNAFKEAVKSVKTILRNLTDGEITISAYDT
					AWVALIDAGDKTPAFPSAVKWIAENQLSDGSWGDAYLFSYHDRLINTLACVVALRSWNLF
					PHQCNKGITFFRENIGKLEDENDEHMPIGFEVAFPSLLEIARGINIDVPYDSPVLKDIYA
					KKELKLTRIPKEIMHKIPTTLLHSLEGMRDLDWEKLLKLQSQDGSFLFSPSSTAFAFMQT
					RDSNCLEYLRNAVKRFNGGVPNVFPVDLFEHIWIVDRLQRLGISRYFEEEIKECLDYVHR
					YWTDNGICWARCSHVQDIDDTAMAFRLLRQHGYQVSADVFKNFEKEGEFFCFVGQSNQAV
					TGMFNLYRASQLAFPREEILKNAKEFSYNYLLEKREREELIDKWIIMKDLPGEIGFALEI
					PWYASLPRVETRFYIDQYGGENDVWIGKTLYRMPYVNNNGYLELAKQDYNNCQAQHQLEW
					DIFQKWYEENRLSEWGVRRSELLECYYLAAATIFESERSHERMVWAKSSVLVKAISSSFG
					ESSDSRRSFSDQFHEYIANARRSDHHFNDRNMRLDRPGSVQASRLAGVLIGTLNQMSFDL
					FMSHGRDVNNLLYLSWGDWMEKWKLYGDEGEGELMVKMIILMKNNDLTNFFTHTHFVRLA
					EIINRICLPRQYLKARRNDEKEKTIKSMEKEMGKMVELALSESDTFRDVSITFLDVAKAF
					YYFALCGDHLQTHISKVLFQKV
