# Supplementary material for: Biochemical basis for the formation of organ-specific volatile blends in mint
Source: Front Plant Sci. 2023 Apr 14;14:1125065. doi: 10.3389/fpls.2023.1125065 (PMC10140540; doi:10.3389/fpls.2023.1125065)
Supplement: Supplementary Table 2 — Complete terpenoid profiles for the data sets included in Table 1 . [file Table_2.xlsx]

## Sheet: Sheet1
Peppermint						Spearmint						M. longifolia CMEN 584						M. longifolia CMEN 585
	Liquid Inj.	HS-SPME	HS-SPME				Liquid Inj.	HS-SPME	HS-SPME				Liquid Inj.	HS-SPME	HS-SPME				Liquid Inj.	HS-SPME	HS-SPME
Avg. Rel. % ± Std. Err.	Extract	Extract	Leaf-rub			Avg. Rel. % ± Std. Err.	Extract	Extract	Leaf-rub			Avg. Rel. % ± Std. Err.	Extract	Extract	Leaf-rub			Avg. Rel. % ± Std. Err.	Extract	Extract	Leaf-rub
a-thujene	tr	tr	tr			a-thujene	tr	0.1 ± 0.01	0.1 ± 0.1			a-thujene	0.1 ± 0.01	tr	tr			a-thujene	tr	tr	tr
a-pinene	1.3 ± 0.04	0.5 ± 0.09	0.2 ± 0.1			a-pinene	0.9 ± 0.1	0.3 ± 0.1	tr			a-pinene	1.0 ± 0.1	0.3 ± 0.02	0.1 ± 0.1			a-pinene	2.4 ± 0.2	1.4 ± 0.7	0.2 ± 0.04
camphene		tr				camphene		tr	tr			camphene	0.6 ± 0.3	0.2 ± 0.02	0.1 ± 0.03			camphene	0.5 ± 0.3	0.7 ± 0.5	0.1 ± 0.02
sabinene	0.4 ± 0.02	tr	0.1 ± 0.1			sabinene	0.3 ± 0.03	0.1 ± 0.04	0.1 ± 0.1			sabinene	0.4 ± 0.04	0.2 ± 0.04	tr			sabinene	0.6 ± 0.01	0.1 ± 0.1	tr
1-octen-3-ol		tr	tr			1-octen-3-ol		tr	tr			1-octen-3-ol		tr	tr			1-octen-3-ol
B-pinene	2.2 ± 0.06	0.7 ± 0.1	tr			B-pinene	1.4 ± 0.1	0.4 ± 0.1	0.1 ± 0.04			B-pinene	1.7 ± 0.1	0.4 ± 0.1	0.3 ± 0.2			B-pinene	3.1 ± 0.1	0.8 ± 0.3	0.3 ± 0.1
3-octanone		tr	tr			3-octanone		tr	tr			3-octanone		tr	0.1 ± 0.04			3-octanone		tr	0.1 ± 0.02
myrcene		0.2 ± 0.07	tr			myrcene	0.1 ± 0.02	1.6 ± 0.5	0.8 ± 0.5			myrcene	0.2 ± 0.03	0.4 ± 0.1	0.1 ± 0.04			myrcene		0.8 ± 0.4	0.2 ± 0.04
3-octanol		0.1 ± 0.03	0.3 ± 0.07			3-octanol	1.6 ± 0.1	1.4 ± 0.2	3.1 ± 1.5			3-octanol	1.3 ± 0.03	0.9 ± 0.03	2.1 ± 0.5			3-octanol		0.2 ± 0.1	0.5 ± 0.1
a-phellandrene		0.9 ± 0.2	1.6 ± 0.4			a-phellandrene		0.7 ± 0.2	1.0 ± 0.4			a-phellandrene		0.1 ± 0.02	0.2 ± 0.1			a-phellandrene		0.2 ± 0.1	0.2 ± 0.03
a-terpinene	tr	1.3 ± 0.2	1.4 ± 0.5			a-terpinene	tr	0.9 ± 0.2	1.0 ± 0.5			a-terpinene		0.1 ± 0.02	0.2 ± 0.1			a-terpinene		0.2 ± 0.1	0.1 ± 0.02
p-cymene	tr	0.5 ± 0.1	3.0 ± 1.5			p-cymene	tr	0.3 ± 0.1	1.0 ± 0.1			p-cymene	tr	tr	0.1 ± 0.1			p-cymene	tr	1.7 ± 1.2	1.3 ± 0.3
limonene	0.4 ± 0.06	1.0 ± 0.3	0.2 ± 0.07			limonene	7.7 ± 0.5	5.3 ± 1.3	2.5 ± 1.4			limonene	14.1 ± 1.3	7.6 ± 1.2	2.8 ± 0.9			limonene	3.1 ± 0.4	6.4 ± 3.8	0.8 ± 0.2
1,8-cineole	4.1 ± 0.1	2.9 ± 0.7	0.9 ± 0.2			1,8-cineole		1.0 ± 0.1	0.6 ± 0.4			1,8-cineole		tr	tr			1,8-cineole	2.4 ± 0.3	3.2 ± 1.6	1.9 ± 0.3
y-terpinene	0.2 ± 0.02	tr	tr			y-terpinene	1.9 ± 1.8	0.1 ± 0.02	0.1 ± 0.03			y-terpinene	tr	tr	tr			y-terpinene	tr	0.1 ± 0.03	tr
trans-sabinene hydrate	1.0 ± 0.07	0.6 ± 0.4	0.7 ± 0.2			trans-sabinene hydrate	0.6 ± 0.3	0.3 ± 0.1	0.6 ± 0.2			trans-sabinene hydrate	tr	tr	0.1 ± 0.03			trans-sabinene hydrate	tr	0.1 ± 0.1	tr
terpinolene	tr	0.6 ± 0.1	0.5 ± 0.2			terpinolene	tr	0.5 ± 0.1	0.5 ± 0.3			terpinolene	tr	0.1 ± 0.03	0.1 ± 0.03			terpinolene	tr	0.3 ± 0.2	0.1 ± 0.01
linalool		tr	tr			linalool		tr	tr			linalool		tr	tr			linalool		tr	0.1 ± 0.02
camphor						camphor						camphor						camphor
menthone	54.7 ± 0.5	57.7 ± 1.6	63.5 ± 2.4			menthone		tr	tr			menthone						menthone		0.1 ± 0.02	tr
pinocarvone						pinocarvone	tr	tr	0.1 ± 0.1			pinocarvone	tr	tr	tr			pinocarvone		tr
menthofuran	14.4 ± 0.3	16.4 ± 0.5	0.3 ± 0.06			menthofuran						menthofuran						menthofuran		0.1 ± 0.1	tr
isomenthone	6.4 ± 0.6	7.1 ± 0.5	7.4 ± 1.1			isomenthone						isomenthone						isomenthone			tr
neomenthol						neomenthol						neomenthol						neomenthol
d-terpineol						d-terpineol						d-terpineol						d-terpineol
borneol						borneol		tr	0.1 ± 0.04			borneol	5.7 ± 0.1	4.6 ± 1.2	4.9 ± 1.3			borneol	2.8 ± 0.1	3.2 ± 0.4	2.5 ± 0.4
trans-isopulegone						trans-isopulegone						trans-isopulegone						trans-isopulegone
menthol	6.6 ± 0.04	4.7 ± 1.5	13.0 ± 1.3			menthol						menthol						menthol
terpinen-4-ol	0.1 ± 0.06	0.4 ± 0.2	0.7 ± 0.2			terpinen-4-ol	0.1 ± 0.1	0.3 ± 0.03	0.3 ± 0.1			terpinen-4-ol	tr	tr	tr			terpinen-4-ol		tr	tr
cis-isopulegone						cis-isopulegone						cis-isopulegone						cis-isopulegone	0.1 ± 0.1
isomenthol	tr	tr	tr			isomenthol						isomenthol						isomenthol
neoisomenthol		tr	tr			neoisomenthol						neoisomenthol						neoisomenthol			tr
a-terpineol		tr	tr			a-terpineol		tr				a-terpineol		tr				a-terpineol			tr
myrtenal						myrtenal						myrtenal	0.1 ± 0.1	0.5 ± 0.1	0.5 ± 0.1			myrtenal		tr
cis-dihydrocarvone						cis-dihydrocarvone	tr	0.2 ± 0.02	0.6 ± 0.3			cis-dihydrocarvone	0.3 ± 0.1	0.5 ± 0.04	0.3 ± 0.1			cis-dihydrocarvone		tr
trans-dihydrocarvone						trans-dihydrocarvone	tr	tr	0.1 ± 0.04			trans-dihydrocarvone	tr	0.1 ± 0.04	tr			trans-dihydrocarvone
trans-carveol						trans-carveol	0.3 ± 0.1	tr	tr			trans-carveol						trans-carveol
cis-carveol						cis-carveol	tr	0.1 ± 0.03	tr			cis-carveol						cis-carveol
pulegone	2.7 ± 0.02	1.8 ± 0.9	3.5 ± 1.3			pulegone		0.3 ± 0.3	tr			pulegone			0.1 ± 0.1			pulegone	68.9 ± 1.5	74.3 ± 5.4	90.1 ± 0.9
carvone						carvone	79.3 ± 0.9	83.6 ± 2.4	83.1 ± 8.5			carvone	70.0 ± 1.8	80.5 ± 1.3	85.7 ± 1.7			carvone
cis-piperitone oxide						cis-piperitone oxide						cis-piperitone oxide						cis-piperitone oxide
piperitone	2.1 ± 0.03	0.7 ± 0.6	1.0 ± 0.5			piperitone	tr	0.1 ± 0.04	0.3 ± 0.2			piperitone	tr	0.4 ± 0.2	0.3 ± 0.1			piperitone		tr
trans-piperitone oxide			tr			trans-piperitone oxide						trans-piperitone oxide						trans-piperitone oxide
isopiperitenone	0.1 ± 0.01	tr	tr			isopiperitenone	0.3 ± 0.02	0.1 ± 0.1	0.3 ± 0.2			isopiperitenone	tr	tr	tr			isopiperitenone	0.7 ± 0.1	0.5 ± 0.4	0.1 ± 0.1
neo-menthyl acetate						neo-menthyl acetate						neo-menthyl acetate						neo-menthyl acetate
bornyl acetate						bornyl acetate						bornyl acetate	tr	tr	tr			bornyl acetate		tr
menthyl acetate	tr	tr	tr			menthyl acetate						menthyl acetate			tr			menthyl acetate
carvacrol						carvacrol	tr	tr	0.2 ± 0.1			carvacrol	tr	tr	tr			carvacrol		tr	tr
piperitenone	tr	tr	tr			piperitenone	tr	tr	tr			piperitenone	0.3 ± 0.01	0.2 ± 0.2	0.2 ± 0.1			piperitenone	9.8 ± 0.5	3.4 ± 2.5	0.6 ± 0.1
piperitenone oxide						piperitenone oxide						piperitenone oxide						piperitenone oxide
B-caryophyllene	0.4 ± 0.01	0.5 ± 0.1	0.5 ± 0.2			B-caryophyllene	tr	0.4 ± 0.1	0.9 ± 0.6			B-caryophyllene	tr	tr	tr			B-caryophyllene	tr	tr	tr
(E)-B-farnesene	0.2 ± 0.01	0.2 ± 0.07	0.3 ± 0.2			(E)-B-farnesene	tr	0.6 ± 0.1	1.6 ± 0.9			(E)-B-farnesene		tr	tr			(E)-B-farnesene		tr	tr
a-humulene	tr	tr	tr			a-humulene	tr	0.1 ± 0.01	0.1 ± 0.1			a-humulene		tr	tr			a-humulene		tr	tr
y-muurolene		tr	tr			y-muurolene		0.1 ± 0.1	tr			y-muurolene		0.1 ± 0.04	0.1 ± 0.04			y-muurolene		0.1 ± 0.1	tr
germacrene D	2.3 ± 0.03	0.1 ± 0.05	tr			germacrene D	3.8 ± 0.1	0.3 ± 0.1	0.5 ± 0.4			germacrene D	3.3 ± 0.1	1.7 ± 1.3	0.9 ± 0.5			germacrene D	5.2 ± 0.1	0.9 ± 0.6	0.2 ± 0.1
bicyclogermacrene						bicyclogermacrene						bicyclogermacrene						bicyclogermacrene
a-muurolene		tr	tr			a-muurolene	tr	0.1 ± 0.03	tr			a-muurolene		0.1 ± 0.01	tr			a-muurolene		0.2 ± 0.1	0.1 ± 0.1
y-cadinene	tr	0.1 ± 0.04	0.1 ± 0.02			y-cadinene	tr	0.2 ± 0.04	0.1 ± 0.1			y-cadinene	tr	0.2 ± 0.03	0.1 ± 0.04			y-cadinene	tr	0.3 ± 0.1	0.1 ± 0.04
d-cadinene	tr	0.2 ± 0.05	0.1 ± 0.04			d-cadinene	tr	0.4 ± 0.1	0.2 ± 0.1			d-cadinene	tr	0.4 ± 0.1	0.3 ± 0.1			d-cadinene	tr	0.4 ± 0.1	0.2 ± 0.1
a-cadinene	tr	tr	tr			a-cadinene	tr	0.1 ± 0.02	tr			a-cadinene	tr	0.1 ± 0.02	tr			a-cadinene		0.1 ± 0.03	tr
