# Supplementary material for: Biochemical basis for the formation of organ-specific volatile blends in mint
Source: Front Plant Sci. 2023 Apr 14;14:1125065. doi: 10.3389/fpls.2023.1125065 (PMC10140540; doi:10.3389/fpls.2023.1125065)
Supplement: Supplementary Table 3 — Complete terpenoid profiles for the data sets included in Table 2>. [file Table_3.xlsx]

## Sheet: Peppermint
Leaf
BMPM - Greenhouse	Avg. %	Std. Error	1	2	3	4	5	6
a-thujene	0.122275	0.0554713	0.0850153	0.248273	0.0394686	0.333439	0.00948109	0.0179733
a-pinene	0.0286378	0.012046	0.0175415	0.0248753	0.0119342	0.0206342	0.00911377	0.0877281
camphene	0	0	0	0	0	0	0	0
sabinene	0.135443	0.0563274	0.1156	0.260544	0.0499852	0.347477	0.0179361	0.0211187
1-octen-3-ol	0.00572226	0.00211385	0.0149078	0.0048233	0.00613526	0.00663369	0.0018335	0
B-pinene	0.0493916	0.0163391	0.0451828	0.0474828	0.0203956	0.0332775	0.0222083	0.127803
3-octanone	0	0	0	0	0	0	0	0
myrcene	0.00911902	0.00284897	0.013476	0.0203255	0.00777546	0.0072612	0.00587598	0
3-octanol	0.0774828	0.0229858	0.0394722	0.115992	0.0396192	0.079536	0.168832	0.0214458
a-phellandrene	0.271742	0.0632626	0.0343304	0.253873	0.309245	0.195912	0.337551	0.499544
a-terpinene	0.612976	0.13043	0.151666	0.464145	0.700165	0.444154	0.962394	0.955329
p-cymene	0.160803	0.0734744	0.0222821	0.0596674	0.10364	0.056735	0.223255	0.499241
limonene	0.136164	0.0645333	0.0433117	0.0735483	0.11503	0.0856488	0.0452663	0.454179
1,8-cineole	0.224825	0.0433888	0.352371	0.315601	0.0596288	0.161363	0.212689	0.247295
y-terpinene	1.24288	0.273067	0.255754	0.980473	1.5126	0.956796	2.22068	1.531
trans-sabinene hydrate	0	0	0	0	0	0	0	0
terpinolene	0.230092	0.0498553	0.0568071	0.188151	0.308158	0.178548	0.414511	0.234376
linalool	0.0177567	0.00691481	0.0176338	0.0438565	0	0.016314	0.0287358	0
camphor	0	0	0	0	0	0	0	0
menthone	28.4942	2.93779	24.8734	30.4885	34.4057	17.1928	26.78	37.2248
pinocarvone	0	0	0	0	0	0	0	0
menthofuran	20.8715	5.00333	0.948684	14.0117	26.2438	27.2351	20.5059	36.2836
isomenthone	3.05574	0.313878	3.5427	3.48246	3.18691	1.60001	2.86393	3.65841
neomenthol	1.23661	0.381534	1.41982	1.94892	0.226687	0.904563	2.59919	0.320491
d-terpineol	0	0	0	0	0	0	0	0
borneol	0.573404	0.362956	0	1.41539	0.0452607	0	1.97977	0
trans-isopulegone	0.221894	0.118933	0	0.0645284	0.768368	0.27144	0	0.227029
menthol	20.6957	6.12283	40.6162	29.3256	1.3704	17.3344	28.9758	6.55204
terpinen-4-ol	0.113251	0.0873528	0	0	0.53341	0	0	0.146099
cis-isopulegone	0	0	0	0	0	0	0	0
isomenthol	0.0973757	0.0413318	0.185002	0.167737	0	0	0.213176	0.0183393
neoisomenthol	0.00606089	0.00295	0.0171155	0.0109022	0	0	0.00834763	0
a-terpineol	0.0941589	0.0385998	0	0.251105	0.153272	0.0796738	0.0698385	0.0110642
myrtenal	0	0	0	0	0	0	0	0
cis-dihydrocarvone	0	0	0	0	0	0	0	0
trans-dihydrocarvone	0	0	0	0	0	0	0	0
trans-carveol	0	0	0	0	0	0	0	0
cis-carveol	0	0	0	0	0	0	0	0
pulegone	14.8905	3.70178	15.6618	9.42298	22.6152	27.8444	3.33452	10.4642
carvone	0.00250517	0.00250517	0.015031	0	0	0	0	0
cis-piperitone oxide	0	0	0	0	0	0	0	0
piperitone	0.4838	0.226739	1.55799	0.451785	0.456954	0.0918651	0.311352	0.0328569
trans-piperitone oxide	0.0115071	0.00425923	0	0.0212769	0.0238671	0.0080252	0.0158731	0
isopiperitenone	0.0414253	0.0224134	0.142311	0.0258751	0.0652227	0.0137622	0.00138122	0
neo-menthyl acetate	0.00478707	0.00227261	0.0153291	0.00491973	0.000503258	0.00319871	0.00477159	0
bornyl acetate	0.000631917	0.000443112	0.0026369	0	0.0011546	0	0	0
menthyl acetate	0.237345	0.105261	0.740566	0.229582	0.00577296	0.120511	0.141247	0.186393
carvacrol	0.00405054	0.00272012	0.0156935	0	0.00860979	0	0	0
piperitenone	0.0256453	0.0145337	0.0814372	0.00394517	0.059641	0.00884836	0	0
piperitenone oxide	0.000187923	0.000187923	0	0	0.00112754	0	0	0
B-caryophyllene	0.778568	0.197715	0.814281	0.740169	0.923161	0.55322	1.56016	0.0804172
(E)-B-farnesene	1.02438	0.216424	1.56329	1.1551	1.18983	0.894926	1.30583	0.0373031
a-humulene	0.000966154	0.000698853	0.00421193	0	0	0.00158499	0	0
y-muurolene	0.356754	0.0841056	0.477617	0.333087	0.471317	0.260259	0.588921	0.00932486
germacrene D	2.06338	0.567524	4.34891	2.06926	2.30758	1.756	1.89855	0
bicyclogermacrene	0.0831011	0.028969	0.211246	0.103178	0.0639875	0.0634401	0.0567544	0
a-muurolene	0.13213	0.0349199	0.143462	0.12239	0.169641	0.0843777	0.264193	0.00871771
y-cadinene	0.32739	0.0735283	0.467065	0.345038	0.419077	0.243168	0.483004	0.00698982
d-cadinene	0.650984	0.163941	0.735161	0.601483	0.875857	0.439994	1.21852	0.0348849
a-cadinene	0.0947337	0.0215209	0.133763	0.101343	0.123964	0.0707443	0.138588	0
Stem
BMPM - Greenhouse	Avg. %	Std. Error	1	2	3	4	5	6
a-thujene	0.135953	0.0498266	0.0623377	0.35136	0.146927	0.0594705	0.180821	0.0147999
a-pinene	0.132573	0.0247649	0.0520255	0.166859	0.104779	0.147535	0.0988996	0.225338
camphene	0	0	0	0	0	0	0	0
sabinene	0.185247	0.0325806	0.0792742	0.268373	0.186673	0.0974277	0.243321	0.236411
1-octen-3-ol	1.97452	1.04029	0.065579	6.09186	0.924954	0.258302	4.21118	0.295227
B-pinene	0.220888	0.0385423	0.108168	0.238066	0.181476	0.204485	0.200944	0.392189
3-octanone	0.0149282	0.00836861	0	0.0432723	0.0388634	0.00743337	0	0
myrcene	0.0491338	0.0101666	0.0180374	0.0415585	0.0418915	0.0400712	0.0619491	0.0912953
3-octanol	0.675014	0.361736	0.0222851	1.4393	0.291308	0.125215	2.11751	0.0544593
a-phellandrene	0.0468668	0.0136957	0.0198222	0.0868472	0.0518296	0.0230017	0.0864924	0.0132074
a-terpinene	0.14575	0.0374483	0.059629	0.272259	0.158768	0.0631184	0.235281	0.0854467
p-cymene	0.0720386	0.0102278	0.0567139	0.0980925	0.0579218	0.0551714	0.109876	0.0544562
limonene	0.371052	0.0558073	0.298772	0.436978	0.365949	0.424918	0.149802	0.549893
1,8-cineole	0.976973	0.318106	0.208903	0.555828	1.08378	0.222375	1.88265	1.9083
y-terpinene	0.322043	0.0807171	0.155192	0.620936	0.348391	0.142375	0.482814	0.182549
trans-sabinene hydrate	0	0	0	0	0	0	0	0
terpinolene	0.0689552	0.0140877	0.0438764	0.125924	0.0687822	0.0388937	0.0923593	0.0438954
linalool	0.00487049	0.00487049	0	0	0	0	0.0292229	0
camphor	0.0100958	0.0035407	0	0.0135921	0.0162148	0.0211567	0.00961086	0
menthone	2.32138	1.16456	1.31654	0.106307	2.43495	0.177587	7.80819	2.0847
pinocarvone	0	0	0	0	0	0	0	0
menthofuran	77.2794	6.50241	92.4332	70.7636	84.0325	90.3001	49.3333	76.8134
isomenthone	0.474337	0.283668	0.125178	0.0438436	0.446583	0.0537622	1.85487	0.321789
neomenthol	0.340064	0.228853	0.081483	0.00772585	0.271149	0.0158592	1.46449	0.19968
d-terpineol	0	0	0	0	0	0	0	0
borneol	0.0053294	0.0053294	0	0.0319764	0	0	0	0
trans-isopulegone	0.0351188	0.0294084	0	0.180008	0	0.0307049	0	0
menthol	7.37649	4.35075	2.04212	0.10616	7.07573	0.364458	28.2656	6.40488
terpinen-4-ol	0.103083	0.0320195	0.223755	0.106266	0.0792932	0.0546477	0	0.154537
cis-isopulegone	0	0	0	0	0	0	0	0
isomenthol	0.0521981	0.0390249	0	0	0.0327085	0	0.244239	0.036241
neoisomenthol	0	0	0	0	0	0	0	0
a-terpineol	0.0042653	0.00195594	0	0.00688534	0.00406398	0.00218303	0.0124595	0
myrtenal	0.00339094	0.00339094	0	0.0203456	0	0	0	0
cis-dihydrocarvone	0	0	0	0	0	0	0	0
trans-dihydrocarvone	0	0	0	0	0	0	0	0
trans-carveol	0	0	0	0	0	0	0	0
cis-carveol	0	0	0	0	0	0	0	0
pulegone	6.33178	2.66559	2.38221	17.7235	1.48582	7.04418	0.299881	9.0551
carvone	0	0	0	0	0	0	0	0
cis-piperitone oxide	0	0	0	0	0	0	0	0
piperitone	0.0491167	0.0474237	0	0	0.0085684	0	0.286132	0
trans-piperitone oxide	0.00202859	0.00202859	0	0	0	0	0.0121715	0
isopiperitenone	0	0	0	0	0	0	0	0
neo-menthyl acetate	0.00409879	0.00409879	0	0	0	0	0	0.0245927
bornyl acetate	0	0	0	0	0	0	0	0
menthyl acetate	0.17353	0.118876	0.130619	0.0131065	0.0190218	0.00703524	0.113743	0.757653
carvacrol	0	0	0	0	0	0	0	0
piperitenone	0	0	0	0	0	0	0	0
piperitenone oxide	0	0	0	0	0	0	0	0
B-caryophyllene	0.0122834	0.00384797	0.0118431	0.013561	0.0107243	0.00867411	0.0288979	0
(E)-B-farnesene	0.00953617	0.00389814	0	0.0148315	0.0108387	0.0066508	0.024896	0
a-humulene	0	0	0	0	0	0	0	0
y-muurolene	0.00213389	0.00152352	0	0	0.00366377	0	0.00913954	0
germacrene D	0.00653512	0.00414343	0	0.00554755	0.0075067	0	0.0261565	0
bicyclogermacrene	0	0	0	0	0	0	0	0
a-muurolene	0	0	0	0	0	0	0	0
y-cadinene	0.00176574	0.00129291	0	0	0.00277387	0	0.00782054	0
d-cadinene	0.00527994	0.00216665	0.00239011	0.00523382	0.00559902	0.0031737	0.015283	0
a-cadinene	0	0	0	0	0	0	0	0
Rhizome
BMPM - Greenhouse	Avg. %	Std. Error	1	2	3	4	5	6
a-thujene	0.0662032	0.0246022	0.0423635	0.18618	0.0258982	0.0615577	0.0296704	0.0515496
a-pinene	0.1058	0.0173546	0.132289	0.151101	0.121126	0.118887	0.0763719	0.0350223
camphene	0.00041676	0.00041676	0.00250056	0	0	0	0	0
sabinene	0.0991865	0.0181492	0.100316	0.180267	0.0704274	0.110911	0.056157	0.0770404
1-octen-3-ol	0.36889	0.168321	0.0997573	1.0564	0.0566666	0.683613	0.0590877	0.257815
B-pinene	0.163216	0.0213192	0.2037	0.207651	0.180255	0.182601	0.134115	0.0709727
3-octanone	0.0262347	0.00682001	0.0259571	0.0507248	0.0406689	0.0210659	0.00970518	0.0092863
myrcene	0.0410269	0.00431587	0.0468988	0.0552782	0.0471461	0.0363845	0.0264226	0.0340312
3-octanol	0.140915	0.0619024	0.0925111	0.425487	0.0364909	0.191355	0.0216319	0.0780171
a-phellandrene	0.0158737	0.00622529	0.00816172	0.0463253	0.00847623	0.0113711	0.00586521	0.015043
a-terpinene	0.0516734	0.0184255	0.027994	0.140629	0.0262453	0.0442797	0.0199021	0.0509898
p-cymene	0.046194	0.00692091	0.0322883	0.0673071	0.0337982	0.0683221	0.0353733	0.0400751
limonene	0.679628	0.171581	0.433846	0.815345	1.0633	0.367325	0.170349	1.2276
1,8-cineole	0.086782	0.0259356	0.0416003	0.104483	0.0259773	0.199545	0.0981301	0.0509566
y-terpinene	0.126882	0.0393129	0.0705798	0.314269	0.0765723	0.118154	0.0529197	0.128795
trans-sabinene hydrate	0.00966304	0.00966304	0.0579782	0	0	0	0	0
terpinolene	0.0466	0.0128762	0.0395242	0.110376	0.0298505	0.0368653	0.0279769	0.0350077
linalool	0.000755635	0.000755635	0	0.00453381	0	0	0	0
camphor	0.00785187	0.00233789	0.0168652	0.00721005	0.00644773	0.00526883	0.0113194	0
menthone	1.0083	0.703348	0.0904374	0.754569	0.172061	0.42978	0.115652	4.48728
pinocarvone	0	0	0	0	0	0	0	0
menthofuran	86.6989	3.94402	93.772	74.4838	90.7938	92.2065	94.7248	74.2127
isomenthone	0.429782	0.334765	0.0491266	0.260458	0.0595663	0.0953628	0.0196586	2.09452
neomenthol	0.0847637	0.032774	0.0425951	0.205669	0.0216924	0.0328469	0.0377074	0.168072
d-terpineol	0	0	0	0	0	0	0	0
borneol	0.030138	0.013794	0.0883487	0	0.013068	0.0434941	0.0359171	0
trans-isopulegone	0.0558475	0.0444711	0	0.0628935	0	0	0	0.272192
menthol	1.1004	0.391767	0.48543	3.02277	0.658342	0.834846	0.594412	1.0066
terpinen-4-ol	0.0418388	0.00806574	0.0316698	0.0506005	0.0147086	0.0453587	0.0355044	0.0731907
cis-isopulegone	0	0	0	0	0	0	0	0
isomenthol	0.00945859	0.00412671	0.0127121	0.0282189	0.00456402	0.00395584	0	0.00730071
neoisomenthol	0	0	0	0	0	0	0	0
a-terpineol	0.00230254	0.0011541	0.00361149	0.00692773	0	0.00327599	0	0
myrtenal	0.00230849	0.00230849	0	0	0	0	0	0.0138509
cis-dihydrocarvone	0	0	0	0	0	0	0	0
trans-dihydrocarvone	0	0	0	0	0	0	0	0
trans-carveol	0	0	0	0	0	0	0	0
cis-carveol	0	0	0	0	0	0	0	0
pulegone	5.92906	2.59555	2.48709	12.8935	0.0926054	3.80182	1.31942	14.9799
carvone	0	0	0	0	0	0	0	0
cis-piperitone oxide	0	0	0	0	0	0	0	0
piperitone	0.00818982	0.00540814	0	0.0141355	0.0022137	0	0	0.0327898
trans-piperitone oxide	0	0	0	0	0	0	0	0
isopiperitenone	0.0020773	0.0020773	0	0	0	0	0	0.0124638
neo-menthyl acetate	0.172016	0.0596195	0.1714	0.265719	0.402028	0.0145536	0.145924	0.0324701
bornyl acetate	0.00613487	0.00139595	0.00787564	0.00985177	0.00480266	0	0.00744307	0.00683611
menthyl acetate	2.2696	0.908417	1.21985	3.88821	5.88489	0.172353	2.05932	0.392962
carvacrol	0	0	0	0	0	0	0	0
piperitenone	0.000783889	0.000783889	0	0	0	0	0	0.00470334
piperitenone oxide	0	0	0	0	0	0	0	0
B-caryophyllene	0.01854	0.00162885	0.0172976	0.0182839	0.0169791	0.023196	0.02287	0.0126137
(E)-B-farnesene	0.0240721	0.00979565	0.0280502	0.06825	0	0.00890152	0.0251742	0.014057
a-humulene	0	0	0	0	0	0	0	0
y-muurolene	0.00295908	0.00109727	0	0.00612415	0	0.00505518	0.00469838	0.00187675
germacrene D	0.0095687	0.00248667	0.0104743	0.0174965	0	0.0138215	0.00954238	0.0060775
bicyclogermacrene	0	0	0	0	0	0	0	0
a-muurolene	0	0	0	0	0	0	0	0
y-cadinene	0.00169055	0.000959667	0.00222798	0.00601758	0	0	0	0.00189774
d-cadinene	0.00746189	0.00138516	0.00464152	0.0129424	0.00930974	0.00740987	0.00699802	0.0034698
a-cadinene	0	0	0	0	0	0	0	0
Root
BMPM - Greenhouse	Avg. %	Std. Error	1	2	3	4	5	6
a-thujene	0.0274464	0.0274464	0	0.164679	0	0	0	0
a-pinene	0.364545	0.185836	0	0.41297	1.09786	0.676447	0	0
camphene	0	0	0	0	0	0	0	0
sabinene	0.147706	0.103264	0	0.272675	0	0	0.613561	0
1-octen-3-ol	0.746927	0.383824	1.63438	0.265731	0	0	2.21085	0.370603
B-pinene	0.362838	0.16685	0	0.580682	0.715318	0.881027	0	0
3-octanone	1.04992	0.988327	0	0.314662	0	0	5.98487	0
myrcene	0.295718	0.125197	0.760567	0.163931	0	0	0.544281	0.305526
3-octanol	0.212809	0.192649	0	0.104592	0	0	1.17226	0
a-phellandrene	0.00959593	0.00959593	0	0.0575756	0	0	0	0
a-terpinene	0.865781	0.41516	2.80616	0.177491	0.397169	0.0764427	1.07998	0.657445
p-cymene	1.94881	0.88629	5.95815	0.368581	0.675577	0.272024	2.67021	1.74833
limonene	1.11252	0.230473	0.673716	2.19989	1.16663	0.905559	1.02278	0.706557
1,8-cineole	0.851476	0.275716	1.46511	0.424511	0.369787	0.159972	1.85705	0.832431
y-terpinene	1.60524	0.702988	4.7921	0.447267	0.898891	0.130439	2.24847	1.11428
trans-sabinene hydrate	0	0	0	0	0	0	0	0
terpinolene	1.10385	0.512269	3.55337	0.252031	1.17031	0.167834	0.764219	0.71533
linalool	0	0	0	0	0	0	0	0
camphor	4.50477	1.74894	12.2893	0.566364	0.767635	4.55374	3.51147	5.34008
menthone	3.19726	1.14979	2.62608	4.76686	2.58394	0.363282	7.98996	0.853468
pinocarvone	0	0	0	0	0	0	0	0
menthofuran	52.465	8.43891	30.4631	61.2406	53.3113	77.6328	25.3411	66.801
isomenthone	0.937975	0.321685	1.10721	0.988231	0.252064	0.259294	2.37266	0.648382
neomenthol	0.0140142	0.0140142	0	0.0840855	0	0	0	0
d-terpineol	0	0	0	0	0	0	0	0
borneol	11.1816	3.46042	11.9392	3.33318	25.7445	2.14948	13.0083	10.9149
trans-isopulegone	0	0	0	0	0	0	0	0
menthol	5.82796	2.23312	8.75204	3.09009	4.6014	0.449902	15.4611	2.61326
terpinen-4-ol	0.94455	0.430859	2.72866	0.317679	0.00642652	0.106904	1.58559	0.922035
cis-isopulegone	0	0	0	0	0	0	0	0
isomenthol	0	0	0	0	0	0	0	0
neoisomenthol	0	0	0	0	0	0	0	0
a-terpineol	0.539976	0.177584	1.08639	0.568862	0	0.101526	0.943542	0.539535
myrtenal	0	0	0	0	0	0	0	0
cis-dihydrocarvone	0	0	0	0	0	0	0	0
trans-dihydrocarvone	0	0	0	0	0	0	0	0
trans-carveol	0	0	0	0	0	0	0	0
cis-carveol	0	0	0	0	0	0	0	0
pulegone	4.49684	1.50717	4.97678	9.42235	0.459594	1.45116	8.22287	2.4483
carvone	0	0	0	0	0	0	0	0
cis-piperitone oxide	0	0	0	0	0	0	0	0
piperitone	0	0	0	0	0	0	0	0
trans-piperitone oxide	0	0	0	0	0	0	0	0
isopiperitenone	0.102938	0.102938	0	0	0	0	0.617627	0
neo-menthyl acetate	0.313295	0.10712	0	0.643283	0.350374	0.487722	0	0.398389
bornyl acetate	0	0	0	0	0	0	0	0
menthyl acetate	4.64835	1.41407	2.38759	8.48976	5.26097	8.90431	0.777341	2.07012
carvacrol	0	0	0	0	0	0	0	0
piperitenone	0	0	0	0	0	0	0	0
piperitenone oxide	0	0	0	0	0	0	0	0
B-caryophyllene	0.0825045	0.0396628	0	0.106185	0.170318	0.218523	0	0
(E)-B-farnesene	0	0	0	0	0	0	0	0
a-humulene	0	0	0	0	0	0	0	0
y-muurolene	0	0	0	0	0	0	0	0
germacrene D	0.0108209	0.0108209	0	0.0649257	0	0	0	0
bicyclogermacrene	0	0	0	0	0	0	0	0
a-muurolene	0	0	0	0	0	0	0	0
y-cadinene	0.00839609	0.00839609	0	0.0503766	0	0	0	0
d-cadinene	0.0185884	0.0118042	0	0.0598781	0	0.0516524	0	0
a-cadinene	0	0	0	0	0	0	0	0

## Sheet: Spearmint
Leaf
NSM - Greenhouse	Avg. %	Std. Error	1	2	3	4	5	6
a-thujene	0.074834	0.0207364	0.0627965	0.0490504	0.0634649	0.0467628	0.17745	0.049479
a-pinene	0.065702	0.0318096	0.207177	0.00736041	0.0219878	0.022473	0.027922	0.107292
camphene	0	0	0	0	0	0	0	0
sabinene	0.094646	0.017554	0.073258	0.0588671	0.0943816	0.0731714	0.178441	0.0897573
1-octen-3-ol	0.00346075	0.00187866	0	0.00157717	0.00397207	0.00293193	0	0.0122833
B-pinene	0.0713999	0.030483	0.200583	0.00986918	0.0315468	0.0334992	0.0299407	0.12296
3-octanone	0.117239	0.113913	0.686692	0.000574353	0.00176507	0	0	0.0144012
myrcene	0.443698	0.132067	0.835694	0.095194	0.24931	0.28565	0.335825	0.860513
3-octanol	0.746163	0.155132	0.283812	0.431423	0.778256	0.664685	1.33253	0.986268
a-phellandrene	0.155096	0.0755359	0.524621	0.0777789	0.035498	0.0565439	0.0873649	0.148769
a-terpinene	0.484182	0.240688	1.56944	0.164169	0.0997734	0.175231	0.122719	0.77376
p-cymene	0.144037	0.0877544	0.526606	0.01978	0.0110062	0.0193639	0.00959552	0.277869
limonene	0.361541	0.170211	1.13728	0.0655544	0.147373	0.264318	0.0425434	0.512176
1,8-cineole	0.0645321	0.0116932	0.0932166	0.0363078	0.0907076	0.065737	0.0240756	0.0771478
y-terpinene	0.934038	0.331455	2.33101	0.368989	0.224678	0.406537	0.852234	1.42078
trans-sabinene hydrate	0.105991	0.0384224	0	0.107741	0.190172	0.110769	0.227267	0
terpinolene	0.157008	0.0456731	0.34714	0.0736923	0.0537781	0.0901236	0.154332	0.22298
linalool	0.0241127	0.0125437	0	0.0286601	0.039875	0.0761411	0	0
camphor	0	0	0	0	0	0	0	0
menthone	0	0	0	0	0	0	0	0
pinocarvone	0.0143701	0.00429546	0	0.0144933	0.0250503	0.0232796	0.00335311	0.0200442
menthofuran	0	0	0	0	0	0	0	0
isomenthone	0	0	0	0	0	0	0	0
neomenthol	0	0	0	0	0	0	0	0
d-terpineol	0.00213458	0.00213458	0	0	0.0128075	0	0	0
borneol	0.0076029	0.0044189	0	0.0240283	0	0	0.00297719	0.018612
trans-isopulegone	0	0	0	0	0	0	0	0
menthol	0	0	0	0	0	0	0	0
terpinen-4-ol	0.111663	0.0385617	0	0.146149	0.128594	0.238973	0	0.156263
cis-isopulegone	0	0	0	0	0	0	0	0
isomenthol	0	0	0	0	0	0	0	0
neoisomenthol	0	0	0	0	0	0	0	0
a-terpineol	0.00124263	0.00124263	0	0	0	0.00745578	0	0
myrtenal	0	0	0	0	0	0	0	0
cis-dihydrocarvone	0.478875	0.0887819	0.660934	0.277996	0.375313	0.265371	0.488309	0.805326
trans-dihydrocarvone	0.15251	0.117372	0.738679	0.0373641	0.0199484	0.0274551	0.0308184	0.060795
trans-carveol	0	0	0	0	0	0	0	0
cis-carveol	0	0	0	0	0	0	0	0
pulegone	0	0	0	0	0	0	0	0
carvone	79.823	2.12832	81.3484	74.2018	81.4254	73.6481	80.7145	87.5996
cis-piperitone oxide	0	0	0	0	0	0	0	0
piperitone	0.169498	0.0444098	0	0.263653	0.281789	0.166179	0.217439	0.0879279
trans-piperitone oxide	0	0	0	0	0	0	0	0
isopiperitenone	0.0269153	0.00924182	0	0.0359597	0.0560919	0.0293085	0.0401314	0
neo-menthyl acetate	0	0	0	0	0	0	0	0
bornyl acetate	0.000349988	0.000349988	0	0	0.00209993	0	0	0
menthyl acetate	0	0	0	0	0	0	0	0
carvacrol	0.00456764	0.00223685	0	0.00586917	0.008656	0.0128807	0	0
piperitenone	0	0	0	0	0	0	0	0
piperitenone oxide	0	0	0	0	0	0	0	0
B-caryophyllene	1.22013	0.178368	0.666687	1.25217	0.937131	1.89068	1.51992	1.05422
(E)-B-farnesene	4.0038	0.483247	4.70115	5.21312	3.76079	4.84533	3.51007	1.99231
a-humulene	0.0185913	0.0120572	0	0	0	0.0661103	0	0.0454373
y-muurolene	0.715982	0.136747	0.420624	1.05696	0.582906	1.17252	0.709282	0.353606
germacrene D	7.04845	2.32223	0	12.3542	8.41909	13.5308	7.26311	0.723501
bicyclogermacrene	0.00107693	0.00107693	0	0	0	0	0	0.0064616
a-muurolene	0.247376	0.037253	0.305533	0.349585	0.17827	0.332552	0.14892	0.169398
y-cadinene	0.615624	0.126761	0.360541	0.93217	0.484338	1.05563	0.567332	0.293735
d-cadinene	1.11181	0.292947	1.82492	1.96573	1.00679	-0.00874961	1.01808	0.8641
a-cadinene	0.176783	0.0379947	0.0931624	0.272151	0.157409	0.302247	0.163473	0.0722527
Stem
NSM - Greenhouse	Avg. %	Std. Error	1	2	3	4	5	6
a-thujene	0.0832397	0.0160421	0.0469933	0.0564326	0.076544	0.0593657	0.111469	0.148633
a-pinene	0.163539	0.0406926	0.0866485	0.100678	0.272262	0.0544336	0.177618	0.289595
camphene	0	0	0	0	0	0	0	0
sabinene	0.189216	0.0372557	0.128206	0.107092	0.198809	0.104418	0.303625	0.293144
1-octen-3-ol	0.0672968	0.0202056	0.0386481	0	0.12724	0.0927106	0.108669	0.0365127
B-pinene	0.239123	0.0484195	0.138484	0.204232	0.323804	0.0828066	0.288282	0.397128
3-octanone	0.0366967	0.0151805	0.0429816	0	0	0.0200578	0.064481	0.0926595
myrcene	1.21945	0.191432	0.926535	0.896941	1.23911	0.718549	1.59905	1.93652
3-octanol	0.297467	0.0916612	0.213688	0	0.466206	0.446024	0.557433	0.101448
a-phellandrene	0.0441355	0.0143751	0.0237797	0	0.105842	0.0427338	0.0492766	0.0431811
a-terpinene	0.093805	0.0170389	0.0524349	0.0484426	0.14114	0.073705	0.107339	0.139769
p-cymene	0.23888	0.0473012	0.0955744	0.268638	0.411367	0.133514	0.305502	0.218684
limonene	2.33606	0.452517	1.34292	2.34922	2.9787	0.920367	2.43705	3.98811
1,8-cineole	0.993656	0.23362	0.595308	1.5018	1.40764	0.143045	0.788203	1.52594
y-terpinene	0.201668	0.0305094	0.116505	0.155799	0.227549	0.14999	0.241805	0.318358
trans-sabinene hydrate	0.0547854	0.0160773	0.0605812	0.0363211	0	0.0660927	0.119426	0.0462912
terpinolene	0.0594584	0.00727838	0.0385925	0.0534987	0.0656057	0.0430432	0.0701587	0.0858515
linalool	0.0353609	0.00900137	0.0213888	0	0.0416202	0.0454306	0.0641087	0.0396169
camphor	0.047719	0.0133101	0.0348579	0.0666662	0.0922624	0.00641847	0.0200657	0.0660435
menthone	0	0	0	0	0	0	0	0
pinocarvone	0.0178929	0.00396477	0.0138358	0.0238799	0.0306225	0.00752367	0.00736593	0.0241296
menthofuran	0	0	0	0	0	0	0	0
isomenthone	0	0	0	0	0	0	0	0
neomenthol	0	0	0	0	0	0	0	0
d-terpineol	0.00801181	0.00402503	0.0122084	0	0	0.011644	0.0242184	0
borneol	0.0225839	0.00714222	0.0192236	0.0519379	0	0.013226	0.0209698	0.030146
trans-isopulegone	0	0	0	0	0	0	0	0
menthol	0	0	0	0	0	0	0	0
terpinen-4-ol	0.108799	0.0220464	0.0355187	0.100991	0.0932184	0.0813305	0.155891	0.185841
cis-isopulegone	0	0	0	0	0	0	0	0
isomenthol	0	0	0	0	0	0	0	0
neoisomenthol	0	0	0	0	0	0	0	0
a-terpineol	0.00512398	0.00265441	0.00739886	0	0	0.00710801	0.016237	0
myrtenal	0	0	0	0	0	0	0	0
cis-dihydrocarvone	1.33181	0.253928	0.715914	0.450275	1.38665	1.82878	2.00572	1.60349
trans-dihydrocarvone	0.119688	0.0228361	0.0495015	0.0777807	0.0906599	0.137662	0.191603	0.17092
trans-carveol	3.49725	1.25852	1.26538	1.52444	4.13565	8.46843	5.29837	0.291216
cis-carveol	0.0277106	0.00771365	0	0.0246828	0.0374765	0.0526612	0.0375989	0.0138439
pulegone	0	0	0	0	0	0	0	0
carvone	88.0099	1.50448	93.6239	91.3846	85.7894	85.7885	84.1881	87.2846
cis-piperitone oxide	0	0	0	0	0	0	0	0
piperitone	0.0470146	0.0221317	0.0649949	0	0	0.1177	0.0993929	0
trans-piperitone oxide	0	0	0	0	0	0	0	0
isopiperitenone	0.0209126	0.0132272	0	0	0	0.0621407	0.0633346	0
neo-menthyl acetate	0	0	0	0	0	0	0	0
bornyl acetate	0	0	0	0	0	0	0	0
menthyl acetate	0	0	0	0	0	0	0	0
carvacrol	0.00920816	0.00433254	0	0	0	0.0233666	0.0129723	0.0189101
piperitenone	0	0	0	0	0	0	0	0
piperitenone oxide	0	0	0	0	0	0	0	0
B-caryophyllene	0.048867	0.0123798	0.020416	0.0835031	0.0398702	0.0158815	0.0470303	0.086501
(E)-B-farnesene	0.100361	0.0179643	0.0316399	0.114492	0.0860477	0.0789072	0.147965	0.143115
a-humulene	0	0	0	0	0	0	0	0
y-muurolene	0.0356458	0.00906007	0.0190893	0.0648113	0.0238408	0.0107723	0.0356373	0.0597239
germacrene D	0.0880682	0.013791	0.0676765	0.0871094	0.0596266	0.0556043	0.133845	0.124547
bicyclogermacrene	0	0	0	0	0	0	0	0
a-muurolene	0.0146993	0.00541159	0.00957059	0.0329249	0	0.00426265	0.0128886	0.0285489
y-cadinene	0.0227076	0.00761108	0.0128772	0.0421755	0	0.00977246	0.0247301	0.0466905
d-cadinene	0.0576058	0.0140472	0.026688	0.0906046	0.0512323	0.0182263	0.0536548	0.105229
a-cadinene	0.00462545	0.00253131	0	0	0	0.003756	0.00895159	0.0150451
Rhizome
NSM - Greenhouse	Avg. %	Std. Error	1	2	3	4	5	6
a-thujene	0.0609978	0.0439657	0	0	0.264666	0.101321	0	0
a-pinene	0.290763	0.135885	0.883225	0	0.436432	0.199076	0	0.225842
camphene	0	0	0	0	0	0	0	0
sabinene	0.13974	0.0539947	0.307709	0	0.279226	0.138921	0	0.112581
1-octen-3-ol	0.0349554	0.0174991	0	0	0.0767887	0.0963412	0	0.0366027
B-pinene	0.328985	0.173723	1.12782	0	0.45355	0.201503	0	0.191039
3-octanone	0.320035	0.113533	0.522928	0	0.439998	0.28373	0	0.673552
myrcene	0.55303	0.189491	1.08234	0	0.962121	0.592471	0	0.681248
3-octanol	0.257466	0.0809595	0.298154	0	0.10906	0.581774	0.259831	0.29598
a-phellandrene	0.00985259	0.00985259	0	0	0	0.0591155	0	0
a-terpinene	0.0424155	0.0283791	0	0	0.091383	0.16311	0	0
p-cymene	3.84888	2.56827	1.30045	16.6551	1.75809	0.441592	1.27369	1.66429
limonene	11.6704	8.63385	3.85766	54.7567	4.94725	1.99278	1.2618	3.20638
1,8-cineole	0.423679	0.282334	0.540026	1.77711	0.107566	0.0685377	0	0.0488324
y-terpinene	0.0937076	0.0512264	0	0	0.222463	0.27988	0	0.0599025
trans-sabinene hydrate	0.00822404	0.00822404	0	0	0	0.0493443	0	0
terpinolene	0.0223487	0.0109608	0	0	0.0533558	0.0560995	0	0.0246369
linalool	0	0	0	0	0	0	0	0
camphor	0.588366	0.522341	0	3.19624	0.178919	0.11118	0	0.0438565
menthone	0	0	0	0	0	0	0	0
pinocarvone	0.122041	0.0555185	0.371578	0	0.121225	0.13388	0	0.105566
menthofuran	0	0	0	0	0	0	0	0
isomenthone	0	0	0	0	0	0	0	0
neomenthol	0	0	0	0	0	0	0	0
d-terpineol	0	0	0	0	0	0	0	0
borneol	1.32603	1.11009	0.661294	6.85662	0.13786	0.10441	0.195993	0
trans-isopulegone	0	0	0	0	0	0	0	0
menthol	0	0	0	0	0	0	0	0
terpinen-4-ol	0.0191028	0.0191028	0	0	0	0.114617	0	0
cis-isopulegone	0	0	0	0	0	0	0	0
isomenthol	0	0	0	0	0	0	0	0
neoisomenthol	0	0	0	0	0	0	0	0
a-terpineol	0	0	0	0	0	0	0	0
myrtenal	0	0	0	0	0	0	0	0
cis-dihydrocarvone	3.05672	0.889557	2.18145	0	3.94103	2.9122	6.61901	2.68664
trans-dihydrocarvone	0.297792	0.107819	0.149149	0	0.320844	0.16327	0.755235	0.398255
trans-carveol	0.795405	0.317806	0.578834	0	0.16324	0.836739	2.17327	1.02035
cis-carveol	0.0511338	0.0386836	0	0	0	0.0350201	0.241772	0.0300108
pulegone	0	0	0	0	0	0	0	0
carvone	75.5515	11.7834	86.1374	16.7582	84.756	90.2407	87.1354	88.2814
cis-piperitone oxide	0	0	0	0	0	0	0	0
piperitone	0.0070631	0.0070631	0	0	0	0.0423786	0	0
trans-piperitone oxide	0	0	0	0	0	0	0	0
isopiperitenone	0.0495062	0.035471	0	0	0	0	0.0839611	0.213076
neo-menthyl acetate	0	0	0	0	0	0	0	0
bornyl acetate	0	0	0	0	0	0	0	0
menthyl acetate	0	0	0	0	0	0	0	0
carvacrol	0	0	0	0	0	0	0	0
piperitenone	0	0	0	0	0	0	0	0
piperitenone oxide	0	0	0	0	0	0	0	0
B-caryophyllene	0.0098256	0.0098256	0	0	0.0589536	0	0	0
(E)-B-farnesene	0	0	0	0	0	0	0	0
a-humulene	0	0	0	0	0	0	0	0
y-muurolene	0	0	0	0	0	0	0	0
germacrene D	0.0112695	0.0112695	0	0	0.0676171	0	0	0
bicyclogermacrene	0	0	0	0	0	0	0	0
a-muurolene	0	0	0	0	0	0	0	0
y-cadinene	0	0	0	0	0	0	0	0
d-cadinene	0.00872327	0.00872327	0	0	0.0523396	0	0	0
a-cadinene	0	0	0	0	0	0	0	0
Root
NSM - Greenhouse	Avg. %	Std. Error	1	2	3	4	5	6
a-thujene	0.132949	0.132949	0.797691	0	0	0	0	0
a-pinene	1.07256	0.730608	4.26863	2.16675	0	0	0	0
camphene	0	0	0	0	0	0	0	0
sabinene	0.346576	0.346576	2.07946	0	0	0	0	0
1-octen-3-ol	1.85079	0.69696	0.602224	0	3.25002	4.49924	1.08811	1.66514
B-pinene	1.15693	0.667409	4.04741	2.0891	0	0	0	0.805063
3-octanone	16.3446	6.74021	0	3.39657	32.8686	8.37009	40.4337	12.9984
myrcene	6.0879	3.05771	20.7071	3.16459	3.56072	6.78639	0	2.30857
3-octanol	0.55542	0.37165	0	0	0	0	2.13627	1.19625
a-phellandrene	0	0	0	0	0	0	0	0
a-terpinene	0.666631	0.213012	0	0.971478	0.987552	0	1.1349	0.905859
p-cymene	6.91997	2.89945	0.406536	7.3365	20.6941	4.24065	4.095	4.74703
limonene	15.7169	7.34726	44.5821	32.0267	7.01566	4.03534	2.7044	3.93706
1,8-cineole	0.386407	0.166459	0.0613289	0.862382	0	0	0.756599	0.638131
y-terpinene	1.20182	0.550296	0	2.92837	0	0	2.08877	2.19378
trans-sabinene hydrate	0	0	0	0	0	0	0	0
terpinolene	0.135362	0.0894178	0.506067	0	0	0	0.306102	0
linalool	0	0	0	0	0	0	0	0
camphor	3.74021	1.10409	1.13045	1.41612	4.27018	7.19059	6.63746	1.7965
menthone	0	0	0	0	0	0	0	0
pinocarvone	5.62175	1.41685	0	6.76269	10.249	5.25582	7.42697	4.03605
menthofuran	0	0	0	0	0	0	0	0
isomenthone	0	0	0	0	0	0	0	0
neomenthol	0	0	0	0	0	0	0	0
d-terpineol	0	0	0	0	0	0	0	0
borneol	6.52635	2.44587	0	7.69091	4.14487	6.66654	17.4315	3.22424
trans-isopulegone	0.0558715	0.0558715	0	0	0	0	0.335229	0
menthol	0	0	0	0	0	0	0	0
terpinen-4-ol	0.467244	0.321558	0	0	0	0	1.89274	0.910728
cis-isopulegone	0	0	0	0	0	0	0	0
isomenthol	0	0	0	0	0	0	0	0
neoisomenthol	0	0	0	0	0	0	0	0
a-terpineol	0	0	0	0	0	0	0	0
myrtenal	0.331692	0.223486	0	0.696618	0	0	1.29353	0
cis-dihydrocarvone	3.75503	1.70491	0.680483	5.78061	1.33831	3.64812	0	11.0826
trans-dihydrocarvone	0.54334	0.356284	0	1.9944	0	0	0	1.26564
trans-carveol	0	0	0	0	0	0	0	0
cis-carveol	0	0	0	0	0	0	0	0
pulegone	0	0	0	0	0	0	0	0
carvone	24.7073	6.45991	19.4258	18.8101	11.621	48.5779	9.93622	39.8731
cis-piperitone oxide	0	0	0	0	0	0	0	0
piperitone	0	0	0	0	0	0	0	0
trans-piperitone oxide	0	0	0	0	0	0	0	0
isopiperitenone	1.13225	0.812971	0	1.90614	0	0	0	4.88735
neo-menthyl acetate	0	0	0	0	0	0	0	0
bornyl acetate	0.12156	0.12156	0	0	0	0.729361	0	0
menthyl acetate	0	0	0	0	0	0	0	0
carvacrol	0	0	0	0	0	0	0	0
piperitenone	0	0	0	0	0	0	0	0
piperitenone oxide	0	0	0	0	0	0	0	0
B-caryophyllene	0.156517	0.156517	0	0	0	0	0	0.9391
(E)-B-farnesene	0	0	0	0	0	0	0	0
a-humulene	0	0	0	0	0	0	0	0
y-muurolene	0.0175937	0.0175937	0.105562	0	0	0	0	0
germacrene D	0.0570227	0.0570227	0.342136	0	0	0	0	0
bicyclogermacrene	0	0	0	0	0	0	0	0
a-muurolene	0	0	0	0	0	0	0	0
y-cadinene	0	0	0	0	0	0	0	0
d-cadinene	0.191484	0.0974556	0.257045	0	0	0	0.302498	0.589362
a-cadinene	0	0	0	0	0	0	0	0

## Sheet: M.longifoliaCMEN585
Leaf
CMEN 585.001 - Greenhouse	Avg. %	0.763763	1	2	3	4	5	6
a-thujene	0.00362048	0.000479552	0.00527205	0.00216087	0.00473151	0.00278834	0.00334475	0.00342536
a-pinene	0.0125834	0.00269029	0.00671817	0.0099654	0.0204037	0.00557242	0.0121705	0.02067
camphene	0.0059178	0.00148333	0.0026146	0.00462639	0.00923724	0.00214744	0.00565972	0.0112214
sabinene	0.0261147	0.00579042	0.0138608	0.0263992	0.0493637	0.0130964	0.018495	0.035473
1-octen-3-ol	0	0	0	0	0	0	0	0
B-pinene	0.0513995	0.0117753	0.0270439	0.0476979	0.0972894	0.0247461	0.0371335	0.0744863
3-octanone	4.86445e-05	4.86445e-05	0	0	0.000291867	0	0	0
myrcene	0.0254217	0.00540506	0.0100091	0.032891	0.0421937	0.0127684	0.0191372	0.035531
3-octanol	0.131786	0.0105968	0.128445	0.141827	0.158811	0.0837884	0.146694	0.131149
a-phellandrene	0.00497473	0.00190759	0	0.00880234	0	0.00360252	0.0114656	0.00597791
a-terpinene	0.0125037	0.00169067	0.0119455	0.0152395	0.00761314	0.00777462	0.0176356	0.0148137
p-cymene	0.0456003	0.00551827	0.0589698	0.0439825	0.0313724	0.0314909	0.0637198	0.0440666
limonene	0.120401	0.0193633	0.0667582	0.119762	0.14487	0.0610019	0.153529	0.176488
1,8-cineole	0.368793	0.0827921	0.123896	0.479061	0.685908	0.214799	0.288136	0.420957
y-terpinene	0.0271597	0.00387428	0.024283	0.034718	0.0163061	0.0162314	0.0365629	0.034857
trans-sabinene hydrate	0.0274877	0.0100758	0.0374406	0.00417773	0.0668577	0.0391588	0.0105131	0.00677853
terpinolene	0.0182848	0.00206471	0.0129017	0.0237278	0.0203391	0.0112558	0.0194037	0.0220807
linalool	0.31972	0.0313304	0.18899	0.297999	0.329041	0.354955	0.422332	0.325006
camphor	0	0	0	0	0	0	0	0
menthone	0.0768239	0.0205737	0.0295248	0.100007	0.16399	0.0341227	0.0544988	0.0787999
pinocarvone	0	0	0	0	0	0	0	0
menthofuran	0.0321441	0.00351385	0.0386719	0.020755	0.0310354	0.0259744	0.0447373	0.0316906
isomenthone	1.13154	0.389307	0.480472	1.14601	3.0102	0.504567	0.749599	0.898383
neomenthol	0	0	0	0	0	0	0	0
d-terpineol	0	0	0	0	0	0	0	0
borneol	0.409095	0.101805	0.683615	0.225268	0.220956	0.289479	0.771116	0.264138
trans-isopulegone	0	0	0	0	0	0	0	0
menthol	0	0	0	0	0	0	0	0
terpinen-4-ol	0	0	0	0	0	0	0	0
cis-isopulegone	0	0	0	0	0	0	0	0
isomenthol	0	0	0	0	0	0	0	0
neoisomenthol	0	0	0	0	0	0	0	0
a-terpineol	1.26743	0.29279	0.902516	1.44574	2.01898	1.73798	1.48604	0.0133174
myrtenal	0	0	0	0	0	0	0	0
cis-dihydrocarvone	0	0	0	0	0	0	0	0
trans-dihydrocarvone	0	0	0	0	0	0	0	0
trans-carveol	0	0	0	0	0	0	0	0
cis-carveol	0	0	0	0	0	0	0	0
pulegone	83.9823	2.02235	89.8579	83.2075	77.9364	78.5251	87.7935	86.5734
carvone	0	0	0	0	0	0	0	0
cis-piperitone oxide	0	0	0	0	0	0	0	0
piperitone	0.0252306	0.006831	0.0131807	0.0188363	0.0586567	0.0191147	0.0176528	0.0239426
trans-piperitone oxide	0	0	0	0	0	0	0	0
isopiperitenone	0.657693	0.0958229	0.331372	0.605331	0.903947	0.931279	0.485182	0.68905
neo-menthyl acetate	0	0	0	0	0	0	0	0
bornyl acetate	0	0	0	0	0	0	0	0
menthyl acetate	0	0	0	0	0	0	0	0
carvacrol	0	0	0	0	0	0	0	0
piperitenone	5.64488	0.827913	2.91909	5.58149	8.06309	7.5535	3.7678	5.98433
piperitenone oxide	0.0397871	0.00645044	0.0196095	0.0271694	0.0416954	0.0654154	0.0404644	0.0443687
B-caryophyllene	0.0130551	0.00170055	0.0105928	0.0141722	0.0115188	0.0208518	0.00914572	0.0120489
(E)-B-farnesene	0.0781003	0.0107842	0.0834892	0.0739613	0.113316	0.100043	0.0461172	0.0516754
a-humulene	0	0	0	0	0	0	0	0
y-muurolene	0.228031	0.0229256	0.241093	0.278422	0.152291	0.3009	0.207126	0.188355
germacrene D	4.5026	0.818936	2.96641	5.05365	5.05774	8.00406	2.6746	3.25914
bicyclogermacrene	0.0121476	0.00471106	0.00536385	0.0182031	0.00781559	0.0323436	0.0091598	0
a-muurolene	0.0671199	0.00580014	0.0733146	0.0854614	0.0511475	0.0792748	0.0596733	0.0538477
y-cadinene	0.220247	0.0249037	0.220979	0.264471	0.170607	0.318471	0.18249	0.164463
d-cadinene	0.345399	0.0406577	0.338303	0.454293	0.267791	0.480884	0.282231	0.248892
a-cadinene	0.064566	0.0087624	0.0653186	0.0861991	0.0342283	0.091499	0.052962	0.0571892
Stem
CMEN 585.001 - Greenhouse	Avg. %	Std. Error	1	2	3	4	5	6
a-thujene	0.0695526	0.0239418	0.181415	0.0397734	0.0198061	0.0592468	0.0364845	0.0805898
a-pinene	0.338384	0.121394	0.908264	0.16773	0.178775	0.227215	0.129029	0.419291
camphene	0.130734	0.0427132	0.333893	0.0718411	0.0805702	0.0848989	0.0607284	0.15247
sabinene	0.231963	0.0698021	0.534319	0.148858	0.0531177	0.205493	0.138217	0.311773
1-octen-3-ol	0.00382707	0.00257977	0	0	0	0.0080244	0	0.014938
B-pinene	0.674049	0.208299	1.63595	0.333991	0.521854	0.487787	0.247086	0.817631
3-octanone	0.00186546	0.00186546	0	0	0	0	0.0111927	0
myrcene	0.0857173	0.0144821	0.121729	0.0571786	0.051663	0.0959559	0.0565889	0.131189
3-octanol	0.236717	0.0673846	0.566311	0.171141	0.137458	0.141165	0.233024	0.171204
a-phellandrene	0.00609964	0.00446362	0	0	0.0269952	0	0.00960262	0
a-terpinene	0.057094	0.00913906	0.0929757	0.058896	0.0715636	0.0345435	0.0368674	0.0477177
p-cymene	0.126645	0.0159397	0.129406	0.144738	0.192957	0.084225	0.0975846	0.110961
limonene	0.105139	0.0169376	0.159494	0.0756721	0.0699168	0.114168	0.0641947	0.147389
1,8-cineole	2.11141	0.638035	5.23299	1.89262	0.951802	1.65523	1.32736	1.60844
y-terpinene	0.102933	0.0131661	0.156729	0.104085	0.118632	0.0718166	0.0707383	0.0955946
trans-sabinene hydrate	0.0331402	0.00618975	0.0290527	0.0274569	0.00924017	0.0541179	0.0415543	0.0374195
terpinolene	0.0465087	0.00528196	0.0722371	0.0406081	0.0445537	0.0392713	0.0374864	0.0448955
linalool	0.384164	0.0315803	0.362529	0.308137	0.293583	0.476194	0.397858	0.466683
camphor	0.0362724	0.0130093	0	0.0307707	0.0137987	0.0860424	0.0614614	0.0255613
menthone	2.19207	1.58116	10.0498	0.262207	0.147325	1.27924	0.474196	0.939678
pinocarvone	0	0	0	0	0	0	0	0
menthofuran	0.151018	0.0624028	0	0.0957005	0.0410651	0.163039	0.430496	0.175808
isomenthone	17.8552	11.1256	72.64	3.39477	1.62775	14.3209	4.77463	10.3734
neomenthol	0.00123691	0.00123691	0	0	0	0.00742146	0	0
d-terpineol	0.522017	0.0604965	0.43069	0.590203	0.311477	0.577583	0.481599	0.74055
borneol	4.04571	0.33252	2.6669	5.1581	3.89867	3.93471	4.36745	4.24846
trans-isopulegone	0.803141	0.14945	0.0609471	0.926698	0.972672	0.926499	1.02488	0.907152
menthol	0.131186	0.0175762	0.0584588	0.171355	0.170581	0.108093	0.130726	0.147905
terpinen-4-ol	0.14724	0.0138252	0.105376	0.18142	0.186589	0.113578	0.140182	0.156294
cis-isopulegone	0	0	0	0	0	0	0	0
isomenthol	0	0	0	0	0	0	0	0
neoisomenthol	0	0	0	0	0	0	0	0
a-terpineol	1.32535	0.175657	0.809791	1.54762	0.82416	1.57545	1.32499	1.87006
myrtenal	0	0	0	0	0	0	0	0
cis-dihydrocarvone	0	0	0	0	0	0	0	0
trans-dihydrocarvone	0.00225437	0.00143113	0	0.00628484	0	0	0.00724139	0
trans-carveol	0	0	0	0	0	0	0	0
cis-carveol	0	0	0	0	0	0	0	0
pulegone	65.4573	12.8401	2.31863	80.3324	85.9798	70.1	80.7985	73.2148
carvone	0	0	0	0	0	0	0	0
cis-piperitone oxide	0.00656939	0.00225611	0	0.00894947	0.00778672	0.0145129	0.000413458	0.00775382
piperitone	0.188763	0.05161	0.320905	0.115129	0.0344731	0.356307	0.117014	0.188748
trans-piperitone oxide	0.00475389	0.00306065	0	0	0.016479	0	0.0120443	0
isopiperitenone	0.260468	0.0557143	0	0.40027	0.273356	0.309984	0.316238	0.262961
neo-menthyl acetate	0	0	0	0	0	0	0	0
bornyl acetate	0.00166964	0.00166964	0	0	0	0	0.0100178	0
menthyl acetate	0	0	0	0	0	0	0	0
carvacrol	0	0	0	0	0	0	0	0
piperitenone	1.94893	0.422356	0	2.96906	2.51407	1.98978	2.37432	1.84633
piperitenone oxide	0.0392637	0.0143101	0	0.0872814	0.0318045	0.0207653	0.0774479	0.018283
B-caryophyllene	0	0	0	0	0	0	0	0
(E)-B-farnesene	0.00231477	0.00231477	0	0	0.0138886	0	0	0
a-humulene	0.0004647	0.0004647	0	0	0	0	0.0027882	0
y-muurolene	0.016183	0.00514561	0	0.0106546	0.0135721	0.0359387	0.0115983	0.0253341
germacrene D	0.0505009	0.0203744	0	0.0311684	0.01138	0.126814	0.0381638	0.0954799
bicyclogermacrene	0	0	0	0	0	0	0	0
a-muurolene	0.00847556	0.00300812	0	0.00703918	0.0118143	0.0168216	0	0.0151783
y-cadinene	0.0147447	0.00445918	0	0.00987624	0.0154956	0.0309181	0.00939355	0.0227848
d-cadinene	0.0366223	0.00743308	0.0212739	0.0203335	0.0526436	0.0560099	0.0186594	0.0508138
a-cadinene	0.00426103	0.00195585	0	0	0.00687827	0.0102845	0	0.00840337
Rhizome
CMEN 585.001 - Greenhouse	Avg. %	Std. Dev.	1	2	3	4	5	6
a-thujene	0.0863223	0.0802805	0	0.0310081	0	0.486926	0	0
a-pinene	0.657636	0.264534	0.320803	0.0796143	1.69425	0.949513	0.901636	0
camphene	0.0691909	0.0630753	0	0.0316376	0	0	0.383508	0
sabinene	0.154624	0.0929854	0	0.0509592	0	0.527463	0.349322	0
1-octen-3-ol	0.177713	0.109365	0	0	0.690763	0	0.169674	0.205839
B-pinene	1.00231	0.246551	0.442867	0.143294	1.50031	1.7023	1.18486	1.04021
3-octanone	0.007244	0.007244	0	0.043464	0	0	0	0
myrcene	0.0380842	0.0304549	0	0	0	0	0.186433	0.0420718
3-octanol	0.0143967	0.0143967	0	0.0863801	0	0	0	0
a-phellandrene	0	0	0	0	0	0	0	0
a-terpinene	0.0414874	0.022604	0	0.0275078	0	0.124603	0.0968137	0
p-cymene	1.90741	1.28797	0.314057	0.337659	0	8.20388	0.691208	1.89763
limonene	1.23731	0.612025	0.422197	0.0977819	0.902111	1.22595	0.583169	4.19263
1,8-cineole	1.16714	0.386717	0.511268	0.58447	2.58481	2.16606	0.665503	0.490704
y-terpinene	0.135049	0.0605437	0	0.0554986	0	0.297234	0.120875	0.336684
trans-sabinene hydrate	0.0214134	0.0150952	0	0.0384184	0	0	0.0900618	0
terpinolene	0.0251685	0.0195014	0	0.0318724	0	0.119139	0	0
linalool	0.0611518	0.0488893	0	0.0676314	0	0	0.29928	0
camphor	0.231806	0.0647756	0.392972	0.135526	0	0.420022	0.196198	0.246119
menthone	8.68535	2.23884	9.58943	8.33419	3.68195	18.56	3.50568	8.4408
pinocarvone	0	0	0	0	0	0	0	0
menthofuran	5.03104	2.44791	1.7616	0.955993	4.9221	1.53408	16.8417	4.1708
isomenthone	36.0417	6.69135	51.4167	30.5357	25.898	53.8722	11.4272	43.1005
neomenthol	0.0463805	0.032782	0	0.0824585	0	0.195824	0	0
d-terpineol	0.0941611	0.0941611	0	0	0	0	0.564967	0
borneol	2.06046	0.632283	1.14181	0.744355	2.03839	1.26769	5.02373	2.14679
trans-isopulegone	0.292037	0.148413	0.296061	0.839093	0	0	0.617071	0
menthol	0.0484569	0.0340907	0	0.0875408	0	0	0.2032	0
terpinen-4-ol	0.0521308	0.0373781	0	0.0881936	0	0	0.224591	0
cis-isopulegone	0	0	0	0	0	0	0	0
isomenthol	0	0	0	0	0	0	0	0
neoisomenthol	0	0	0	0	0	0	0	0
a-terpineol	0.359619	0.250436	0.352875	0.133344	0	0.0879984	1.5835	0
myrtenal	0	0	0	0	0	0	0	0
cis-dihydrocarvone	0	0	0	0	0	0	0	0
trans-dihydrocarvone	0	0	0	0	0	0	0	0
trans-carveol	0	0	0	0	0	0	0	0
cis-carveol	0	0	0	0	0	0	0	0
pulegone	38.7152	7.74096	32.1832	55.0579	53.6548	6.49868	52.4222	32.4744
carvone	0.327372	0.327372	0	0	1.96423	0	0	0
cis-piperitone oxide	0	0	0	0	0	0	0	0
piperitone	0.875232	0.250921	0.48893	0.701304	0	1.76046	1.08587	1.21482
trans-piperitone oxide	0	0	0	0	0	0	0	0
isopiperitenone	0.032051	0.0207989	0	0.0781156	0	0	0.11419	0
neo-menthyl acetate	0	0	0	0	0	0	0	0
bornyl acetate	0	0	0	0	0	0	0	0
menthyl acetate	0	0	0	0	0	0	0	0
carvacrol	0	0	0	0	0	0	0	0
piperitenone	0.301422	0.0972398	0.365241	0.507354	0.468295	0	0.467644	0
piperitenone oxide	0	0	0	0	0	0	0	0
B-caryophyllene	0	0	0	0	0	0	0	0
(E)-B-farnesene	0	0	0	0	0	0	0	0
a-humulene	0	0	0	0	0	0	0	0
y-muurolene	0	0	0	0	0	0	0	0
germacrene D	0	0	0	0	0	0	0	0
bicyclogermacrene	0	0	0	0	0	0	0	0
a-muurolene	0	0	0	0	0	0	0	0
y-cadinene	0	0	0	0	0	0	0	0
d-cadinene	0.00195358	0.00195358	0	0.0117215	0	0	0	0
a-cadinene	0	0	0	0	0	0	0	0
Root
CMEN 585.001 - Greenhouse	Avg. %	0.763763	1	2	3	4	5	6
a-thujene	0	0	0	0	0	0	0	0
a-pinene	1.81041	1.21625	0.37348	0	0	3.13557	7.35339	0
camphene	0.817701	0.663808	0	0	0	0.841329	4.06488	0
sabinene	0	0	0	0	0	0	0	0
1-octen-3-ol	0.335487	0.249199	0.500312	0	1.51261	0	0	0
B-pinene	2.48496	1.10535	0.813359	0	0	2.90541	6.59098	4.6
3-octanone	0.799161	0.696152	0.543439	0	4.25152	0	0	0
myrcene	0.564528	0.564528	0	0	0	0	0	3.38717
3-octanol	0	0	0	0	0	0	0	0
a-phellandrene	0	0	0	0	0	0	0	0
a-terpinene	0	0	0	0	0	0	0	0
p-cymene	1.08812	0.584246	0.466	0.600144	0	1.77028	0	3.69231
limonene	1.1883	0.409851	0.500312	0.577106	1.4053	2.0445	0	2.60259
1,8-cineole	2.81138	0.679596	0.842116	1.1043	3.73954	5.28652	3.08639	2.80942
y-terpinene	0	0	0	0	0	0	0	0
trans-sabinene hydrate	0	0	0	0	0	0	0	0
terpinolene	0	0	0	0	0	0	0	0
linalool	0	0	0	0	0	0	0	0
camphor	2.47793	1.11795	1.15197	0.523826	3.46749	2.27092	0	7.45339
menthone	2.81476	0.537954	1.67972	1.50059	2.14266	4.99097	3.41431	3.16029
pinocarvone	0	0	0	0	0	0	0	0
menthofuran	2.20127	0.848493	0.2402	0	1.57355	3.12843	2.68494	5.5805
isomenthone	13.2701	1.68631	17.9126	13.6189	9.38415	14.4362	16.8566	7.41241
neomenthol	0	0	0	0	0	0	0	0
d-terpineol	0	0	0	0	0	0	0	0
borneol	14.3313	4.09984	16.4766	8.67968	11.2508	8.33638	7.52371	33.7206
trans-isopulegone	0.3286	0.207843	0	0.996429	0.975173	0	0	0
menthol	0	0	0	0	0	0	0	0
terpinen-4-ol	0.0558973	0.0558973	0.335384	0	0	0	0	0
cis-isopulegone	0	0	0	0	0	0	0	0
isomenthol	0	0	0	0	0	0	0	0
neoisomenthol	0	0	0	0	0	0	0	0
a-terpineol	0.328927	0.208257	0.949233	1.02433	0	0	0	0
myrtenal	0	0	0	0	0	0	0	0
cis-dihydrocarvone	0	0	0	0	0	0	0	0
trans-dihydrocarvone	0	0	0	0	0	0	0	0
trans-carveol	0	0	0	0	0	0	0	0
cis-carveol	0	0	0	0	0	0	0	0
pulegone	46.6685	8.28527	56.1752	70.476	60.2972	48.9283	21.3998	22.7344
carvone	0	0	0	0	0	0	0	0
cis-piperitone oxide	0	0	0	0	0	0	0	0
piperitone	0.552407	0.465203	0.467559	0	0	0	0	2.84688
trans-piperitone oxide	0	0	0	0	0	0	0	0
isopiperitenone	0	0	0	0	0	0	0	0
neo-menthyl acetate	0	0	0	0	0	0	0	0
bornyl acetate	0	0	0	0	0	0	0	0
menthyl acetate	0	0	0	0	0	0	0	0
carvacrol	0	0	0	0	0	0	0	0
piperitenone	0.566068	0.311938	0.57255	0.898673	0	1.92518	0	0
piperitenone oxide	0	0	0	0	0	0	0	0
B-caryophyllene	0	0	0	0	0	0	0	0
(E)-B-farnesene	0	0	0	0	0	0	0	0
a-humulene	0	0	0	0	0	0	0	0
y-muurolene	0.836553	0.836553	0	0	0	0	5.01932	0
germacrene D	1.69025	1.69025	0	0	0	0	10.1415	0
bicyclogermacrene	0	0	0	0	0	0	0	0
a-muurolene	0.370681	0.370681	0	0	0	0	2.22409	0
y-cadinene	0.577738	0.577738	0	0	0	0	3.46643	0
d-cadinene	1.02895	1.02895	0	0	0	0	6.17371	0
a-cadinene	0	0	0	0	0	0	0	0

## Sheet: M.longifoliaCMEN584
Leaf
CMEN 584.001 - Greenhouse	Avg. %	Std. Dev.	1	2	3	4	5	6
a-thujene	0.00246745	0.00107078	0.00207356	0.00733779	0.00290341	0.000452933	0	0.002037
a-pinene	0.0107452	0.00684397	0.00196545	0.0103156	0.00343111	0.00231536	0.044341	0.00210244
camphene	0.0057164	0.00350744	0.000870361	0.00708838	0.00064335	0.00144994	0.0225555	0.00169089
sabinene	0.0114916	0.00387664	0.00538839	0.0233247	0.00696563	0.0042202	0.0240598	0.00499087
1-octen-3-ol	0.000122585	0.000122585	0.000735512	0	0	0	0	0
B-pinene	0.0270278	0.0179238	0.0039987	0.0229318	0.00890327	0.00481091	0.115501	0.00602132
3-octanone	0.0478328	0.0379284	0.00456403	0.00390406	0.0267939	0.00728422	0.23668	0.00777083
myrcene	0.0174411	0.00586726	0.00773016	0.037132	0.00835399	0.0106307	0.0346169	0.006183
3-octanol	0.800004	0.203211	0.40506	1.36407	0.529881	0.586668	1.50344	0.410908
a-phellandrene	0.00851724	0.00487199	0	0.00212303	0.0037441	0.00567436	0.032312	0.00724998
a-terpinene	0.0415988	0.0321453	0.00421357	0.0103898	0.00743772	0.0102581	0.202156	0.0151379
p-cymene	0.0166394	0.0112353	0.00247308	0.00524817	0.00371907	0.00809243	0.072639	0.00766456
limonene	0.558395	0.181821	0.30637	1.00502	0.240241	0.364293	1.23657	0.197883
1,8-cineole	0.00100509	0.000809384	0.00107482	0.00495571	0	0	0	0
y-terpinene	0.0792299	0.0556055	0.00843568	0.0235193	0.015484	0.0364556	0.356366	0.0351188
trans-sabinene hydrate	0.00437429	0.0024889	0.0037101	0.0162442	0.00441381	0	0	0.00187764
terpinolene	0.0192191	0.00929466	0.00485373	0.0215773	0.00534477	0.0105626	0.0640192	0.00895707
linalool	0.000929276	0.000472117	0.00107415	0.00279046	0.00171105	0	0	0
camphor	0.00255716	0.0016689	0	0.00116903	0	0.00087198	0.010663	0.00263894
menthone	0	0	0	0	0	0	0	0
pinocarvone	0.00253023	0.000753409	0.000992033	0.0052179	0.00250352	0.00308243	0	0.00338547
menthofuran	0	0	0	0	0	0	0	0
isomenthone	0	0	0	0	0	0	0	0
neomenthol	0	0	0	0	0	0	0	0
d-terpineol	0.000978734	0.000978734	0	0	0.0058724	0	0	0
borneol	1.53328	0.32617	1.16374	2.58862	0.807097	1.01949	1.10451	2.51621
trans-isopulegone	0	0	0	0	0	0	0	0
menthol	0	0	0	0	0	0	0	0
terpinen-4-ol	0.021697	0.0124715	0.0192627	0.0774609	0.0334585	0	0	0
cis-isopulegone	0	0	0	0	0	0	0	0
isomenthol	0.000255131	0.000255131	0	0.00153079	0	0	0	0
neoisomenthol	0	0	0	0	0	0	0	0
a-terpineol	0	0	0	0	0	0	0	0
myrtenal	0.317187	0.0418733	0.25751	0.476707	0.193496	0.253725	0.37592	0.345765
cis-dihydrocarvone	0.27998	0.0236167	0.211258	0.344731	0.333223	0.231036	0.31578	0.243855
trans-dihydrocarvone	0.0313805	0.0127506	0.00514988	0.0218227	0.0174301	0.0238953	0.0932339	0.0267511
trans-carveol	0	0	0	0	0	0	0	0
cis-carveol	0	0	0	0	0	0	0	0
pulegone	0	0	0	0	0	0	0	0
carvone	87.7157	2.58946	87.2087	75.6751	87.9278	91.0917	90.7212	93.6698
cis-piperitone oxide	0	0	0	0	0	0	0	0
piperitone	0.272569	0.0843123	0.243363	0.586843	0.461464	0.116139	0.074616	0.15299
trans-piperitone oxide	0	0	0	0	0	0	0	0
isopiperitenone	0.0181522	0.0125872	0.0787368	0.00895076	0	0	0	0.0212255
neo-menthyl acetate	0	0	0	0	0	0	0	0
bornyl acetate	0.0184029	0.00806949	0.012644	0.0566348	0.00823208	0.0143386	0	0.0185681
menthyl acetate	0	0	0	0	0	0	0	0
carvacrol	0.00515074	0.00145125	0.0108773	0.00441541	0.00527159	0.00645557	0	0.00388461
piperitenone	0.0852808	0.0345385	0.245268	0.0573089	0.0518638	0.0570515	0	0.100192
piperitenone oxide	0.00427882	0.00156777	0.0101599	0.00690235	0.00468153	0.000722622	0	0.0032065
B-caryophyllene	0.0186109	0.00548514	0.025761	0.039939	0.0184289	0.0124855	0	0.015051
(E)-B-farnesene	0.00294601	0.00234328	0	0	0.0143417	0	0	0.00333435
a-humulene	0	0	0	0	0	0	0	0
y-muurolene	0.48605	0.0731312	0.48463	0.699242	0.613429	0.442792	0.501075	0.175132
germacrene D	5.47776	1.78628	7.51726	12.4814	6.52296	4.30504	0.630959	1.409
bicyclogermacrene	0.419589	0.243272	0.281411	1.57855	0.496278	0.115273	0.0159448	0.0300712
a-muurolene	0.17172	0.0374963	0.130423	0.217812	0.154191	0.15378	0.323529	0.0505831
y-cadinene	0.414643	0.0963041	0.359384	0.843853	0.475817	0.306615	0.356099	0.146092
d-cadinene	0.924872	0.177992	0.843227	1.42201	0.848979	0.700897	1.43009	0.304028
a-cadinene	0.121674	0.0263076	0.125699	0.235843	0.13326	0.0914117	0.101154	0.0426753
Stem
CMEN 584.001 - Greenhouse	Avg. %	Std. Dev.	1	2	3	4	5	6
a-thujene	0.0119552	0.00516918	0.00735826	0.00947961	0.0253818	0	0.0295115	0
a-pinene	0.0375406	0.0150128	0.0144172	0.00644993	0.0765895	0.0332635	0.0892623	0.00526094
camphene	0.0229037	0.00796102	0.00761607	0.0067569	0.0346934	0.0325703	0.0516066	0.00417905
sabinene	0.0580046	0.0228799	0.0278102	0.0164587	0.131506	0.0329832	0.127807	0.0114633
1-octen-3-ol	0.000318359	0.000318359	0.00191015	0	0	0	0	0
B-pinene	0.0838969	0.034436	0.037682	0.0167223	0.166703	0.0584839	0.211536	0.0122545
3-octanone	0.0163742	0.00514908	0.00907271	0.00334913	0.0239021	0.0226235	0.0347362	0.00456157
myrcene	0.0763798	0.0331384	0.0374618	0.0127134	0.163523	0.0334169	0.195669	0.0154949
3-octanol	0.721507	0.193106	0.738246	0.341306	1.30643	1.27338	0.453468	0.216213
a-phellandrene	0	0	0	0	0	0	0	0
a-terpinene	0.00790459	0.00139449	0.0068195	0.00955486	0.0100204	0.0078739	0.0113986	0.00176034
p-cymene	0.0225687	0.00251592	0.0214866	0.0277423	0.0166739	0.0274302	0.0280717	0.0140076
limonene	2.20929	0.85668	0.99692	0.401031	4.28084	1.51763	5.39204	0.667283
1,8-cineole	0.0183375	0.00633004	0.00915381	0.00621821	0.0432157	0.0138088	0.0316786	0.00595009
y-terpinene	0.015563	0.00283439	0.0123388	0.0218681	0.0198962	0.0122172	0.0222643	0.0047934
trans-sabinene hydrate	0.011261	0.00311476	0.00669453	0.00921506	0.0159446	0.0245183	0.00703763	0.00415582
terpinolene	0.0135975	0.00356456	0.00842267	0.00837133	0.0245556	0.0131808	0.0236965	0.00335793
linalool	0	0	0	0	0	0	0	0
camphor	0.0739346	0.05021	0.00393963	0.00799592	0.317151	0.0249447	0.0843535	0.00522311
menthone	0	0	0	0	0	0	0	0
pinocarvone	0.00549945	0.00157638	0.00357394	0.0012393	0.00636155	0.00664299	0.0121669	0.00301202
menthofuran	0	0	0	0	0	0	0	0
isomenthone	0	0	0	0	0	0	0	0
neomenthol	0	0	0	0	0	0	0	0
d-terpineol	0.00241679	0.00109869	0.00399154	0	0.00548344	0.00502576	0	0
borneol	1.55986	0.396119	1.21431	2.71474	0.745088	2.71037	1.5401	0.434582
trans-isopulegone	0.00354813	0.00354813	0	0	0.0212888	0	0	0
menthol	0	0	0	0	0	0	0	0
terpinen-4-ol	0.0332034	0.00841002	0.0260043	0.0491793	0.0373621	0.0625861	0.0164456	0.00764292
cis-isopulegone	0	0	0	0	0	0	0	0
isomenthol	0	0	0	0	0	0	0	0
neoisomenthol	0	0	0	0	0	0	0	0
a-terpineol	0	0	0	0	0	0	0	0
myrtenal	0.037758	0.0163299	0.00270448	0.0336595	0.11014	0.0463193	0.0337246	0
cis-dihydrocarvone	2.59308	0.527814	1.87869	1.87974	0.884769	4.22053	3.91021	2.78454
trans-dihydrocarvone	0.190071	0.0371104	0.114513	0.164977	0.109013	0.337268	0.262751	0.151901
trans-carveol	2.39327	0.781251	3.45715	2.99666	0.217872	5.24944	0.455069	1.98345
cis-carveol	0.0371705	0.0277217	0	0	0.0545179	0.168441	6.40695e-05	0
pulegone	0	0	0	0	0	0	0	0
carvone	88.7737	1.41137	90.6239	88.7567	90.2859	83.3499	86.4611	93.1649
cis-piperitone oxide	0	0	0	0	0	0	0	0
piperitone	0.367787	0.120277	0.189832	0.914841	0.495851	0.252713	0.191259	0.162225
trans-piperitone oxide	0.00419801	0.00314136	0	0	0.0190965	0.00609151	0	0
isopiperitenone	0.17682	0.151301	0.0678975	0.931569	0	0.026455	0	0.0350008
neo-menthyl acetate	0	0	0	0	0	0	0	0
bornyl acetate	0.0142416	0.00618867	0.0160355	0.0428192	0.00761668	0.0138021	0.00517592	0
menthyl acetate	0	0	0	0	0	0	0	0
carvacrol	0.00402895	0.00132568	0.00574024	0.00639464	0	0.00739949	0	0.0046393
piperitenone	0.0730711	0.0208174	0.129987	0.0449129	0.012746	0.109218	0.0259909	0.115572
piperitenone oxide	0	0	0	0	0	0	0	0
B-caryophyllene	0.000499715	0.000499715	0	0.00299829	0	0	0	0
(E)-B-farnesene	0	0	0	0	0	0	0	0
a-humulene	0	0	0	0	0	0	0	0
y-muurolene	0.0273992	0.00509611	0.0199838	0.0502784	0.0273553	0.0221184	0.0301198	0.0145395
germacrene D	0.197325	0.0242726	0.213349	0.293168	0.198793	0.199213	0.167899	0.111531
bicyclogermacrene	0.0121647	0.00410079	0.00837789	0.0290578	0.0178372	0.00768615	0.0100289	0
a-muurolene	0.00954816	0.00167837	0.00823617	0.0174244	0.00952075	0.00698849	0.00933306	0.00578614
y-cadinene	0.0248408	0.00558908	0.0198789	0.0521129	0.0217136	0.0195284	0.0220615	0.0137492
d-cadinene	0.0492975	0.0100523	0.0425391	0.097161	0.0472699	0.037724	0.0449947	0.0260962
a-cadinene	0.00781789	0.00151696	0.00592715	0.0151426	0.00737583	0.00620598	0.00741282	0.0048429
Rhizome
CMEN 584.001 - Greenhouse	Avg. %	Std. Dev.	1	2	3	4	5	6
a-thujene	0	0	0	0	0	0	0	0
a-pinene	0.161054	0.0857918	0.219535	0	0	0.21624	0	0.530549
camphene	0.048342	0.0318296	0	0	0	0.110746	0	0.179306
sabinene	0.0739164	0.0524453	0	0	0	0.129685	0	0.313813
1-octen-3-ol	0.797973	0.432514	0	2.777	0.628195	0.0931523	1.13779	0.1517
B-pinene	0.342305	0.125483	0.316196	0	0.424524	0.527928	0	0.785182
3-octanone	1.41591	0.944317	0	5.75173	0	0	2.35535	0.388395
myrcene	0.17975	0.05666	0.122734	0	0.165211	0.114249	0.283082	0.393222
3-octanol	0.201608	0.067682	0.388597	0	0.333899	0.235042	0	0.252109
a-phellandrene	0	0	0	0	0	0	0	0
a-terpinene	0.0282939	0.0187549	0	0	0.106628	0	0	0.0631354
p-cymene	0.206337	0.0827038	0.202191	0	0.514089	0.162456	0	0.359286
limonene	8.93823	4.54576	4.8723	10.399	1.08506	4.48007	2.10567	30.6873
1,8-cineole	0	0	0	0	0	0	0	0
y-terpinene	0.0356577	0.0229862	0	0	0	0.0897497	0	0.124197
trans-sabinene hydrate	0	0	0	0	0	0	0	0
terpinolene	0.00808412	0.00521946	0.0283173	0	0	0.0201875	0	0
linalool	0	0	0	0	0	0	0	0
camphor	0.427921	0.216047	0.329675	1.46634	0.375312	0.0961086	0	0.300088
menthone	0	0	0	0	0	0	0	0
pinocarvone	0	0	0	0	0	0	0	0
menthofuran	0	0	0	0	0	0	0	0
isomenthone	0	0	0	0	0	0	0	0
neomenthol	0	0	0	0	0	0	0	0
d-terpineol	0	0	0	0	0	0	0	0
borneol	5.42821	1.56814	1.47975	12.0923	6.23813	2.65292	6.65497	3.45121
trans-isopulegone	0	0	0	0	0	0	0	0
menthol	0	0	0	0	0	0	0	0
terpinen-4-ol	0.165823	0.102802	0	0.636399	0.25911	0.0994273	0	0
cis-isopulegone	0	0	0	0	0	0	0	0
isomenthol	0	0	0	0	0	0	0	0
neoisomenthol	0	0	0	0	0	0	0	0
a-terpineol	0	0	0	0	0	0	0	0
myrtenal	0.00819389	0.00819389	0	0	0	0.0491633	0	0
cis-dihydrocarvone	2.33814	0.442157	0.443663	2.83483	2.72232	2.23416	3.68637	2.10747
trans-dihydrocarvone	0.3499	0.148153	0	0.49966	0.205207	0.159037	1.0132	0.222296
trans-carveol	0.0305524	0.0305524	0	0	0	0.183315	0	0
cis-carveol	0.0128828	0.0128828	0	0	0	0.0772969	0	0
pulegone	0	0	0	0	0	0	0	0
carvone	78.7046	5.61156	91.597	63.5428	86.9423	88.078	82.7636	59.3037
cis-piperitone oxide	0	0	0	0	0	0	0	0
piperitone	0.0645051	0.0645051	0	0	0	0	0	0.38703
trans-piperitone oxide	0	0	0	0	0	0	0	0
isopiperitenone	0	0	0	0	0	0	0	0
neo-menthyl acetate	0	0	0	0	0	0	0	0
bornyl acetate	0	0	0	0	0	0	0	0
menthyl acetate	0	0	0	0	0	0	0	0
carvacrol	0	0	0	0	0	0	0	0
piperitenone	0	0	0	0	0	0	0	0
piperitenone oxide	0	0	0	0	0	0	0	0
B-caryophyllene	0	0	0	0	0	0	0	0
(E)-B-farnesene	0	0	0	0	0	0	0	0
a-humulene	0	0	0	0	0	0	0	0
y-muurolene	0.00588969	0.00588969	0	0	0	0.0353381	0	0
germacrene D	0.0116519	0.0116519	0	0	0	0.0699112	0	0
bicyclogermacrene	0	0	0	0	0	0	0	0
a-muurolene	0	0	0	0	0	0	0	0
y-cadinene	0	0	0	0	0	0	0	0
d-cadinene	0.0142961	0.0142961	0	0	0	0.0857766	0	0
a-cadinene	0	0	0	0	0	0	0	0
Root
CMEN 584.001 - Greenhouse	Avg. %	Std. Dev.	1	2	3	4	5	6
a-thujene	0	0	0	0	0	0	0	0
a-pinene	0	0	0	0	0	0	0	0
camphene	0	0	0	0	0	0	0	0
sabinene	0	0	0	0	0	0	0	0
1-octen-3-ol	0.210621	0.113997	0.183445	0.40072	0	0.679559	0	0
B-pinene	0.274045	0.274045	0	0	0	1.64427	0	0
3-octanone	0.743504	0.534266	0.178248	3.29835	0	0.984425	0	0
myrcene	0.0998544	0.0998544	0	0	0	0.599126	0	0
3-octanol	0.131836	0.0954087	0	0.215905	0.575112	0	0	0
a-phellandrene	0	0	0	0	0	0	0	0
a-terpinene	0.752193	0.257091	0.146736	0.201242	0.275236	0.936614	1.44898	1.50435
p-cymene	3.50374	1.16182	0.628558	0.766171	1.47182	5.35939	6.84829	5.94822
limonene	1.69464	0.513554	0.289851	0.87898	0.893363	1.72836	3.47686	2.90042
1,8-cineole	0.141067	0.111545	0.163909	0	0	0.682495	0	0
y-terpinene	1.22049	0.511609	0	0.433783	0	1.59487	2.49998	2.79433
trans-sabinene hydrate	0	0	0	0	0	0	0	0
terpinolene	0.149993	0.126548	0.125585	0	0	0.774371	0	0
linalool	0	0	0	0	0	0	0	0
camphor	8.84394	4.50261	0.633714	5.82439	3.39789	7.438	30.8573	4.91237
menthone	0	0	0	0	0	0	0	0
pinocarvone	0	0	0	0	0	0	0	0
menthofuran	0	0	0	0	0	0	0	0
isomenthone	0	0	0	0	0	0	0	0
neomenthol	0	0	0	0	0	0	0	0
d-terpineol	0	0	0	0	0	0	0	0
borneol	43.1788	9.09651	11.0715	53.8313	57.0089	64.0454	18.8989	54.2169
trans-isopulegone	0	0	0	0	0	0	0	0
menthol	0.312205	0.312205	0	0	0	1.87323	0	0
terpinen-4-ol	1.01266	0.411976	0.34465	1.96954	1.58822	2.17354	0	0
cis-isopulegone	0	0	0	0	0	0	0	0
isomenthol	0	0	0	0	0	0	0	0
neoisomenthol	0	0	0	0	0	0	0	0
a-terpineol	0	0	0	0	0	0	0	0
myrtenal	0.0547017	0.0547017	0	0.32821	0	0	0	0
cis-dihydrocarvone	1.41334	0.621491	0.758251	2.18451	1.56555	0	0	3.97175
trans-dihydrocarvone	0.484829	0.343444	0.432495	0.275115	0	0.0369062	0	2.16445
trans-carveol	0.0949918	0.0949918	0.569951	0	0	0	0	0
cis-carveol	0	0	0	0	0	0	0	0
pulegone	0	0	0	0	0	0	0	0
carvone	35.0858	10.6746	84.4731	29.3549	33.2239	7.51325	34.3623	21.5872
cis-piperitone oxide	0	0	0	0	0	0	0	0
piperitone	0	0	0	0	0	0	0	0
trans-piperitone oxide	0	0	0	0	0	0	0	0
isopiperitenone	0	0	0	0	0	0	0	0
neo-menthyl acetate	0	0	0	0	0	0	0	0
bornyl acetate	0	0	0	0	0	0	0	0
menthyl acetate	0	0	0	0	0	0	0	0
carvacrol	0	0	0	0	0	0	0	0
piperitenone	0	0	0	0	0	0	0	0
piperitenone oxide	0	0	0	0	0	0	0	0
B-caryophyllene	0	0	0	0	0	0	0	0
(E)-B-farnesene	0	0	0	0	0	0	0	0
a-humulene	0	0	0	0	0	0	0	0
y-muurolene	0.192573	0.126927	0	0	0	0.439339	0.7161	0
germacrene D	0.156217	0.156217	0	0	0	0.937303	0	0
bicyclogermacrene	0	0	0	0	0	0	0	0
a-muurolene	0	0	0	0	0	0	0	0
y-cadinene	0	0	0	0	0	0	0	0
d-cadinene	0.247944	0.157052	0	0.0368674	0	0.559494	0.891302	0
a-cadinene	0	0	0	0	0	0	0	0
