# Supplementary material for: Biochemical basis for the formation of organ-specific volatile blends in mint
Source: Front Plant Sci. 2023 Apr 14;14:1125065. doi: 10.3389/fpls.2023.1125065 (PMC10140540; doi:10.3389/fpls.2023.1125065)
Supplement: Supplementary Table 4 — Complete terpenoid profiles for the data sets included in Table 3. [file Table_4.xlsx]

## Sheet: Table Root-Dip Summary
BMPM	Peak Area ÷ mg d.w.					NSM	Peak Area ÷ mg d.w.					CM-585	Peak Area ÷ mg d.w.					CM-584	Peak Area ÷ mg d.w.
Control	Root	Rhizome	Stem			Control	Root	Rhizome	Stem			Control	Root	Rhizome	Stem			Control	Root	Rhizome	Stem
a-thujene	9.9 x 10^2 ± 4.4 x 10^2	5.0 x 10^4 ± 2.3 x 10^4	8.8 x 10^4 ± 2.8 x 10^4			a-thujene		3.3 x 10^4 ± 6.2 x 10^3	6.7 x 10^4 ± 2.9 x 10^4			a-thujene		6.2 x 10^4 ± 1.0 x 10^4	6.7 x 10^4 ± 1.3 x 10^4			a-thujene		1.0 x 10^5 ± 2.3 x 10^4	1.7 x 10^5 ± 5.5 x 10^4
a-pinene	3.3 x 10^3 ± 1.6 x 10^3	1.1 x 10^5 ± 4.4 x 10^4	2.0 x 10^5 ± 3.6 x 10^4			a-pinene		9.6 x 10^4 ± 2.5 x 10^4	1.6 x 10^5 ± 4.8 x 10^4			a-pinene		2.6 x 10^5 ± 3.9 x 10^4	2.8 x 10^5 ± 5.4 x 10^4			a-pinene		2.9 x 10^5 ± 6.8 x 10^4	4.6 x 10^5 ± 1.8 x 10^5
camphene	2.4 x 10^3 ± 1.0 x 10^3	1.2 x 10^3 ± 1.2 x 10^3	1.2 x 10^3 ± 1.2 x 10^3			camphene						camphene		9.5 x 10^4 ± 1.3 x 10^4	9.8 x 10^4 ± 1.9 x 10^4			camphene		2.2 x 10^5 ± 5.9 x 10^4	3.4 x 10^5 ± 1.4 x 10^5
sabinene	8.7 x 10^2 ± 5.5 x 10^2	9.7 x 10^4 ± 4.0 x 10^4	2.2 x 10^5 ± 6.2 x 10^4			sabinene		6.9 x 10^4 ± 1.7 x 10^4	1.8 x 10^5 ± 5.1 x 10^4			sabinene		2.5 x 10^5 ± 3.7 x 10^4	2.6 x 10^5 ± 4.9 x 10^4			sabinene		2.4 x 10^5 ± 5.5 x 10^4	4.6 x 10^5 ± 1.5 x 10^5
1-octen-3-ol	6.8 x 10^3 ± 2.5 x 10^3	3.5 x 10^5 ± 3.0 x 10^5	4.1 x 10^6 ± 1.5 x 10^6			1-octen-3-ol	1.2 x 10^3 ± 7.0 x 10^2	5.9 x 10^3 ± 2.8 x 10^3	2.0 x 10^5 ± 5.7 x 10^4			1-octen-3-ol	2.8 x 10^3 ± 1.2 x 10^3					1-octen-3-ol	9.2 x 10^2 ± 5.9 x 10^2
B-pinene	2.5 x 10^3 ± 1.2 x 10^3	1.7 x 10^5 ± 7.4 x 10^4	3.7 x 10^5 ± 6.6 x 10^4			B-pinene		1.0 x 10^5 ± 3.0 x 10^4	1.9 x 10^5 ± 6.2 x 10^4			B-pinene		6.5 x 10^5 ± 9.0 x 10^4	9.3 x 10^5 ± 1.7 x 10^5			B-pinene		4.3 x 10^5 ± 1.0 x 10^5	7.1 x 10^5 ± 2.6 x 10^5
3-octanone		4.0 x 10^3 ± 4.0 x 10^3	2.5 x 10^4 ± 1.3 x 10^4			3-octanone						3-octanone						3-octanone		5.8 x 10^3 ± 3.7 x 10^3	1.9 x 10^4 ± 9.9 x 10^3
myrcene	3.9 x 10^3 ± 2.0 x 10^3	2.9 x 10^4 ± 1.1 x 10^4	6.7 x 10^4 ± 2.0 x 10^4			myrcene	5.0 x 10^2 ± 3.6 x 10^2	2.5 x 10^5 ± 4.5 x 10^4	1.0 x 10^6 ± 3.1 x 10^5			myrcene		1.7 x 10^5 ± 2.0 x 10^4	1.3 x 10^5 ± 2.5 x 10^4			myrcene		3.1 x 10^5 ± 8.3 x 10^4	7.6 x 10^5 ± 2.6 x 10^5
3-octanol	1.9 x 10^3 ± 1.2 x 10^3	8.4 x 10^4 ± 6.1 x 10^4	1.2 x 10^6 ± 5.6 x 10^5			3-octanol	2.5 x 10^2 ± 1.8 x 10^2	2.3 x 10^4 ± 1.7 x 10^4	4.6 x 10^5 ± 1.8 x 10^5			3-octanol	4.4 x 10^2 ± 2.7 x 10^2	2.2 x 10^5 ± 8.0 x 10^4	5.2 x 10^5 ± 1.0 x 10^5			3-octanol	1.5 x 10^2 ± 1.5 x 10^2	6.2 x 10^5 ± 1.9 x 10^5	1.7 x 10^6 ± 4.3 x 10^5
a-phellandrene		5.9 x 10^3 ± 5.1 x 10^3	1.1 x 10^4 ± 6.2 x 10^3			a-phellandrene			2.0 x 10^4 ± 1.9 x 10^4			a-phellandrene		9.4 x 10^3 ± 2.1 x 10^3	1.9 x 10^4 ± 5.9 x 10^3			a-phellandrene		5.8 x 10^3 ± 1.1 x 10^3	3.4 x 10^4 ± 2.1 x 10^4
a-terpinene	2.4 x 10^3 ± 5.5 x 10^2	3.8 x 10^4 ± 2.2 x 10^4	5.6 x 10^4 ± 2.1 x 10^4			a-terpinene	1.9 x 10^3 ± 4.6 x 10^2	1.6 x 10^4 ± 2.7 x 10^3	8.0 x 10^4 ± 3.6 x 10^4			a-terpinene	1.2 x 10^3 ± 5.9 x 10^2	3.2 x 10^4 ± 5.2 x 10^3	5.7 x 10^4 ± 8.9 x 10^3			a-terpinene	1.6 x 10^3 ± 4.6 x 10^2	3.5 x 10^4 ± 7.1 x 10^3	1.3 x 10^5 ± 4.1 x 10^4
p-cymene	1.1 x 10^4 ± 4.9 x 10^3	6.4 x 10^4 ± 2.9 x 10^4	9.4 x 10^4 ± 2.3 x 10^4			p-cymene	8.0 x 10^3 ± 4.2 x 10^3	8.8 x 10^4 ± 1.7 x 10^4	1.4 x 10^5 ± 4.2 x 10^4			p-cymene	2.2 x 10^3 ± 1.2 x 10^3	7.6 x 10^4 ± 1.5 x 10^4	1.1 x 10^5 ± 1.5 x 10^4			p-cymene	9.2 x 10^3 ± 2.3 x 10^3	5.3 x 10^4 ± 1.0 x 10^4	1.4 x 10^5 ± 4.3 x 10^4
limonene	3.1 x 10^3 ± 1.3 x 10^3	3.7 x 10^5 ± 1.7 x 10^5	3.7 x 10^5 ± 1.2 x 10^5			limonene	1.0 x 10^3 ± 1.0 x 10^3	8.8 x 10^5 ± 4.0 x 10^5	4.3 x 10^6 ± 1.5 x 10^6			limonene		2.5 x 10^5 ± 3.7 x 10^4	1.7 x 10^5 ± 3.3 x 10^4			limonene	2.0 x 10^4 ± 1.2 x 10^4	1.0 x 10^7 ± 1.9 x 10^6	2.3 x 10^7 ± 7.8 x 10^6
1,8-cineole	8.8 x 10^3 ± 4.0 x 10^3	6.4 x 10^5 ± 2.9 x 10^5	1.5 x 10^6 ± 5.2 x 10^5			1,8-cineole	3.3 x 10^3 ± 8.7 x 10^2	1.2 x 10^5 ± 3.7 x 10^4	4.8 x 10^5 ± 1.3 x 10^5			1,8-cineole	2.0 x 10^3 ± 9.0 x 10^2	2.4 x 10^6 ± 4.4 x 10^5	2.8 x 10^6 ± 3.4 x 10^5			1,8-cineole	1.5 x 10^3 ± 5.8 x 10^2
y-terpinene	5.2 x 10^3 ± 1.0 x 10^3	9.7 x 10^4 ± 5.3 x 10^4	1.4 x 10^5 ± 4.7 x 10^4			y-terpinene	3.3 x 10^3 ± 9.1 x 10^2	4.3 x 10^4 ± 8.1 x 10^3	1.8 x 10^5 ± 7.8 x 10^4			y-terpinene		7.2 x 10^4 ± 9.2 x 10^3	1.1 x 10^5 ± 1.7 x 10^4			y-terpinene	3.4 x 10^3 ± 5.5 x 10^2	6.8 x 10^4 ± 1.4 x 10^4	2.3 x 10^5 ± 7.1 x 10^4
trans-sabinene hydrate	6.9 x 10^2 ± 5.3 x 10^2	8.6 x 10^4 ± 4.0 x 10^4	1.1 x 10^5 ± 9.1 x 10^4			trans-sabinene hydrate		2.0 x 10^4 ± 7.7 x 10^3	1.1 x 10^5 ± 1.1 x 10^5			trans-sabinene hydrate		1.8 x 10^4 ± 6.8 x 10^3	2.5 x 10^4 ± 6.4 x 10^3			trans-sabinene hydrate		4.8 x 10^3 ± 3.7 x 10^3	4.6 x 10^4 ± 1.1 x 10^4
terpinolene	2.8 x 10^3 ± 1.2 x 10^3	2.2 x 10^4 ± 1.1 x 10^4	4.1 x 10^4 ± 1.4 x 10^4			terpinolene	5.9 x 10^2 ± 5.9 x 10^2	8.4 x 10^3 ± 3.5 x 10^3	5.0 x 10^4 ± 2.0 x 10^4			terpinolene		5.4 x 10^4 ± 1.0 x 10^4	7.0 x 10^4 ± 1.1 x 10^4			terpinolene	1.6 x 10^2 ± 1.6 x 10^2	7.0 x 10^4 ± 1.8 x 10^4	1.9 x 10^5 ± 5.6 x 10^4
linalool			9.4 x 10^3 ± 9.4 x 10^3			linalool		2.8 x 10^3 ± 1.7 x 10^3	2.5 x 10^4 ± 1.7 x 10^4			linalool		1.8 x 10^5 ± 8.5 x 10^4	8.6 x 10^5 ± 2.1 x 10^5			linalool
camphor	5.2 x 10^3 ± 2.4 x 10^3	4.9 x 10^3 ± 3.5 x 10^3				camphor	5.4 x 10^2 ± 5.4 x 10^2	3.1 x 10^3 ± 1.4 x 10^3	1.2 x 10^3 ± 1.2 x 10^3			camphor	7.3 x 10^2 ± 7.3 x 10^2	5.7 x 10^5 ± 3.1 x 10^5	2.0 x 10^5 ± 6.6 x 10^4			camphor	2.2 x 10^3 ± 1.4 x 10^3	6.5 x 10^4 ± 4.4 x 10^4	4.0 x 10^5 ± 1.2 x 10^5
menthone	3.8 x 10^2 ± 2.4 x 10^2	5.3 x 10^4 ± 1.8 x 10^4	5.2 x 10^5 ± 2.2 x 10^5			menthone						menthone	1.7 x 10^3 ± 7.1 x 10^2	1.6 x 10^7 ± 5.2 x 10^6	3.2 x 10^6 ± 3.0 x 10^5			menthone			6.5 x 10^3 ± 6.5 x 10^3
pinocarvone						pinocarvone	1.1 x 10^4 ± 1.4 x 10^3	1.1 x 10^4 ± 8.4 x 10^2	1.1 x 10^4 ± 5.0 x 10^3			pinocarvone	6.9 x 10^2 ± 6.9 x 10^2					pinocarvone	3.0 x 10^3 ± 1.1 x 10^3	4.9 x 10^3 ± 1.8 x 10^3	1.7 x 10^4 ± 5.5 x 10^3
menthofuran	2.9 x 10^4 ± 1.3 x 10^4	2.5 x 10^7 ± 8.4 x 10^6	4.5 x 10^7 ± 1.5 x 10^7			menthofuran						menthofuran	6.3 x 10^4 ± 2.0 x 10^4	2.0 x 10^5 ± 3.6 x 10^4	5.9 x 10^5 ± 1.1 x 10^5			menthofuran
isomenthone	5.5 x 10^2 ± 3.7 x 10^2	4.0 x 10^4 ± 2.1 x 10^4	2.3 x 10^5 ± 9.6 x 10^4			isomenthone	2.6 x 10^3 ± 2.6 x 10^3					isomenthone	5.4 x 10^3 ± 1.9 x 10^3	9.5 x 10^7 ± 2.4 x 10^7	4.0 x 10^7 ± 4.7 x 10^6			isomenthone		7.1 x 10^3 ± 7.1 x 10^3	1.3 x 10^4 ± 8.8 x 10^3
neomenthol	4.2 x 10^2 ± 4.2 x 10^2	2.2 x 10^5 ± 1.1 x 10^5	6.5 x 10^5 ± 2.6 x 10^5			neomenthol						neomenthol		1.2 x 10^6 ± 8.3 x 10^5				neomenthol
d-terpineol						d-terpineol			3.2 x 10^4 ± 2.6 x 10^4			d-terpineol	1.5 x 10^4 ± 4.7 x 10^3	1.6 x 10^5 ± 5.2 x 10^4	4.1 x 10^5 ± 9.0 x 10^4			d-terpineol		1.6 x 10^3 ± 7.4 x 10^2	8.3 x 10^3 ± 2.2 x 10^3
borneol	6.2 x 10^3 ± 1.7 x 10^3	3.7 x 10^4 ± 9.6 x 10^3				borneol	4.6 x 10^3 ± 1.0 x 10^3	1.3 x 10^4 ± 1.5 x 10^3	1.9 x 10^4 ± 1.6 x 10^4			borneol	3.3 x 10^4 ± 8.7 x 10^3	2.7 x 10^6 ± 1.3 x 10^6	7.7 x 10^6 ± 1.8 x 10^6			borneol	5.0 x 10^4 ± 1.7 x 10^4	5.8 x 10^5 ± 1.3 x 10^5	1.4 x 10^7 ± 3.3 x 10^6
trans-isopulegone						trans-isopulegone			2.5 x 10^3 ± 2.5 x 10^3			trans-isopulegone		2.2 x 10^5 ± 8.9 x 10^4	2.2 x 10^6 ± 2.6 x 10^5			trans-isopulegone		8.7 x 10^3 ± 1.7 x 10^3	5.4 x 10^4 ± 1.3 x 10^4
menthol	3.8 x 10^4 ± 2.0 x 10^4	2.1 x 10^6 ± 1.2 x 10^6	7.9 x 10^6 ± 3.3 x 10^6			menthol	1.3 x 10^3 ± 8.7 x 10^2	1.6 x 10^3 ± 1.1 x 10^3	1.7 x 10^3 ± 1.7 x 10^3			menthol		2.9 x 10^5 ± 2.2 x 10^5				menthol
terpinen-4-ol	2.3 x 10^3 ± 7.4 x 10^2	1.6 x 10^4 ± 1.4 x 10^4				terpinen-4-ol	4.0 x 10^3 ± 9.9 x 10^2	1.5 x 10^4 ± 2.5 x 10^3	1.2 x 10^5 ± 6.9 x 10^4			terpinen-4-ol	9.8 x 10^3 ± 3.5 x 10^3	1.2 x 10^5 ± 4.1 x 10^4	2.4 x 10^5 ± 5.1 x 10^4			terpinen-4-ol	6.1 x 10^3 ± 2.1 x 10^3	3.5 x 10^4 ± 1.1 x 10^4	3.3 x 10^5 ± 9.0 x 10^4
cis-isopulegone						cis-isopulegone						cis-isopulegone		1.2 x 10^4 ± 7.9 x 10^3				cis-isopulegone
isomenthol	1.6 x 10^2 ± 1.6 x 10^2	4.4 x 10^4 ± 2.7 x 10^4	1.0 x 10^5 ± 4.4 x 10^4			isomenthol						isomenthol		7.3 x 10^4 ± 3.7 x 10^4				isomenthol
neoisomenthol		6.5 x 10^3 ± 6.5 x 10^3	1.2 x 10^4 ± 6.7 x 10^3			neoisomenthol						neoisomenthol		8.6 x 10^4 ± 5.7 x 10^4				neoisomenthol
a-terpineol	4.8 x 10^2 ± 4.8 x 10^2	4.6 x 10^2 ± 3.4 x 10^2	1.4 x 10^3 ± 1.4 x 10^3			a-terpineol	6.4 x 10^1 ± 6.4 x 10^1		1.6 x 10^4 ± 9.9 x 10^3			a-terpineol	2.7 x 10^4 ± 1.0 x 10^4	6.1 x 10^5 ± 2.6 x 10^5	2.4 x 10^6 ± 5.9 x 10^5			a-terpineol
myrtenal						myrtenal						myrtenal						myrtenal		4.2 x 10^4 ± 7.7 x 10^3	2.9 x 10^5 ± 8.4 x 10^4
cis-dihydrocarvone						cis-dihydrocarvone	4.1 x 10^2 ± 2.0 x 10^2	5.3 x 10^5 ± 9.9 x 10^4	3.1 x 10^5 ± 1.3 x 10^5			cis-dihydrocarvone						cis-dihydrocarvone	5.5 x 10^3 ± 5.5 x 10^3	3.6 x 10^5 ± 9.0 x 10^4	3.6 x 10^6 ± 8.5 x 10^5
trans-dihydrocarvone						trans-dihydrocarvone		1.9 x 10^4 ± 2.5 x 10^3	2.9 x 10^4 ± 1.2 x 10^4			trans-dihydrocarvone						trans-dihydrocarvone	2.8 x 10^2 ± 2.8 x 10^2	2.3 x 10^4 ± 4.7 x 10^3	3.1 x 10^5 ± 7.7 x 10^4
trans-carveol						trans-carveol	5.1 x 10^2 ± 4.6 x 10^2	4.3 x 10^4 ± 1.2 x 10^4	1.1 x 10^6 ± 1.0 x 10^6			trans-carveol						trans-carveol	1.7 x 10^3 ± 1.7 x 10^3	2.7 x 10^4 ± 9.6 x 10^3	1.1 x 10^7 ± 2.6 x 10^6
cis-carveol						cis-carveol		4.2 x 10^3 ± 1.4 x 10^3	6.7 x 10^4 ± 4.3 x 10^4			cis-carveol						cis-carveol		2.2 x 10^4 ± 9.5 x 10^3	3.9 x 10^5 ± 8.9 x 10^4
pulegone	3.7 x 10^3 ± 1.9 x 10^3	1.6 x 10^5 ± 1.5 x 10^5	1.5 x 10^6 ± 1.0 x 10^6			pulegone						pulegone	1.5 x 10^4 ± 6.9 x 10^3	1.8 x 10^7 ± 5.8 x 10^6	2.2 x 10^8 ± 3.5 x 10^7			pulegone		6.6 x 10^3 ± 6.6 x 10^3
carvone	8.9 x 10^1 ± 8.9 x 10^1		1.6 x 10^3 ± 1.6 x 10^3			carvone	5.2 x 10^3 ± 3.4 x 10^3	2.9 x 10^6 ± 1.6 x 10^6	7.1 x 10^7 ± 3.2 x 10^7			carvone		4.0 x 10^4 ± 2.8 x 10^4	5.5 x 10^4 ± 1.8 x 10^4			carvone	1.3 x 10^5 ± 1.2 x 10^5	4.7 x 10^7 ± 9.9 x 10^6	2.4 x 10^8 ± 5.1 x 10^7
cis-piperitone oxide						cis-piperitone oxide						cis-piperitone oxide		2.3 x 10^3 ± 2.3 x 10^3	2.6 x 10^4 ± 1.2 x 10^4			cis-piperitone oxide
piperitone		8.5 x 10^3 ± 5.4 x 10^3	2.9 x 10^4 ± 8.0 x 10^3			piperitone		8.0 x 10^3 ± 4.0 x 10^3	2.1 x 10^5 ± 1.2 x 10^5			piperitone		2.6 x 10^6 ± 6.5 x 10^5	6.0 x 10^5 ± 1.1 x 10^5			piperitone	1.1 x 10^3 ± 9.7 x 10^2	3.9 x 10^5 ± 1.6 x 10^5	1.7 x 10^6 ± 3.9 x 10^5
trans-piperitone oxide						trans-piperitone oxide						trans-piperitone oxide			1.1 x 10^4 ± 4.2 x 10^3			trans-piperitone oxide
isopiperitenone						isopiperitenone			5.3 x 10^4 ± 3.7 x 10^4			isopiperitenone		6.7 x 10^4 ± 2.1 x 10^4	2.9 x 10^5 ± 4.8 x 10^4			isopiperitenone		6.7 x 10^3 ± 2.4 x 10^3	6.8 x 10^4 ± 1.6 x 10^4
neo-menthyl acetate	6.8 x 10^2 ± 3.0 x 10^2	7.4 x 10^4 ± 3.0 x 10^4	4.5 x 10^4 ± 2.6 x 10^4			neo-menthyl acetate						neo-menthyl acetate						neo-menthyl acetate
bornyl acetate						bornyl acetate						bornyl acetate			2.6 x 10^3 ± 2.6 x 10^3			bornyl acetate		6.5 x 10^3 ± 2.3 x 10^3	1.9 x 10^5 ± 5.5 x 10^4
menthyl acetate	3.3 x 10^3 ± 2.1 x 10^3	9.2 x 10^5 ± 2.4 x 10^5	7.4 x 10^5 ± 4.4 x 10^5			menthyl acetate						menthyl acetate						menthyl acetate
carvacrol						carvacrol			8.6 x 10^4 ± 8.1 x 10^4			carvacrol						carvacrol		1.6 x 10^4 ± 8.4 x 10^3	1.1 x 10^5 ± 2.8 x 10^4
piperitenone						piperitenone			6.4 x 10^3 ± 6.4 x 10^3			piperitenone		1.0 x 10^5 ± 6.8 x 10^4	2.4 x 10^6 ± 4.6 x 10^5			piperitenone			5.3 x 10^4 ± 1.6 x 10^4
piperitenone oxide						piperitenone oxide						piperitenone oxide			4.0 x 10^4 ± 1.1 x 10^4			piperitenone oxide
B-caryophyllene	4.8 x 10^2 ± 2.1 x 10^2	2.0 x 10^4 ± 1.1 x 10^4	4.2 x 10^4 ± 1.8 x 10^4			B-caryophyllene	4.3 x 10^1 ± 4.3 x 10^1	2.1 x 10^4 ± 3.9 x 10^3	1.0 x 10^5 ± 4.6 x 10^4			B-caryophyllene		1.9 x 10^3 ± 1.3 x 10^3	3.8 x 10^3 ± 1.9 x 10^3			B-caryophyllene		9.8 x 10^2 ± 9.8 x 10^2	8.0 x 10^3 ± 3.8 x 10^3
(E)-B-farnesene		2.7 x 10^3 ± 1.7 x 10^3	2.4 x 10^4 ± 1.5 x 10^4			(E)-B-farnesene		2.2 x 10^4 ± 6.7 x 10^3	2.4 x 10^5 ± 1.3 x 10^5			(E)-B-farnesene		1.0 x 10^4 ± 6.6 x 10^3	6.3 x 10^4 ± 2.8 x 10^4			(E)-B-farnesene			3.0 x 10^4 ± 1.8 x 10^4
a-humulene						a-humulene						a-humulene						a-humulene
y-muurolene	1.3 x 10^2 ± 1.3 x 10^2		6.5 x 10^3 ± 4.5 x 10^3			y-muurolene		3.3 x 10^3 ± 2.2 x 10^3	3.0 x 10^4 ± 2.1 x 10^4			y-muurolene		7.1 x 10^4 ± 2.7 x 10^4	1.7 x 10^5 ± 3.6 x 10^4			y-muurolene	1.8 x 10^2 ± 1.8 x 10^2	2.0 x 10^4 ± 7.0 x 10^3	1.6 x 10^5 ± 3.9 x 10^4
germacrene D		7.5 x 10^3 ± 3.2 x 10^3	4.9 x 10^4 ± 2.6 x 10^4			germacrene D		2.9 x 10^4 ± 9.7 x 10^3	2.1 x 10^5 ± 1.3 x 10^5			germacrene D		3.2 x 10^5 ± 1.4 x 10^5	7.8 x 10^5 ± 2.5 x 10^5			germacrene D		5.5 x 10^4 ± 2.3 x 10^4	7.9 x 10^5 ± 2.8 x 10^5
bicyclogermacrene			9.3 x 10^2 ± 9.3 x 10^2			bicyclogermacrene						bicyclogermacrene			5.0 x 10^2 ± 5.0 x 10^2			bicyclogermacrene		9.7 x 10^3 ± 4.8 x 10^3	9.4 x 10^4 ± 3.6 x 10^4
a-muurolene	7.3 x 10^2 ± 3.4 x 10^2					a-muurolene	3.3 x 10^2 ± 3.3 x 10^2		1.1 x 10^4 ± 9.1 x 10^3			a-muurolene	8.9 x 10^2 ± 5.5 x 10^2	2.7 x 10^4 ± 1.1 x 10^4	7.3 x 10^4 ± 1.3 x 10^4			a-muurolene	1.3 x 10^3 ± 8.5 x 10^2	1.0 x 10^4 ± 3.3 x 10^3	6.9 x 10^4 ± 1.5 x 10^4
y-cadinene	1.4 x 10^3 ± 5.9 x 10^2	1.9 x 10^3 ± 8.6 x 10^2	7.2 x 10^3 ± 4.4 x 10^3			y-cadinene	3.9 x 10^2 ± 3.9 x 10^2	5.2 x 10^3 ± 2.3 x 10^3	3.1 x 10^4 ± 2.1 x 10^4			y-cadinene	1.3 x 10^3 ± 9.0 x 10^2	6.1 x 10^4 ± 2.4 x 10^4	1.8 x 10^5 ± 4.3 x 10^4			y-cadinene	1.7 x 10^3 ± 1.1 x 10^3	1.9 x 10^4 ± 6.9 x 10^3	1.6 x 10^5 ± 4.1 x 10^4
d-cadinene	1.4 x 10^3 ± 4.1 x 10^2	3.9 x 10^3 ± 2.1 x 10^3	1.8 x 10^4 ± 9.3 x 10^3			d-cadinene	7.9 x 10^2 ± 4.7 x 10^2	1.3 x 10^4 ± 3.0 x 10^3	7.3 x 10^4 ± 4.9 x 10^4			d-cadinene	1.6 x 10^3 ± 1.1 x 10^3	1.2 x 10^5 ± 4.2 x 10^4	3.7 x 10^5 ± 7.7 x 10^4			d-cadinene	1.7 x 10^3 ± 1.1 x 10^3	3.8 x 10^4 ± 1.4 x 10^4	3.6 x 10^5 ± 8.3 x 10^4
a-cadinene	3.2 x 10^2 ± 1.9 x 10^2		1.5 x 10^3 ± 1.5 x 10^3			a-cadinene	2.4 x 10^2 ± 2.4 x 10^2	7.4 x 10^2 ± 7.4 x 10^2	8.0 x 10^3 ± 6.5 x 10^3			a-cadinene		2.0 x 10^4 ± 6.0 x 10^3	5.4 x 10^4 ± 1.5 x 10^4			a-cadinene	8.0 x 10^2 ± 4.9 x 10^2	6.7 x 10^3 ± 2.2 x 10^3	4.9 x 10^4 ± 1.1 x 10^4
Response ÷ d.w.	1.5 x 10^5 ± 4.7 x 10^4	3.1 x 10^7 ± 1.1 x 10^7	6.6 x 10^7 ± 1.9 x 10^7			Response ÷ d.w.	5.2 x 10^4 ± 1.8 x 10^4	5.4 x 10^6 ± 1.9 x 10^6	8.1 x 10^7 ± 3.5 x 10^7			Response ÷ d.w.	1.8 x 10^5 ± 5.6 x 10^4	1.4 x 10^8 ± 3.1 x 10^7	2.9 x 10^8 ± 4.3 x 10^7			Response ÷ d.w.	2.4 x 10^5 ± 1.4 x 10^5	6.1 x 10^7 ± 1.1 x 10^7	3.1 x 10^8 ± 6.6 x 10^7
Fold diff. T-to-C ÷ d.w.	0.58	0.59	0.94			Fold diff. T-to-C ÷ d.w.	1.63	0.42	0.35			Fold diff. T-to-C ÷ d.w.	0.92	0.39	1.09			Fold diff. T-to-C ÷ d.w.	0.95	2.14	0.7
Fold diff. Rhiz.-to-Root ÷ d.w.		208				Fold diff. Rhiz.-to-Root ÷ d.w.		104				Fold diff. Rhiz.-to-Root ÷ d.w.		778				Fold diff. Rhiz.-to-Root ÷ d.w.		254
Fold diff. S-to-Root ÷ d.w.			435			Fold diff. S-to-Root ÷ d.w.			1573			Fold diff. S-to-Root ÷ d.w.			1558			Fold diff. S-to-Root ÷ d.w.			1280
Fold diff. S-to-Rhiz. ÷ d.w.			2			Fold diff. S-to-Rhiz. ÷ d.w.			15			Fold diff. S-to-Rhiz. ÷ d.w.			2			Fold diff. S-to-Rhiz. ÷ d.w.			5
BMPM	Peak Area ÷ mg d.w.					NSM	Peak Area ÷ mg d.w.					CM-585	Peak Area ÷ mg d.w.					CM-584	Peak Area ÷ mg d.w.
Treamtent	Root	Rhizome	Stem			Treamtent	Root	Rhizome	Stem			Treamtent	Root	Rhizome	Stem			Treamtent	Root	Rhizome	Stem
a-thujene		4.1 x 10^4 ± 1.3 x 10^4	9.8 x 10^4 ± 2.2 x 10^4			a-thujene		9.0 x 10^3 ± 5.1 x 10^3	6.0 x 10^4 ± 1.2 x 10^4			a-thujene		9.8 x 10^4 ± 2.4 x 10^4	8.0 x 10^4 ± 8.4 x 10^3			a-thujene		1.7 x 10^5 ± 4.9 x 10^4	1.6 x 10^5 ± 4.5 x 10^4
a-pinene	8.8 x 10^2 ± 8.8 x 10^2	1.2 x 10^5 ± 3.8 x 10^4	2.9 x 10^5 ± 3.4 x 10^4			a-pinene	5.3 x 10^2 ± 5.3 x 10^2	3.2 x 10^4 ± 1.9 x 10^4	1.8 x 10^5 ± 2.0 x 10^4			a-pinene		4.4 x 10^5 ± 1.5 x 10^5	4.3 x 10^5 ± 1.1 x 10^5			a-pinene		4.8 x 10^5 ± 1.6 x 10^5	4.7 x 10^5 ± 1.3 x 10^5
camphene	9.4 x 10^2 ± 9.4 x 10^2	6.8 x 10^3 ± 2.3 x 10^3				camphene	6.8 x 10^2 ± 6.8 x 10^2		2.5 x 10^3 ± 8.4 x 10^2			camphene	2.3 x 10^2 ± 2.3 x 10^2	1.8 x 10^5 ± 6.6 x 10^4	1.6 x 10^5 ± 4.0 x 10^4			camphene		3.8 x 10^5 ± 1.0 x 10^5	3.6 x 10^5 ± 1.3 x 10^5
sabinene	2.4 x 10^2 ± 2.4 x 10^2	8.7 x 10^4 ± 1.2 x 10^4	2.6 x 10^5 ± 5.1 x 10^4			sabinene	1.1 x 10^3 ± 6.7 x 10^2	2.7 x 10^4 ± 1.8 x 10^4	1.6 x 10^5 ± 4.4 x 10^4			sabinene		3.9 x 10^5 ± 1.1 x 10^5	3.9 x 10^5 ± 9.0 x 10^4			sabinene		4.7 x 10^5 ± 9.5 x 10^4	4.2 x 10^5 ± 1.0 x 10^5
1-octen-3-ol	3.5 x 10^3 ± 2.0 x 10^3	1.1 x 10^5 ± 4.2 x 10^4	4.2 x 10^6 ± 7.1 x 10^5			1-octen-3-ol	3.6 x 10^3 ± 1.8 x 10^3	4.5 x 10^3 ± 2.2 x 10^3	1.6 x 10^5 ± 5.9 x 10^4			1-octen-3-ol	4.2 x 10^3 ± 1.2 x 10^3					1-octen-3-ol	2.9 x 10^3 ± 1.1 x 10^3
B-pinene	8.4 x 10^2 ± 8.4 x 10^2	1.6 x 10^5 ± 4.4 x 10^4	5.0 x 10^5 ± 5.6 x 10^4			B-pinene	6.4 x 10^2 ± 6.4 x 10^2	3.9 x 10^4 ± 2.6 x 10^4	2.0 x 10^5 ± 3.5 x 10^4			B-pinene		9.6 x 10^5 ± 2.3 x 10^5	1.1 x 10^6 ± 3.0 x 10^5			B-pinene		7.3 x 10^5 ± 2.3 x 10^5	6.4 x 10^5 ± 1.7 x 10^5
3-octanone			2.9 x 10^4 ± 4.5 x 10^3			3-octanone						3-octanone			3.0 x 10^3 ± 3.0 x 10^3			3-octanone		1.4 x 10^5 ± 7.7 x 10^4	2.2 x 10^4 ± 1.4 x 10^4
myrcene	1.1 x 10^3 ± 8.2 x 10^2	2.7 x 10^4 ± 7.2 x 10^3	6.9 x 10^4 ± 1.4 x 10^4			myrcene	2.6 x 10^3 ± 1.7 x 10^3	1.9 x 10^5 ± 1.4 x 10^5	8.0 x 10^5 ± 2.2 x 10^5			myrcene		1.8 x 10^5 ± 3.0 x 10^4	2.6 x 10^5 ± 6.7 x 10^4			myrcene		5.9 x 10^5 ± 1.4 x 10^5	5.7 x 10^5 ± 1.7 x 10^5
3-octanol	2.4 x 10^3 ± 7.8 x 10^2	3.5 x 10^4 ± 7.3 x 10^3	8.1 x 10^5 ± 1.6 x 10^5			3-octanol	2.1 x 10^3 ± 1.4 x 10^3	8.6 x 10^3 ± 3.4 x 10^3	2.7 x 10^5 ± 1.3 x 10^5			3-octanol	5.3 x 10^2 ± 5.3 x 10^2	2.1 x 10^5 ± 5.0 x 10^4	5.1 x 10^5 ± 1.1 x 10^5			3-octanol	4.9 x 10^2 ± 4.9 x 10^2	7.0 x 10^5 ± 3.7 x 10^5	1.1 x 10^6 ± 2.9 x 10^5
a-phellandrene		6.0 x 10^3 ± 1.8 x 10^3	1.0 x 10^4 ± 3.2 x 10^3			a-phellandrene			2.8 x 10^3 ± 1.8 x 10^3			a-phellandrene		7.4 x 10^3 ± 8.6 x 10^2	1.5 x 10^4 ± 2.4 x 10^3			a-phellandrene		1.5 x 10^4 ± 3.5 x 10^3	3.1 x 10^4 ± 1.5 x 10^4
a-terpinene	1.4 x 10^3 ± 6.2 x 10^2	3.1 x 10^4 ± 7.6 x 10^3	5.2 x 10^4 ± 1.2 x 10^4			a-terpinene	1.8 x 10^3 ± 4.4 x 10^2	5.9 x 10^3 ± 1.7 x 10^3	3.5 x 10^4 ± 7.1 x 10^3			a-terpinene	1.1 x 10^3 ± 4.4 x 10^2	3.4 x 10^4 ± 3.7 x 10^3	5.4 x 10^4 ± 7.2 x 10^3			a-terpinene	3.4 x 10^3 ± 7.8 x 10^2	6.7 x 10^4 ± 2.0 x 10^4	7.2 x 10^4 ± 3.2 x 10^4
p-cymene	4.6 x 10^3 ± 2.9 x 10^3	6.5 x 10^4 ± 2.1 x 10^4	1.1 x 10^5 ± 2.1 x 10^4			p-cymene	4.2 x 10^3 ± 5.6 x 10^2	2.7 x 10^4 ± 9.1 x 10^3	1.3 x 10^5 ± 2.9 x 10^4			p-cymene	5.3 x 10^3 ± 3.1 x 10^3	7.1 x 10^4 ± 8.7 x 10^3	1.0 x 10^5 ± 1.7 x 10^4			p-cymene	8.4 x 10^3 ± 2.3 x 10^3	7.6 x 10^4 ± 1.8 x 10^4	7.6 x 10^4 ± 3.1 x 10^4
limonene	6.6 x 10^2 ± 2.6 x 10^2	2.6 x 10^5 ± 1.6 x 10^5	3.2 x 10^5 ± 7.1 x 10^4			limonene	1.7 x 10^3 ± 1.4 x 10^3	3.6 x 10^5 ± 2.2 x 10^5	2.7 x 10^6 ± 8.0 x 10^5			limonene	1.2 x 10^3 ± 5.2 x 10^2	2.6 x 10^5 ± 4.6 x 10^4	3.6 x 10^5 ± 1.2 x 10^5			limonene	1.2 x 10^4 ± 5.5 x 10^3	1.5 x 10^7 ± 3.8 x 10^6	1.8 x 10^7 ± 6.5 x 10^6
1,8-cineole	2.6 x 10^3 ± 6.5 x 10^2	5.2 x 10^5 ± 7.7 x 10^4	1.8 x 10^6 ± 5.4 x 10^5			1,8-cineole	4.8 x 10^3 ± 2.0 x 10^3	4.6 x 10^4 ± 8.7 x 10^3	4.4 x 10^5 ± 1.8 x 10^5			1,8-cineole	4.6 x 10^3 ± 2.0 x 10^3	2.4 x 10^6 ± 2.9 x 10^5	4.0 x 10^6 ± 6.5 x 10^5			1,8-cineole	2.1 x 10^3 ± 3.5 x 10^2
y-terpinene	3.0 x 10^3 ± 1.2 x 10^3	8.1 x 10^4 ± 2.0 x 10^4	1.3 x 10^5 ± 3.3 x 10^4			y-terpinene	3.5 x 10^3 ± 1.3 x 10^3	1.6 x 10^4 ± 5.6 x 10^3	7.9 x 10^4 ± 1.6 x 10^4			y-terpinene	1.8 x 10^3 ± 1.4 x 10^3	7.7 x 10^4 ± 1.0 x 10^4	1.2 x 10^5 ± 1.4 x 10^4			y-terpinene	4.3 x 10^3 ± 7.8 x 10^2	1.1 x 10^5 ± 3.6 x 10^4	1.3 x 10^5 ± 5.6 x 10^4
trans-sabinene hydrate	3.8 x 10^2 ± 3.8 x 10^2	5.9 x 10^4 ± 2.7 x 10^4	3.6 x 10^4 ± 2.2 x 10^4			trans-sabinene hydrate	7.6 x 10^2 ± 7.6 x 10^2	6.3 x 10^3 ± 6.3 x 10^3	5.3 x 10^4 ± 3.0 x 10^4			trans-sabinene hydrate		1.6 x 10^4 ± 4.4 x 10^3	1.3 x 10^3 ± 1.3 x 10^3			trans-sabinene hydrate		3.2 x 10^4 ± 2.3 x 10^4	1.7 x 10^4 ± 6.4 x 10^3
terpinolene	1.4 x 10^3 ± 1.2 x 10^3	1.9 x 10^4 ± 3.2 x 10^3	3.7 x 10^4 ± 9.9 x 10^3			terpinolene		4.1 x 10^3 ± 3.7 x 10^3	2.8 x 10^4 ± 9.1 x 10^3			terpinolene		5.5 x 10^4 ± 8.2 x 10^3	9.0 x 10^4 ± 1.5 x 10^4			terpinolene	1.8 x 10^3 ± 5.6 x 10^2	1.2 x 10^5 ± 2.8 x 10^4	1.1 x 10^5 ± 4.4 x 10^4
linalool		3.8 x 10^2 ± 3.8 x 10^2	6.0 x 10^3 ± 2.8 x 10^3			linalool		1.0 x 10^3 ± 1.0 x 10^3	1.2 x 10^4 ± 7.6 x 10^3			linalool		1.0 x 10^5 ± 1.8 x 10^4	6.1 x 10^5 ± 2.1 x 10^5			linalool
camphor	1.8 x 10^3 ± 1.2 x 10^3	5.3 x 10^3 ± 2.6 x 10^3				camphor	6.9 x 10^2 ± 4.9 x 10^2	8.9 x 10^2 ± 8.9 x 10^2				camphor	3.1 x 10^3 ± 2.9 x 10^3	2.4 x 10^5 ± 1.5 x 10^5	3.4 x 10^5 ± 1.2 x 10^5			camphor	2.2 x 10^4 ± 1.2 x 10^4	1.6 x 10^6 ± 8.3 x 10^5	1.1 x 10^6 ± 6.4 x 10^5
menthone		7.2 x 10^4 ± 3.4 x 10^4	4.4 x 10^5 ± 2.3 x 10^5			menthone						menthone		3.6 x 10^6 ± 6.4 x 10^5	7.8 x 10^6 ± 2.5 x 10^6			menthone
pinocarvone	1.7 x 10^3 ± 1.7 x 10^3					pinocarvone	1.3 x 10^4 ± 3.7 x 10^3	4.2 x 10^3 ± 7.1 x 10^2	5.6 x 10^3 ± 2.5 x 10^3			pinocarvone	3.7 x 10^2 ± 3.7 x 10^2					pinocarvone	6.8 x 10^3 ± 1.3 x 10^3	1.2 x 10^4 ± 9.7 x 10^3	1.3 x 10^4 ± 5.4 x 10^3
menthofuran	1.1 x 10^4 ± 1.6 x 10^3	1.4 x 10^7 ± 2.6 x 10^6	4.3 x 10^7 ± 1.4 x 10^7			menthofuran						menthofuran	3.7 x 10^4 ± 9.9 x 10^3	4.4 x 10^5 ± 2.3 x 10^5	8.4 x 10^5 ± 3.5 x 10^5			menthofuran
isomenthone		3.9 x 10^4 ± 1.2 x 10^4	2.3 x 10^5 ± 9.4 x 10^4			isomenthone						isomenthone	4.1 x 10^3 ± 2.2 x 10^3	2.9 x 10^7 ± 3.8 x 10^6	1.0 x 10^8 ± 3.5 x 10^7			isomenthone
neomenthol		1.3 x 10^5 ± 1.3 x 10^4	5.6 x 10^5 ± 1.7 x 10^5			neomenthol						neomenthol		9.8 x 10^4 ± 5.1 x 10^4				neomenthol
d-terpineol						d-terpineol			9.6 x 10^3 ± 6.5 x 10^3			d-terpineol	1.1 x 10^4 ± 4.9 x 10^3	6.2 x 10^4 ± 1.5 x 10^4	4.9 x 10^5 ± 1.8 x 10^5			d-terpineol		4.9 x 10^3 ± 1.8 x 10^3	5.3 x 10^3 ± 2.3 x 10^3
borneol	2.1 x 10^4 ± 8.7 x 10^3	4.5 x 10^4 ± 2.0 x 10^4				borneol	2.1 x 10^4 ± 1.8 x 10^4	6.4 x 10^3 ± 1.3 x 10^3	1.0 x 10^4 ± 6.0 x 10^3			borneol	3.9 x 10^4 ± 1.6 x 10^4	9.1 x 10^5 ± 2.7 x 10^5	7.2 x 10^6 ± 1.9 x 10^6			borneol	1.3 x 10^5 ± 3.4 x 10^4	2.9 x 10^6 ± 2.5 x 10^6	6.3 x 10^6 ± 2.7 x 10^6
trans-isopulegone						trans-isopulegone						trans-isopulegone		1.9 x 10^5 ± 6.6 x 10^4	1.9 x 10^6 ± 3.1 x 10^5			trans-isopulegone		2.7 x 10^4 ± 1.2 x 10^4	2.3 x 10^4 ± 9.0 x 10^3
menthol	1.5 x 10^4 ± 4.9 x 10^3	1.3 x 10^6 ± 1.6 x 10^5	6.5 x 10^6 ± 2.3 x 10^6			menthol	1.6 x 10^3 ± 1.3 x 10^3	6.9 x 10^2 ± 6.9 x 10^2				menthol		2.3 x 10^4 ± 8.8 x 10^3				menthol
terpinen-4-ol	3.6 x 10^3 ± 5.2 x 10^2	7.7 x 10^3 ± 5.2 x 10^3				terpinen-4-ol	5.2 x 10^3 ± 2.0 x 10^3	9.9 x 10^3 ± 4.0 x 10^3	4.1 x 10^4 ± 1.5 x 10^4			terpinen-4-ol	9.3 x 10^3 ± 3.5 x 10^3	6.1 x 10^4 ± 1.1 x 10^4	1.9 x 10^5 ± 4.3 x 10^4			terpinen-4-ol	1.2 x 10^4 ± 3.3 x 10^3	1.4 x 10^5 ± 8.6 x 10^4	1.4 x 10^5 ± 6.7 x 10^4
cis-isopulegone						cis-isopulegone						cis-isopulegone		2.5 x 10^3 ± 2.5 x 10^3	7.3 x 10^3 ± 7.3 x 10^3			cis-isopulegone
isomenthol		2.0 x 10^4 ± 2.6 x 10^3	7.7 x 10^4 ± 2.8 x 10^4			isomenthol						isomenthol		1.1 x 10^4 ± 4.3 x 10^3				isomenthol
neoisomenthol		2.2 x 10^3 ± 1.3 x 10^3	1.0 x 10^4 ± 4.3 x 10^3			neoisomenthol						neoisomenthol		1.0 x 10^4 ± 5.4 x 10^3				neoisomenthol
a-terpineol	4.8 x 10^3 ± 2.0 x 10^3	3.5 x 10^3 ± 1.5 x 10^3	2.1 x 10^3 ± 2.1 x 10^3			a-terpineol	2.2 x 10^3 ± 2.2 x 10^3	4.7 x 10^2 ± 4.7 x 10^2	5.6 x 10^3 ± 3.8 x 10^3			a-terpineol	2.1 x 10^4 ± 9.5 x 10^3	2.8 x 10^5 ± 4.9 x 10^4	1.7 x 10^6 ± 6.4 x 10^5			a-terpineol
myrtenal						myrtenal	6.3 x 10^2 ± 4.1 x 10^2					myrtenal						myrtenal		6.0 x 10^4 ± 3.2 x 10^4	1.5 x 10^5 ± 5.2 x 10^4
cis-dihydrocarvone						cis-dihydrocarvone		1.2 x 10^5 ± 6.4 x 10^4	9.9 x 10^4 ± 5.0 x 10^4			cis-dihydrocarvone						cis-dihydrocarvone		4.7 x 10^6 ± 2.7 x 10^6	3.5 x 10^6 ± 1.3 x 10^6
trans-dihydrocarvone						trans-dihydrocarvone		5.1 x 10^3 ± 2.3 x 10^3	8.1 x 10^3 ± 4.3 x 10^3			trans-dihydrocarvone						trans-dihydrocarvone		3.0 x 10^5 ± 1.5 x 10^5	2.7 x 10^5 ± 9.2 x 10^4
trans-carveol						trans-carveol	3.7 x 10^2 ± 3.7 x 10^2	4.7 x 10^4 ± 3.1 x 10^4	3.3 x 10^5 ± 2.9 x 10^5			trans-carveol						trans-carveol		4.2 x 10^5 ± 3.5 x 10^5	2.3 x 10^6 ± 1.3 x 10^6
cis-carveol						cis-carveol		4.6 x 10^3 ± 1.3 x 10^3	2.4 x 10^4 ± 1.6 x 10^4			cis-carveol						cis-carveol		1.3 x 10^5 ± 9.9 x 10^4	3.1 x 10^5 ± 1.7 x 10^5
pulegone	1.4 x 10^2 ± 1.4 x 10^2	3.1 x 10^4 ± 3.0 x 10^4	9.7 x 10^5 ± 5.4 x 10^5			pulegone						pulegone	9.2 x 10^3 ± 4.0 x 10^3	1.5 x 10^7 ± 6.4 x 10^6	1.8 x 10^8 ± 2.7 x 10^7			pulegone
carvone			9.5 x 10^2 ± 9.5 x 10^2			carvone	2.2 x 10^3 ± 1.2 x 10^3	1.2 x 10^6 ± 4.5 x 10^5	2.2 x 10^7 ± 1.2 x 10^7			carvone	6.5 x 10^3 ± 3.9 x 10^3	1.1 x 10^4 ± 5.9 x 10^3	5.1 x 10^4 ± 1.5 x 10^4			carvone	1.9 x 10^4 ± 9.6 x 10^3	1.0 x 10^8 ± 6.3 x 10^7	1.8 x 10^8 ± 3.9 x 10^7
cis-piperitone oxide						cis-piperitone oxide						cis-piperitone oxide			8.7 x 10^4 ± 3.9 x 10^4			cis-piperitone oxide
piperitone		4.9 x 10^3 ± 1.3 x 10^3	3.7 x 10^4 ± 1.1 x 10^4			piperitone		1.8 x 10^3 ± 1.1 x 10^3	4.3 x 10^4 ± 2.8 x 10^4			piperitone	3.5 x 10^2 ± 3.5 x 10^2	5.9 x 10^5 ± 1.1 x 10^5	1.9 x 10^6 ± 8.0 x 10^5			piperitone		8.3 x 10^5 ± 5.9 x 10^5	1.1 x 10^6 ± 2.7 x 10^5
trans-piperitone oxide						trans-piperitone oxide			2.5 x 10^3 ± 2.5 x 10^3			trans-piperitone oxide			4.1 x 10^4 ± 2.3 x 10^4			trans-piperitone oxide
isopiperitenone						isopiperitenone			1.4 x 10^4 ± 1.2 x 10^4			isopiperitenone		3.8 x 10^4 ± 1.0 x 10^4	2.5 x 10^5 ± 5.3 x 10^4			isopiperitenone		2.3 x 10^4 ± 9.1 x 10^3	2.8 x 10^4 ± 9.1 x 10^3
neo-menthyl acetate		8.7 x 10^4 ± 3.5 x 10^4	4.3 x 10^4 ± 2.0 x 10^4			neo-menthyl acetate						neo-menthyl acetate						neo-menthyl acetate
bornyl acetate						bornyl acetate						bornyl acetate			2.2 x 10^3 ± 2.2 x 10^3			bornyl acetate		1.9 x 10^4 ± 1.1 x 10^4	7.1 x 10^4 ± 3.6 x 10^4
menthyl acetate	7.4 x 10^2 ± 4.9 x 10^2	1.3 x 10^6 ± 4.7 x 10^5	5.3 x 10^5 ± 2.0 x 10^5			menthyl acetate						menthyl acetate						menthyl acetate
carvacrol						carvacrol			9.8 x 10^3 ± 9.5 x 10^3			carvacrol						carvacrol		7.6 x 10^4 ± 6.5 x 10^4	7.4 x 10^4 ± 2.6 x 10^4
piperitenone						piperitenone			7.7 x 10^2 ± 7.7 x 10^2			piperitenone		9.5 x 10^4 ± 5.4 x 10^4	1.9 x 10^6 ± 4.4 x 10^5			piperitenone		2.2 x 10^3 ± 2.2 x 10^3	2.8 x 10^4 ± 1.9 x 10^4
piperitenone oxide						piperitenone oxide						piperitenone oxide			1.8 x 10^4 ± 8.1 x 10^3			piperitenone oxide
B-caryophyllene	1.1 x 10^2 ± 1.1 x 10^2	1.2 x 10^4 ± 2.9 x 10^3	3.2 x 10^4 ± 7.8 x 10^3			B-caryophyllene	2.7 x 10^3 ± 2.7 x 10^3	1.7 x 10^4 ± 1.1 x 10^4	8.8 x 10^4 ± 2.1 x 10^4			B-caryophyllene			1.3 x 10^3 ± 1.3 x 10^3			B-caryophyllene		3.2 x 10^3 ± 3.2 x 10^3
(E)-B-farnesene		2.2 x 10^3 ± 2.2 x 10^3	2.2 x 10^4 ± 8.7 x 10^3			(E)-B-farnesene		2.3 x 10^4 ± 1.8 x 10^4	1.2 x 10^5 ± 3.4 x 10^4			(E)-B-farnesene		5.7 x 10^3 ± 3.7 x 10^3	3.1 x 10^4 ± 1.7 x 10^4			(E)-B-farnesene			4.3 x 10^3 ± 4.3 x 10^3
a-humulene						a-humulene						a-humulene						a-humulene
y-muurolene						y-muurolene	8.7 x 10^2 ± 8.7 x 10^2	3.9 x 10^3 ± 3.9 x 10^3	2.3 x 10^4 ± 6.8 x 10^3			y-muurolene	1.1 x 10^2 ± 1.1 x 10^2	3.5 x 10^4 ± 6.0 x 10^3	1.3 x 10^5 ± 3.2 x 10^4			y-muurolene		5.0 x 10^4 ± 1.9 x 10^4	5.4 x 10^4 ± 1.1 x 10^4
germacrene D		4.2 x 10^3 ± 1.8 x 10^3	1.8 x 10^4 ± 3.6 x 10^3			germacrene D	1.1 x 10^3 ± 1.1 x 10^3	2.8 x 10^4 ± 2.2 x 10^4	1.4 x 10^5 ± 5.9 x 10^4			germacrene D		1.0 x 10^5 ± 1.6 x 10^4	6.6 x 10^5 ± 2.7 x 10^5			germacrene D		1.8 x 10^5 ± 5.8 x 10^4	2.7 x 10^5 ± 8.0 x 10^4
bicyclogermacrene	5.6 x 10^1 ± 5.6 x 10^1					bicyclogermacrene						bicyclogermacrene						bicyclogermacrene		2.3 x 10^4 ± 8.5 x 10^3	1.7 x 10^4 ± 7.8 x 10^3
a-muurolene	8.6 x 10^2 ± 3.6 x 10^2					a-muurolene	1.1 x 10^3 ± 5.9 x 10^2	1.5 x 10^3 ± 1.5 x 10^3	5.1 x 10^3 ± 3.1 x 10^3			a-muurolene	1.8 x 10^3 ± 1.9 x 10^2	1.7 x 10^4 ± 2.4 x 10^3	6.1 x 10^4 ± 1.6 x 10^4			a-muurolene	8.4 x 10^2 ± 5.2 x 10^2	2.1 x 10^4 ± 7.6 x 10^3	2.0 x 10^4 ± 3.1 x 10^3
y-cadinene	7.6 x 10^2 ± 5.0 x 10^2	6.1 x 10^2 ± 6.1 x 10^2	8.7 x 10^2 ± 8.7 x 10^2			y-cadinene	9.8 x 10^2 ± 9.8 x 10^2	3.3 x 10^3 ± 3.3 x 10^3	1.8 x 10^4 ± 5.7 x 10^3			y-cadinene	2.9 x 10^3 ± 8.4 x 10^2	3.2 x 10^4 ± 5.2 x 10^3	1.2 x 10^5 ± 2.6 x 10^4			y-cadinene	1.3 x 10^3 ± 1.1 x 10^3	4.3 x 10^4 ± 1.5 x 10^4	3.8 x 10^4 ± 1.2 x 10^4
d-cadinene	8.0 x 10^2 ± 4.6 x 10^2	2.0 x 10^3 ± 1.2 x 10^3	7.6 x 10^3 ± 1.5 x 10^3			d-cadinene	1.7 x 10^3 ± 1.3 x 10^3	8.2 x 10^3 ± 5.8 x 10^3	4.2 x 10^4 ± 1.3 x 10^4			d-cadinene	3.3 x 10^3 ± 7.7 x 10^2	6.1 x 10^4 ± 1.0 x 10^4	2.8 x 10^5 ± 7.5 x 10^4			d-cadinene	2.0 x 10^3 ± 1.0 x 10^3	8.5 x 10^4 ± 3.1 x 10^4	8.2 x 10^4 ± 2.3 x 10^4
a-cadinene	1.8 x 10^2 ± 1.8 x 10^2					a-cadinene	3.1 x 10^2 ± 3.1 x 10^2	1.1 x 10^3 ± 1.1 x 10^3	5.9 x 10^3 ± 2.4 x 10^3			a-cadinene	5.0 x 10^2 ± 5.0 x 10^2	9.9 x 10^3 ± 1.7 x 10^3	3.6 x 10^4 ± 7.5 x 10^3			a-cadinene	8.3 x 10^2 ± 5.1 x 10^2	1.5 x 10^4 ± 5.7 x 10^3	1.5 x 10^4 ± 4.2 x 10^3
Response ÷ d.w.	8.7 x 10^4 ± 2.1 x 10^4	1.9 x 10^7 ± 2.8 x 10^6	6.2 x 10^7 ± 1.9 x 10^7			Response ÷ d.w.	8.4 x 10^4 ± 3.6 x 10^4	2.2 x 10^6 ± 1.0 x 10^6	2.9 x 10^7 ± 1.4 x 10^7			Response ÷ d.w.	1.7 x 10^5 ± 3.8 x 10^4	5.7 x 10^7 ± 9.2 x 10^6	3.1 x 10^8 ± 6.6 x 10^7			Response ÷ d.w.	2.3 x 10^5 ± 6.0 x 10^4	1.3 x 10^8 ± 6.8 x 10^7	2.2 x 10^8 ± 4.8 x 10^7
Fold diff. Rhiz.-to-Root ÷ d.w.		213				Fold diff. Rhiz.-to-Root ÷ d.w.		27				Fold diff. Rhiz.-to-Root ÷ d.w.		336				Fold diff. Rhiz.-to-Root ÷ d.w.		574
Fold diff. S-to-Root ÷ d.w.			706			Fold diff. S-to-Root ÷ d.w.			340			Fold diff. S-to-Root ÷ d.w.			1855			Fold diff. S-to-Root ÷ d.w.			951
Fold diff. S-to-Rhiz. ÷ d.w.			3.31			Fold diff. S-to-Rhiz. ÷ d.w.			12.77			Fold diff. S-to-Rhiz. ÷ d.w.			5.53			Fold diff. S-to-Rhiz. ÷ d.w.			1.66

## Sheet: Peppermint
					% Total Response						Peak Area per mg d.w.						d.w (mg)													% Total Response						Peak Area per mg d.w.						d.w (mg)
Root	% Total Response		Peak Area per mg d.w.														11	17	24	22	29				Root	% Total Response		Peak Area per mg d.w.		X						X						17	23	6	18	21
BMPM - Control	Avg.	Std. Error	Avg.	Std. Error	1	2	3	4	5		1	2	3	4	5		1	2	3	4	5				BMPM - Treamtent	Avg.	Std. Error	Avg.	Std. Error	1	2	3	4	5		1	2	3	4	5		1	2	3	4	5			Of Interest
a-thujene	0.530043	0.258038	986.899	438.908	1.06095	0.377556	1.21171	0	0		2219.82	1122.47	1592.21	0	0		24418	19082	38213	0	0				a-thujene	0	0	0	0	0.308049	0	0	0	0		7420.41	0	0	0	0		126147	0	0	0	0
a-pinene	1.91034	1.09044	3263.66	1643.07	3.4574	0.648802	5.44552	0	0		7233.91	1928.88	7155.5	0	0		79573	32791	171732	0	0				a-pinene	0.709786	0.709786	882.315	882.315	0.57624	2.83915	0	0	0		13880.7	3529.26	0	0	0		235972	81173	0	0	0
camphene	1.32708	0.551475	2369.64	1036.51	2.74161	0.776837	2.53586	0.581073	0		5736.27	2309.53	3332.17	470.227	0		63099	39262	79972	10345	0				camphene	0.759331	0.759331	943.902	943.902	0.140465	3.03732	0	0	0		3383.59	3775.61	0	0	0		57521	86839	0	0	0
sabinene	0.518692	0.395246	865.02	554.537	0	0.552899	2.04056	0	0		0	1643.76	2681.33	0	0		0	27944	64352	0	0				sabinene	0.190622	0.190622	236.957	236.957	0.544638	0.762487	0	0	0		13119.5	947.826	0	0	0		223031	21800	0	0	0
1-octen-3-ol	4.3235	0.454075	6752.79	2536.29	3.68716	5.40943	3.18575	5.37761	3.95758		7714.64	16082.2	4186.12	4351.77	1429.24		84861	273397	100467	95739	41448				1-octen-3-ol	3.30181	1.43485	3496.61	2031.96	1.31832	7.57619	1.51971	2.33301	1.77835		31756.4	9417.74	669	2873.56	1026.14		539858	216608	4014	51724	21549			1-octen-3-ol
B-pinene	1.4448	0.812194	2488.52	1168.23	2.29409	0.702066	4.22785	0	0		4799.91	2087.24	5555.46	0	0		52799	35483	133331	0	0				B-pinene	0.67509	0.67509	839.185	839.185	0.703293	2.70036	0	0	0		16941.2	3356.74	0	0	0		288001	77205	0	0	0
3-octanone	0	0	0	0	0	0	0	0	0		0	0	0	0	0		0	0	0	0	0				3-octanone	0	0	0	0	0	0	0	0	0		0	0	0	0	0		0	0	0	0	0
myrcene	2.22519	1.21066	3936.08	2005.46	4.74581	0.824105	5.55603	0	0		9929.64	2450.06	7300.71	0	0		109226	41651	175217	0	0				myrcene	0.908571	0.641008	1050.59	818.438	0.287749	2.80812	0	0.3589	0.46726		6931.41	3490.7	0	442.056	269.619		117834	80286	0	7957	5662
3-octanol	1.50443	0.660057	1943.53	1185.71	0	2.09901	0	3.38943	2.03369		0	6240.35	0	2742.86	734.448		0	106086	0	60343	21299				3-octanol	2.61087	0.437462	2422.75	779.459	0.425838	2.39166	1.48412	3.47497	3.09273		10257.8	2973	653.333	4280.11	1784.57		174382	68379	3920	77042	37476
a-phellandrene	0	0	0	0	0	0	0	0	0		0	0	0	0	0		0	0	0	0	0				a-phellandrene	0	0	0	0	0.0523244	0	0	0	0		1260.41	0	0	0	0		21427	0	0	0	0
a-terpinene	1.99425	0.40415	2388.63	551.987	1.8201	0.703055	2.6985	1.74884	3.00074		3808.18	2090.18	3545.88	1415.23	1083.69		41890	35533	85101	31135	31427				a-terpinene	1.36425	0.519462	1381.18	619.134	0.296569	2.40715	0	1.18022	1.86962		7143.88	2992.26	0	1453.67	1078.81		121446	68822	0	26166	22655
p-cymene	8.44922	3.13937	11183.9	4871.98	9.60106	1.43114	19.5703	3.69494	7.94866		20088.3	4254.76	25715.7	2990.09	2870.59		220971	72331	617177	65782	83247				p-cymene	4.71011	2.1012	4624.29	2877.02	0.595119	10.603	2.12964	1.30606	4.80176		14335.5	13180.3	937.5	1608.67	2770.71		243703	303146	5625	28956	58185			p-cymene
limonene	1.94038	0.717456	3126.48	1287.28	3.21782	0.90784	4.10221	0.620504	0.853522		6732.64	2699	5390.38	502.136	308.241		74059	45883	129369	11047	8939				limonene	0.66289	0.229277	661.963	258.842	6.30254	0.979341	0	0.711125	0.961094		151818	1217.39	0	875.889	554.571		2580911	28000	0	15766	11646
1,8-cineole	6.05386	2.00815	8750.83	4040.66	11.3201	3.58848	3.28605	1.61122	10.4634		23685.1	10668.5	4317.92	1303.86	3778.76		260536	181365	103630	28685	109584				1,8-cineole	3.29137	1.013	2616.83	650.15	1.10034	3.13141	6.13867	2.48172	1.41366		26505.4	3892.57	2702.33	3056.72	815.714		450592	89529	16214	55021	17130			1,8-cineole
y-terpinene	4.35171	0.808805	5161.58	1048.95	4.01177	1.64265	4.90931	4.54518	6.64962		8393.82	4883.59	6450.92	3678.14	2401.45		92332	83021	154822	80919	69642				y-terpinene	3.05938	1.15919	2953.09	1178.03	0.759808	4.63683	0	2.53972	5.06097		18302.6	5763.91	0	3128.17	2920.29		311144	132570	0	56307	61326
trans-sabinene hydrate	0.291281	0.188945	689.748	532.699	0	0.925271	0.531132	0	0		0	2750.82	697.917	0	0		0	46764	16750	0	0				trans-sabinene hydrate	0.302485	0.302485	376.011	376.011	0.658068	1.20994	0	0	0		15851.8	1504.04	0	0	0		269481	34593	0	0	0
terpinolene	1.73629	0.722477	2780.88	1182.81	2.90551	0.555273	3.86233	1.35835	0		6079.18	1650.82	5075.17	1099.23	0		66871	28064	121804	24183	0				terpinolene	1.33699	0.920725	1421.43	1160.32	0.28337	3.90334	0	0	1.44461		6825.94	4852.13	0	0	833.571		116041	111599	0	0	17505
linalool	0	0	0	0	0	0	0	0	0		0	0	0	0	0		0	0	0	0	0				linalool	0	0	0	0	0.0525466	0	0	0	0		1265.76	0	0	0	0		21518	0	0	0	0
camphor	3.48106	1.26828	5156.65	2419.95	6.05685	0.654401	6.95676	1.50422	2.23306		12672.7	1945.53	9141.29	1217.27	806.448		139400	33074	219391	26780	23387				camphor	1.70317	0.964192	1750.76	1192.67	0.137376	4.21732	0	0.40175	2.19362		3309.18	5242.43	0	494.833	1265.76		56256	120576	0	8907	26581
menthone	0.158966	0.103682	382.727	236.977	0.51027	0.284562	0	0	0		1067.64	846	0	0	0		11744	14382	0	0	0				menthone	0	0	0	0	0.760167	0	0	0	0		18311.2	0	0	0	0		311291	0	0	0	0
pinocarvone	0	0	0	0	0	0	0	0	0		0	0	0	0	0		0	0	0	0	0				pinocarvone	1.38197	1.38197	1702.17	1702.17	0	0	0	5.52788	0		0	0	0	6808.67	0		0	0	0	122556	0
menthofuran	17.9613	4.24759	28799.6	13436.2	11.0769	27.1209	8.87245	29.2334	13.5027		23176.1	80630.2	11658.5	23656.8	4876.38		254937	1370714	279805	520450	141415				menthofuran	17.2927	6.66837	11123.6	1602.68	64.3187	7.62687	35.1608	6.58595	19.7971		1.54934e+06	9480.74	15478.3	8111.89	11423.3		26338708	218057	92870	146014	239890			menthofuran
isomenthone	0.270934	0.16624	549.096	365.015	0.926776	0.212719	0.0711559	0.0635277	0.0804921		1939.09	632.412	93.5	51.4091	29.069		21330	10751	2244	1131	843				isomenthone	0	0	0	0	0.154951	0	0	0	0		3732.53	0	0	0	0		63453	0	0	0	0
neomenthol	0.142063	0.142063	422.353	422.353	0	0.710316	0	0	0		0	2111.76	0	0	0		0	35900	0	0	0				neomenthol	0	0	0	0	0.279805	0	0	0	0		6740.06	0	0	0	0		114581	0	0	0	0
d-terpineol	0	0	0	0	0	0	0	0	0		0	0	0	0	0		0	0	0	0	0				d-terpineol	0	0	0	0	0	0	0	0	0		0	0	0	0	0		0	0	0	0	0
borneol	4.45281	0.360892	6191.41	1710.67	3.60774	4.04164	3.9997	5.14102	5.47394		7548.45	12015.8	5255.67	4160.32	1976.86		83033	204268	126136	91527	57329				borneol	22.4965	6.43127	21482.4	8693.06	0.777198	16.6663	7.64929	36.5854	29.0849		18721.5	20717.4	3367.33	45062.1	16782.6		318265	476501	20204	811118	352434			borneol
trans-isopulegone	0	0	0	0	0	0	0	0	0		0	0	0	0	0		0	0	0	0	0				trans-isopulegone	0	0	0	0	0	0	0	0	0		0	0	0	0	0		0	0	0	0	0
menthol	25.4356	7.16787	37699.6	19842.3	13.1566	38.7385	3.62305	33.835	37.8247		27527.5	115169	4760.75	27380.6	13660		302803	1957875	114258	602374	396141				menthol	18.9912	5.46732	15273.6	4878.06	4.04935	9.39598	32.3028	23.5567	10.7094		97542.4	11679.9	14220.2	29014.7	6179.52		1658221	268637	85321	522265	129770			menthol
terpinen-4-ol	1.38271	0.394088	2295	743.695	2.12568	1.01534	1.89384	1.8787	0		4447.55	3018.59	2488.54	1520.32	0		48923	51316	59725	33447	0				terpinen-4-ol	4.83866	1.37539	3612.32	522.474	0.411303	3.40353	8.96342	3.42243	3.56527		9907.65	4230.83	3945.83	4215.39	2057.24		168430	97309	23675	75877	43202
cis-isopulegone	0	0	0	0	0	0	0	0	0		0	0	0	0	0		0	0	0	0	0				cis-isopulegone	0	0	0	0	0	0	0	0	0		0	0	0	0	0		0	0	0	0	0
isomenthol	0.0525595	0.0525595	156.259	156.259	0	0.262797	0	0	0		0	781.294	0	0	0		0	13282	0	0	0				isomenthol	0	0	0	0	0.0395992	0	0	0	0		953.882	0	0	0	0		16216	0	0	0	0
neoisomenthol	0	0	0	0	0	0	0	0	0		0	0	0	0	0		0	0	0	0	0				neoisomenthol	0	0	0	0	0	0	0	0	0		0	0	0	0	0		0	0	0	0	0
a-terpineol	0.592554	0.592554	479.518	479.518	0	0	0	2.96277	0		0	0	0	2397.59	0		0	0	0	52747	0				a-terpineol	5.05625	1.46861	4793.73	2036.73	0.132333	3.28989	2.06225	8.54712	6.32576		3187.71	4089.57	907.833	10527.4	3650.1		54191	94060	5447	189494	76652			a-terpineol
myrtenal	0	0	0	0	0	0	0	0	0		0	0	0	0	0		0	0	0	0	0				myrtenal	0	0	0	0	0	0	0	0	0		0	0	0	0	0		0	0	0	0	0
cis-dihydrocarvone	0	0	0	0	0	0	0	0	0		0	0	0	0	0		0	0	0	0	0				cis-dihydrocarvone	0	0	0	0	0	0	0	0	0		0	0	0	0	0		0	0	0	0	0
trans-dihydrocarvone	0	0	0	0	0	0	0	0	0		0	0	0	0	0		0	0	0	0	0				trans-dihydrocarvone	0	0	0	0	0	0	0	0	0		0	0	0	0	0		0	0	0	0	0
trans-carveol	0	0	0	0	0	0	0	0	0		0	0	0	0	0		0	0	0	0	0				trans-carveol	0	0	0	0	0	0	0	0	0		0	0	0	0	0		0	0	0	0	0
cis-carveol	0	0	0	0	0	0	0	0	0		0	0	0	0	0		0	0	0	0	0				cis-carveol	0	0	0	0	0	0	0	0	0		0	0	0	0	0		0	0	0	0	0
pulegone	2.4988	0.811733	3698.25	1941.67	5.3471	0.479098	2.86948	1.64453	2.15381		11187.7	1424.35	3770.54	1330.82	777.828		123065	24214	90493	29278	22557				pulegone	0.11301	0.11301	139.194	139.194	6.3472	0	0	0.452042	0		152894	0	0	556.778	0		2599200	0	0	10022	0
carvone	0.0676235	0.0676235	88.8583	88.8583	0	0	0.338117	0	0		0	0	444.292	0	0		0	0	10663	0	0				carvone	0	0	0	0	0	0	0	0	0		0	0	0	0	0		0	0	0	0	0
cis-piperitone oxide	0	0	0	0	0	0	0	0	0		0	0	0	0	0		0	0	0	0	0				cis-piperitone oxide	0	0	0	0	0	0	0	0	0		0	0	0	0	0		0	0	0	0	0
piperitone	0	0	0	0	0	0	0	0	0		0	0	0	0	0		0	0	0	0	0				piperitone	0	0	0	0	0	0	0	0	0		0	0	0	0	0		0	0	0	0	0
trans-piperitone oxide	0	0	0	0	0	0	0	0	0		0	0	0	0	0		0	0	0	0	0				trans-piperitone oxide	0	0	0	0	0	0	0	0	0		0	0	0	0	0		0	0	0	0	0
isopiperitenone	0	0	0	0	0	0	0	0	0		0	0	0	0	0		0	0	0	0	0				isopiperitenone	0	0	0	0	0	0	0	0	0		0	0	0	0	0		0	0	0	0	0
neo-menthyl acetate	0.33855	0.15143	678.935	304.018	0.744549	0.356187	0.592014	0	0		1557.82	1058.94	777.917	0	0		17136	18002	18670	0	0				neo-menthyl acetate	0	0	0	0	0.512413	0	0	0	0		12343.2	0	0	0	0		209835	0	0	0	0
bornyl acetate	0	0	0	0	0	0	0	0	0		0	0	0	0	0		0	0	0	0	0				bornyl acetate	0	0	0	0	0	0	0	0	0		0	0	0	0	0		0	0	0	0	0
menthyl acetate	1.38084	0.677917	3276.16	2128.72	1.61845	3.84625	1.09118	0	0.348322		3386.27	11434.9	1433.83	0	125.793		37249	194393	34412	0	3648				menthyl acetate	1.0764	0.855217	739.937	490.979	7.4514	0.71366	0	0	3.59193		179492	887.13	0	0	2072.62		3051372	20404	0	0	43525			menthyl acetate
carvacrol	0	0	0	0	0	0	0	0	0		0	0	0	0	0		0	0	0	0	0				carvacrol	0	0	0	0	0	0	0	0	0		0	0	0	0	0		0	0	0	0	0
piperitenone	0	0	0	0	0	0	0	0	0		0	0	0	0	0		0	0	0	0	0				piperitenone	0	0	0	0	0	0	0	0	0		0	0	0	0	0		0	0	0	0	0
piperitenone oxide	0	0	0	0	0	0	0	0	0		0	0	0	0	0		0	0	0	0	0				piperitenone oxide	0	0	0	0	0	0	0	0	0		0	0	0	0	0		0	0	0	0	0
B-caryophyllene	0.231304	0.0975476	475.1	207.515	0.455263	0.30229	0.398968	0	0		952.545	898.706	524.25	0	0		10478	15278	12582	0	0				B-caryophyllene	0.0904667	0.0904667	112.457	112.457	0.0583512	0.361867	0	0	0		1405.59	449.826	0	0	0		23895	10346	0	0	0
(E)-B-farnesene	0	0	0	0	0	0	0	0	0		0	0	0	0	0		0	0	0	0	0				(E)-B-farnesene	0	0	0	0	0	0	0	0	0		0	0	0	0	0		0	0	0	0	0
a-humulene	0	0	0	0	0	0	0	0	0		0	0	0	0	0		0	0	0	0	0				a-humulene	0	0	0	0	0	0	0	0	0		0	0	0	0	0		0	0	0	0	0
y-muurolene	0.101844	0.101844	133.825	133.825	0	0	0.509221	0	0		0	0	669.125	0	0		0	0	16059	0	0				y-muurolene	0	0	0	0	0	0	0	0	0		0	0	0	0	0		0	0	0	0	0
germacrene D	0	0	0	0	0	0	0	0	0		0	0	0	0	0		0	0	0	0	0				germacrene D	0	0	0	0	0	0	0	0	0		0	0	0	0	0		0	0	0	0	0
bicyclogermacrene	0	0	0	0	0	0	0	0	0		0	0	0	0	0		0	0	0	0	0				bicyclogermacrene	0.0455222	0.0455222	56.0694	56.0694	0	0	0	0.182089	0		0	0	0	224.278	0		0	0	0	4037	0
a-muurolene	0.427465	0.25352	729.809	339.956	0.484591	0.279338	1.3734	0	0		1013.91	830.471	1804.67	0	0		11153	14118	43312	0	0				a-muurolene	1.25572	0.531625	860.114	357.396	0.0510277	1.34583	2.58927	0	1.08777		1229.18	1672.96	1139.83	0	627.667		20896	38478	6839	0	13181
y-cadinene	1.08511	0.403591	1402.8	591.958	1.42327	0.257099	2.01415	0	1.73101		2977.91	764.353	2646.62	0	625.138		32757	12994	63519	0	18129				y-cadinene	0.837109	0.483335	764.009	498.64	0.0533842	1.68744	0	0	1.66099		1285.94	2097.61	0	0	958.429		21861	48245	0	0	20127
d-cadinene	1.1381	0.265918	1371.7	408.659	1.23905	0.294178	1.60282	0.809683	1.74476		2592.45	874.588	2106.12	655.227	630.103		28517	14868	50547	14415	18273				d-cadinene	0.791234	0.384037	800.508	464.446	0.0601949	1.71878	0	0.352856	1.0933		1450	2136.57	0	434.611	630.857		24650	49141	0	7823	13248
a-cadinene	0.198823	0.128867	317.844	194.935	0.363541	0	0.630573	0	0		760.636	0	828.583	0	0		8367	0	19886	0	0				a-cadinene	0.14656	0.14656	182.185	182.185	0	0.586241	0	0	0		0	728.739	0	0	0		0	16761	0	0	0
																																																	Other
Response ÷ d.w.	150994	46523	150994	46523	209230	297299	131402	80924	36114.1		209230	297299	131402	80924	36114.1										Response ÷ d.w.	87300	21223	87300	21223	2.40884e+06	124307	44021.5	123170	57702.1		2.40884e+06	124307	44021.5	123170	57702.1									Response ÷ d.w.
Fold diff. T-to-C ÷ d.w.	0.58		0.58
					% Total Response						Peak Area per mg d.w.						d.w (mg)													% Total Response						Peak Area per mg d.w.						d.w (mg)
Rhizome	% Total Response		Peak Area per mg d.w.														4	2	6	4	6				Rhizome	% Total Response		Peak Area per mg d.w.														3	4	5	6	4
BMPM - Control	Avg.	Std. Error	Avg.	Std. Error	1	2	3	4	5		1	2	3	4	5		1	2	3	4	5				BMPM - Treamtent	Avg.	Std. Error	Avg.	Std. Error	1	2	3	4	5		1	2	3	4	5		1	2	3	4	5			Of Interest
a-thujene	0.134357	0.0363905	49521.1	23483.8	0.232929	0.181773	0.125484	0.116005	0.0155923		64376.2	134378	26194	19894.5	2762.17		257505	268757	157164	79578	16573				a-thujene	0.218462	0.07586	40686.1	12775.6	0.257435	0.392566	0.354427	0.0878813	0		66475.7	57092	58283.2	21579.7	0		199427	228368	291416	129478	0
a-pinene	0.337416	0.0903875	112304	44008.1	0.680591	0.332589	0.294257	0.199152	0.180489		188100	245871	61424.2	34154	31973.5		752399	491742	368545	136616	191841				a-pinene	0.685517	0.202765	122104	38197.8	0.871728	1.32333	0.68223	0.126869	0.423427		225100	192456	112188	31153.2	49622.8		675300	769824	560941	186919	198491
camphene	0.00416804	0.00416804	1151.95	1151.95	0.0208402	0	0	0	0		5759.75	0	0	0	0		23039	0	0	0	0				camphene	0.0352386	0.0121571	6794.85	2272.39	0.0509715	0.0699636	0.0361425	0.0191152	0		13162	10175	5943.4	4693.83	0		39486	40700	29717	28163	0
sabinene	0.289376	0.088652	97349	39654.9	0.620432	0.287972	0.253831	0.181501	0.103143		171473	212888	52985.5	31127	18271.7		685893	425775	317913	124508	109630				sabinene	0.52213	0.101618	87444.5	12344.3	0.394688	0.697086	0.689881	0.181728	0.647268		101917	101379	113446	44624.2	75855.2		305752	405517	567232	267745	303421
1-octen-3-ol	0.626431	0.372189	354291	299311	0.2721	2.09738	0.344489	0.0456815	0.372498		75202.2	1.55052e+06	71909.7	7834.25	65987.7		300809	3101041	431458	31337	395926				1-octen-3-ol	0.608309	0.280928	112719	41519	0.545302	1.65859	0.297355	0.540302	0		140809	241213	48898	132674	0		422428	964851	244490	796042	0			1-octen-3-ol
B-pinene	0.507505	0.164769	174292	73856.9	1.11896	0.530276	0.447335	0.230141	0.210812		309256	392014	93378	39468.5	37345.2		1237023	784027	560268	157874	224071				B-pinene	0.906363	0.245827	158604	43510.6	1.01707	1.68183	0.999086	0.185292	0.648537		262631	244593	164293	45499.3	76004		787892	978373	821465	272996	304016
3-octanone	0.00536764	0.00536764	3968.1	3968.1	0	0.0268382	0	0	0		0	19840.5	0	0	0		0	39681	0	0	0				3-octanone	0	0	0	0	0	0	0	0	0		0	0	0	0	0		0	0	0	0	0
myrcene	0.0949599	0.0339697	28811.2	10650.6	0.217566	0.0620651	0.117922	0.045317	0.0319298		60130.2	45882.5	24615.3	7771.75	5656.33		240521	91765	147692	31087	33938				myrcene	0.148998	0.0346305	27126.9	7194	0.18561	0.218793	0.207753	0.0479526	0.0848792		47928.7	31819.8	34163.6	11775	9947.25		143786	127279	170818	70650	39789
3-octanol	0.173795	0.0700002	84347.1	60614.1	0.162794	0.440177	0.140241	0.0384787	0.0872861		44992.5	325407	29274.3	6599	15462.7		179970	650814	175646	26396	92776				3-octanol	0.201169	0.0542071	34977.7	7332.16	0.129013	0.41684	0.142331	0.158296	0.159365		33314	60622.2	23405.4	38870.3	18676.5		99942	242489	117027	233222	74706
a-phellandrene	0.0101054	0.00695518	5855.27	5098.09	0	0.0353034	0.0152237	0	0		0	26098.5	3177.83	0	0		0	52197	19067	0	0				a-phellandrene	0.0308337	0.00929775	5972.65	1781.89	0.0413519	0.0469323	0.0470764	0.0188078	0		10678	6825.5	7741.4	4618.33	0		32034	27302	38707	27710	0
a-terpinene	0.0918707	0.023297	37753.2	21799.4	0.120571	0.166357	0.0726332	0.0670608	0.0327313		33323	122982	15161.7	11500.8	5798.33		133292	245964	90970	46003	34790				a-terpinene	0.164215	0.0341416	30669	7569.91	0.209323	0.231769	0.217832	0.0838469	0.0783024		54052	33706.8	35821	20589	9176.5		162156	134827	179105	123534	36706
p-cymene	0.176591	0.0408567	63708.9	28717.3	0.285151	0.227677	0.20377	0.103174	0.0631821		78809.2	168313	42535.7	17694	11192.7		315237	336626	255214	70776	67156				p-cymene	0.339358	0.0925557	64953.9	21475.1	0.531329	0.500044	0.433046	0.127776	0.104595		137201	72722.8	71211.6	31376	12257.8		411604	290891	356058	188256	49031			p-cymene
limonene	1.34691	0.757447	370972	166148	0.68783	0.815553	4.36198	0.47013	0.399069		190100	602908	910533	80626	70694.8		760402	1205817	5463196	322504	424169				limonene	1.21197	0.559319	262590	155204	3.40631	0.877314	0.935388	0.416103	0.42475		879588	127590	153818	102176	49777.8		2638763	510361	769092	613057	199111
1,8-cineole	1.83783	0.718432	642889	289936	4.49259	1.94893	1.57142	0.772909	0.403332		1.24165e+06	1440772	328022	132552	71450		4966593	2881544	1968135	530207	428700				1,8-cineole	3.23988	0.775318	523670	77264.3	1.35193	3.30407	4.75319	1.64644	5.14374		349100	480520	781631	404290	602811		1047300	1922081	3908155	2425740	2411244			1,8-cineole
y-terpinene	0.242601	0.058131	96808.2	53365.8	0.314834	0.411892	0.234741	0.182096	0.0694405		87013	304497	49000.5	31229	12301.3		348052	608994	294003	124916	73808				y-terpinene	0.432135	0.0832384	81469.6	20233.1	0.575035	0.587422	0.539493	0.241157	0.217566		148487	85430.5	88716	59217.2	25497.2		445461	341722	443580	355303	101989
trans-sabinene hydrate	0.237838	0.0964706	85675.6	40360.6	0.581258	0.275188	0.169345	0	0.163398		160646	203436	35349.5	0	28945.8		642585	406873	212097	0	173675				trans-sabinene hydrate	0.342176	0.169601	58763.1	27001.7	0.253914	0.596444	0.86052	0	0		65566.3	86742.5	141507	0	0		196699	346970	707534	0	0
terpinolene	0.0586236	0.0167821	22053.7	10840.2	0.0917261	0.0838808	0.0739594	0.0435517	0		25351	62010	15438.5	7469	0		101404	124020	92631	29876	0				terpinolene	0.104463	0.0164627	18830.4	3249.66	0.106071	0.136432	0.143482	0.0572486	0.0790832		27390	19841.8	23594.6	14057.7	9268		82170	79367	117973	84346	37072
linalool	0	0	0	0	0	0	0	0	0		0	0	0	0	0		0	0	0	0	0				linalool	0.00228261	0.00228261	375.36	375.36	0	0	0.011413	0	0		0	0	1876.8	0	0		0	0	9384	0	0
camphor	0.0190669	0.0129463	4864.1	3515.02	0.0653527	0	0.0299818	0	0		18062	0	6258.5	0	0		72248	0	37551	0	0				camphor	0.0287358	0.0144286	5301.96	2567.55	0.0365886	0.0288518	0.0782385	0	0		9448	4196	12865.8	0	0		28344	16784	64329	0	0
menthone	0.167879	0.0166805	52788	17781.6	0.204433	0.162306	0.140151	0.124879	0.207625		56500.5	119987	29255.5	21416.5	36780.7		226002	239974	175533	85666	220684				menthone	0.346209	0.117625	71696.4	33508.3	0.784217	0.244934	0.390589	0.153049	0.158254		202503	35621.5	64229.8	37582	18546.2		607508	142486	321149	225492	74185
pinocarvone	0	0	0	0	0	0	0	0	0		0	0	0	0	0		0	0	0	0	0				pinocarvone	0	0	0	0	0	0	0	0	0		0	0	0	0	0		0	0	0	0	0
menthofuran	83.0164	4.03403	2.54807e+07	8.36812e+06	72.8152	79.5534	77.6849	93.0482	91.9802		2.01244e+07	58810964	1.62162e+07	1.59575e+07	1.62942e+07		80497779	117621928	97297073	63830066	97765307				menthofuran	73.6415	4.28941	1.39359e+07	2.62379e+06	78.1484	73.8265	57.7665	83.3006	75.1654		20179690	1.07368e+07	9499321	2.04549e+07	8808866		60539070	42947207	47496605	122729126	35235464			menthofuran
isomenthone	0.105025	0.021757	40224.8	20857.5	0.119446	0.164392	0.129164	0.0426945	0.0694273		33012	121529	26962	7322	12299		132048	243058	161772	29288	73794				isomenthone	0.196545	0.0496989	39033.2	12380.3	0.301965	0.113308	0.330114	0.145008	0.0923284		77974.3	16478.8	54285	35607.5	10820.2		233923	65915	271425	213645	43281
neomenthol	0.550202	0.191459	215763	111961	1.13702	0.826958	0.455777	0.104471	0.226788		314245	611340	95140.3	17916.5	40175.3		1256980	1222680	570842	71666	241052				neomenthol	0.714328	0.0880596	126251	13480	0.458167	0.881032	0.938869	0.61409	0.679482		118309	128131	154391	150793	79630.5		354927	512524	771954	904756	318522
d-terpineol	0	0	0	0	0	0	0	0	0		0	0	0	0	0		0	0	0	0	0				d-terpineol	0	0	0	0	0	0	0	0	0		0	0	0	0	0		0	0	0	0	0
borneol	0.136746	0.0352862	36593.4	9620.46	0.248829	0.0616958	0.11151	0.185622	0.0760714		68770.8	45609.5	23277	31833.8	13476		275083	91219	139662	127335	80856				borneol	0.275538	0.133525	44889.4	19522.3	0.198954	0.778074	0.274288	0	0.126377		51374.3	113158	45104.8	0	14810.5		154123	452630	225524	0	59242			borneol
trans-isopulegone	0	0	0	0	0	0	0	0	0		0	0	0	0	0		0	0	0	0	0				trans-isopulegone	0	0	0	0	0	0	0	0	0		0	0	0	0	0		0	0	0	0	0
menthol	5.19561	1.55523	2.13169e+06	1.19408e+06	8.36174	9.0347	4.88892	1.11053	2.58218		2.31099e+06	6.67903e+06	1020527	190453	457432		9243973	13358057	6123162	761813	2744592				menthol	7.11502	0.693732	1.28226e+06	161244	4.79487	8.81628	8.12773	7.26799	6.56825		1238145	1282176	1.33655e+06	1.78469e+06	769753		3714435	5128704	6682753	10708135	3079013			menthol
terpinen-4-ol	0.0264825	0.0191361	15707.4	14291	0	0.0983303	0	0.0340822	0		0	72692	0	5845	0		0	145384	0	23380	0				terpinen-4-ol	0.0353008	0.0219939	7700.6	5188.9	0.101068	0	0.0754363	0	0		26098	0	12405	0	0		78294	0	62025	0	0
cis-isopulegone	0	0	0	0	0	0	0	0	0		0	0	0	0	0		0	0	0	0	0				cis-isopulegone	0	0	0	0	0	0	0	0	0		0	0	0	0	0		0	0	0	0	0
isomenthol	0.100167	0.0357523	43827.6	26870.7	0.147324	0.199633	0.115348	0.011318	0.0272106		40717	147582	24078.2	1941	4820.33		162868	295163	144469	7764	28922				isomenthol	0.113038	0.0138297	20410.3	2576.49	0.0863763	0.149339	0.14355	0.098422	0.0875031		22304.3	21718.8	23605.8	24168	10254.8		66913	86875	118029	145008	41019
neoisomenthol	0.00883122	0.00883122	6528.6	6528.6	0	0.0441561	0	0	0		0	32643	0	0	0		0	65286	0	0	0				neoisomenthol	0.0139388	0.00855637	2166.79	1341.39	0	0.0329688	0.0367251	0	0		0	4794.75	6039.2	0	0		0	19179	30196	0	0
a-terpineol	0.00262484	0.00193952	461.45	343.372	0	0	0	0.00312979	0.0099944		0	0	0	536.75	1770.5		0	0	0	2147	10623				a-terpineol	0.0208565	0.01082	3453.37	1515.89	0.0136575	0.0636978	0.00544382	0.00828532	0.0131983		3526.67	9263.75	895.2	2034.5	1546.75		10580	37055	4476	12207	6187			a-terpineol
myrtenal	0	0	0	0	0	0	0	0	0		0	0	0	0	0		0	0	0	0	0				myrtenal	0	0	0	0	0	0	0	0	0		0	0	0	0	0		0	0	0	0	0
cis-dihydrocarvone	0	0	0	0	0	0	0	0	0		0	0	0	0	0		0	0	0	0	0				cis-dihydrocarvone	0	0	0	0	0	0	0	0	0		0	0	0	0	0		0	0	0	0	0
trans-dihydrocarvone	0	0	0	0	0	0	0	0	0		0	0	0	0	0		0	0	0	0	0				trans-dihydrocarvone	0	0	0	0	0	0	0	0	0		0	0	0	0	0		0	0	0	0	0
trans-carveol	0	0	0	0	0	0	0	0	0		0	0	0	0	0		0	0	0	0	0				trans-carveol	0	0	0	0	0	0	0	0	0		0	0	0	0	0		0	0	0	0	0
cis-carveol	0	0	0	0	0	0	0	0	0		0	0	0	0	0		0	0	0	0	0				cis-carveol	0	0	0	0	0	0	0	0	0		0	0	0	0	0		0	0	0	0	0
pulegone	0.734927	0.723834	156900	150291	0	0.0335354	3.63016	0	0.0109409		0	24791.5	757770	0	1938.17		0	49583	4546621	0	11629				pulegone	0.123555	0.114853	31236.4	29792.9	0.582138	0	0.035639	0	0		150321	0	5860.6	0	0		450964	0	29303	0	0
carvone	0	0	0	0	0	0	0	0	0		0	0	0	0	0		0	0	0	0	0				carvone	0	0	0	0	0	0	0	0	0		0	0	0	0	0		0	0	0	0	0
cis-piperitone oxide	0	0	0	0	0	0	0	0	0		0	0	0	0	0		0	0	0	0	0				cis-piperitone oxide	0	0	0	0	0	0	0	0	0		0	0	0	0	0		0	0	0	0	0
piperitone	0.018928	0.00939443	8490.27	5377.04	0.0443742	0.037862	0	0	0.0124039		12264	27990	0	0	2197.33		49056	55980	0	0	13184				piperitone	0.030949	0.00900804	4898.03	1281.96	0	0.0321128	0.0403081	0.0276069	0.0547174		0	4670.25	6628.4	6779	6412.5		0	18681	33142	40674	25650
trans-piperitone oxide	0	0	0	0	0	0	0	0	0		0	0	0	0	0		0	0	0	0	0				trans-piperitone oxide	0	0	0	0	0	0	0	0	0		0	0	0	0	0		0	0	0	0	0
isopiperitenone	0	0	0	0	0	0	0	0	0		0	0	0	0	0		0	0	0	0	0				isopiperitenone	0	0	0	0	0	0	0	0	0		0	0	0	0	0		0	0	0	0	0
neo-menthyl acetate	0.253753	0.101263	74025.1	29630.6	0.644683	0.131923	0.254429	0.141496	0.0962324		178176	97526	53110.3	24266.2	17047.5		712702	195052	318662	97065	102285				neo-menthyl acetate	0.496769	0.21658	87308.1	35090.6	0.347573	0.155928	1.34385	0.222278	0.414218		89751.3	22677	220987	54581.3	48543.5		269254	90708	1104936	327488	194174
bornyl acetate	0	0	0	0	0	0	0	0	0		0	0	0	0	0		0	0	0	0	0				bornyl acetate	0	0	0	0	0	0	0	0	0		0	0	0	0	0		0	0	0	0	0
menthyl acetate	3.38955	0.791392	924540	237022	6.15464	1.59758	4.01145	2.66403	2.52007		1.701e+06	1181036	837362	456874	446428		6804009	2362072	5024170	1827497	2678569				menthyl acetate	7.53879	3.00646	1.2958e+06	470562	4.08883	2.07623	18.8004	4.19054	8.53791		1.05583e+06	301952	3.09161e+06	1029008	1000583		3167483	1207810	15458034	6174048	4002332			menthyl acetate
carvacrol	0	0	0	0	0	0	0	0	0		0	0	0	0	0		0	0	0	0	0				carvacrol	0	0	0	0	0	0	0	0	0		0	0	0	0	0		0	0	0	0	0
piperitenone	0	0	0	0	0	0	0	0	0		0	0	0	0	0		0	0	0	0	0				piperitenone	0	0	0	0	0	0	0	0	0		0	0	0	0	0		0	0	0	0	0
piperitenone oxide	0	0	0	0	0	0	0	0	0		0	0	0	0	0		0	0	0	0	0				piperitenone oxide	0	0	0	0	0	0	0	0	0		0	0	0	0	0		0	0	0	0	0
B-caryophyllene	0.050045	0.0101239	19719.7	10788.8	0.0568345	0.0840864	0.0493653	0.0343533	0.0255858		15707.8	62162	10304.7	5891.5	4532.5		62831	124324	61828	23566	27195				B-caryophyllene	0.0648056	0.0110868	11799.4	2896.71	0.0857477	0.061286	0.0848998	0.0248356	0.0672587		22142	8913	13961.2	6098.5	7882.25		66426	35652	69806	36591	31529
(E)-B-farnesene	0.0113351	0.0069417	2746.27	1705.72	0.0281029	0	0.0285726	0	0		7767	0	5964.33	0	0		31068	0	35786	0	0				(E)-B-farnesene	0.0136147	0.0136147	2238.84	2238.84	0	0	0.0680733	0	0		0	0	11194.2	0	0		0	0	55971	0	0
a-humulene	0	0	0	0	0	0	0	0	0		0	0	0	0	0		0	0	0	0	0				a-humulene	0	0	0	0	0	0	0	0	0		0	0	0	0	0		0	0	0	0	0
y-muurolene	0	0	0	0	0	0	0	0	0		0	0	0	0	0		0	0	0	0	0				y-muurolene	0	0	0	0	0	0	0	0	0		0	0	0	0	0		0	0	0	0	0
germacrene D	0.02161	0.00680631	7529.78	3243.12	0.0426492	0.0243485	0.0186513	0	0.0224011		11787.2	18000	3893.33	0	3968.33		47149	36000	23360	0	23810				germacrene D	0.0236315	0.0107368	4242.61	1800.26	0.0235288	0	0.0625918	0.00849234	0.0235445		6075.67	0	10292.8	2085.33	2759.25		18227	0	51464	12512	11037
bicyclogermacrene	0	0	0	0	0	0	0	0	0		0	0	0	0	0		0	0	0	0	0				bicyclogermacrene	0	0	0	0	0	0	0	0	0		0	0	0	0	0		0	0	0	0	0
a-muurolene	0	0	0	0	0	0	0	0	0		0	0	0	0	0		0	0	0	0	0				a-muurolene	0	0	0	0	0	0	0	0	0		0	0	0	0	0		0	0	0	0	0
y-cadinene	0.00535598	0.00234766	1896.18	858.372	0.0111379	0.00591399	0.00972807	0	0		3078.25	4372	2030.67	0	0		12313	8744	12184	0	0				y-cadinene	0.00368857	0.00368857	606.56	606.56	0	0	0.0184428	0	0		0	0	3032.8	0	0		0	0	15164	0	0
d-cadinene	0.00973276	0.00400593	3898.67	2085.01	0.0180822	0.0152909	0.0152907	0	0		4997.5	11304	3191.83	0	0		19990	22608	19151	0	0				d-cadinene	0.00968643	0.00602724	1983.67	1222.02	0.020836	0	0.0275961	0	0		5380.33	0	4538	0	0		16141	0	22690	0	0
a-cadinene	0	0	0	0	0	0	0	0	0		0	0	0	0	0		0	0	0	0	0				a-cadinene	0	0	0	0	0	0	0	0	0		0	0	0	0	0		0	0	0	0	0
																																																	Other
Response ÷ d.w.	31460609	10779078	31460609	10779078	2.76377e+07	7.39264e+07	2.08743e+07	1.71497e+07	1.77149e+07		2.76377e+07	7.39264e+07	2.08743e+07	1.71497e+07	1.77149e+07										Response ÷ d.w.	18616933	2793522	18616933	2793522	2.58223e+07	14543283	1.64443e+07	2.45555e+07	1.17193e+07		2.58223e+07	14543283	1.64443e+07	2.45555e+07	1.17193e+07									Response ÷ d.w.
Fold diff. T-to-C ÷ d.w.	0.59		0.59
Fold diff. Rhiz.-to-Root ÷ d.w.	208		208																						Fold diff. Rhiz.-to-Root ÷ d.w.	213		213
					% Total Response						Peak Area per mg d.w.						d.w (mg)													% Total Response						Peak Area per mg d.w.						d.w (mg)
Stem	% Total Response		Peak Area per mg d.w.														3	2	4	3	4				Stem	% Total Response		Peak Area per mg d.w.														3	4	2	3	3
BMPM - Control	Avg.	Std. Error	Avg.	Std. Error	1	2	3	4	5		1	2	3	4	5		1	2	3	4	5				BMPM - Treamtent	Avg.	Std. Error	Avg.	Std. Error	1	2	3	4	5		1	2	3	4	5		1	2	3	4	5			Of Interest
a-thujene	0.135088	0.011135	88336.8	27516	0.160746	0.101774	0.143093	0.11692	0.152906		172303	51186.5	30863	134605	52726.2		516909	102373	123452	403815	210905				a-thujene	0.193477	0.0388276	97978	21980.9	0.34361	0.142524	0.14285	0.194437	0.143965		61850.7	85699.8	166202	47103	129035		185552	342799	332403	141309	387106
a-pinene	0.374346	0.0640723	204776	36277	0.285232	0.412887	0.598589	0.227042	0.347978		305740	207658	129107	261384	119992		917219	415317	516427	784151	479970				a-pinene	0.704561	0.229181	290425	34370	0.933056	0.454218	0.294869	1.50112	0.339539		167952	273121	343070	363652	304328		503857	1092484	686141	1090955	912985
camphene	0.00346796	0.00346796	1195.85	1195.85	0	0	0	0	0.0173398		0	0	0	0	5979.25		0	0	0	0	23917				camphene	0	0	0	0	0	0	0	0	0		0	0	0	0	0		0	0	0	0	0
sabinene	0.35294	0.0311102	219637	61667.1	0.404591	0.373901	0.385608	0.230872	0.369726		433681	188051	83170	265792	127492		1301042	376102	332680	797376	509968				sabinene	0.536838	0.114227	263538	51101.9	0.974197	0.439375	0.353879	0.543183	0.373559		175358	264196	411726	131588	334821		526073	1056784	823452	394763	1004463
1-octen-3-ol	8.32156	3.12411	4.10024e+06	1.49327e+06	3.69777	19.4185	6.83373	1.58393	10.0739		3.96363e+06	9766391	1.47393e+06	1.82351e+06	3.47376e+06		11890886	19532782	5895734	5470523	13895045				1-octen-3-ol	8.97982	1.93173	4.1953e+06	709414	14.8402	10.3156	4.32014	10.3168	5.10635		2.67126e+06	6202787	5026332	2499275	4.57682e+06		8013793	24811148	10052664	7497825	13730455			1-octen-3-ol
B-pinene	0.67349	0.100208	369948	65818.8	0.536708	0.782901	0.942215	0.367322	0.738302		575296	393754	203222	422881	254588		1725889	787509	812887	1268644	1018350				B-pinene	1.14542	0.293967	501918	56178.4	1.71353	0.826109	0.54587	1.98513	0.656484		308440	496739	635101	480903	588406		925319	1986956	1270202	1442710	1765218
3-octanone	0.0353772	0.0224624	24717.8	13036.3	0.0497311	0.11739	0	0.009765	0		53306.7	59040.5	0	11242	0		159920	118081	0	33726	0				3-octanone	0.0671482	0.0191313	28544.6	4479.82	0.100408	0.0536762	0.0367402	0.122715	0.022202		18073.7	32275.5	42746	29728	19899.7		54221	129102	85492	89184	59699
myrcene	0.104959	0.0117273	66634.7	20171.1	0.12863	0.12774	0.105376	0.0646017	0.098449		137878	64246	22728	74373	33948		413635	128492	90912	223119	135792				myrcene	0.139996	0.0380531	68811	14187.7	0.289555	0.129145	0.0881573	0.0938536	0.0992697		52120.7	77654.8	102568	22736.3	88975.3		156362	310619	205136	68209	266926
3-octanol	2.28016	1.11923	1.1615e+06	556643	0.94352	6.64014	1.48133	0.411185	1.9246		1.01136e+06	3339609	319502	473379	663656		3034073	6679218	1278008	1420136	2654626				3-octanol	1.62628	0.326762	810935	160676	2.76452	1.86703	0.895952	1.44009	1.16382		497620	1.12265e+06	1.04241e+06	348867	1.04313e+06		1492860	4490589	2084819	1046600	3129388
a-phellandrene	0.0109035	0.00541494	10942.9	6236.67	0.0263626	0	0	0.0207681	0.00738701		28258	0	0	23909.3	2547.25		84774	0	0	71728	10189				a-phellandrene	0.0184067	0.00683395	10293.1	3244.35	0.0422994	0.0156074	0.0145195	0	0.0196069		7614	9384.75	16893	0	17573.7		22842	37539	33786	0	52721
a-terpinene	0.0783886	0.00900286	56337.1	20830	0.106587	0.0526919	0.0681584	0.0861912	0.0783143		114251	26501	14700.8	99228	27005		342752	53002	58803	297684	108020				a-terpinene	0.100643	0.0217966	51713.1	12131.9	0.187586	0.0770415	0.0748574	0.0846608	0.0790711		33766	46325	87094	20509.3	70871.3		101298	185300	174188	61528	212614
p-cymene	0.155666	0.0136589	93593.1	22745.7	0.154418	0.160769	0.191951	0.107476	0.163718		165520	80857.5	41401	123732	56454.5		496560	161715	165604	371197	225818				p-cymene	0.21806	0.045308	107733	21313.7	0.391552	0.17681	0.14563	0.221472	0.154836		70480.3	106316	169435	53652.3	138779		211441	425263	338870	160957	416338			p-cymene
limonene	0.584039	0.0955651	370820	118339	0.506595	0.273814	0.641557	0.642792	0.855437		543018	137713	138374	740018	294979		1629054	275426	553497	2220053	1179915				limonene	0.633462	0.128265	323931	71348.6	1.11286	0.619264	0.350206	0.509063	0.575921		200317	372363	407453	123322	516198		600950	1489453	814906	369966	1548593
1,8-cineole	2.36678	0.290036	1.52021e+06	517575	3.22165	2.08311	2.58193	1.46583	2.48138		3453283	1047684	556885	1687543	855652		10359849	2095368	2227539	5062629	3422606				1,8-cineole	3.36147	1.26652	1.75583e+06	543300	8.21906	2.04785	2.9097	0.873374	2.75735		1.47945e+06	1.23137e+06	3385337	211578	2.47141e+06		4438351	4925494	6770674	634733	7414229			1,8-cineole
y-terpinene	0.203575	0.0186601	139380	47445.4	0.249619	0.136277	0.202206	0.209545	0.22023		267566	68539.5	43612.8	241240	75941.5		802698	137079	174451	723720	303766				y-terpinene	0.241693	0.0456288	128936	33428.8	0.423639	0.183574	0.200138	0.205386	0.19573		76256	110383	232854	49755.3	175433		228768	441533	465707	149266	526298
trans-sabinene hydrate	0.12737	0.0866628	113886	90955.6	0.437872	0.198979	0	0	0		469354	100075	0	0	0		1408063	200150	0	0	0				trans-sabinene hydrate	0.121347	0.0865945	35558	21959.1	0.443963	0.162773	0	0	0		79914.3	97875.5	0	0	0		239743	391502	0	0	0
terpinolene	0.059675	0.00536822	40987.2	14074.4	0.0808958	0.0543959	0.0571933	0.0521023	0.0537876		86712	27358	12335.8	59983	18547.5		260136	54716	49343	179949	74190				terpinolene	0.066873	0.0121218	36677	9928.36	0.1148	0.0590479	0.0586652	0.049429	0.0524222		20664.3	35505.5	68255	11974.3	46986		61993	142022	136510	35923	140958
linalool	0.00878479	0.00878479	9416.4	9416.4	0.043924	0	0	0	0		47082	0	0	0	0		141246	0	0	0	0				linalool	0.0129765	0.00692894	6016.67	2768.05	0.0378958	0.0144728	0.0125139	0	0		6821.33	8702.5	14559.5	0	0		20464	34810	29119	0	0
camphor	0	0	0	0	0	0	0	0	0		0	0	0	0	0		0	0	0	0	0				camphor	0	0	0	0	0	0	0	0	0		0	0	0	0	0		0	0	0	0	0
menthone	0.781655	0.317916	519239	215132	1.01842	1.93151	0.300592	0.299429	0.358321		1.09165e+06	971440	64833.2	344719	123559		3274937	1942880	259333	1034157	494237				menthone	0.611493	0.134193	443616	225429	0.571511	0.540392	1.13077	0.390856	0.423938		102873	324937	1.31561e+06	94686	379975		308620	1299749	2631217	284058	1139926
pinocarvone	0	0	0	0	0	0	0	0	0		0	0	0	0	0		0	0	0	0	0				pinocarvone	0	0	0	0	0	0	0	0	0		0	0	0	0	0		0	0	0	0	0
menthofuran	66.5946	5.13675	4.52571e+07	1.54888e+07	62.94	52.3049	72.2718	82.7955	62.661		6.74653e+07	26306362	1.5588e+07	9.53187e+07	2.16073e+07		202395784	52612724	62351871	285956053	86429103				menthofuran	66.9716	5.71577	4.34925e+07	1.42608e+07	44.8557	67.4918	72.7261	76.5396	73.2448		8.07413e+06	4.05828e+07	8.46144e+07	1.8542e+07	65649228		24222377	162331065	169228725	55625893	196947684			menthofuran
isomenthone	0.341478	0.0609217	231962	95972.1	0.560511	0.260609	0.323237	0.203444	0.359589		600810	131072	69717.5	234216	123996		1802431	262143	278870	702649	495986				isomenthone	0.333036	0.0519298	233053	94459.7	0.363982	0.311925	0.475101	0.155077	0.359094		65517.7	187560	552764	37568	321856		196553	750241	1105527	112704	965568
neomenthol	0.945934	0.204508	653771	255743	1.47203	0.585652	0.574259	0.68106	1.41666		1577868	294550	123859	784074	488506		4733604	589099	495437	2352222	1954024				neomenthol	0.970184	0.255094	562998	166743	1.80897	1.03807	0.796906	0.219866	0.987104		325618	624194	927173	53263.3	884741		976855	2496775	1854346	159790	2654222
d-terpineol	0	0	0	0	0	0	0	0	0		0	0	0	0	0		0	0	0	0	0				d-terpineol	0	0	0	0	0	0	0	0	0		0	0	0	0	0		0	0	0	0	0
borneol	0	0	0	0	0	0	0	0	0		0	0	0	0	0		0	0	0	0	0				borneol	0	0	0	0	0	0	0	0	0		0	0	0	0	0		0	0	0	0	0			borneol
trans-isopulegone	0	0	0	0	0	0	0	0	0		0	0	0	0	0		0	0	0	0	0				trans-isopulegone	0	0	0	0	0	0	0	0	0		0	0	0	0	0		0	0	0	0	0
menthol	11.4	2.58757	7.87915e+06	3.27906e+06	17.8581	2.83759	11.3036	9.63196	15.3689		1.91421e+07	1427143	2438013	11088838	5.29964e+06		57426272	2854286	9752052	33266514	21198579				menthol	9.48947	1.45142	6.4747e+06	2.3429e+06	10.6953	10.4793	11.3459	3.71893	11.2079		1925185	6.30123e+06	1.32006e+07	900922	1.00456e+07		5775555	25204905	26401157	2702767	30136781			menthol
terpinen-4-ol	0	0	0	0	0	0	0	0	0		0	0	0	0	0		0	0	0	0	0				terpinen-4-ol	0	0	0	0	0	0	0	0	0		0	0	0	0	0		0	0	0	0	0
cis-isopulegone	0	0	0	0	0	0	0	0	0		0	0	0	0	0		0	0	0	0	0				cis-isopulegone	0	0	0	0	0	0	0	0	0		0	0	0	0	0		0	0	0	0	0
isomenthol	0.151314	0.0427353	100896	44271.8	0.246045	0.0322512	0.132504	0.0951301	0.250641		263735	16220.5	28579.2	109519	86428		791204	32441	114317	328557	345712				isomenthol	0.13037	0.0350508	77285.8	28185.4	0.212973	0.14327	0.0683071	0.0325004	0.1948		38335.7	86148	79473	7873.33	174599		115007	344592	158946	23620	523797
neoisomenthol	0.0159658	0.0070017	11919.1	6726.41	0.0354054	0.00831407	0	0.00621438	0.0298953		37951	4181.5	0	7154.33	10308.8		113853	8363	0	21463	41235				neoisomenthol	0.0257344	0.014209	10220.7	4265.7	0.0775342	0.0294495	0	0	0.0216884		13956.3	17708	0	0	19439.3		41869	70832	0	0	58318
a-terpineol	0.00284426	0.00284426	1430.5	1430.5	0	0.0142213	0	0	0		0	7152.5	0	0	0		0	14305	0	0	0				a-terpineol	0.00231054	0.00231054	2070.93	2070.93	0	0	0	0	0.0115527		0	0	0	0	10354.7		0	0	0	0	31064			a-terpineol
myrtenal	0	0	0	0	0	0	0	0	0		0	0	0	0	0		0	0	0	0	0				myrtenal	0	0	0	0	0	0	0	0	0		0	0	0	0	0		0	0	0	0	0
cis-dihydrocarvone	0	0	0	0	0	0	0	0	0		0	0	0	0	0		0	0	0	0	0				cis-dihydrocarvone	0	0	0	0	0	0	0	0	0		0	0	0	0	0		0	0	0	0	0
trans-dihydrocarvone	0	0	0	0	0	0	0	0	0		0	0	0	0	0		0	0	0	0	0				trans-dihydrocarvone	0	0	0	0	0	0	0	0	0		0	0	0	0	0		0	0	0	0	0
trans-carveol	0	0	0	0	0	0	0	0	0		0	0	0	0	0		0	0	0	0	0				trans-carveol	0	0	0	0	0	0	0	0	0		0	0	0	0	0		0	0	0	0	0
cis-carveol	0	0	0	0	0	0	0	0	0		0	0	0	0	0		0	0	0	0	0				cis-carveol	0	0	0	0	0	0	0	0	0		0	0	0	0	0		0	0	0	0	0
pulegone	2.55011	2.00493	1.51485e+06	1.01548e+06	1.98477	10.4365	0.0265943	0.108736	0.193935		2.12747e+06	5.24897e+06	5736	125183	66874.2		6382403	10497941	22944	375549	267497				pulegone	1.11469	0.427292	968897	538704	0.0993913	1.41475	2.587	0.540676	0.93165		17890.7	850691	3009887	130980	835037		53672	3402765	6019774	392941	2505112
carvone	0.00153311	0.00153311	1643.33	1643.33	0.00766553	0	0	0	0		8216.67	0	0	0	0		24650	0	0	0	0				carvone	0.00105776	0.00105776	948.067	948.067	0	0	0	0	0.00528878		0	0	0	0	4740.33		0	0	0	0	14221
cis-piperitone oxide	0	0	0	0	0	0	0	0	0		0	0	0	0	0		0	0	0	0	0				cis-piperitone oxide	0	0	0	0	0	0	0	0	0		0	0	0	0	0		0	0	0	0	0
piperitone	0.0524146	0.0132203	29439.6	8043.56	0.0523016	0.0257793	0.0578297	0.0275201	0.0986426		56062	12965.5	12473	31682.7	34014.8		168186	25931	49892	95048	136059				piperitone	0.0676402	0.0272528	36558.9	11469.2	0.166277	0.0507838	0.0514673	0	0.0696724		29930.3	30536.2	59880.5	0	62447.3		89791	122145	119761	0	187342
trans-piperitone oxide	0	0	0	0	0	0	0	0	0		0	0	0	0	0		0	0	0	0	0				trans-piperitone oxide	0	0	0	0	0	0	0	0	0		0	0	0	0	0		0	0	0	0	0
isopiperitenone	0	0	0	0	0	0	0	0	0		0	0	0	0	0		0	0	0	0	0				isopiperitenone	0	0	0	0	0	0	0	0	0		0	0	0	0	0		0	0	0	0	0
neo-menthyl acetate	0.0628787	0.0246332	44972.5	26327	0.13806	0.0157264	0.0336323	0.0222311	0.104743		147987	7909.5	7254	25593.7	36118.5		443960	15819	29016	76781	144474				neo-menthyl acetate	0.156175	0.124858	42914.8	20112.8	0.653158	0.073532	0.0158127	0	0.0383711		117570	44214.8	18397.5	0	34392		352710	176859	36795	0	103176
bornyl acetate	0	0	0	0	0	0	0	0	0		0	0	0	0	0		0	0	0	0	0				bornyl acetate	0	0	0	0	0	0	0	0	0		0	0	0	0	0		0	0	0	0	0
menthyl acetate	0.997276	0.387048	744430	436770	2.27832	0.0930533	0.660915	0.516903	1.43719		2442128	46800.5	142550	595087	495584		7326384	93601	570198	1785261	1982334				menthyl acetate	1.71553	1.25828	526645	195343	6.73112	0.683085	0.293599	0.168773	0.701092		1211617	410739	341593	40885.7	628388		3634851	1642956	683186	122657	1885165			menthyl acetate
carvacrol	0	0	0	0	0	0	0	0	0		0	0	0	0	0		0	0	0	0	0				carvacrol	0	0	0	0	0	0	0	0	0		0	0	0	0	0		0	0	0	0	0
piperitenone	0	0	0	0	0	0	0	0	0		0	0	0	0	0		0	0	0	0	0				piperitenone	0	0	0	0	0	0	0	0	0		0	0	0	0	0		0	0	0	0	0
piperitenone oxide	0	0	0	0	0	0	0	0	0		0	0	0	0	0		0	0	0	0	0				piperitenone oxide	0	0	0	0	0	0	0	0	0		0	0	0	0	0		0	0	0	0	0
B-caryophyllene	0.0698187	0.0205371	42064.9	17697.5	0.0931519	0.132334	0.0516528	0.00987792	0.0620766		99849.3	66556.5	11140.8	11372	21405.8		299548	133113	44563	34116	85623				B-caryophyllene	0.0982812	0.0584177	31552	7809.41	0.330299	0.054423	0.0269806	0.0569501	0.0227528		59454.7	32724.5	31391	13796.3	20393.3		178364	130898	62782	41389	61180
(E)-B-farnesene	0.0322832	0.0152411	23911.8	15140.4	0.0750839	0.0588606	0	0	0.0274716		80482.3	29603.5	0	0	9473		241447	59207	0	0	37892				(E)-B-farnesene	0.073038	0.054689	21909	8721.62	0.289755	0.0454054	0.0118701	0	0.0181587		52156.7	27302.2	13810.5	0	16275.7		156470	109209	27621	0	48827
a-humulene	0	0	0	0	0	0	0	0	0		0	0	0	0	0		0	0	0	0	0				a-humulene	0	0	0	0	0	0	0	0	0		0	0	0	0	0		0	0	0	0	0
y-muurolene	0.00797395	0.00491051	6465.53	4530.37	0.0215754	0.0182943	0	0	0		23126.7	9201	0	0	0		69380	18402	0	0	0				y-muurolene	0	0	0	0	0	0	0	0	0		0	0	0	0	0		0	0	0	0	0
germacrene D	0.075948	0.0371076	49089.3	25780.1	0.112473	0.204889	0.0242912	0.00429879	0.0337878		120560	103048	5239.25	4949	11651		361679	206095	20957	14847	46604				germacrene D	0.0481372	0.0248924	17947.5	3634.22	0.146752	0.0360091	0.0186576	0.0232911	0.0159764		26415.7	21652.2	21707.5	5642.33	14319.7		79247	86609	43415	16927	42959
bicyclogermacrene	0.000868055	0.000868055	930.467	930.467	0.00434028	0	0	0	0		4652.33	0	0	0	0		13957	0	0	0	0				bicyclogermacrene	0	0	0	0	0	0	0	0	0		0	0	0	0	0		0	0	0	0	0
a-muurolene	0	0	0	0	0	0	0	0	0		0	0	0	0	0		0	0	0	0	0				a-muurolene	0	0	0	0	0	0	0	0	0		0	0	0	0	0		0	0	0	0	0
y-cadinene	0.0103322	0.0068003	7239	4447.66	0.0179495	0.0337116	0	0	0		19240	16955	0	0	0		57720	33910	0	0	0				y-cadinene	0.00144296	0.00144296	867.65	867.65	0	0.00721479	0	0	0		0	4338.25	0	0	0		0	17353	0	0	0
d-cadinene	0.0266889	0.0130003	17563.2	9330.66	0.0417051	0.0705379	0.0061351	0.00138544	0.0136807		44703.7	35476.5	1323.25	1595	4717.5		134111	70953	5293	4785	18870				d-cadinene	0.0213349	0.0109807	7599.63	1523.09	0.0645899	0.0164111	0.0068326	0.0127401	0.00610064		11626.3	9868	7949.5	3086.33	5468		34879	39472	15899	9259	16404
a-cadinene	0.00144311	0.00144311	1546.87	1546.87	0.00721555	0	0	0	0		7734.33	0	0	0	0		23203	0	0	0	0				a-cadinene	0	0	0	0	0	0	0	0	0		0	0	0	0	0		0	0	0	0	0
																																																	Other
Response ÷ d.w.	65732182	19135978	65732182	19135978	1.0719e+08	5.02943e+07	21568520	115125484	3.44828e+07		1.0719e+08	5.02943e+07	21568520	115125484	3.44828e+07										Response ÷ d.w.	61666405	18818625	61666405	18818625	1.80002e+07	6.013e+07	116346610	2.42253e+07	8.96299e+07		1.80002e+07	6.013e+07	116346610	2.42253e+07	8.96299e+07									Response ÷ d.w.
Fold diff. T-to-C ÷ d.w.	0.94		0.94
Fold diff. S-to-Root ÷ d.w.	435		435																						Fold diff. S-to-Root ÷ d.w.	706		706
Fold diff. S-to-Rhiz. ÷ d.w.	2		2																						Fold diff. S-to-Rhiz. ÷ d.w.	3.31		3.31
[truncated: 33 more columns]

## Sheet: Spearmint
					% Total Response						Peak Area per mg d.w.						d.w (mg)													% Total Response						Peak Area per mg d.w.						d.w (mg)
Root	% Total Response		Peak Area per mg d.w.														17	10	10	14	11				Root	% Total Response		Peak Area per mg d.w.														17	10	10	14	11
NSM - Control	Avg.	Std. Error	Avg.	Std. Error	1	2	3	4	5		1	2	3	4	5		1	2	3	4	5				NSM - Treamtent	Avg.	Std. Error	Avg.	Std. Error	1	2	3	4	5		1	2	3	4	5		1	2	3	4	5			Of Interest
a-thujene	0	0	0	0	0	0	0	0	0		0	0	0	0	0		0	0	0	0	0				a-thujene	0	0	0	0	0	0	0	0	0		0	0	0	0	0		0	0	0	0	0
a-pinene	0	0	0	0	0	0	0	0	0		0	0	0	0	0		0	0	0	0	0				a-pinene	0.35771	0.35771	534.86	534.86	0	1.78855	0	0	0		0	2674.3	0	0	0		0	26743	0	0	0
camphene	0	0	0	0	0	0	0	0	0		0	0	0	0	0		0	0	0	0	0				camphene	0.349863	0.349863	677.16	677.16	0	0	1.74932	0	0		0	0	3385.8	0	0		0	0	33858	0	0
sabinene	0	0	0	0	0	0	0	0	0		0	0	0	0	0		0	0	0	0	0				sabinene	0.633083	0.387683	1085.9	673.971	0	1.5835	1.58192	0	0		0	2367.7	3061.8	0	0		0	23677	30618	0	0
1-octen-3-ol	2.92826	1.58544	1205.37	695.519	0.450786	8.84227	2.19699	3.15123	0		547.706	3925.5	884.2	669.429	0		9311	39255	8842	9372	0				1-octen-3-ol	3.64224	0.577938	3614	1763.21	1.74622	5.09753	4.24955	4.09969	3.01823		519.824	7622	8225	944.929	758.273		8837	76220	82250	13229	8341
B-pinene	0	0	0	0	0	0	0	0	0		0	0	0	0	0		0	0	0	0	0				B-pinene	0.430528	0.430528	643.74	643.74	0	2.15264	0	0	0		0	3218.7	0	0	0		0	32187	0	0	0
3-octanone	0	0	0	0	0	0	0	0	0		0	0	0	0	0		0	0	0	0	0				3-octanone	0	0	0	0	0	0	0	0	0		0	0	0	0	0		0	0	0	0	0
myrcene	0.619619	0.379504	497.441	360.746	1.5265	0	1.57159	0	0		1854.71	0	632.5	0	0		31530	0	6325	0	0				myrcene	2.03033	1.09454	2611	1698.01	2.42203	5.96623	1.76342	0	0		721	8920.9	3413.1	0	0		12257	89209	34131	0	0
3-octanol	0.686377	0.442144	245.351	184.942	0	2.14981	0	1.28208	0		0	954.4	0	272.357	0		0	9544	0	3813	0				3-octanol	1.62352	0.601748	2129.97	1352.15	1.21783	1.87228	3.69584	0	1.33163		362.529	2799.5	7153.3	0	334.545		6163	27995	71533	0	3680
a-phellandrene	0	0	0	0	0	0	0	0	0		0	0	0	0	0		0	0	0	0	0				a-phellandrene	0	0	0	0	0	0	0	0	0		0	0	0	0	0		0	0	0	0	0
a-terpinene	4.23477	0.767333	1942.76	463.849	2.58179	4.21852	7.06681	4.06983	3.2369		3136.88	1872.8	2844.1	864.571	995.455		53327	18728	28441	12104	10950				a-terpinene	3.36021	0.736066	1848.09	438.937	3.33555	1.92893	1.52483	4.97764	5.03412		992.941	2884.2	2951.3	1147.29	1264.73		16880	28842	29513	16062	13912
p-cymene	13.1536	2.14174	7989.52	4151.5	20.0749	9.33535	15.3064	12.8507	8.20073		24391.1	4144.4	6160.2	2729.93	2522		414648	41444	61602	38219	27742				p-cymene	9.51502	2.95396	4183.05	557.596	17.9511	3.17141	2.61359	10.5202	13.3188		5343.76	4742	5058.6	2424.79	3346.09		90844	47420	50586	33947	36807			p-cymene
limonene	0.837597	0.837597	1017.68	1017.68	4.18799	0	0	0	0		5088.41	0	0	0	0		86503	0	0	0	0				limonene	1.59851	1.02468	1662.43	1446.96	3.03835	4.95421	0	0	0		904.471	7407.7	0	0	0		15376	74077	0	0	0			limonene
1,8-cineole	6.95267	0.570242	3269.46	872.658	5.51367	6.14848	6.53657	8.47859	8.08603		6699.12	2729.6	2630.7	1801.14	2486.73		113885	27296	26307	25216	27354				1,8-cineole	6.20745	1.72049	4761.79	1965.42	2.57655	6.42422	4.84614	12.6396	4.55068		767	9605.7	9379.7	2913.29	1143.27		13039	96057	93797	40786	12576			1,8-cineole
y-terpinene	6.92901	1.23163	3289.6	906.014	5.00111	5.64527	11.745	6.62289	5.63072		6076.35	2506.2	4726.9	1406.93	1731.64		103298	25062	47269	19697	19048				y-terpinene	5.12035	1.59586	3465.91	1281.3	3.496	3.70457	3.77908	11.4881	3.13402		1040.71	5539.2	7314.4	2647.86	787.364		17692	55392	73144	37070	8661
trans-sabinene hydrate	0	0	0	0	0	0	0	0	0		0	0	0	0	0		0	0	0	0	0				trans-sabinene hydrate	0.506235	0.506235	756.94	756.94	0	2.53118	0	0	0		0	3784.7	0	0	0		0	37847	0	0	0
terpinolene	0.48913	0.48913	594.294	594.294	2.44565	0	0	0	0		2971.47	0	0	0	0		50515	0	0	0	0				terpinolene	0	0	0	0	0	0	0	0	0		0	0	0	0	0		0	0	0	0	0
linalool	0	0	0	0	0	0	0	0	0		0	0	0	0	0		0	0	0	0	0				linalool	0	0	0	0	0	0	0	0	0		0	0	0	0	0		0	0	0	0	0
camphor	0.446119	0.446119	542.035	542.035	2.23059	0	0	0	0		2710.18	0	0	0	0		46073	0	0	0	0				camphor	0.911428	0.64055	692.115	486.625	3.27251	0	1.28463	0	0		974.176	0	2486.4	0	0		16561	0	24864	0	0
menthone	0	0	0	0	0	0	0	0	0		0	0	0	0	0		0	0	0	0	0				menthone	0	0	0	0	0	0	0	0	0		0	0	0	0	0		0	0	0	0	0
pinocarvone	25.9352	4.60348	10519.1	1446.83	9.70534	24.115	37.3568	30.782	27.7167		11792	10705.8	15034.6	6539.14	8523.82		200464	107058	150346	91548	93762				pinocarvone	24.2045	6.92622	13094.9	3722.58	15.9168	9.62111	13.7484	38.2784	43.4577		4738.18	14385.8	26610.1	8822.71	10917.9		80549	143858	266101	123518	120097			pinocarvone
menthofuran	0	0	0	0	0	0	0	0	0		0	0	0	0	0		0	0	0	0	0				menthofuran	0	0	0	0	0	0	0	0	0		0	0	0	0	0		0	0	0	0	0
isomenthone	2.13238	2.13238	2590.85	2590.85	10.6619	0	0	0	0		12954.2	0	0	0	0		220222	0	0	0	0				isomenthone	0	0	0	0	0	0	0	0	0		0	0	0	0	0		0	0	0	0	0
neomenthol	0	0	0	0	0	0	0	0	0		0	0	0	0	0		0	0	0	0	0				neomenthol	0	0	0	0	0	0	0	0	0		0	0	0	0	0		0	0	0	0	0
d-terpineol	0	0	0	0	0	0	0	0	0		0	0	0	0	0		0	0	0	0	0				d-terpineol	0	0	0	0	0	0	0	0	0		0	0	0	0	0		0	0	0	0	0
borneol	10.555	2.22695	4635.99	1032.38	6.57646	7.76264	9.25461	10.0465	19.1346		7990.41	3446.2	3724.6	2134.21	5884.55		135837	34462	37246	29879	64730				borneol	15.1731	8.37376	21475.1	18185.2	7.19375	5.04557	48.6099	8.06984	6.94616		2141.47	7544.3	94084.5	1860	1745.09		36405	75443	940845	26040	19196			borneol
trans-isopulegone	0	0	0	0	0	0	0	0	0		0	0	0	0	0		0	0	0	0	0				trans-isopulegone	0	0	0	0	0	0	0	0	0		0	0	0	0	0		0	0	0	0	0
menthol	2.31748	1.90672	1301.3	870.324	1.76683	9.82054	0	0	0		2146.71	4359.8	0	0	0		36494	43598	0	0	0				menthol	1.82731	1.11923	1620.75	1303.14	4.64072	4.49582	0	0	0		1381.47	6722.3	0	0	0		23485	67223	0	0	0
terpinen-4-ol	10.1136	2.63484	4047.66	993.379	3.24362	17.7724	7.3764	14.5231	7.65238		3941	7890	2968.7	3085.21	2353.36		66997	78900	29687	43193	25887				terpinen-4-ol	7.15145	0.845609	5234.59	1997.91	5.96842	7.40513	4.6728	8.18977	9.52112		1776.71	11072.4	9044.2	1887.64	2392		30204	110724	90442	26427	26312			terpinen-4-ol
cis-isopulegone	0	0	0	0	0	0	0	0	0		0	0	0	0	0		0	0	0	0	0				cis-isopulegone	0	0	0	0	0	0	0	0	0		0	0	0	0	0		0	0	0	0	0
isomenthol	0	0	0	0	0	0	0	0	0		0	0	0	0	0		0	0	0	0	0				isomenthol	0	0	0	0	0	0	0	0	0		0	0	0	0	0		0	0	0	0	0
neoisomenthol	0	0	0	0	0	0	0	0	0		0	0	0	0	0		0	0	0	0	0				neoisomenthol	0	0	0	0	0	0	0	0	0		0	0	0	0	0		0	0	0	0	0
a-terpineol	0.052762	0.052762	64.1059	64.1059	0.26381	0	0	0	0		320.529	0	0	0	0		5449	0	0	0	0				a-terpineol	1.30842	1.10233	2233.39	2183.2	0	0	5.6651	0.877022	0		0	0	10964.8	202.143	0		0	0	109648	2830	0
myrtenal	0	0	0	0	0	0	0	0	0		0	0	0	0	0		0	0	0	0	0				myrtenal	1.03457	0.746057	629.045	408.694	3.83232	1.34053	0	0	0		1140.82	2004.4	0	0	0		19394	20044	0	0	0
cis-dihydrocarvone	1.28548	0.896419	408.788	199.098	0.575163	0	0	4.78064	1.07158		698.824	0	0	1015.57	329.545		11880	0	0	14218	3625				cis-dihydrocarvone	0	0	0	0	0	0	0	0	0		0	0	0	0	0		0	0	0	0	0			cis-dihydrocarvone
trans-dihydrocarvone	0	0	0	0	0	0	0	0	0		0	0	0	0	0		0	0	0	0	0				trans-dihydrocarvone	0	0	0	0	0	0	0	0	0		0	0	0	0	0		0	0	0	0	0
trans-carveol	0.585158	0.387648	511.403	460.37	1.93052	0	0	0.995266	0		2345.59	0	0	211.429	0		39875	0	0	2960	0				trans-carveol	1.24589	1.24589	370.882	370.882	6.22945	0	0	0	0		1854.41	0	0	0	0		31525	0	0	0	0
cis-carveol	0	0	0	0	0	0	0	0	0		0	0	0	0	0		0	0	0	0	0				cis-carveol	0	0	0	0	0	0	0	0	0		0	0	0	0	0		0	0	0	0	0
pulegone	0	0	0	0	0	0	0	0	0		0	0	0	0	0		0	0	0	0	0				pulegone	0	0	0	0	0	0	0	0	0		0	0	0	0	0		0	0	0	0	0
carvone	7.70314	3.44614	5164.28	3395.6	15.0252	4.18969	0	2.41722	16.8836		18255.6	1860	0	513.5	5192.27		310346	18600	0	7189	57115				carvone	3.64989	1.51431	2154.65	1172.92	8.70562	4.37223	0.215397	0.859667	4.09656		2591.53	6537.5	416.9	198.143	1029.18		44056	65375	4169	2774	11321			carvone
cis-piperitone oxide	0	0	0	0	0	0	0	0	0		0	0	0	0	0		0	0	0	0	0				cis-piperitone oxide	0	0	0	0	0	0	0	0	0		0	0	0	0	0		0	0	0	0	0
piperitone	0	0	0	0	0	0	0	0	0		0	0	0	0	0		0	0	0	0	0				piperitone	0	0	0	0	0	0	0	0	0		0	0	0	0	0		0	0	0	0	0
trans-piperitone oxide	0	0	0	0	0	0	0	0	0		0	0	0	0	0		0	0	0	0	0				trans-piperitone oxide	0	0	0	0	0	0	0	0	0		0	0	0	0	0		0	0	0	0	0
isopiperitenone	0	0	0	0	0	0	0	0	0		0	0	0	0	0		0	0	0	0	0				isopiperitenone	0	0	0	0	0	0	0	0	0		0	0	0	0	0		0	0	0	0	0
neo-menthyl acetate	0	0	0	0	0	0	0	0	0		0	0	0	0	0		0	0	0	0	0				neo-menthyl acetate	0	0	0	0	0	0	0	0	0		0	0	0	0	0		0	0	0	0	0
bornyl acetate	0	0	0	0	0	0	0	0	0		0	0	0	0	0		0	0	0	0	0				bornyl acetate	0	0	0	0	0	0	0	0	0		0	0	0	0	0		0	0	0	0	0
menthyl acetate	0	0	0	0	0	0	0	0	0		0	0	0	0	0		0	0	0	0	0				menthyl acetate	0	0	0	0	0	0	0	0	0		0	0	0	0	0		0	0	0	0	0
carvacrol	0	0	0	0	0	0	0	0	0		0	0	0	0	0		0	0	0	0	0				carvacrol	0	0	0	0	0	0	0	0	0		0	0	0	0	0		0	0	0	0	0
piperitenone	0	0	0	0	0	0	0	0	0		0	0	0	0	0		0	0	0	0	0				piperitenone	0	0	0	0	0	0	0	0	0		0	0	0	0	0		0	0	0	0	0
piperitenone oxide	0	0	0	0	0	0	0	0	0		0	0	0	0	0		0	0	0	0	0				piperitenone oxide	0	0	0	0	0	0	0	0	0		0	0	0	0	0		0	0	0	0	0
B-caryophyllene	0.0350423	0.0350423	42.5765	42.5765	0.175212	0	0	0	0		212.882	0	0	0	0		3619	0	0	0	0				B-caryophyllene	1.7925	1.7925	2680.2	2680.2	0	8.96248	0	0	0		0	13401	0	0	0		0	134010	0	0	0
(E)-B-farnesene	0	0	0	0	0	0	0	0	0		0	0	0	0	0		0	0	0	0	0				(E)-B-farnesene	0	0	0	0	0	0	0	0	0		0	0	0	0	0		0	0	0	0	0
a-humulene	0	0	0	0	0	0	0	0	0		0	0	0	0	0		0	0	0	0	0				a-humulene	0	0	0	0	0	0	0	0	0		0	0	0	0	0		0	0	0	0	0
y-muurolene	0	0	0	0	0	0	0	0	0		0	0	0	0	0		0	0	0	0	0				y-muurolene	0.580886	0.580886	868.56	868.56	0	2.90443	0	0	0		0	4342.8	0	0	0		0	43428	0	0	0
germacrene D	0	0	0	0	0	0	0	0	0		0	0	0	0	0		0	0	0	0	0				germacrene D	0.702727	0.702727	1050.74	1050.74	0	3.51363	0	0	0		0	5253.7	0	0	0		0	52537	0	0	0
bicyclogermacrene	0	0	0	0	0	0	0	0	0		0	0	0	0	0		0	0	0	0	0				bicyclogermacrene	0	0	0	0	0	0	0	0	0		0	0	0	0	0		0	0	0	0	0
a-muurolene	0.273454	0.273454	332.247	332.247	1.36727	0	0	0	0		1661.24	0	0	0	0		28241	0	0	0	0				a-muurolene	2.10965	0.938219	1105.62	589.976	4.18366	2.15732	0	0	4.20728		1245.41	3225.7	0	0	1057		21172	32257	0	0	11627
y-cadinene	0.318547	0.318547	387.035	387.035	1.59274	0	0	0	0		1935.18	0	0	0	0		32898	0	0	0	0				y-cadinene	0.652594	0.652594	975.78	975.78	0	3.26297	0	0	0		0	4878.9	0	0	0		0	48789	0	0	0
d-cadinene	1.21927	0.514083	790.056	472.597	2.12089	0	1.58873	0	2.38673		2576.88	0	639.4	0	734		43807	0	6394	0	8074				d-cadinene	2.06987	1.01912	1727.2	1342.6	4.27317	4.69245	0	0	1.38373		1272.06	7016.3	0	0	347.636		21625	70163	0	0	3824
a-cadinene	0.196407	0.196407	238.635	238.635	0.982037	0	0	0	0		1193.18	0	0	0	0		20284	0	0	0	0				a-cadinene	0.210215	0.210215	314.32	314.32	0	1.05107	0	0	0		0	1571.6	0	0	0		0	15716	0	0	0
																																																	Other
Response ÷ d.w.	51628	17921	51628	17921	121500	44394.7	40245.9	21243.4	30753.4		121500	44394.7	40245.9	21243.4	30753.4										Response ÷ d.w.	84203	36343	84203	36343	29768.5	149523	193550	23048.8	25123.1		29768.5	149523	193550	23048.8	25123.1									Response ÷ d.w.
Fold diff. T-to-C ÷ d.w.	1.63		1.63
					% Total Response						Peak Area per mg d.w.						d.w (mg)													% Total Response						Peak Area per mg d.w.						d.w (mg)
Rhizome	% Total Response		Peak Area per mg d.w.														5	3	4	3	3				Rhizome	% Total Response		Peak Area per mg d.w.				X						X				6	9	3	6	8
NSM - Control	Avg.	Std. Error	Avg.	Std. Error	1	2	3	4	5		1	2	3	4	5		1	2	3	4	5				NSM - Treamtent	Avg.	Std. Error	Avg.	Std. Error	1	2	3	4	5		1	2	3	4	5		1	2	3	4	5			Of Interest
a-thujene	0.881035	0.228301	32506.6	6217.78	0.383286	0.953629	0.369855	1.13739	1.56102		42531.6	13562	30954.5	49069	26416		212658	40686	123818	147207	79248				a-thujene	0.342257	0.134654	9004.92	5110.02	0.638916	0.440534	0.213372	0	0.289578		7846.83	23554.1	28191.3	0	4618.75		47081	211987	84574	0	36950
a-pinene	3.11618	1.02516	96400.2	24544.7	0.729108	4.03186	0.678911	4.39848	5.74254		80906	57339	56820.5	189759	97176.7		404530	172017	227282	569276	291530				a-pinene	1.19235	0.57208	31566.1	19062.6	2.5967	1.59178	1.40259	0	0.580904		31891.3	85107.9	185314	0	9265.38		191348	765971	555943	0	74123
camphene	0	0	0	0	0	0	0	0	0		0	0	0	0	0		0	0	0	0	0				camphene	0	0	0	0	0	0	0.120375	0	0		0	0	15904.3	0	0		0	0	47713	0	0
sabinene	1.97416	0.553671	69104	17382.9	0.666249	2.50621	0.614703	3.11031	2.97334		73930.8	35642	51446.8	134185	50315.7		369654	106926	205787	402554	150947				sabinene	0.932159	0.224416	26504.9	17889.3	1.05468	1.49576	0.591665	0.723826	0.454367		12953	79974.3	78172.7	5845.33	7247.12		77718	719769	234518	35072	57977
1-octen-3-ol	0.166396	0.117554	5947.19	2784.43	0.131911	0.626049	0.07402	0	0		14637.6	8903.33	6195	0	0		73188	26710	24780	0	0				1-octen-3-ol	0.285569	0.19697	4456.71	2220.1	0.862505	0.0738771	0.0567829	0	0.205894		10592.8	3950	7502.33	0	3284		63557	35550	22507	0	26272
B-pinene	3.25108	1.04714	104096	30306.9	0.756719	4.07401	0.749493	5.15633	5.51887		83969.8	57938.3	62727.8	222454	93391.7		419849	173815	250911	667362	280175				B-pinene	1.28894	0.581131	38693.6	26398.3	2.37203	2.16547	1.58802	0	0.618255		29132	115781	209814	0	9861.12		174792	1042032	629443	0	78889
3-octanone	0	0	0	0	0	0	0	0	0		0	0	0	0	0		0	0	0	0	0				3-octanone	0	0	0	0	0	0	0	0	0		0	0	0	0	0		0	0	0	0	0
myrcene	7.16432	2.10575	252876	45106.5	3.74283	10.5258	3.20878	4.59124	13.753		415326	149692	268554	198075	232732		2076631	449075	1074218	594224	698195				myrcene	6.04445	1.89711	187593	140177	3.91001	11.3737	0.251944	6.04838	2.84574		48020.7	608119	33287.7	48844.3	45389.2		288124	5473070	99863	293066	363114
3-octanol	0.244716	0.150014	23212.9	17120.6	0.816366	0	0.195006	0.212207	0		90588.6	0	16320.8	9155	0		452943	0	65283	27465	0				3-octanol	0.445394	0.238325	8636.59	3431.23	1.11661	0.272585	0	0	0.392377		13713.7	14574.3	0	0	6258.38		82282	131169	0	0	50067
a-phellandrene	0	0	0	0	0	0	0	0	0		0	0	0	0	0		0	0	0	0	0				a-phellandrene	0	0	0	0	0	0	0	0	0		0	0	0	0	0		0	0	0	0	0
a-terpinene	0.428691	0.107078	15900.2	2713.42	0.219801	0.584844	0.224336	0.349289	0.765186		24390.4	8317.33	18775.5	15069	12948.7		121952	24952	75102	45207	38846				a-terpinene	0.332435	0.0818596	5887.22	1697.34	0.550056	0.192959	0.0865582	0.365979	0.220746		6755.5	10317	11436.3	2955.5	3520.88		40533	92853	34309	17733	28167
p-cymene	2.62747	0.723201	88424.3	16851.9	0.516722	3.63643	1.65247	2.69634	4.63539		57338.4	51715.3	138301	116325	78441.3		286692	155146	553205	348976	235324				p-cymene	1.42749	0.289116	26991.1	9135.23	2.20868	0.985705	0.500011	1.5224	0.993187		27125.8	52702.9	66063	12294.3	15841.2		162755	474326	198189	73766	126730			p-cymene
limonene	19.0918	4.61634	883176	396834	4.13491	14.256	28.836	20.0124	28.2198		458833	202742	2.41339e+06	863372	477543		2294164	608225	9653559	2590117	1432629				limonene	14.2516	2.34851	360323	216015	9.65889	18.8441	1.66262	17.716	10.7875		118626	1.00754e+06	219671	143068	172060		711753	9067856	659012	858405	1376479			limonene
1,8-cineole	3.24449	1.0723	123286	37416.7	1.12337	5.71242	1.42058	5.98167	1.98443		124656	81239	118893	258060	33581		623280	243717	475573	774181	100743				1,8-cineole	3.06678	1.1295	45926.2	8717.7	2.71346	1.27712	1.08205	6.33886	1.93766		33325.3	68283.9	142963	51190.2	30905.5		199952	614555	428890	307141	247244			1,8-cineole
y-terpinene	1.08828	0.226411	42876.4	8078.76	0.499259	1.26058	0.730492	1.14335	1.8077		55400.6	17927.3	61137.5	49326.3	30590.3		277003	53782	244550	147979	91771				y-terpinene	0.863389	0.199421	16140	5628.02	1.3652	0.595474	0.217201	0.997717	0.495167		16766.7	31838.3	28697.3	8057.17	7897.88		100600	286545	86092	48343	63183
trans-sabinene hydrate	0.381143	0.140674	19561.5	7708.34	0.406138	0.871593	0.326799	0.301185	0		45067.4	12395.3	27351	12993.7	0		225337	37186	109404	38981	0				trans-sabinene hydrate	0.117113	0.117113	6261.72	6261.72	0	0.468453	0.165727	0	0		0	25046.9	21896.3	0	0		0	225422	65689	0	0
terpinolene	0.116697	0.0515005	8425.53	3528.7	0.147491	0	0.171426	0.264569	0		16366.4	0	14347.2	11414	0		81832	0	57389	34242	0				terpinolene	0.0910696	0.0663403	4090.3	3662.09	0	0.28123	0	0	0.083049		0	15036.6	0	0	1324.62		0	135329	0	0	10597
linalool	0.0284072	0.0173979	2769.6	1728.41	0.0718871	0	0.0701487	0	0		7977	0	5871	0	0		39885	0	23484	0	0				linalool	0.0192096	0.0192096	1027.08	1027.08	0	0.0768384	0	0	0		0	4108.33	0	0	0		0	36975	0	0	0
camphor	0.0828721	0.0569035	3055.48	1397.56	0.0278555	0	0.0845554	0	0.301949		3091	0	7076.75	0	5109.67		15455	0	28307	0	15329				camphor	0.0723888	0.0723888	889.042	889.042	0.289555	0	0	0	0		3556.17	0	0	0	0		21337	0	0	0	0
menthone	0	0	0	0	0	0	0	0	0		0	0	0	0	0		0	0	0	0	0				menthone	0	0	0	0	0	0	0	0	0		0	0	0	0	0		0	0	0	0	0
pinocarvone	0.358892	0.121421	11269.8	842.023	0.120814	0.767103	0.142995	0.272496	0.49105		13406.2	10909.3	11967.8	11756	8309.67		67031	32728	47871	35268	24929				pinocarvone	0.297422	0.097524	4194.35	711.124	0.508747	0.0758118	0	0.403334	0.201796		6248.17	4053.44	0	3257.17	3218.62		37489	36481	0	19543	25749			pinocarvone
menthofuran	0	0	0	0	0	0	0	0	0		0	0	0	0	0		0	0	0	0	0				menthofuran	0	0	0	0	0	0	79.025	0	0		0	0	10441033	0	0		0	0	31323099	0	0
isomenthone	0	0	0	0	0	0	0	0	0		0	0	0	0	0		0	0	0	0	0				isomenthone	0	0	0	0	0	0	0	0	0		0	0	0	0	0		0	0	0	0	0
neomenthol	0	0	0	0	0	0	0	0	0		0	0	0	0	0		0	0	0	0	0				neomenthol	0	0	0	0	0	0	0	0	0		0	0	0	0	0		0	0	0	0	0
d-terpineol	0	0	0	0	0	0	0	0	0		0	0	0	0	0		0	0	0	0	0				d-terpineol	0	0	0	0	0	0	0	0	0		0	0	0	0	0		0	0	0	0	0
borneol	0.450603	0.190031	13288.4	1503.14	0.116614	1.17191	0.185546	0.309877	0.469067		12940.2	16666.3	15529	13368.7	7937.67		64701	49999	62116	40106	23813				borneol	0.449296	0.127374	6399.01	1314.56	0.446336	0.090554	0.154641	0.613246	0.647049		5481.67	4841.67	20431.7	4952.33	10320.4		32890	43575	61295	29714	82563			borneol
trans-isopulegone	0	0	0	0	0	0	0	0	0		0	0	0	0	0		0	0	0	0	0				trans-isopulegone	0	0	0	0	0	0	0	0	0		0	0	0	0	0		0	0	0	0	0
menthol	0.0796432	0.0713819	1608.98	1050.62	0	0.363933	0.0342828	0	0		0	5175.67	2869.25	0	0		0	15527	11477	0	0				menthol	0.0560227	0.0560227	688.042	688.042	0.224091	0	1.02709	0	0		2752.17	0	135702	0	0		16513	0	407107	0	0
terpinen-4-ol	0.44637	0.137517	15085.7	2549.7	0.225125	0.737406	0.164929	0.284835	0.819552		24981.2	10487	13803.5	12288.3	13868.7		124906	31461	55214	36865	41606				terpinen-4-ol	0.515673	0.15651	9886.62	4003.15	0.92824	0.384973	0	0.557667	0.191811		11400.2	20583.4	0	4503.5	3059.38		68401	185251	0	27021	24475			terpinen-4-ol
cis-isopulegone	0	0	0	0	0	0	0	0	0		0	0	0	0	0		0	0	0	0	0				cis-isopulegone	0	0	0	0	0	0	0	0	0		0	0	0	0	0		0	0	0	0	0
isomenthol	0	0	0	0	0	0	0	0	0		0	0	0	0	0		0	0	0	0	0				isomenthol	0	0	0	0	0	0	0	0	0		0	0	0	0	0		0	0	0	0	0
neoisomenthol	0	0	0	0	0	0	0	0	0		0	0	0	0	0		0	0	0	0	0				neoisomenthol	0	0	0	0	0	0	0	0	0		0	0	0	0	0		0	0	0	0	0
a-terpineol	0	0	0	0	0	0	0	0	0		0	0	0	0	0		0	0	0	0	0				a-terpineol	0.00879667	0.00879667	470.333	470.333	0	0.0351867	0	0	0		0	1881.33	0	0	0		0	16932	0	0	0
myrtenal	0	0	0	0	0	0	0	0	0		0	0	0	0	0		0	0	0	0	0				myrtenal	0	0	0	0	0	0	0	0	0		0	0	0	0	0		0	0	0	0	0
cis-dihydrocarvone	15.0774	5.37804	534311	99472.3	5.84756	35.1374	7.35309	17.1564	9.89247		648878	499706	615407	740160	167403		3244391	1499118	2461627	2220480	502209				cis-dihydrocarvone	5.45649	3.04987	124791	64340.1	0.745635	4.56461	0	2.21893	14.2968		9157.5	244057	0	17919.2	228032		54945	2196510	0	107515	1824260			cis-dihydrocarvone
trans-dihydrocarvone	0.611629	0.203672	18980.6	2538.59	0.127699	1.29612	0.287178	0.589945	0.757208		14170.2	18432.7	24035	25451.3	12813.7		70851	55298	96140	76354	38441				trans-dihydrocarvone	0.248674	0.12194	5076.71	2328.77	0.0731725	0.157841	0	0.1539	0.609784		898.667	8439.33	0	1242.83	9726		5392	75954	0	7457	77808
trans-carveol	1.32277	0.70719	43276.6	11729	0.494661	0.812106	0.727012	0.442107	4.13796		54890.4	11549.3	60846.2	19073.3	70023.7		274452	34648	243385	57220	210071				trans-carveol	1.77825	0.515946	47454.2	30748.9	2.64163	2.58566	0	1.39077	0.494924		32443.2	138248	0	11231.3	7894		194659	1244233	0	67388	63152
cis-carveol	0.107413	0.0379432	4239.44	1365.26	0.0607467	0.121741	0.0934808	0.0184198	0.242678		6740.8	1731.33	7823.75	794.667	4106.67		33704	5194	31295	2384	12320				cis-carveol	0.328346	0.138728	4615.51	1342.08	0.647927	0.0963956	0	0.473174	0.0958861		7957.5	5154	0	3821.17	1529.38		47745	46386	0	22927	12235
pulegone	0	0	0	0	0	0	0	0	0		0	0	0	0	0		0	0	0	0	0				pulegone	0	0	0	0	0	0	0.0409416	0	0		0	0	5409.33	0	0		0	0	16228	0	0
carvone	34.9385	13.0221	2.86337e+06	1.6094e+06	77.0597	8.53065	50.9273	28.0812	10.0935		8.55099e+06	121318	4262287	1211475	170804		42754928	363955	17049148	3634425	512413				carvone	57.4192	3.78595	1.17977e+06	448062	62.3679	46.4638	0	58.2487	62.5963		765970	2.48429e+06	0	470394	998406		4595823	22358611	0	2822363	7987249			carvone
cis-piperitone oxide	0	0	0	0	0	0	0	0	0		0	0	0	0	0		0	0	0	0	0				cis-piperitone oxide	0	0	0	0	0	0	0	0	0		0	0	0	0	0		0	0	0	0	0
piperitone	0.111628	0.0323948	8038.66	4034.38	0.195368	0.110607	0.149495	0.102669	0		21679.2	1573	12511.8	4429.33	0		108396	4719	50047	13288	0				piperitone	0.0586302	0.0358411	1764.35	1130.01	0	0.0884073	0	0	0.146114		0	4726.89	0	0	2330.5		0	42542	0	0	18644
trans-piperitone oxide	0	0	0	0	0	0	0	0	0		0	0	0	0	0		0	0	0	0	0				trans-piperitone oxide	0	0	0	0	0	0	0	0	0		0	0	0	0	0		0	0	0	0	0
isopiperitenone	0	0	0	0	0	0	0	0	0		0	0	0	0	0		0	0	0	0	0				isopiperitenone	0	0	0	0	0	0	0	0	0		0	0	0	0	0		0	0	0	0	0
neo-menthyl acetate	0	0	0	0	0	0	0	0	0		0	0	0	0	0		0	0	0	0	0				neo-menthyl acetate	0	0	0	0	0	0	0.677146	0	0		0	0	89466.7	0	0		0	0	268400	0	0
bornyl acetate	0	0	0	0	0	0	0	0	0		0	0	0	0	0		0	0	0	0	0				bornyl acetate	0	0	0	0	0	0	0	0	0		0	0	0	0	0		0	0	0	0	0
menthyl acetate	0	0	0	0	0	0	0	0	0		0	0	0	0	0		0	0	0	0	0				menthyl acetate	0	0	0	0	0	0	10.9522	0	0		0	0	1.44703e+06	0	0		0	0	4341098	0	0
carvacrol	0	0	0	0	0	0	0	0	0		0	0	0	0	0		0	0	0	0	0				carvacrol	0	0	0	0	0	0	0	0	0		0	0	0	0	0		0	0	0	0	0
piperitenone	0	0	0	0	0	0	0	0	0		0	0	0	0	0		0	0	0	0	0				piperitenone	0	0	0	0	0	0	0	0	0		0	0	0	0	0		0	0	0	0	0
piperitenone oxide	0	0	0	0	0	0	0	0	0		0	0	0	0	0		0	0	0	0	0				piperitenone oxide	0	0	0	0	0	0	0	0	0		0	0	0	0	0		0	0	0	0	0
B-caryophyllene	0.670449	0.232072	20777.6	3883.33	0.271183	0.938206	0.119615	0.618031	1.40521		30092	13342.7	10011	26663	23779.3		150460	40028	40044	79989	71338				B-caryophyllene	0.638565	0.168033	16945	11010	0.851689	0.928098	0.105624	0.591246	0.18323		10460	49622.8	13955.3	4774.67	2922.5		62760	446605	41866	28648	23380
(E)-B-farnesene	0.611369	0.327697	22273.9	6671.97	0.301495	0	0.164155	0.775225	1.81597		33455.6	0	13738.8	33444.7	30730.3		167278	0	54955	100334	92191				(E)-B-farnesene	0.671772	0.260198	22558.5	17892.3	0.370354	1.42583	0	0.604434	0.286475		4548.5	76234.9	0	4881.17	4569.25		27291	686114	0	29287	36554
a-humulene	0	0	0	0	0	0	0	0	0		0	0	0	0	0		0	0	0	0	0				a-humulene	0	0	0	0	0	0	0	0	0		0	0	0	0	0		0	0	0	0	0
y-muurolene	0.0864205	0.0645405	3328.76	2208.68	0.0992271	0	0	0	0.332875		11010.8	0	0	0	5633		55054	0	0	0	16899				y-muurolene	0.0723912	0.0723912	3870.56	3870.56	0	0.289565	0	0	0		0	15482.2	0	0	0		0	139340	0	0	0
germacrene D	0.742709	0.234907	28950.9	9716.24	0.379415	0.593352	0.166856	1.39944	1.17449		42102	8438.33	13964.8	60374.3	19875		210510	25315	55859	181123	59625				germacrene D	0.837778	0.328125	27831.9	22151.3	0.550544	1.76292	0.0505286	0.792799	0.244844		6761.5	94258.6	6676	6402.33	3905.25		40569	848327	20028	38414	31242
bicyclogermacrene	0	0	0	0	0	0	0	0	0		0	0	0	0	0		0	0	0	0	0				bicyclogermacrene	0	0	0	0	0	0	0	0	0		0	0	0	0	0		0	0	0	0	0
a-muurolene	0	0	0	0	0	0	0	0	0		0	0	0	0	0		0	0	0	0	0				a-muurolene	0.0278899	0.0278899	1491.19	1491.19	0	0.11156	0	0	0		0	5964.78	0	0	0		0	53683	0	0	0
y-cadinene	0.128412	0.0636066	5227.32	2340.98	0.10557	0	0	0.203793	0.332698		11714.6	0	0	8792	5630		58573	0	0	26376	16890				y-cadinene	0.0613356	0.0613356	3279.44	3279.44	0	0.245343	0	0	0		0	13117.8	0	0	0		0	118060	0	0	0
d-cadinene	0.361412	0.118575	12511.4	2967.38	0.187649	0.380012	0.0765202	0.390819	0.77206		20822.6	5404.33	6404.25	16860.7	13065		104113	16213	25617	50582	39195				d-cadinene	0.280975	0.0784951	8217.23	5805.36	0.306423	0.478327	0.0279209	0.238579	0.100573		3763.33	25574.8	3689	1926.67	1604.12		22580	230173	11067	11560	12833
a-cadinene	0.00665034	0.00665034	737.96	737.96	0.0332517	0	0	0	0		3689.8	0	0	0	0		18449	0	0	0	0				a-cadinene	0.0198902	0.0198902	1063.47	1063.47	0	0.0795607	0	0	0		0	4253.89	0	0	0		0	38285	0	0	0
																																																	Other
Response ÷ d.w.	5378898	1897573	5378898	1897573	1.10966e+07	1.42215e+06	8.36936e+06	4.31419e+06	1.69223e+06		1.10966e+07	1.42215e+06	8.36936e+06	4.31419e+06	1.69223e+06										Response ÷ d.w.	2244355	1046557	2244355	1046557	1.22815e+06	5.34672e+06	13212310	807560	1594992		1.22815e+06	5.34672e+06	13212310	807560	1594992									Response ÷ d.w.
Fold diff. T-to-C ÷ d.w.	0.42		0.42
Fold diff. Rhiz.-to-Root ÷ d.w.	104		104																						Fold diff. Rhiz.-to-Root ÷ d.w.	27		27
					% Total Response						Peak Area per mg d.w.						d.w (mg)													% Total Response						Peak Area per mg d.w.						d.w (mg)
Stem	% Total Response		Peak Area per mg d.w.														4	3	3	3	2				Stem	% Total Response		Peak Area per mg d.w.				X						X				3	5	2	1	4
NSM - Control	Avg.	Std. Error	Avg.	Std. Error	1	2	3	4	5		1	2	3	4	5		1	2	3	4	5				NSM - Treamtent	Avg.	Std. Error	Avg.	Std. Error	1	2	3	4	5		1	2	3	4	5		1	2	3	4	5			Of Interest
a-thujene	0.121645	0.0323071	66833.1	29301.8	0.0884099	0.196263	0.163243	0.147346	0.012964		177148	49974.3	21314	70226.3	15503		708592	149923	63942	210679	31006				a-thujene	0.323936	0.0850905	60169.1	12322.2	0.115201	0.338341	0.142669	0.531157	0.311047		79548.7	81432.4	175427	30671	49024.2		238646	407162	350854	30671	196097
a-pinene	0.353737	0.0923582	158158	47799.8	0.0338213	0.505299	0.536204	0.423783	0.269576		67768.2	128664	70010	201979	322371		271073	385992	210030	605936	644742				a-pinene	1.20083	0.580352	175582	19747	0.329093	0.729635	0.285307	2.91105	0.833555		227246	175610	350816	168095	131377		681738	878049	701632	168095	525507
camphene	0	0	0	0	0	0	0	0	0		0	0	0	0	0		0	0	0	0	0				camphene	0.0099766	0.00464192	2519.47	841.185	0.00485477	0.0144581	0	0	0.0205935		3352.33	3479.8	0	0	3245.75		10057	17399	0	0	12983
sabinene	0.303449	0.0532044	181276	51031.9	0.119407	0.349011	0.337952	0.439315	0.271562		239256	88868.3	44125	209381	324746		957026	266605	132375	628144	649493				sabinene	0.767931	0.190677	156363	44205.2	0.395169	0.727522	0.302362	1.29882	0.65021		272873	175101	371786	74999	102480		818619	875506	743573	74999	409919
1-octen-3-ol	0.407795	0.198055	196302	56965.3	0.170515	1.1814	0.2031	0.370157	0.113802		341662	300819	26518	176420	136090		1366650	902458	79554	529260	272180				1-octen-3-ol	0.733486	0.224801	159509	59096.4	0.435126	0.884355	0.325484	1.29905	0.315413		300465	212848	400218	75012	49712.2		901394	1064240	800436	75012	198849
B-pinene	0.411567	0.101891	194938	62433.8	0.05003	0.495966	0.64504	0.518079	0.348722		100246	126287	84220.3	246921	417018		400983	378862	252661	740763	834035				B-pinene	1.22849	0.479435	204287	34833.8	0.424637	0.94023	0.486988	2.62091	0.928173		293221	226296	598804	151341	146290		879664	1131481	1197609	151341	585158
3-octanone	0	0	0	0	0	0	0	0	0		0	0	0	0	0		0	0	0	0	0				3-octanone	0	0	0	0	0	0	0	0	0		0	0	0	0	0		0	0	0	0	0
myrcene	1.73536	0.381951	1.00548e+06	312766	0.494503	1.72659	1.91827	2.89143	1.64602		990841	439641	250460	1.37808e+06	1968381		3963365	1318922	751381	4134236	3936762				myrcene	3.93224	0.928685	804118	221841	1.95282	4.03871	0.137629	6.39614	3.34127		1348470	972044	169230	369337	526619		4045410	4860222	338460	369337	2106475
3-octanol	0.635882	0.138626	461128	184385	0.570627	1.09456	0.341092	0.783972	0.389161		1.14337e+06	278707	44535	373648	465376		4573487	836120	133605	1120943	930753				3-octanol	1.09037	0.271824	269886	126042	0.912088	1.07411	0.0774625	1.83405	0.541236		629818	258518	95248.5	105905	85304.2		1889454	1292591	190497	105905	341217
a-phellandrene	0.014698	0.00957261	20202	18564.9	0.0470518	0.0264384	0	0	0		94278.2	6732	0	0	0		377113	20196	0	0	0				a-phellandrene	0.0139685	0.00816839	2847.76	1799.78	0	0.031115	0.0338388	0	0.0247589		0	7488.8	41608.5	0	3902.25		0	37444	83217	0	15609
a-terpinene	0.103804	0.010583	80090.7	35592.5	0.106707	0.135842	0.0917875	0.112316	0.0723668		213809	34589.3	11984.3	53531	86539.5		855237	103768	35953	160593	173079				a-terpinene	0.210131	0.0766544	35464.3	7075.86	0.0635094	0.212005	0.134406	0.42131	0.143701		43854.7	51025.8	165266	24328	22648.8		131564	255129	330533	24328	90595
p-cymene	0.240443	0.053039	139508	42446.9	0.0668042	0.330179	0.204206	0.369541	0.231485		133856	84073.3	26662.3	176126	276820		535426	252220	79987	528379	553641				p-cymene	0.83303	0.39889	132486	29388	0.315549	0.464039	0.0914356	2.02209	0.530445		217894	111686	112430	116763	83603.5		653681	558428	224860	116763	334414			p-cymene
limonene	8.69849	2.22924	4.33884e+06	1.48518e+06	1.02379	9.73814	10.8802	14.4417	7.40861		2.05139e+06	2.47961e+06	1420580	6.88305e+06	8.85956e+06		8205551	7438843	4261740	20649142	17719113				limonene	14.7454	5.69694	2.70648e+06	796271	7.32461	9.56913	0.46335	31.727	10.3608		5.05781e+06	2.30311e+06	569739	1832035	1632963		15173441	11515569	1139478	1832035	6531852			limonene
1,8-cineole	0.844918	0.157069	483402	129708	0.424555	0.925932	1.31295	0.984063	0.577093		850687	235769	171426	469013	690114		3402749	707308	514279	1407039	1380227				1,8-cineole	1.84911	0.31416	444901	175880	1.3459	1.98217	2.08092	2.68415	1.3842		929375	477071	2558721	154993	218164		2788126	2385356	5117442	154993	872657			1,8-cineole
y-terpinene	0.236056	0.0266196	179343	77500.5	0.234175	0.316028	0.200877	0.267584	0.161616		469219	80470	26227.7	127533	193268		1876876	241410	78683	382599	386535				y-terpinene	0.430754	0.117765	78595.9	16421.3	0.139872	0.473649	0.321991	0.711627	0.397868		96585	113999	395923	41092	62708		289755	569993	791846	41092	250832
trans-sabinene hydrate	0.0636994	0.0526045	110970	107963	0.270856	0.0476405	0	0	0		542718	12130.7	0	0	0		2170873	36392	0	0	0				trans-sabinene hydrate	0.139733	0.0510088	53341	30316.4	0.199293	0.2295	0.112365	0	0.130139		137616	55236.4	138165	0	20511.2		412849	276182	276330	0	82045
terpinolene	0.0604053	0.0179735	49971.8	19506.3	0.0571418	0.0864577	0	0.105815	0.0526122		114496	22014.7	0	50432.3	62916		457983	66044	0	151297	125832				terpinolene	0.124145	0.0200842	28112	9135.45	0.0742008	0.138892	0.0651931	0.169213	0.114274		51237.3	33428.8	80162	9771	18010.8		153712	167144	160324	9771	72043
linalool	0.0186435	0.0088689	25129.1	16916.9	0.0453739	0	0	0.0312618	0.016582		90916.2	0	0	14899.7	19829.5		363665	0	0	44699	39659				linalool	0.0270454	0.0119473	11651.2	7617.24	0.0482938	0.0459611	0	0	0.0139268		33348	11062	0	0	2195		100044	55310	0	0	8780
camphor	0.000612887	0.000612887	1228.05	1228.05	0.00306444	0	0	0	0		6140.25	0	0	0	0		24561	0	0	0	0				camphor	0	0	0	0	0	0	0	0	0		0	0	0	0	0		0	0	0	0	0
menthone	0	0	0	0	0	0	0	0	0		0	0	0	0	0		0	0	0	0	0				menthone	0	0	0	0	0	0	0.229547	0	0		0	0	282253	0	0		0	0	564506	0	0
pinocarvone	0.0121473	0.00151961	10663	5043.17	0.0144819	0.0158152	0.00698242	0.0120854	0.0113719		29017.5	4027	911.667	5760	13599		116070	12081	2735	17280	27198				pinocarvone	0.0176151	0.00688934	5619.32	2470.28	0.016151	0.033283	0	0	0.0210266		11152.7	8010.6	0	0	3314		33458	40053	0	0	13256			pinocarvone
menthofuran	0	0	0	0	0	0	0	0	0		0	0	0	0	0		0	0	0	0	0				menthofuran	0	0	0	0	0	0	74.8932	0	0		0	0	92089247	0	0		0	0	184178494	0	0
isomenthone	0	0	0	0	0	0	0	0	0		0	0	0	0	0		0	0	0	0	0				isomenthone	0	0	0	0	0	0	0.139512	0	0		0	0	171545	0	0		0	0	343090	0	0
neomenthol	0	0	0	0	0	0	0	0	0		0	0	0	0	0		0	0	0	0	0				neomenthol	0	0	0	0	0	0	1.01465	0	0		0	0	1247624	0	0		0	0	2495248	0	0
d-terpineol	0.0196089	0.0124041	32055.7	25897.4	0.067277	0	0	0.0157369	0.0150308		134804	0	0	7500.33	17974.5		539215	0	0	22501	35949				d-terpineol	0.0211729	0.0122635	9587.73	6512.69	0.0399412	0.0447504	0.0239771	0	0		27580.3	10770.6	29482.5	0	0		82741	53853	58965	0	0
borneol	0.0137298	0.00710659	18867.2	15694.2	0.0406484	0	0.0143963	0.00731278	0.00629136		81447.8	0	1879.67	3485.33	7523.5		325791	0	5639	10456	15047				borneol	0.0348203	0.0247538	10052.8	5982.52	0.0342624	0	0	0	0.105019		23659	0	0	0	16552		70977	0	0	0	66208			borneol
trans-isopulegone	0.00531267	0.00531267	2532.07	2532.07	0	0	0	0.0265634	0		0	0	0	12660.3	0		0	0	0	37981	0				trans-isopulegone	0	0	0	0	0	0	0	0	0		0	0	0	0	0		0	0	0	0	0
menthol	0.000873229	0.000873229	1749.7	1749.7	0.00436614	0	0	0	0		8748.5	0	0	0	0		34994	0	0	0	0				menthol	0	0	0	0	0	0	11.9641	0	0		0	0	1.47111e+07	0	0		0	0	29422273	0	0
terpinen-4-ol	0.111465	0.0322074	118227	68692.7	0.191557	0.144417	0	0.130924	0.0904277		383826	36772.7	0	62399.7	108138		1535304	110318	0	187199	216275				terpinen-4-ol	0.173973	0.0350292	41156.2	14860.1	0.106303	0.245919	0	0.221634	0.122037		73404.3	59188.2	0	12798	19234.2		220213	295941	0	12798	76937			terpinen-4-ol
cis-isopulegone	0	0	0	0	0	0	0	0	0		0	0	0	0	0		0	0	0	0	0				cis-isopulegone	0	0	0	0	0	0	0	0	0		0	0	0	0	0		0	0	0	0	0
isomenthol	0	0	0	0	0	0	0	0	0		0	0	0	0	0		0	0	0	0	0				isomenthol	0	0	0	0	0	0	0.106365	0	0		0	0	130787	0	0		0	0	261574	0	0
neoisomenthol	0	0	0	0	0	0	0	0	0		0	0	0	0	0		0	0	0	0	0				neoisomenthol	0	0	0	0	0	0	0.0200178	0	0		0	0	24614	0	0		0	0	49228	0	0
a-terpineol	0.0141537	0.00448457	15970.8	9900.18	0.0272483	0.0143568	0	0.0184561	0.0107071		54597.8	3655.67	0	8796.33	12804		218391	10967	0	26389	25608				a-terpineol	0.0125594	0.00729658	5623.78	3776.21	0.0231279	0.0271097	0	0	0		15970.3	6524.8	0	0	0		47911	32624	0	0	0
myrtenal	0	0	0	0	0	0	0	0	0		0	0	0	0	0		0	0	0	0	0				myrtenal	0	0	0	0	0	0	0	0	0		0	0	0	0	0		0	0	0	0	0
cis-dihydrocarvone	0.34252	0.060793	306825	134167	0.379634	0.282974	0.161122	0.531939	0.35693		760677	72053.3	21037	253527	426833		3042709	216160	63111	760580	853666				cis-dihydrocarvone	0.320224	0.0407466	99441.6	49772.2	0.345324	0.420372	0	0.230951	0.284249		238454	101176	0	13336	44800.5		715362	505879	0	13336	179202			cis-dihydrocarvone
trans-dihydrocarvone	0.0376655	0.00532053	29156.1	11696.2	0.0352059	0.0464767	0.0244066	0.0530106	0.0292274		70542.5	11834.3	3186.67	25265.3	34951.5		282170	35503	9560	75796	69903				trans-dihydrocarvone	0.0229012	0.00766152	8104.21	4257.25	0.028994	0.0304286	0	0	0.0321822		20021	7323.6	0	0	5072.25		60063	36618	0	0	20289
trans-carveol	0.701371	0.470189	1.09706e+06	1.00851e+06	2.56034	0.470015	0.114284	0.295678	0.0665374		5.13019e+06	119680	14921.7	140923	79568.5		20520742	359039	44765	422768	159137				trans-carveol	0.646469	0.373822	334904	291770	1.74997	0.402327	0	0.33995	0.0936234		1.2084e+06	96832.8	0	19630	14756		3625190	484164	0	19630	59024
cis-carveol	0.0717003	0.0252707	66607.6	42837.5	0.11788	0.145321	0.018596	0.0477135	0.0289904		236198	37003	2428	22740.7	34668		944794	111009	7284	68222	69336				cis-carveol	0.0582485	0.0181486	23504.9	15778	0.100727	0.076182	0	0.0271371	0.028948		69554.3	18335.6	0	1567	4562.5		208663	91678	0	1567	18250
pulegone	0	0	0	0	0	0	0	0	0		0	0	0	0	0		0	0	0	0	0				pulegone	0	0	0	0	0	0	0	0	0		0	0	0	0	0		0	0	0	0	0
carvone	83.455	2.59594	7.07699e+07	3.22839e+07	90.9328	81.0449	82.4431	75.7789	87.0753		1.82203e+08	2.06364e+07	1.07643e+07	3.61169e+07	1.04129e+08		728812611	61909226	32292797	108350636	208257129				carvone	68.1409	10.3783	2.2288e+07	1.19043e+07	81.9865	74.9608	0	37.3048	78.3114		56613537	1.80417e+07	0	2154119	1.23427e+07		169840611	90208462	0	2154119	49370717			carvone
cis-piperitone oxide	0	0	0	0	0	0	0	0	0		0	0	0	0	0		0	0	0	0	0				cis-piperitone oxide	0	0	0	0	0	0	0	0	0		0	0	0	0	0		0	0	0	0	0
piperitone	0.202355	0.0373749	211948	124404	0.341118	0.191537	0.139891	0.134119	0.205109		683502	48771	18265	63922.3	245279		2734010	146313	54795	191767	490558				piperitone	0.105537	0.0378697	43226.3	27732.6	0.180015	0.125653	0.0446557	0	0.11648		124304	30242.4	54909	0	18358.5		372913	151212	109818	0	73434
trans-piperitone oxide	0	0	0	0	0	0	0	0	0		0	0	0	0	0		0	0	0	0	0				trans-piperitone oxide	0.00361188	0.00361188	2494.08	2494.08	0.0144475	0	0	0	0		9976.33	0	0	0	0		29929	0	0	0	0
isopiperitenone	0.0416727	0.0161833	53396.9	37008.3	0.0991271	0.0441361	0	0.0288168	0.0362835		198622	11238.3	0	13734.3	43389.5		794489	33715	0	41203	86779				isopiperitenone	0.025623	0.017019	14248	11917.6	0.0718567	0.0306355	0	0	0		49618.7	7373.4	0	0	0		148856	36867	0	0	0
neo-menthyl acetate	0	0	0	0	0	0	0	0	0		0	0	0	0	0		0	0	0	0	0				neo-menthyl acetate	0	0	0	0	0	0	0.267203	0	0		0	0	328556	0	0		0	0	657111	0	0
bornyl acetate	0	0	0	0	0	0	0	0	0		0	0	0	0	0		0	0	0	0	0				bornyl acetate	0	0	0	0	0	0	0	0	0		0	0	0	0	0		0	0	0	0	0
menthyl acetate	0	0	0	0	0	0	0	0	0		0	0	0	0	0		0	0	0	0	0				menthyl acetate	0	0	0	0	0	0	6.19367	0	0		0	0	7.61578e+06	0	0		0	0	15231569	0	0
carvacrol	0.047904	0.039321	86106.4	80599.5	0.20379	0	0	0.0285468	0.00718362		408336	0	0	13605.7	8590.5		1633344	0	0	40817	17181				carvacrol	0.0148636	0.0135827	9820.78	9507.47	0.0555164	0.00393798	0	0	0		38335.3	947.8	0	0	0		115006	4739	0	0	0
piperitenone	0.00321443	0.00321443	6440.8	6440.8	0.0160722	0	0	0	0		32204	0	0	0	0		128816	0	0	0	0				piperitenone	0.00111522	0.00111522	770.083	770.083	0.00446087	0	0	0	0		3080.33	0	0	0	0		9241	0	0	0	0
piperitenone oxide	0	0	0	0	0	0	0	0	0		0	0	0	0	0		0	0	0	0	0				piperitenone oxide	0	0	0	0	0	0	0	0	0		0	0	0	0	0		0	0	0	0	0
B-caryophyllene	0.12126	0.018701	104494	45532	0.131991	0.128334	0.0588898	0.174737	0.112346		264473	32677.7	7689	83281.3	134349		1057891	98033	23067	249844	268698				B-caryophyllene	0.697207	0.460629	87830.7	20512	0.169968	0.341606	0.0133396	2.07458	0.202674		117367	82218.2	16402.5	119794	31943.5		352101	411091	32805	119794	127774
(E)-B-farnesene	0.231983	0.058912	237765	134725	0.376924	0.159636	0.0840111	0.365677	0.173666		755247	40648	10969	174285	207678		3020987	121944	32907	522854	415355				(E)-B-farnesene	0.705037	0.361514	116201	33812.1	0.298627	0.470422	0.0146595	1.78141	0.269692		206209	113222	18025.5	102865	42506.2		618627	566110	36051	102865	170025
a-humulene	0	0	0	0	0	0	0	0	0		0	0	0	0	0		0	0	0	0	0				a-humulene	0	0	0	0	0	0	0	0	0		0	0	0	0	0		0	0	0	0	0
y-muurolene	0.0230243	0.0113258	30371.3	20813.3	0.0557262	0	0	0.0428654	0.0165301		111659	0	0	20430	19767.5		446637	0	0	61290	39535				y-muurolene	0.150853	0.0909081	22613.9	6788.02	0.0549048	0.0972737	0	0.420444	0.0307896		37913	23412	0	24278	4852.75		113739	117060	0	24278	19411
germacrene D	0.186857	0.0574255	212106	134469	0.36759	0.0820068	0.0754791	0.272651	0.136557		736545	20881.3	9855	129948	163301		2946179	62644	29565	389843	326602				germacrene D	0.783947	0.406628	143415	58642.7	0.449531	0.467832	0.013756	1.99261	0.225809		310411	112599	16914.5	115061	35589.8		931234	562993	33829	115061	142359
bicyclogermacrene	0	0	0	0	0	0	0	0	0		0	0	0	0	0		0	0	0	0	0				bicyclogermacrene	0	0	0	0	0	0	0	0	0		0	0	0	0	0		0	0	0	0	0
a-muurolene	0.0077423	0.00489651	10783.5	9051.76	0.023225	0	0	0.0154865	0		46536.2	0	0	7381	0		186145	0	0	22143	0				a-muurolene	0.0125741	0.00775842	5100.63	3121.42	0.0184445	0.031852	0	0	0		12736.3	7666.2	0	0	0		38209	38331	0	0	0
y-cadinene	0.0256601	0.00992513	30588.5	21061.6	0.0567722	0.0200213	0	0.0382424	0.0132647		113755	5098	0	18226.7	15862.5		455021	15294	0	54680	31725				y-cadinene	0.107207	0.0538472	18291.3	5716.87	0.0479357	0.0797211	0	0.266263	0.0349089		33100.7	19187.4	0	15375	5502		99302	95937	0	15375	22008
d-cadinene	0.065577	0.0193122	72888.5	48793	0.132633	0.0542842	0.0239623	0.0809014	0.0361046		265758	13822.3	3128.67	38558.3	43175.5		1063030	41467	9386	115675	86351				d-cadinene	0.249998	0.127606	41773.2	12518.2	0.105886	0.188046	0	0.626492	0.0795681		73117	45259.2	0	36176	12540.8		219351	226296	0	36176	50163
a-cadinene	0.00601318	0.00372413	7994.85	6529.3	0.016793	0	0	0.0132729	0		33648.2	0	0	6326	0		134593	0	0	18978	0				a-cadinene	0.0330145	0.0189392	5862.48	2409.22	0.0169123	0.0280021	0	0.0871437	0		11678.3	6739.6	0	5032	0		35035	33698	0	5032	0
																																																	Other
Response ÷ d.w.	81227245	35035826	81227245	35035826	2.00371e+08	2.54629e+07	1.30566e+07	4.76609e+07	1.19585e+08		2.00371e+08	2.54629e+07	1.30566e+07	4.76609e+07	1.19585e+08										Response ÷ d.w.	28663963	13972467	28663963	13972467	6.90523e+07	2.40682e+07	122960826	5774373	1.5761e+07		6.90523e+07	2.40682e+07	122960826	5774373	1.5761e+07									Response ÷ d.w.
Fold diff. T-to-C ÷ d.w.	0.35		0.35
Fold diff. S-to-Root ÷ d.w.	1573		1573																						Fold diff. S-to-Root ÷ d.w.	340		340
Fold diff. S-to-Rhiz. ÷ d.w.	15		15																						Fold diff. S-to-Rhiz. ÷ d.w.	12.77		12.77
[truncated: 31 more columns]

## Sheet: M.longifoliaCMEN585
					% Total Response						Peak Area per mg d.w.						d.w (mg)													% Total Response						Peak Area per mg d.w.						d.w (mg)
Root	% Total Response		Peak Area per mg d.w.							X						X	3	3	3	4	4	6			Root	% Total Response		Peak Area per mg d.w.					X						X			6	5	4	7	5	4
CM-585 - Control	Avg.	Std. Error	Avg.	Std. Error	1	2	3	4	5	6	1	2	3	4	5	6	1	2	3	4	5	6			CM-585 - Treamtent	Avg.	Std. Error	Avg.	Std. Error	1	2	3	4	5	6	1	2	3	4	5	6	1	2	3	4	5	6		Of Interest
a-thujene	0	0	0	0	0	0	0	0	0	0.0694479	0	0	0	0	0	5430	0	0	0	0	0	32580			a-thujene	0	0	0	0	0	0	0	0.304571	0	0	0	0	0	10212.3	0	0	0	0	0	71486	0	0
a-pinene	0	0	0	0	0	0	0	0	0	0.303704	0	0	0	0	0	23746	0	0	0	0	0	142476			a-pinene	0	0	0	0	0	0	0	1.21933	0	0	0	0	0	40884.3	0	0	0	0	0	286190	0	0
camphene	0	0	0	0	0	0	0	0	0	0.141522	0	0	0	0	0	11065.3	0	0	0	0	0	66392			camphene	0.0969108	0.0969108	234.2	234.2	0	0	0.484554	0.602239	0	0	0	0	1171	20193.1	0	0	0	0	4684	141352	0	0
sabinene	0	0	0	0	0	0	0	0	0	0.30439	0	0	0	0	0	23799.7	0	0	0	0	0	142798			sabinene	0	0	0	0	0	0	0	0.561964	0	0	0	0	0	18842.7	0	0	0	0	0	131899	0	0
1-octen-3-ol	1.14058	0.4877	2766.43	1188.38	2.40378	0	0	1.79344	1.50565	0.0313027	4753.67	0	0	3376.5	5702	2447.5	14261	0	0	13506	22808	14685			1-octen-3-ol	2.82129	0.602245	4165.73	1197.82	3.75605	2.68972	0.864211	0.0759999	4.36441	2.43205	7793.5	6149.2	2088.5	2548.29	1677.2	3120.25	46761	30746	8354	17838	8386	12481
B-pinene	0	0	0	0	0	0	0	0	0	0.518412	0	0	0	0	0	40533.7	0	0	0	0	0	243202			B-pinene	0	0	0	0	0	0	0	1.62051	0	0	0	0	0	54336	0	0	0	0	0	380352	0	0
3-octanone	0	0	0	0	0	0	0	0	0	0	0	0	0	0	0	0	0	0	0	0	0	0			3-octanone	0	0	0	0	0	0	0	0	0	0	0	0	0	0	0	0	0	0	0	0	0	0
myrcene	0	0	0	0	0	0	0	0	0	0.14512	0	0	0	0	0	11346.7	0	0	0	0	0	68080			myrcene	0	0	0	0	0	0	0	0.347709	0	0	0	0	0	11658.7	0	0	0	0	0	81611	0	0
3-octanol	0.168162	0.10736	440.15	272.564	0	0	0	0.516415	0.324393	0.093501	0	0	0	972.25	1228.5	7310.67	0	0	0	3889	4914	43864			3-octanol	0.256122	0.256122	531.433	531.433	1.28061	0	0	0.194192	0	0	2657.17	0	0	6511.29	0	0	15943	0	0	45579	0	0
a-phellandrene	0	0	0	0	0	0	0	0	0	0	0	0	0	0	0	0	0	0	0	0	0	0			a-phellandrene	0	0	0	0	0	0	0	0	0	0	0	0	0	0	0	0	0	0	0	0	0	0
a-terpinene	0.532427	0.291168	1213.5	593.065	1.59134	0	0	0.595822	0.474972	0.0351631	3147	0	0	1121.75	1798.75	2749.33	9441	0	0	4487	7195	16496			a-terpinene	0.474121	0.19522	1065.71	435.456	0.868226	0.794686	0.707693	0.125989	0	0	1801.5	1816.8	1710.25	4224.43	0	0	10809	9084	6841	29571	0	0
p-cymene	0.934305	0.560981	2171.88	1161.57	3.05256	0	0	0.687048	0.931922	0.136201	6036.67	0	0	1293.5	3529.25	10649.3	18110	0	0	5174	14117	63896			p-cymene	2.70363	1.43208	5292.98	3139.09	0.473833	0.785588	7.01972	0.400651	0	5.23901	983.167	1796	16964.2	13433.9	0	6721.5	5899	8980	67857	94037	0	26886
limonene	0	0	0	0	0	0	0	0	0	0.0786266	0	0	0	0	0	6147.67	0	0	0	0	0	36886			limonene	0.669096	0.301679	1245.43	524.267	0	0.75252	1.0409	0.754776	0	1.55206	0	1720.4	2515.5	25307.7	0	1991.25	0	8602	10062	177154	0	7965
1,8-cineole	0.791408	0.347065	1969.78	900.179	1.77271	0	0	1.01291	1.17142	1.96634	3505.67	0	0	1907	4436.25	153745	10517	0	0	7628	17745	922468			1,8-cineole	2.51168	0.733113	4553.79	2036.92	2.16121	0.710528	5.04985	1.88698	1.66072	2.9761	4484.33	1624.4	12203.8	63270.6	638.2	3818.25	26906	8122	48815	442894	3191	15273		1,8-cineole
y-terpinene	0	0	0	0	0	0	0	0	0	0.130382	0	0	0	0	0	10194.3	0	0	0	0	0	61166			y-terpinene	0.767326	0.581555	1832.58	1404.96	0	0.834753	3.00188	0.300932	0	0	0	1908.4	7254.5	10090.3	0	0	0	9542	29018	70632	0	0
trans-sabinene hydrate	0	0	0	0	0	0	0	0	0	0	0	0	0	0	0	0	0	0	0	0	0	0			trans-sabinene hydrate	0	0	0	0	0	0	0	0	0	0	0	0	0	0	0	0	0	0	0	0	0	0
terpinolene	0	0	0	0	0	0	0	0	0	0	0	0	0	0	0	0	0	0	0	0	0	0			terpinolene	0	0	0	0	0	0	0	0.148813	0	0	0	0	0	4989.71	0	0	0	0	0	34928	0	0
linalool	0	0	0	0	0	0	0	0	0	0.183129	0	0	0	0	0	14318.5	0	0	0	0	0	85911			linalool	0	0	0	0	0	0	0	0.243078	0	0	0	0	0	8150.43	0	0	0	0	0	57053	0	0
camphor	0.368363	0.368363	728.467	728.467	1.84182	0	0	0	0	1.76358	3642.33	0	0	0	0	137891	10927	0	0	0	0	827347			camphor	1.30606	1.21134	3146.17	2929.32	0	0.388245	6.14206	0.11841	0	0	0	887.6	14843.2	3970.29	0	0	0	4438	59373	27792	0	0
menthone	0.850186	0.340461	1711.7	714.098	0.142599	1.53889	0	1.63317	0.936279	4.81496	282	1656	0	3074.75	3545.75	376472	846	4968	0	12299	14183	2258835			menthone	0	0	0	0	0	0	0	9.43623	0	0	0	0	0	316398	0	0	0	0	0	2214784	0	0		menthone
pinocarvone	0.347058	0.347058	686.333	686.333	1.73529	0	0	0	0	0	3431.67	0	0	0	0	0	10295	0	0	0	0	0			pinocarvone	0.154904	0.154904	374.35	374.35	0	0	0.774521	0	0	0	0	0	1871.75	0	0	0	0	0	7487	0	0	0
menthofuran	37.1173	4.93893	63415.8	20418.7	27.8597	42.9491	52.0258	25.0531	37.6989	0.594355	55094.7	46217.7	25831	47167.2	142768	46471.5	165284	138653	77493	188669	571073	278829			menthofuran	25.6746	5.22032	37383.5	9874.2	30.0052	25.5157	7.37207	0.756058	39.5014	25.9785	62258.5	58333.6	17815.8	25350.7	15180	33329.8	373551	291668	71263	177455	75900	133319		menthofuran
isomenthone	2.59627	0.776061	5376.22	1937.95	2.08538	4.72941	0	2.98548	3.18109	42.7906	4124	5089.33	0	5620.75	12047	3.34571e+06	12372	15268	0	22483	48188	20074280			isomenthone	2.59736	0.972426	4093.52	2238.77	0.669182	1.22903	5.37644	75.0975	4.50909	1.20307	1388.5	2809.8	12993	2.51803e+06	1732.8	1543.5	8331	14049	51972	17626197	8664	6174		isomenthone
neomenthol	0	0	0	0	0	0	0	0	0	0	0	0	0	0	0	0	0	0	0	0	0	0			neomenthol	0	0	0	0	0	0	0	0	0	0	0	0	0	0	0	0	0	0	0	0	0	0
d-terpineol	7.35518	1.10394	14622.7	4745.61	10.3382	8.41524	3.66161	6.61128	7.74953	0.240821	20444.7	9055.67	1818	12447	29348	18829.3	61334	27167	5454	49788	117392	112976			d-terpineol	5.63106	1.98476	10562.1	4886.78	10.1484	10.2918	0.524692	0.0407778	2.52466	4.66573	21057.2	23529	1268	1367.29	970.2	5986	126343	117645	5072	9571	4851	23944		d-terpineol
borneol	21.5402	4.77092	33253.3	8713.71	13.9039	16.9934	32.3167	33.626	10.8609	4.13648	27496	18286.7	16045.3	63307.5	41131	323424	82488	54860	48136	253230	164524	1940543			borneol	21.109	5.11103	39322.5	15875.1	14.2389	16.0123	41.111	1.88277	14.183	19.9998	29544.5	36607.2	99351	63129.4	5450.4	25659.2	177267	183036	397404	441906	27252	102637		borneol
trans-isopulegone	0	0	0	0	0	0	0	0	0	0.458572	0	0	0	0	0	35854.8	0	0	0	0	0	215129			trans-isopulegone	0	0	0	0	0	0	0	0	0	0	0	0	0	0	0	0	0	0	0	0	0	0
menthol	0	0	0	0	0	0	0	0	0	0	0	0	0	0	0	0	0	0	0	0	0	0			menthol	0	0	0	0	0	0	0	0	0	0	0	0	0	0	0	0	0	0	0	0	0	0
terpinen-4-ol	4.84535	0.642385	9792.9	3492.3	6.75895	3.06197	3.90263	4.94173	5.56149	0.32642	13366.3	3295	1937.67	9303.75	21061.8	25522.2	40099	9885	5813	37215	84247	153133			terpinen-4-ol	5.94796	1.53282	9332.75	3474.85	10.4103	5.46867	1.96687	0.149328	8.29218	3.60179	21600.5	12502.4	4753.25	5007	3186.6	4621	129603	62512	19013	35049	15933	18484
cis-isopulegone	0	0	0	0	0	0	0	0	0	0	0	0	0	0	0	0	0	0	0	0	0	0			cis-isopulegone	0	0	0	0	0	0	0	0	0	0	0	0	0	0	0	0	0	0	0	0	0	0
isomenthol	0	0	0	0	0	0	0	0	0	0	0	0	0	0	0	0	0	0	0	0	0	0			isomenthol	0	0	0	0	0	0	0	0	0	0	0	0	0	0	0	0	0	0	0	0	0	0
neoisomenthol	0	0	0	0	0	0	0	0	0	0	0	0	0	0	0	0	0	0	0	0	0	0			neoisomenthol	0	0	0	0	0	0	0	0	0	0	0	0	0	0	0	0	0	0	0	0	0	0
a-terpineol	13.1433	1.71428	26983.2	10288.8	15.0094	15.1494	7.57497	10.9236	17.0592	0.491055	29682.3	16302.3	3761	20565.8	64604.5	38394.7	89047	48907	11283	82263	258418	230368			a-terpineol	11.5758	3.81273	21277.7	9450.45	20.4409	19.7836	1.09004	0.357819	5.71964	10.8449	42413.3	45229	2634.25	11997.7	2198	13913.8	254480	226145	10537	83984	10990	55655		a-terpineol
myrtenal	0	0	0	0	0	0	0	0	0	0	0	0	0	0	0	0	0	0	0	0	0	0			myrtenal	0	0	0	0	0	0	0	0	0	0	0	0	0	0	0	0	0	0	0	0	0	0
cis-dihydrocarvone	0	0	0	0	0	0	0	0	0	0	0	0	0	0	0	0	0	0	0	0	0	0			cis-dihydrocarvone	0	0	0	0	0	0	0	0	0	0	0	0	0	0	0	0	0	0	0	0	0	0
trans-dihydrocarvone	0	0	0	0	0	0	0	0	0	0	0	0	0	0	0	0	0	0	0	0	0	0			trans-dihydrocarvone	0	0	0	0	0	0	0	0	0	0	0	0	0	0	0	0	0	0	0	0	0	0
trans-carveol	0	0	0	0	0	0	0	0	0	0	0	0	0	0	0	0	0	0	0	0	0	0			trans-carveol	0	0	0	0	0	0	0	0	0	0	0	0	0	0	0	0	0	0	0	0	0	0
cis-carveol	0	0	0	0	0	0	0	0	0	0	0	0	0	0	0	0	0	0	0	0	0	0			cis-carveol	0	0	0	0	0	0	0	0	0	0	0	0	0	0	0	0	0	0	0	0	0	0
pulegone	6.68773	1.80278	15485.9	6918.95	5.39499	7.16257	0.518291	9.62	10.7428	39.6051	10669	7707.67	257.333	18111.5	40683.8	3.09664e+06	32007	23123	772	72446	162735	18579859			pulegone	6.24083	2.05041	9154.96	4036.5	1.99911	3.06668	10.4193	0.903844	11.941	3.77814	4148	7011	25179.8	30306	4588.8	4847.25	24888	35055	100719	212142	22944	19389		pulegone
carvone	0	0	0	0	0	0	0	0	0	0.0360072	0	0	0	0	0	2815.33	0	0	0	0	0	16892			carvone	3.65827	2.11658	6486.06	3890.87	0.639783	8.42924	0	0.343257	0	9.22233	1327.5	19270.8	0	11509.4	0	11832	7965	96354	0	80566	0	47328
cis-piperitone oxide	0	0	0	0	0	0	0	0	0	0	0	0	0	0	0	0	0	0	0	0	0	0			cis-piperitone oxide	0	0	0	0	0	0	0	0	0	0	0	0	0	0	0	0	0	0	0	0	0	0
piperitone	0	0	0	0	0	0	0	0	0	0.255416	0	0	0	0	0	19970.5	0	0	0	0	0	119823			piperitone	0.144249	0.144249	348.6	348.6	0	0	0.721245	0.822127	0	0	0	0	1743	27566	0	0	0	0	6972	192962	0	0
trans-piperitone oxide	0	0	0	0	0	0	0	0	0	0	0	0	0	0	0	0	0	0	0	0	0	0			trans-piperitone oxide	0	0	0	0	0	0	0	0	0	0	0	0	0	0	0	0	0	0	0	0	0	0
isopiperitenone	0	0	0	0	0	0	0	0	0	0	0	0	0	0	0	0	0	0	0	0	0	0			isopiperitenone	0	0	0	0	0	0	0	0	0	0	0	0	0	0	0	0	0	0	0	0	0	0
neo-menthyl acetate	0	0	0	0	0	0	0	0	0	0	0	0	0	0	0	0	0	0	0	0	0	0			neo-menthyl acetate	0	0	0	0	0	0	0	0	0	0	0	0	0	0	0	0	0	0	0	0	0	0
bornyl acetate	0	0	0	0	0	0	0	0	0	0	0	0	0	0	0	0	0	0	0	0	0	0			bornyl acetate	0	0	0	0	0	0	0	0	0	0	0	0	0	0	0	0	0	0	0	0	0	0
menthyl acetate	0	0	0	0	0	0	0	0	0	0	0	0	0	0	0	0	0	0	0	0	0	0			menthyl acetate	0	0	0	0	0	0	0	0	0	0	0	0	0	0	0	0	0	0	0	0	0	0
carvacrol	0	0	0	0	0	0	0	0	0	0	0	0	0	0	0	0	0	0	0	0	0	0			carvacrol	0	0	0	0	0	0	0	0	0	0	0	0	0	0	0	0	0	0	0	0	0	0
piperitenone	0	0	0	0	0	0	0	0	0	0	0	0	0	0	0	0	0	0	0	0	0	0			piperitenone	0	0	0	0	0	0	0	0	0	0	0	0	0	0	0	0	0	0	0	0	0	0
piperitenone oxide	0	0	0	0	0	0	0	0	0	0	0	0	0	0	0	0	0	0	0	0	0	0			piperitenone oxide	0	0	0	0	0	0	0	0	0	0	0	0	0	0	0	0	0	0	0	0	0	0
B-caryophyllene	0	0	0	0	0	0	0	0	0	0	0	0	0	0	0	0	0	0	0	0	0	0			B-caryophyllene	0	0	0	0	0	0	0	0	0	0	0	0	0	0	0	0	0	0	0	0	0	0
(E)-B-farnesene	0	0	0	0	0	0	0	0	0	0	0	0	0	0	0	0	0	0	0	0	0	0			(E)-B-farnesene	0	0	0	0	0	0	0	0	0	0	0	0	0	0	0	0	0	0	0	0	0	0
a-humulene	0	0	0	0	0	0	0	0	0	0	0	0	0	0	0	0	0	0	0	0	0	0			a-humulene	0	0	0	0	0	0	0	0	0	0	0	0	0	0	0	0	0	0	0	0	0	0
y-muurolene	0	0	0	0	0	0	0	0	0	0	0	0	0	0	0	0	0	0	0	0	0	0			y-muurolene	0.0883105	0.0883105	113.3	113.3	0	0	0	0.172493	0	0.441553	0	0	0	5783.71	0	566.5	0	0	0	40486	0	2266
germacrene D	0	0	0	0	0	0	0	0	0	0.0836999	0	0	0	0	0	6544.33	0	0	0	0	0	39266			germacrene D	0	0	0	0	0	0	0	0.232265	0	0	0	0	0	7787.86	0	0	0	0	0	54515	0	0
bicyclogermacrene	0	0	0	0	0	0	0	0	0	0	0	0	0	0	0	0	0	0	0	0	0	0			bicyclogermacrene	0	0	0	0	0	0	0	0	0	0	0	0	0	0	0	0	0	0	0	0	0	0
a-muurolene	0.347334	0.232627	893.317	547.53	1.16624	0	0	0	0.570428	0.0236566	2306.33	0	0	0	2160.25	1849.67	6919	0	0	0	8641	11098			a-muurolene	1.44124	0.455317	1772.76	194.95	0.913047	0.646492	0.971798	0.183779	3.17677	1.49808	1894.5	1478	2348.5	6162.14	1220.8	1922	11367	7390	9394	43135	6104	7688
y-cadinene	0.558931	0.452401	1272.47	901.277	2.33282	0	0	0	0.461835	0.0905829	4613.33	0	0	0	1749	7082.5	13840	0	0	0	6996	42495			y-cadinene	1.53852	0.546622	2860.77	844.343	1.00911	1.42377	1.9467	0.264611	0	3.31301	2093.83	3255	4704.5	8872.43	0	4250.5	12563	16275	18818	62107	0	17002
d-cadinene	0.675879	0.506013	1614.95	1050.95	2.61027	0	0	0	0.769131	0.120044	5162	0	0	0	2912.75	9386	15486	0	0	0	11651	56316			d-cadinene	2.38631	0.600275	3253.48	766.177	0.986142	1.17663	2.38791	0.34018	4.12709	3.25377	2046.17	2690	5770.75	11406.3	1586	4174.5	12277	13450	23083	79844	7930	16698
a-cadinene	0	0	0	0	0	0	0	0	0	0.0314669	0	0	0	0	0	2460.33	0	0	0	0	0	14762			a-cadinene	0.205325	0.205325	496.2	496.2	0	0	1.02663	0.1108	0	0	0	0	2481	3715.14	0	0	0	0	9924	26006	0	0
																																																	Other
Response ÷ d.w.	184399	55679	184399	55679	197758	107610	49650.3	188269	378707	7.81881e+06	197758	107610	49650.3	188269	378707	7.81881e+06									Response ÷ d.w.	168901	38093	168901	38093	207492	228619	241666	3353011	38429	128297	207492	228619	241666	3353011	38429	128297								Response ÷ d.w.
Fold diff. T-to-C ÷ d.w.	0.92		0.92
					% Total Response						Peak Area per mg d.w.						d.w (mg)													% Total Response						Peak Area per mg d.w.						d.w (mg)
Rhizome	% Total Response		Peak Area per mg d.w.							X						X	2	2	2	3	4	2			Rhizome	% Total Response		Peak Area per mg d.w.														3	3	3	2	3	3
CM-585 - Control	Avg.	Std. Error	Avg.	Std. Error	1	2	3	4	5	6	1	2	3	4	5	6	1	2	3	4	5	6			CM-585 - Treamtent	Avg.	Std. Error	Avg.	Std. Error	1	2	3	4	5	6	1	2	3	4	5	6	1	2	3	4	5	6		Of Interest
a-thujene	0.0630948	0.0264341	62396.6	10046.4	0.0256708	0.163386	0.0160508	0.0457482	0.0646182	0.337916	58771	81641.5	26079.5	79885	65606	26522	117542	163283	52159	239655	262424	53044			a-thujene	0.232786	0.109308	97539.3	24119.9	0.116014	0.196099	0.106674	0.774301	0.104584	0.0990418	48397.3	93034.7	66612.3	212738	94909.7	69543.7	145192	279104	199837	425476	284729	208631
a-pinene	0.261141	0.105958	258001	38712.5	0.0777265	0.662099	0.0985488	0.200595	0.266736	1.45268	177948	330840	160124	350277	270814	114016	355896	661681	320247	1050832	1083255	228033			a-pinene	1.12659	0.62488	441263	148919	0.514716	0.927043	0.32994	4.21861	0.427774	0.341445	214723	439814	206029	1159057	388203	239751	644170	1319441	618088	2318114	1164610	719252
camphene	0.091817	0.0340405	94721.4	13326	0.0324924	0.220163	0.0371258	0.0779754	0.0913284	0.534662	74388.5	110012	60322.5	136160	92724.5	41964	148777	220024	120645	408479	370898	83928			camphene	0.471155	0.271315	183186	65703.2	0.209679	0.353968	0.120475	1.81689	0.196975	0.128949	87471.3	167932	75230	499187	178754	90543.3	262414	503796	225690	998374	536262	271630
sabinene	0.230903	0.0684034	253963	36828.1	0.104393	0.449933	0.0856812	0.197572	0.316934	0.684037	239000	224824	139216	344997	321779	53688	477999	449649	278432	1034992	1287117	107376			sabinene	0.960989	0.474634	389839	107635	0.518467	0.862025	0.385163	3.30057	0.365878	0.333829	216288	408968	240514	906826	332033	234403	648864	1226903	721541	1813653	996099	703209
1-octen-3-ol	0	0	0	0	0	0	0	0	0	0	0	0	0	0	0	0	0	0	0	0	0	0			1-octen-3-ol	0	0	0	0	0	0	0	0	0	0	0	0	0	0	0	0	0	0	0	0	0	0
B-pinene	0.610815	0.194134	646416	89748.9	0.196896	1.23423	0.282574	0.471452	0.868923	2.05763	450776	616725	459130	823245	882206	161497	901553	1233450	918261	2469734	3528823	322994			B-pinene	2.28271	1.03146	957412	228336	1.08271	2.33219	1.02188	7.32315	0.859983	1.07636	451674	1.10645e+06	638109	2012024	780432	755782	1355023	3319361	1914326	4024048	2341297	2267346
3-octanone	0	0	0	0	0	0	0	0	0	0	0	0	0	0	0	0	0	0	0	0	0	0			3-octanone	0	0	0	0	0	0	0	0	0	0	0	0	0	0	0	0	0	0	0	0	0	0
myrcene	0.145811	0.0335404	170294	20334.2	0.0712632	0.252106	0.08304	0.136607	0.186038	0.114541	163151	125974	134924	238542	188882	8990	326302	251947	269849	715625	755526	17980			myrcene	0.413173	0.153398	183978	30064.9	0.281578	0.373355	0.221686	1.16994	0.22272	0.209753	117466	177130	138431	321440	202118	147281	352397	531389	415293	642881	606353	441843
3-octanol	0.208491	0.0891758	221581	79551.4	0.0816036	0.302772	0.0302222	0.113874	0.513982	0.261088	186824	151290	49105.5	198846	521840	20492	373649	302581	98211	596538	2087358	40984			3-octanol	0.374701	0.0924185	214954	49712.1	0.505348	0.737442	0.257404	0.0790578	0.374393	0.294563	210815	349862	160735	21721	339761	206832	632446	1049586	482204	43442	1019282	620496
a-phellandrene	0.00669341	0.000586908	9353.38	2132.95	0.00686377	0.00847035	0.00509628	0.00725676	0.00577989	0	15714	4232.5	8280.5	12671.7	5868.25	0	31428	8465	16561	38015	23473	0			a-phellandrene	0.0160991	0.00479926	7355	860.962	0.011944	0.0170992	0.0119711	0.0389265	0.00570213	0.0109518	4982.67	8112.33	7475.33	10695	5174.67	7690	14948	24337	22426	21390	15524	23070
a-terpinene	0.025801	0.00530177	31769.6	5171.36	0.0219978	0.0448763	0.0138899	0.0198591	0.0283821	0.19358	50362	22424	22568.5	34677.7	28816	15193.5	100724	44848	45137	104033	115264	30387			a-terpinene	0.0694772	0.0187774	33552.4	3746.58	0.0474868	0.0624965	0.0485817	0.1626	0.0469853	0.0487132	19810	29650	30336.7	44674	42639	34204.7	59430	88950	91010	89348	127917	102614
p-cymene	0.0595922	0.0100268	76413.2	15044.5	0.0582924	0.0922812	0.0362577	0.0420831	0.0690465	1.13115	133456	46111.5	58912	73485	70102	88780.5	266911	92223	117824	220455	280408	177561			p-cymene	0.156598	0.050962	71163	8718.64	0.114712	0.141899	0.110834	0.406945	0.0720223	0.0931766	47854.3	67320.7	69210	111808	65360	65425.3	143563	201962	207630	223615	196080	196276
limonene	0.215023	0.0526857	250935	37435.3	0.103657	0.328412	0.11112	0.181491	0.350433	9.37168	237314	164102	180548	316918	355790	735554	474629	328205	361097	950753	1423161	1471109			limonene	0.587555	0.192553	264795	46446.1	0.488905	0.817655	0.199728	1.43627	0.332942	0.249829	203956	387917	124719	394614	302144	175421	611867	1163752	374158	789227	906431	526263
1,8-cineole	2.01574	0.579921	2.39718e+06	443594	1.7879	4.30321	1.24419	1.27991	1.46348	5.37193	4.09324e+06	2150247	2.02157e+06	2234961	1.48585e+06	421626	8186489	4300494	4043149	6704883	5943415	843253			1,8-cineole	4.75355	0.760371	2.42958e+06	294428	4.13991	4.1378	5.63874	7.85599	2.28433	4.46456	1.72704e+06	1.96308e+06	3.52109e+06	2158420	2.07303e+06	3.13485e+06	5181119	5889247	10563262	4316840	6219077	9404560		1,8-cineole
y-terpinene	0.0589481	0.0120913	71588.9	9175.46	0.0444537	0.102236	0.0342464	0.0463776	0.067427	0.897595	101773	51085.5	55644	80984	68457.8	70449.5	203546	102171	111288	242952	273831	140899			y-terpinene	0.163532	0.0516059	76754.3	10147	0.0954985	0.149492	0.110998	0.418534	0.0990788	0.107591	39839	70923	69312.3	114992	89913.7	75546.3	119517	212769	207937	229983	269741	226639
trans-sabinene hydrate	0.0109907	0.00415824	17621.6	6769.7	0.011869	0	0.00315298	0.020892	0.0190397	0.110305	27173	0	5123	36481.3	19330.8	8657.5	54346	0	10246	109444	77323	17315			trans-sabinene hydrate	0.0384662	0.0180423	15638.2	4368.09	0.0269467	0.0423227	0.0133249	0.124963	0.0172243	0.00601521	11241.3	20079	8320.67	34333.5	15631	4223.67	33724	60237	24962	68667	46893	12671
terpinolene	0.0433595	0.00889331	53609.6	10271.6	0.0275774	0.0676627	0.0187406	0.0496147	0.0532022	0.0945508	63136	33810	30450	86636.7	54015.5	7421	126272	67620	60900	259910	216062	14842			terpinolene	0.113521	0.0330046	55014.6	8219.55	0.0783904	0.0916777	0.0608438	0.27703	0.0885395	0.0846449	32702	43494.3	37993.7	76113.5	80349.3	59434.7	98106	130483	113981	152227	241048	178304
linalool	0.1195	0.0464851	177102	84645.6	0.206815	0.0626295	0.047298	0.0257616	0.254996	0.149471	473484	31295	76850.5	44984.7	258894	11731.5	946969	62590	153701	134954	1035577	23463			linalool	0.181038	0.0345745	101115	17977.8	0.312216	0.241588	0.171948	0.0737092	0.15997	0.126797	130247	114616	107372	20251.5	145173	89032.7	390740	343848	322116	40503	435518	267098
camphor	0.368473	0.170206	570572	312028	0.17357	0.321143	0.301614	1.01644	0.0295966	0.363844	397374	160470	490066	1.7749e+06	30049	28557	794747	320940	980133	5324696	120196	57114			camphor	0.715997	0.572659	241780	154824	0.0288101	0.0246972	0.525755	3.55221	0.0348732	0.12964	12018.7	11717	328305	975964	31647.3	91028.7	36056	35151	984916	1951928	94942	273086
menthone	10.5315	2.38977	1.59564e+07	5.24686e+06	7.24042	8.58793	12.9766	18.6249	5.22772	5.81897	1.65763e+07	4.29126e+06	21084503	3.25225e+07	5.30763e+06	456713	33152621	8582513	42169006	97567643	21230518	913426			menthone	6.34356	0.462128	3.62301e+06	639258	4.92888	6.39133	8.31455	6.19061	5.67453	6.56144	2.05617e+06	3032216	5.19198e+06	1700860	5.14961e+06	4607214	6168524	9096648	15575954	3401720	15448843	13821642		menthone
pinocarvone	0	0	0	0	0	0	0	0	0	0	0	0	0	0	0	0	0	0	0	0	0	0			pinocarvone	0	0	0	0	0	0	0	0	0	0	0	0	0	0	0	0	0	0	0	0	0	0
menthofuran	0.201319	0.0847921	200532	35619.5	0.0587251	0.528505	0.0822938	0.175392	0.161679	3.82131	134446	264086	133712	306268	164151	299923	268892	528171	267424	918804	656603	599846			menthofuran	1.2687	0.91957	444087	234288	0.386544	0.477189	0.301362	5.86385	0.331473	0.251794	161254	226391	188184	1.61108e+06	300811	176801	483762	679173	564553	3222165	902432	530402		menthofuran
isomenthone	65.1711	5.3077	9.49447e+07	2.42411e+07	73.8829	72.9418	73.2117	58.4688	47.3502	58.4745	1.69148e+08	3.64479e+07	118955376	1.02098e+08	4.80741e+07	4.58948e+06	338296853	72895797	237910752	306292619	192296281	9178963			isomenthone	53.8755	4.65893	2.93805e+07	3.7761e+06	57.3147	67.2888	64.8449	51.3049	38.6352	43.8645	2.39099e+07	3.19236e+07	4.04921e+07	1.40959e+07	35061285	3.08001e+07	71729665	95770846	121476359	28191887	105183855	92400281		isomenthone
neomenthol	0.678322	0.472334	1.21362e+06	829525	0.502646	0.0749863	0.278917	2.53506	0	0	1.15077e+06	37469.5	453188	4426689	0	0	2301531	74939	906377	13280067	0	0			neomenthol	0.129164	0.0579168	97795.2	51262.9	0	0	0.157316	0.0398055	0.349905	0.227955	0	0	98235	10936.5	317538	160062	0	0	294705	21873	952614	480186
d-terpineol	0.112127	0.0413333	159474	52322.2	0.118727	0.039609	0.0350809	0.103888	0.26333	0.263197	271816	19792	57000	181407	267356	20657.5	543632	39584	114000	544222	1069423	41315			d-terpineol	0.134107	0.0390946	62038.4	14900.3	0.159529	0.277776	0.0785513	0.203282	0.0436119	0.0418924	66550.3	131784	49051	55851.5	39577.7	29415.3	199651	395353	147153	111703	118733	88246		d-terpineol
borneol	1.62983	0.484496	2.69061e+06	1.34881e+06	3.46594	1.22073	1.55388	0.609591	1.29904	1.7265	7.93496e+06	609980	2524759	1.06446e+06	1.3189e+06	135508	15869929	1219961	5049518	3193381	5275582	271016			borneol	1.56957	0.402898	912076	266304	1.54339	1.76056	3.39803	0.576751	1.02893	1.10978	643852	835257	2.12188e+06	158462	933753	779250	1931556	2505772	6365654	316923	2801259	2337751		borneol
trans-isopulegone	0.167184	0.0762534	220575	89262.9	0.177892	0.0911395	0.0413878	0.0674274	0.458076	0.0967549	407268	45541	67247.5	117741	465078	7594	814536	91082	134495	353223	1860313	15188			trans-isopulegone	0.283561	0.0719908	186225	66012.2	0.365264	0.223055	0.161783	0.0301203	0.501907	0.419234	152377	105823	101025	8275.5	455479	294371	457130	317470	303075	16551	1366436	883113
menthol	0.175084	0.122827	290070	218279	0.0351898	0.0247436	0.0716685	0.664638	0.0791818	0	80564	12364	116448	1.16058e+06	80392.2	0	161128	24728	232896	3481750	321569	0			menthol	0.0332987	0.0112941	23250.7	8794.23	0	0.0377108	0.0418542	0	0.0538558	0.0663714	0	17891	26135.7	0	48874	46603.7	0	53673	78407	0	146622	139811
terpinen-4-ol	0.074924	0.0180817	116644	41109.9	0.0952567	0.0389706	0.0251463	0.118031	0.0972154	0.405074	218082	19473	40858	206104	98701.5	31793	436164	38946	81716	618312	394806	63586			terpinen-4-ol	0.109405	0.00683224	61056.6	10598.9	0.128301	0.103949	0.0924334	0.121808	0.121283	0.0886544	53523.3	49316	57719.7	33466.5	110064	62250	160570	147948	173159	66933	330192	186750
cis-isopulegone	0.0060904	0.00375761	12446.6	7942.01	0.0166744	0	0	0.0137776	0	0	38174.5	0	0	24058.3	0	0	76349	0	0	72175	0	0			cis-isopulegone	0.00397481	0.00397481	2482.06	2482.06	0	0	0.0238489	0	0	0	0	0	14892.3	0	0	0	0	0	44677	0	0	0
isomenthol	0.0378147	0.0165334	73023.4	36882.8	0.085176	0	0.0243717	0.0680977	0.0114283	0	195003	0	39599.5	118911	11603	0	390006	0	79199	356734	46412	0			isomenthol	0.0157128	0.00603843	10937.4	4300.48	0	0.0106093	0.037169	0	0.0230436	0.0234551	0	5033.33	23210	0	20912	16469.3	0	15100	69630	0	62736	49408
neoisomenthol	0.0478029	0.0325319	86291.7	57138.7	0.0392288	0	0.0176482	0.175196	0.00694188	0	89811	0	28675	305925	7048	0	179622	0	57350	917774	28192	0			neoisomenthol	0.0133476	0.00636978	10289.4	5356.7	0	0	0.0246688	0	0.0361379	0.019279	0	0	15404.3	0	32795	13537	0	0	46213	0	98385	40611
a-terpineol	0.40715	0.116582	606250	255891	0.677144	0.300341	0.115028	0.25497	0.688267	0.783462	1550262	150076	186898	445226	698789	61491.5	3100524	300151	373797	1335678	2795155	122983			a-terpineol	0.489993	0.0813711	276312	48940	0.533505	0.802234	0.600739	0.237221	0.371909	0.394352	222562	380601	375129	65176	337506	276900	667685	1141804	1125386	130352	1012519	830700		a-terpineol
myrtenal	0	0	0	0	0	0	0	0	0	0	0	0	0	0	0	0	0	0	0	0	0	0			myrtenal	0	0	0	0	0	0	0	0	0	0	0	0	0	0	0	0	0	0	0	0	0	0
cis-dihydrocarvone	0	0	0	0	0	0	0	0	0	0	0	0	0	0	0	0	0	0	0	0	0	0			cis-dihydrocarvone	0	0	0	0	0	0	0	0	0	0	0	0	0	0	0	0	0	0	0	0	0	0
trans-dihydrocarvone	0	0	0	0	0	0	0	0	0	0	0	0	0	0	0	0	0	0	0	0	0	0			trans-dihydrocarvone	0	0	0	0	0	0	0	0	0	0	0	0	0	0	0	0	0	0	0	0	0	0
trans-carveol	0	0	0	0	0	0	0	0	0	0	0	0	0	0	0	0	0	0	0	0	0	0			trans-carveol	0	0	0	0	0	0	0	0	0	0	0	0	0	0	0	0	0	0	0	0	0	0
cis-carveol	0	0	0	0	0	0	0	0	0	0	0	0	0	0	0	0	0	0	0	0	0	0			cis-carveol	0	0	0	0	0	0	0	0	0	0	0	0	0	0	0	0	0	0	0	0	0	0
pulegone	13.7468	5.84507	1.80946e+07	5.78216e+06	8.23842	5.13832	6.68424	11.9939	36.6792	3.85278	1.88612e+07	2.56754e+06	1.08606e+07	20943630	3.72399e+07	302393	37722309	5135073	21721299	62830890	148959681	604786			pulegone	21.2975	7.14802	1.48176e+07	6.44688e+06	24.4855	8.66564	10.9903	0.941376	45.721	36.9813	10214572	4111210	6862864	258642	41491636	2.5967e+07	30643716	12333630	20588592	517283	124474908	77900927		pulegone
carvone	0.0288611	0.0166844	39562.4	28306.7	0	0.0238	0.0936107	0.0089116	0.0179833	0.187018	0	11892.5	152100	15561.3	18258.2	14678.5	0	23785	304200	46684	73033	29357			carvone	0.0212996	0.00970656	11417.1	5867.3	0	0.0506879	0	0.0403351	0.0367748	0	0	24047.7	0	11082	33373	0	0	72143	0	22164	100119	0
cis-piperitone oxide	0.000994097	0.000994097	2275.9	2275.9	0.00497049	0	0	0	0	0	11379.5	0	0	0	0	0	22759	0	0	0	0	0			cis-piperitone oxide	0	0	0	0	0	0	0	0	0	0	0	0	0	0	0	0	0	0	0	0	0	0
piperitone	1.84171	0.209615	2.64202e+06	653865	1.9033	2.27369	2.1957	1.7372	1.09865	1.00301	4357446	1.13613e+06	3.56761e+06	3.03347e+06	1.11544e+06	78723	8714892	2272253	7135217	9100408	4461777	157446			piperitone	1.05697	0.184847	593921	106917	1.14354	1.77557	1.15559	0.480863	0.663057	1.12318	477048	842377	721605	132116	601722	788658	1431145	2527132	2164816	264233	1805166	2365975
trans-piperitone oxide	0	0	0	0	0	0	0	0	0	0	0	0	0	0	0	0	0	0	0	0	0	0			trans-piperitone oxide	0	0	0	0	0	0	0	0	0	0	0	0	0	0	0	0	0	0	0	0	0	0
isopiperitenone	0.0499715	0.0179917	67206.2	20835	0.0470455	0.0288692	0.0194699	0.0347922	0.119681	0	107706	14425.5	31635	60753.7	121510	0	215413	28851	63270	182261	486042	0			isopiperitenone	0.0586952	0.0129996	37890.8	10498.3	0.0538032	0.0577891	0.0779406	0	0.0711767	0.0914615	22445	27416.7	48669.7	0	64592.7	64221	67335	82250	146009	0	193778	192663
neo-menthyl acetate	0	0	0	0	0	0	0	0	0	0	0	0	0	0	0	0	0	0	0	0	0	0			neo-menthyl acetate	0	0	0	0	0	0	0	0	0	0	0	0	0	0	0	0	0	0	0	0	0	0
bornyl acetate	0	0	0	0	0	0	0	0	0	0	0	0	0	0	0	0	0	0	0	0	0	0			bornyl acetate	0	0	0	0	0	0	0	0	0	0	0	0	0	0	0	0	0	0	0	0	0	0
menthyl acetate	0	0	0	0	0	0	0	0	0	0	0	0	0	0	0	0	0	0	0	0	0	0			menthyl acetate	0	0	0	0	0	0	0	0	0	0	0	0	0	0	0	0	0	0	0	0	0	0
carvacrol	0	0	0	0	0	0	0	0	0	0	0	0	0	0	0	0	0	0	0	0	0	0			carvacrol	0	0	0	0	0	0	0	0	0	0	0	0	0	0	0	0	0	0	0	0	0	0
piperitenone	0.0888936	0.0687538	104010	68326.5	0.0143742	0	0.00564403	0.0643485	0.360101	0	32908.5	0	9170.5	112365	365606	0	65817	0	18341	337094	1462423	0			piperitenone	0.124403	0.0625795	95282.9	54377.3	0.0690664	0.0128843	0.0285971	0	0.352737	0.283136	28812.3	6112.67	17857.3	0	320107	198808	86437	18338	53572	0	960322	596424
piperitenone oxide	0	0	0	0	0	0	0	0	0	0	0	0	0	0	0	0	0	0	0	0	0	0			piperitenone oxide	0	0	0	0	0	0	0	0	0	0	0	0	0	0	0	0	0	0	0	0	0	0
B-caryophyllene	0.00158932	0.00119558	1873.43	1251.31	0	0	0	0.0017774	0.00616919	0	0	0	0	3103.67	6263.5	0	0	0	0	9311	25054	0			B-caryophyllene	0	0	0	0	0	0	0	0	0	0	0	0	0	0	0	0	0	0	0	0	0	0
(E)-B-farnesene	0.00848143	0.00614046	10196.4	6578.94	0	0	0	0.0108451	0.031562	0	0	0	0	18937.7	32044.5	0	0	0	0	56813	128178	0			(E)-B-farnesene	0.00861647	0.00545808	5730.67	3653.71	0	0	0.0246667	0	0	0.0270321	0	0	15403	0	0	18981	0	0	46209	0	0	56943
a-humulene	0	0	0	0	0	0	0	0	0	0	0	0	0	0	0	0	0	0	0	0	0	0			a-humulene	0	0	0	0	0	0	0	0	0	0	0	0	0	0	0	0	0	0	0	0	0	0
y-muurolene	0.0531232	0.0265186	71276.2	27366.5	0.0438473	0.0122908	0.0146488	0.0386453	0.156184	0.0477022	100384	6141.5	23801.5	67482	158572	3744	200769	12283	47603	202446	634286	7488			y-muurolene	0.0688829	0.0144988	35203.9	6049.45	0.0410098	0.0725655	0.0446999	0.128861	0.0379171	0.0882438	17108	34427	27912.7	35404.5	34409.7	61961.7	51324	103281	83738	70809	103229	185885
germacrene D	0.24086	0.136047	316550	136015	0.172793	0.0350821	0.0494269	0.174911	0.772086	0.141979	395594	17530	80309.5	305427	783888	11143.5	791188	35060	160619	916280	3135553	22287			germacrene D	0.203688	0.0461443	102353	16372.5	0.1248	0.235283	0.104969	0.401149	0.120528	0.235399	52062.7	111625	65547.7	110215	109379	165289	156188	334874	196643	220430	328137	495866
bicyclogermacrene	0	0	0	0	0	0	0	0	0	0	0	0	0	0	0	0	0	0	0	0	0	0			bicyclogermacrene	0	0	0	0	0	0	0	0	0	0	0	0	0	0	0	0	0	0	0	0	0	0
a-muurolene	0.0190374	0.0101145	26626.7	10541.7	0.0176639	0	0.00547386	0.0145693	0.0574801	0.0537669	40440	0	8894	25440.7	58358.8	4220	80880	0	17788	76322	233435	8440			a-muurolene	0.0340904	0.00654839	17183.8	2424.28	0.0264258	0.0388827	0.021151	0.0608921	0.0172247	0.0399659	11024	18447	13207.7	16730	15631.3	28062.7	33072	55341	39623	33460	46894	84188
y-cadinene	0.0440882	0.023499	61498.2	24339.4	0.039836	0	0.0124584	0.0346561	0.133491	0.0794463	91201	0	20242.5	60516	135531	6235.5	182402	0	40485	181548	542125	12471			y-cadinene	0.0611374	0.0115744	31627.1	5238.69	0.0386143	0.0643134	0.042467	0.1078	0.035156	0.0784735	16108.7	30512	26518.3	29618	31904	55101.3	48326	91536	79555	59236	95712	165304
d-cadinene	0.0830772	0.0402628	116115	42207.1	0.0764897	0.00737766	0.0327096	0.0619044	0.236905	0.117911	175116	3686.5	53147	108097	240526	9254.5	350233	7373	106294	324290	962105	18509			d-cadinene	0.11818	0.0229125	61003.7	10265.7	0.0727212	0.123984	0.0832744	0.210551	0.0660311	0.152517	30337	58821.3	52000.3	57848.5	59923	107092	91011	176464	156001	115697	179769	321276
a-cadinene	0.0160541	0.00569217	19771.5	5989.89	0.0123377	0.0161742	0.0040657	0.0102631	0.0374301	0	28246	8082	6606	17921.3	38002.2	0	56492	16164	13212	53764	152009	0			a-cadinene	0.0186883	0.00312612	9941.06	1743.52	0.0111258	0.0202947	0.0131674	0.0301367	0.0127086	0.024697	4641.33	9628.33	8222.33	8280	11533	17341.3	13924	28885	24667	16560	34599	52024
																																																	Other
Response ÷ d.w.	143507726	30934320	143507726	30934320	228941360	4.99684e+07	162481349	1.74619e+08	1.01529e+08	7.84869e+06	228941360	4.99684e+07	162481349	1.74619e+08	1.01529e+08	7.84869e+06									Response ÷ d.w.	56674182	9200315	56674182	9200315	4.17169e+07	4.74427e+07	6.24446e+07	2.74748e+07	9.07497e+07	7.02165e+07	4.17169e+07	4.74427e+07	6.24446e+07	2.74748e+07	9.07497e+07	7.02165e+07								Response ÷ d.w.
Fold diff. T-to-C ÷ d.w.	0.39		0.39
Fold diff. Rhiz.-to-Root ÷ d.w.	778		778																						Fold diff. Rhiz.-to-Root ÷ d.w.	336		336
					% Total Response						Peak Area per mg d.w.						d.w (mg)													% Total Response						Peak Area per mg d.w.						d.w (mg)
Stem	% Total Response		Peak Area per mg d.w.														2	1	1	2	3	2			Stem	% Total Response		Peak Area per mg d.w.														2	2	1	2	2	2
CM-585 - Control	Avg.	Std. Error	Avg.	Std. Error	1	2	3	4	5	6	1	2	3	4	5	6	1	2	3	4	5	6			CM-585 - Treamtent	Avg.	Std. Error	Avg.	Std. Error	1	2	3	4	5	6	1	2	3	4	5	6	1	2	3	4	5	6		Of Interest
a-thujene	0.0259602	0.00635627	67461.9	12920.6	0.0191055	0.0511795	0.0386086	0.0209092	0.011169	0.0147892	72161.5	65324	113328	87833	26123.7	40001	144323	65324	113328	175666	78371	80002			a-thujene	0.0311883	0.00640311	79586.2	8380.24	0.0307236	0.0299911	0.0159372	0.0157212	0.0366012	0.0581553	71192.5	116673	71433	81783.5	55349.5	81085.5	142385	233346	71433	163567	110699	162171
a-pinene	0.109731	0.0296098	280491	54083.1	0.0720178	0.23523	0.152825	0.0931681	0.037336	0.0678106	272012	300241	448588	391369	87326.7	183410	544024	300241	448588	782738	261980	366821			a-pinene	0.150066	0.0290779	427722	105998	0.10438	0.115374	0.0736852	0.178823	0.153975	0.274158	241868	448834	330269	930258	232846	382256	483735	897669	330269	1860515	465693	764512
camphene	0.0381199	0.00985548	98195.3	18544	0.025052	0.0801225	0.0512924	0.0342698	0.0135703	0.0244123	94621.5	102266	150559	143956	31740	66029	189243	102266	150559	287913	95220	132058			camphene	0.0559576	0.00999692	161055	40010.4	0.0407944	0.0457664	0.027026	0.0672447	0.0577659	0.0971481	94528.5	178043	121135	349814	87355.5	135453	189057	356086	121135	699628	174711	270906
sabinene	0.0948759	0.0182629	256403	49043.6	0.0687208	0.162634	0.132188	0.0974501	0.0517053	0.0565576	259559	207581	388012	409356	120936	152974	519118	207581	388012	818713	362807	305948			sabinene	0.133525	0.0234078	386284	90299.4	0.0977746	0.116715	0.0716317	0.153141	0.125427	0.236462	226562	454050	321065	796656	189675	329697	453125	908100	321065	1593313	379350	659394
1-octen-3-ol	0	0	0	0	0	0	0	0	0	0	0	0	0	0	0	0	0	0	0	0	0	0			1-octen-3-ol	0	0	0	0	0	0	0	0	0	0	0	0	0	0	0	0	0	0	0	0	0	0
B-pinene	0.335042	0.0509329	928510	166203	0.313482	0.52046	0.423366	0.338513	0.17194	0.242495	1.18402e+06	664299	1242709	1421982	402157	655886	2368049	664299	1242709	2843964	1206472	1311772			B-pinene	0.369602	0.0656148	1.1039e+06	295976	0.294499	0.258757	0.241046	0.481801	0.295177	0.646329	682412	1006631	1080409	2.50638e+06	446376	901172	1364823	2013262	1080409	5012755	892752	1802344
3-octanone	0	0	0	0	0	0	0	0	0	0	0	0	0	0	0	0	0	0	0	0	0	0			3-octanone	0.00218641	0.00218641	3048.5	3048.5	0	0	0	0	0	0.0131185	0	0	0	0	0	18291	0	0	0	0	0	36582
myrcene	0.0469885	0.0100889	126051	25346	0.0321818	0.0806216	0.0727876	0.0425902	0.0166504	0.0370996	121551	102903	213654	178908	38944.3	100345	243102	102903	213654	357815	116833	200690			myrcene	0.0836576	0.0123926	255145	67419.9	0.0579607	0.0762625	0.0541241	0.108028	0.0736785	0.131892	134306	296681	242593	561975	111419	183896	268612	593362	242593	1123950	222838	367791
3-octanol	0.177814	0.0109035	523103	100697	0.190359	0.167238	0.135257	0.212994	0.1697	0.191336	718988	213458	397022	894718	396918	517514	1437975	213458	397022	1789436	1190755	1035029			3-octanol	0.187559	0.0418241	506862	110333	0.347169	0.188418	0.0452549	0.134637	0.245842	0.164034	804458	732995	202840	700398	371770	228711	1608916	1465990	202840	1400796	743539	457422
a-phellandrene	0.0061533	0.00157224	18737.3	5901.12	0.0104877	0.00476508	0.00302217	0.005449	0.00197468	0.0112212	39612	6082	8871	22889.5	4618.67	30350.5	79224	6082	8871	45779	13856	60701			a-phellandrene	0.00537474	0.000913247	14984.5	2391.64	0.00417143	0.0057928	0.00447752	0.0032087	0.00500816	0.0095898	9666	22535.5	20069	16692	7573.5	13371	19332	45071	20069	33384	15147	26742
a-terpinene	0.0209492	0.00356086	56613.6	8877.67	0.0212695	0.0347054	0.0206609	0.0165365	0.00827554	0.0242474	80335	44297	60646	69464.5	19356	65583	160670	44297	60646	138929	58068	131166			a-terpinene	0.0199456	0.00314478	53652.2	7221.94	0.0215101	0.0220411	0.0118943	0.0107361	0.0218614	0.0316307	49843	85745.5	53312	55850.5	33059.5	44102.5	99686	171491	53312	111701	66119	88205
p-cymene	0.039987	0.00648006	107640	15338.2	0.0377178	0.067974	0.0407259	0.0341926	0.0190793	0.0402326	142460	86760	119543	143632	44625.3	108819	284921	86760	119543	287264	133876	217638			p-cymene	0.0367466	0.00439762	103975	17433.4	0.0400528	0.0454876	0.0272625	0.0202425	0.0396351	0.0477991	92810	176958	122195	105304	59937.5	66646	185620	353917	122195	210607	119875	133292
limonene	0.0651234	0.0170224	165592	32945.4	0.0354591	0.130803	0.10228	0.0477133	0.0258261	0.0486593	133930	166953	300222	200428	60405.7	131611	267859	166953	300222	400856	181217	263222			limonene	0.108345	0.0166197	360795	124408	0.104258	0.116654	0.0560939	0.180135	0.100617	0.0923138	241585	453815	251422	937078	152156	128712	483170	907630	251422	1874157	304313	257425
1,8-cineole	1.04053	0.141979	2.78292e+06	342055	0.834955	1.57065	1.38132	0.752347	0.777344	0.926535	3153634	2004737	4054600	3160368	1.81816e+06	2506041	6307268	2004737	4054600	6320736	5454481	5012082			1,8-cineole	1.41381	0.219041	4.02942e+06	654680	1.24429	1.22089	1.11717	1.19817	1.19683	2.50552	2883266	4749568	5007350	6.23303e+06	1.80988e+06	3.49343e+06	5766532	9499136	5007350	12466053	3619757	6986865		1,8-cineole
y-terpinene	0.0399474	0.00605108	109343	17150.1	0.0390469	0.062246	0.0435696	0.0340343	0.0167961	0.0439918	147480	79449	127890	142967	39285	118986	294961	79449	127890	285934	117855	237973			y-terpinene	0.0432453	0.00634102	117154	13812.8	0.0478978	0.0433994	0.0269149	0.0262533	0.0469531	0.0680531	110988	168835	120637	136572	71004	94886	221977	337670	120637	273145	142008	189772
trans-sabinene hydrate	0.00790672	0.00202456	24851.9	6437.69	0.00678182	0	0.0123956	0.0102913	0.0129239	0.00504761	25615	0	36385	43230.5	30228.3	13652.5	51230	0	36385	86461	90685	27305			trans-sabinene hydrate	0.000569871	0.000569871	1320.5	1320.5	0.00341922	0	0	0	0	0	7923	0	0	0	0	0	15846	0	0	0	0	0
terpinolene	0.0254441	0.00306063	70455.1	10797.7	0.0227025	0.0370903	0.029524	0.0247068	0.0145411	0.0240999	85747.5	47341	86662	103786	34010.7	65184	171495	47341	86662	207571	102032	130368			terpinolene	0.0310184	0.00358942	89512.6	14721.3	0.0276568	0.0289932	0.0235603	0.0271429	0.030415	0.0483421	64086	112791	105601	141200	45994.5	67403	128172	225582	105601	282400	91989	134806
linalool	0.282948	0.0350406	857079	205064	0.297095	0.25334	0.263155	0.391737	0.144131	0.348229	1122131	323355	772441	1645562	337115	941872	2244262	323355	772441	3291124	1011344	1883744			linalool	0.230138	0.0593778	609833	210037	0.279811	0.414186	0.0921209	0.0344592	0.22057	0.339683	648376	1.61129e+06	412901	179260	333554	473618	1296753	3222579	412901	358521	667107	947236
camphor	0.078874	0.0268222	203043	65903.8	0.0203016	0.0696122	0.129237	0.0362263	0.186082	0.0317841	76679.5	88851	379351	152175	435235	85968	153359	88851	379351	304350	1305705	171936			camphor	0.119283	0.0345651	335503	119842	0.0354677	0.0463396	0.2024	0.0591064	0.141398	0.230988	82185.5	180273	907192	307478	213826	322064	164371	360546	907192	614955	427653	644129
menthone	1.22167	0.183248	3.17954e+06	298105	0.761515	1.95192	1.32773	0.969818	1.45948	0.859521	2.87625e+06	2491377	3897297	4.07389e+06	3413644	2.32479e+06	5752499	2491377	3897297	8147781	10240932	4649573			menthone	2.3041	0.459219	7.79789e+06	2.50424e+06	1.37649	1.93647	2.73664	3.37844	0.789889	3.60668	3.18959e+06	7.53339e+06	12266056	1.7575e+07	1.1945e+06	5028773	6379183	15066773	12266056	35150021	2388991	10057546		menthone
pinocarvone	0	0	0	0	0	0	0	0	0	0	0	0	0	0	0	0	0	0	0	0	0	0			pinocarvone	0	0	0	0	0	0	0	0	0	0	0	0	0	0	0	0	0	0	0	0	0	0
menthofuran	0.215306	0.0341508	592259	111103	0.24871	0.282015	0.259119	0.115765	0.101982	0.284241	939382	359956	760594	486292	238530	768800	1878763	359956	760594	972584	715589	1537600			menthofuran	0.245355	0.0553283	843430	346392	0.158821	0.152996	0.194176	0.483424	0.332159	0.150554	368018	595194	870328	2514820	502302	209917	736036	1190387	870328	5029640	1004604	419834		menthofuran
isomenthone	14.8498	1.74449	3.98401e+07	4.66909e+06	9.54524	20.7464	17.5477	13.1119	16.9795	11.1681	3.60525e+07	26480033	51507974	5.50789e+07	39714121	30206959	72104925	26480033	51507974	110157871	119142363	60413918			isomenthone	27.4843	5.1737	9.99388e+07	3.4854e+07	18.288	25.2552	39.5249	43.7412	10.0516	28.0451	42376800	9.82493e+07	177157063	2.27546e+08	15200317	39103098	84753600	196498663	177157063	455091905	30400634	78206196		isomenthone
neomenthol	0	0	0	0	0	0	0	0	0	0	0	0	0	0	0	0	0	0	0	0	0	0			neomenthol	0	0	0	0	0	0	0	0	0	0	0	0	0	0	0	0	0	0	0	0	0	0
d-terpineol	0.160785	0.0348803	408240	89836.7	0.178451	0.265772	0.175862	0.0194713	0.112769	0.212382	674010	339224	516210	81792.5	263761	574440	1348021	339224	516210	163585	791283	1148879			d-terpineol	0.172337	0.0471323	485699	184015	0.191274	0.356606	0.0758709	0.040959	0.132404	0.236907	443218	1.38729e+06	340066	213073	200226	330318	886436	2774581	340066	426146	400452	660637		d-terpineol
borneol	2.57608	0.343528	7.68758e+06	1.7864e+06	2.95833	2.73632	2.38031	3.25282	0.980714	3.14797	11173626	3492552	6986942	1.36641e+07	2.29383e+06	8514461	22347252	3492552	6986942	27328125	6881492	17028922			borneol	2.19259	0.294635	7.2288e+06	1.92993e+06	2.0088	3.60973	2.07499	1.9905	1.52343	1.9481	4.65477e+06	14042792	9300442	1.03548e+07	2.30378e+06	2.71622e+06	9309531	28085584	9300442	20709543	4607555	5432449		borneol
trans-isopulegone	0.775185	0.0346743	2.16948e+06	260737	0.704957	0.848293	0.879889	0.654468	0.790987	0.772518	2.66263e+06	1082736	2582745	2749208	1850070	2089463	5325259	1082736	2582745	5498416	5550210	4178926			trans-isopulegone	0.671287	0.0747317	1.92079e+06	310787	0.796626	0.764687	0.570651	0.367677	0.872664	0.65542	1.84594e+06	2974829	2557750	1.91269e+06	1.31967e+06	913847	3691871	5949658	2557750	3825383	2639341	1827694
menthol	0	0	0	0	0	0	0	0	0	0	0	0	0	0	0	0	0	0	0	0	0	0			menthol	0	0	0	0	0	0	0	0	0	0	0	0	0	0	0	0	0	0	0	0	0	0
terpinen-4-ol	0.082711	0.00802034	244774	50529.6	0.102912	0.0790617	0.0634462	0.0903941	0.0571407	0.103311	388700	100912	186234	379716	133649	279430	777400	100912	186234	759433	400946	558861			terpinen-4-ol	0.0666865	0.0121105	185831	43274.7	0.0948178	0.0987393	0.0337364	0.0291455	0.0677773	0.0759026	219711	384122	151212	151618	102495	105830	439422	768243	151212	303236	204990	211661
cis-isopulegone	0	0	0	0	0	0	0	0	0	0	0	0	0	0	0	0	0	0	0	0	0	0			cis-isopulegone	0.00139948	0.00139948	7280.25	7280.25	0	0	0	0.00839689	0	0	0	0	0	43681.5	0	0	0	0	0	87363	0	0
isomenthol	0	0	0	0	0	0	0	0	0	0	0	0	0	0	0	0	0	0	0	0	0	0			isomenthol	0	0	0	0	0	0	0	0	0	0	0	0	0	0	0	0	0	0	0	0	0	0
neoisomenthol	0	0	0	0	0	0	0	0	0	0	0	0	0	0	0	0	0	0	0	0	0	0			neoisomenthol	0	0	0	0	0	0	0	0	0	0	0	0	0	0	0	0	0	0	0	0	0	0
a-terpineol	0.791913	0.0963396	2.39197e+06	594415	1.06992	0.808343	0.576057	1.03797	0.486336	0.772849	4041110	1031745	1690904	4360189	1137510	2.09036e+06	8082220	1031745	1690904	8720378	3412530	4180719			a-terpineol	0.569145	0.152496	1.6796e+06	635992	0.563051	1.24039	0.275157	0.209937	0.437649	0.688684	1304698	4825444	1233300	1.09211e+06	661828	960228	2609396	9650888	1233300	2184225	1323655	1920456		a-terpineol
myrtenal	0	0	0	0	0	0	0	0	0	0	0	0	0	0	0	0	0	0	0	0	0	0			myrtenal	0	0	0	0	0	0	0	0	0	0	0	0	0	0	0	0	0	0	0	0	0	0
cis-dihydrocarvone	0	0	0	0	0	0	0	0	0	0	0	0	0	0	0	0	0	0	0	0	0	0			cis-dihydrocarvone	0	0	0	0	0	0	0	0	0	0	0	0	0	0	0	0	0	0	0	0	0	0
trans-dihydrocarvone	0	0	0	0	0	0	0	0	0	0	0	0	0	0	0	0	0	0	0	0	0	0			trans-dihydrocarvone	0	0	0	0	0	0	0	0	0	0	0	0	0	0	0	0	0	0	0	0	0	0
trans-carveol	0	0	0	0	0	0	0	0	0	0	0	0	0	0	0	0	0	0	0	0	0	0			trans-carveol	0	0	0	0	0	0	0	0	0	0	0	0	0	0	0	0	0	0	0	0	0	0
cis-carveol	0	0	0	0	0	0	0	0	0	0	0	0	0	0	0	0	0	0	0	0	0	0			cis-carveol	0	0	0	0	0	0	0	0	0	0	0	0	0	0	0	0	0	0	0	0	0	0
pulegone	75.1767	1.88321	2.18934e+08	3.53476e+07	80.5244	67.7877	72.3497	76.7448	74.9158	78.7377	304141365	86522189	212368675	3.2238e+08	175223425	2.12965e+08	608282730	86522189	212368675	644760191	525670275	425930699			pulegone	61.6559	5.56001	1.79089e+08	2.70459e+07	72.28	61.9542	51.0542	44.674	81.7098	58.263	1.67487e+08	241017777	228833335	232398913	123564210	8.12358e+07	334973069	482035554	228833335	464797826	247128420	162471531		pulegone
carvone	0.023613	0.00759501	55149.5	18298.3	0.00646146	0.0439347	0.0430725	0	0.0175226	0.0306866	24405	56077	126431	0	40984.3	82999.5	48810	56077	126431	0	122953	165999			carvone	0.0182039	0.00362043	50978.3	14575.3	0.0143967	0.011022	0.0275405	0.00660877	0.0218462	0.0278094	33360	42878.5	123441	34379.5	33036.5	38774.5	66720	85757	123441	68759	66073	77549
cis-piperitone oxide	0.00826981	0.00325183	26043.5	12036.7	0.021626	0	0.00581507	0.000957822	0.0106826	0.0105374	81681.5	0	17069	4023.5	24986	28501	163363	0	17069	8047	74958	57002			cis-piperitone oxide	0.0216346	0.00701188	86865.1	39488	0.0128561	0.0110363	0.0455617	0.0417875	0.00832346	0.0102428	29790	42934	204215	217383	12587	14281.5	59580	85868	204215	434766	25174	28563
piperitone	0.23997	0.059654	601456	112035	0.123488	0.342665	0.18199	0.139764	0.490961	0.160949	466417	437368	534196	587104	1.14833e+06	435326	932834	437368	534196	1174208	3444983	870651			piperitone	0.479472	0.128178	1.85209e+06	803357	0.32822	0.429534	0.544883	1.05783	0.134075	0.38229	760548	1670997	2442256	5.50294e+06	202752	533025	1521097	3341994	2442256	11005873	405504	1066050
trans-piperitone oxide	0.00342178	0.0013309	10657.2	4153.31	0.00695511	0	0	0.00246139	0.00745395	0.00366023	26269.5	0	0	10339.5	17434.3	9900	52539	0	0	20679	52303	19800			trans-piperitone oxide	0.00919585	0.00436391	41473.8	23191.7	0.00695648	0.00681883	0.0127365	0.0286633	0	0	16119.5	26527	57087	149110	0	0	32239	53054	57087	298219	0	0
isopiperitenone	0.0988251	0.0104952	290018	48071.8	0.0972809	0.0599983	0.0889945	0.0989024	0.138749	0.109026	367431	76580	261226	415457	324525	294888	734862	76580	261226	830914	973574	589775			isopiperitenone	0.084478	0.010613	252149	53471	0.0995058	0.122032	0.0618862	0.054408	0.0973303	0.0717055	230574	474736	277384	283036	147186	99978.5	461148	949473	277384	566072	294372	199957
neo-menthyl acetate	0	0	0	0	0	0	0	0	0	0	0	0	0	0	0	0	0	0	0	0	0	0			neo-menthyl acetate	0	0	0	0	0	0	0	0	0	0	0	0	0	0	0	0	0	0	0	0	0	0
bornyl acetate	0.000625653	0.000625653	2628.17	2628.17	0	0	0	0.00375392	0	0	0	0	0	15769	0	0	0	0	0	31538	0	0			bornyl acetate	0.000577575	0.000577575	2246.92	2246.92	0	0.00346545	0	0	0	0	0	13481.5	0	0	0	0	0	26963	0	0	0	0
menthyl acetate	0	0	0	0	0	0	0	0	0	0	0	0	0	0	0	0	0	0	0	0	0	0			menthyl acetate	0	0	0	0	0	0	0	0	0	0	0	0	0	0	0	0	0	0	0	0	0	0
carvacrol	0	0	0	0	0	0	0	0	0	0	0	0	0	0	0	0	0	0	0	0	0	0			carvacrol	0	0	0	0	0	0	0	0	0	0	0	0	0	0	0	0	0	0	0	0	0	0
piperitenone	0.789739	0.111213	2.3748e+06	461878	0.944347	0.345589	0.611366	0.77495	1.05696	1.00522	3.56681e+06	441099	1794547	3.25532e+06	2472159	2.71887e+06	7133617	441099	1794547	6510631	7416477	5437741			piperitenone	0.608534	0.0891966	1872123	439514	0.662434	0.87901	0.368737	0.551824	0.81989	0.369309	1534987	3.41958e+06	1652741	2870645	1239864	514924	3069974	6839153	1652741	5741290	2479728	1029849
piperitenone oxide	0.0123435	0.00300595	40158.3	10794	0.0165307	0	0.0112097	0.0158553	0.00928013	0.0211852	62436.5	0	32904	66603	21705.7	57300.5	124873	0	32904	133206	65117	114601			piperitenone oxide	0.00765205	0.00262373	18447.7	8105.3	0.0142265	0.0128743	0	0	0.011932	0.00687947	32965.5	50084.5	0	0	18044	9592	65931	100169	0	0	36088	19184
B-caryophyllene	0.00123241	0.000581307	3828.19	1937.95	0	0	0	0.0027223	0.00301618	0.00165598	0	0	0	11435.5	7054.67	4479	0	0	0	22871	21164	8958			B-caryophyllene	0.000334768	0.000334768	1302.33	1302.33	0	0.00200861	0	0	0	0	0	7814	0	0	0	0	0	15628	0	0	0	0
(E)-B-farnesene	0.0183052	0.00677134	63401.2	27689.3	0.027896	0	0	0.0418666	0.0251464	0.0149219	105364	0	0	175868	58816	40360	210727	0	0	351736	176448	80720			(E)-B-farnesene	0.00714103	0.00323071	31182.5	17069.8	0.00800948	0.00518629	0.0081744	0.021476	0	0	18559.5	20176	36639	111720	0	0	37119	40352	36639	223441	0	0
a-humulene	0	0	0	0	0	0	0	0	0	0	0	0	0	0	0	0	0	0	0	0	0	0			a-humulene	0	0	0	0	0	0	0	0	0	0	0	0	0	0	0	0	0	0	0	0	0	0
y-muurolene	0.0559015	0.00673107	170634	35521.1	0.0663702	0.0281274	0.0624504	0.0647681	0.0701681	0.0435248	250681	35901	183311	272070	164119	117724	501362	35901	183311	544140	492357	235447			y-muurolene	0.0400863	0.00463501	127140	32158.8	0.0360594	0.038896	0.0334519	0.0501129	0.0254964	0.0565014	83556.5	151316	149937	260692	38556.5	78779.5	167113	302631	149937	521385	77113	157559
germacrene D	0.241101	0.0597195	778107	250669	0.251386	0.0529878	0.203576	0.436534	0.376958	0.125166	949486	67632	597558	1833740	881682	338543	1898972	67632	597558	3667480	2645046	677086			germacrene D	0.178864	0.0413648	657161	271320	0.116304	0.199733	0.13939	0.367878	0.0808841	0.168996	269498	777014	624768	1.91374e+06	122316	235630	538996	1554029	624768	3827481	244631	471260
bicyclogermacrene	0.000183751	0.000183751	497	497	0	0	0	0	0	0.00110251	0	0	0	0	0	2982	0	0	0	0	0	5964			bicyclogermacrene	0	0	0	0	0	0	0	0	0	0	0	0	0	0	0	0	0	0	0	0	0	0
a-muurolene	0.0243578	0.00208542	73040.9	13245	0.0268403	0.0144786	0.0239621	0.0259449	0.025915	0.0290061	101376	18480	70336	108986	60613.7	78454	202752	18480	70336	217972	181841	156908			a-muurolene	0.019666	0.00314775	61162.1	15992.8	0.0206737	0.0154721	0.0151915	0.0253843	0.0100534	0.0312212	47905	60190.5	68091	132052	15203	43531.5	95810	120381	68091	264103	30406	87063
y-cadinene	0.0584093	0.00841528	181718	43094.1	0.0884143	0.025408	0.0546205	0.0637744	0.0658637	0.0523748	333942	32430	160328	267896	154051	141660	667883	32430	160328	535791	462154	283321			y-cadinene	0.0370459	0.0038598	115161	25770.8	0.0361196	0.0367452	0.0313926	0.0410146	0.0244652	0.0525381	83696	142948	140707	213362	36997	73253.5	167392	285897	140707	426724	73994	146507
d-cadinene	0.120417	0.0173674	367011	76577.6	0.153024	0.0523594	0.104138	0.118864	0.118191	0.175927	577972	66830	305678	499308	276441	475839	1155944	66830	305678	998615	829323	951678			d-cadinene	0.0900419	0.0141065	281450	74705.5	0.0922021	0.0712765	0.0705291	0.11794	0.0471403	0.141164	213650	277284	316123	613536	71287	196824	427300	554568	316123	1227071	142574	393647
a-cadinene	0.0167572	0.00375568	54399	14543	0.0282304	0	0.0166913	0.018332	0.0193884	0.0179011	106626	0	48994	77007	45348.3	48418	213253	0	48994	154014	136045	96836			a-cadinene	0.011752	0.000958637	35881.4	7453.47	0.0123663	0.010809	0.00961834	0.0125446	0.0094463	0.0157277	28655	42050	43111	65258.5	14285	21929	57310	84100	43111	130517	28570	43858
																																																	Other
Response ÷ d.w.	287217474	42609057	287217474	42609057	3.77701e+08	127637018	293530636	4.20068e+08	2.33894e+08	2.70475e+08	3.77701e+08	127637018	293530636	4.20068e+08	2.33894e+08	2.70475e+08									Response ÷ d.w.	313304052	65803756	313304052	65803756	2.31719e+08	3.89026e+08	448216475	520210218	1.51223e+08	139429322	2.31719e+08	3.89026e+08	448216475	520210218	1.51223e+08	139429322								Response ÷ d.w.
Fold diff. T-to-C ÷ d.w.	1.09		1.09
Fold diff. S-to-Root ÷ d.w.	1558		1558																						Fold diff. S-to-Root ÷ d.w.	1855		1855
Fold diff. S-to-Rhiz. ÷ d.w.	2		2																						Fold diff. S-to-Rhiz. ÷ d.w.	5.53		5.53
[truncated: 35 more columns]

## Sheet: M.longifoliaCMEN584
					% Total Response						Peak Area per mg d.w.						d.w (mg)													% Total Response						Peak Area per mg d.w.						d.w (mg)
Root	% Total Response		Peak Area per mg d.w.							X						X	4	2	2	6	6	2			Root	% Total Response		Peak Area per mg d.w.		X	X					X	X					1	5	5	6	3	6
CM-584 - Control	Avg.	Std. Error	Avg.	Std. Error	1	2	3	4	5	6	1	2	3	4	5	6	1	2	3	4	5	6			CM-584 - Treamtent	Avg.	Std. Error	Avg.	Std. Error	1	2	3	4	5	6	1	2	3	4	5	6	1	2	3	4	5	6		Of Interest
a-thujene	0	0	0	0	0	0	0	0	0	0	0	0	0	0	0	0	0	0	0	0	0	0			a-thujene	0	0	0	0	0	0	0	0	0	0	0	0	0	0	0	0	0	0	0	0	0	0
a-pinene	0	0	0	0	0	0	0	0	0	0.426127	0	0	0	0	0	30790.5	0	0	0	0	0	61581			a-pinene	0	0	0	0	0	0	0	0	0	0	0	0	0	0	0	0	0	0	0	0	0	0
camphene	0	0	0	0	0	0	0	0	0	0.202521	0	0	0	0	0	14633.5	0	0	0	0	0	29267			camphene	0	0	0	0	0	0	0	0	0	0	0	0	0	0	0	0	0	0	0	0	0	0
sabinene	0	0	0	0	0	0	0	0	0	0.314698	0	0	0	0	0	22739	0	0	0	0	0	45478			sabinene	0	0	0	0	0	0	0	0	0	0	0	0	0	0	0	0	0	0	0	0	0	0
1-octen-3-ol	0.636394	0.407102	917.4	585.008	1.96325	0	0	0	1.21872	0	2809.5	0	0	0	1777.5	0	11238	0	0	0	10665	0			1-octen-3-ol	1.17105	0.426991	2910.12	1051.62	0	0	2.18276	0.382627	1.3443	1.94557	0	0	4788.6	1107.5	5522	3132.5	0	0	23943	6645	16566	18795
B-pinene	0	0	0	0	0	0	0	0	0	0.638591	0	0	0	0	0	46142.5	0	0	0	0	0	92285			B-pinene	0	0	0	0	0	0	0	0	0	0	0	0	0	0	0	0	0	0	0	0	0	0
3-octanone	0	0	0	0	0	0	0	0	0	0	0	0	0	0	0	0	0	0	0	0	0	0			3-octanone	0	0	0	0	0	0	0	0	0	0	0	0	0	0	0	0	0	0	0	0	0	0
myrcene	0	0	0	0	0	0	0	0	0	0.223813	0	0	0	0	0	16172	0	0	0	0	0	32344			myrcene	0	0	0	0	0	0	0	0	0	0	0	0	0	0	0	0	0	0	0	0	0	0
3-octanol	0.102373	0.102373	146.5	146.5	0.511863	0	0	0	0	0.259263	732.5	0	0	0	0	18733.5	2930	0	0	0	0	37467			3-octanol	0.119678	0.119678	491.6	491.6	0	0	0	0	0.598388	0	0	0	0	0	2458	0	0	0	0	0	7374	0
a-phellandrene	0	0	0	0	0	0	0	0	0	0	0	0	0	0	0	0	0	0	0	0	0	0			a-phellandrene	0	0	0	0	0	0	0	0	0	0	0	0	0	0	0	0	0	0	0	0	0	0
a-terpinene	1.18006	0.521456	1625.68	464.951	1.12802	0.350403	2.99495	0	1.42693	0.104101	1614.25	2839	1594	0	2081.17	7522	6457	5678	3188	0	12487	15044			a-terpinene	1.52189	0.14539	3360	783.263	0	1.37157	1.49109	1.27053	1.38991	2.08635	0	782.8	3271.2	3677.5	5709.33	3359.17	0	3914	16356	22065	17128	20155
p-cymene	9.15715	5.10973	9195.27	2333.75	5.40199	1.52405	29.3708	3.67476	5.81422	0.222893	7730.5	12348	15632	1785.83	8480	16105.5	30922	24696	31264	10715	50880	32211			p-cymene	3.98815	0.546469	8443.83	2296.63	0	5.11517	5.09174	2.14623	3.88393	3.70368	0	2919.4	11170.4	6212.17	15954	5963.17	0	14597	55852	37273	47862	35779		p-cymene
limonene	9.3839	3.98999	19549.3	12234.5	2.28312	8.34684	24.5571	3.42371	8.3088	29.4433	3267.25	67627	13070	1663.83	12118.3	2127474	13069	135254	26140	9983	72710	4254948			limonene	11.8428	9.25215	12317.5	5544.95	4.58952	48.7001	1.23109	1.29656	5.79781	2.18821	2400	27794.8	2700.8	3752.83	23815.7	3523.17	2400	138974	13504	22517	71447	21139		limonene
1,8-cineole	2.05367	1.14073	1466.93	581.671	1.31687	0	6.47934	1.64927	0.822881	0	1884.5	0	3448.5	801.5	1200.17	0	7538	0	6897	4809	7201	0			1,8-cineole	1.21372	0.341123	2087.81	346.674	0	2.44632	1.38981	0.540515	0.682702	1.00927	0	1396.2	3049	1564.5	2804.33	1625	0	6981	15245	9387	8413	9750
y-terpinene	2.97322	0.803018	3387.45	550.462	2.82153	0.501906	5.57278	2.92026	3.04961	0.110474	4037.75	4066.5	2966	1419.17	4447.83	7982.5	16151	8133	5932	8515	26687	15965			y-terpinene	2.25765	0.421894	4284.98	779.67	0	3.78565	2.28222	1.32581	1.66135	2.23324	0	2160.6	5006.8	3837.5	6824.33	3595.67	0	10803	25034	23025	20473	21574		y-terpinene
trans-sabinene hydrate	0	0	0	0	0	0	0	0	0	0	0	0	0	0	0	0	0	0	0	0	0	0			trans-sabinene hydrate	0	0	0	0	0	0	0	0	0	0	0	0	0	0	0	0	0	0	0	0	0	0
terpinolene	0.106777	0.106777	155.733	155.733	0	0	0	0	0.533884	0.0767472	0	0	0	0	778.667	5545.5	0	0	0	0	4672	11091			terpinolene	0.70411	0.242964	1757.93	557.573	0	0	1.49593	0.541839	0.621435	0.861351	0	0	3281.8	1568.33	2552.67	1386.83	0	0	16409	9410	7658	8321
linalool	0	0	0	0	0	0	0	0	0	0	0	0	0	0	0	0	0	0	0	0	0	0			linalool	0	0	0	0	0	0	0	0	0	0	0	0	0	0	0	0	0	0	0	0	0	0
camphor	0.807919	0.248689	2216.68	1395.46	0.374726	0.932411	0.780678	0.277107	1.67467	0.0314435	536.25	7554.5	415.5	134.667	2442.5	2272	2145	15109	831	808	14655	4544			camphor	7.78274	2.93537	22444.7	12056.4	5.62599	6.49269	1.79941	14.6714	14.5833	1.36692	2942	3705.6	3947.6	42465.8	59903.7	2200.83	2942	18528	19738	254795	179711	13205		camphor
menthone	0	0	0	0	0	0	0	0	0	0	0	0	0	0	0	0	0	0	0	0	0	0			menthone	0	0	0	0	0	0	0	0	0	0	0	0	0	0	0	0	0	0	0	0	0	0
pinocarvone	3.21085	0.85859	3034.18	1124.03	2.85333	0	4.27447	4.32534	4.6011	0.00768787	4083.25	0	2275	2102	6710.67	555.5	16333	0	4550	12612	40264	1111			pinocarvone	3.41337	0.523829	6761.37	1307.22	0	4.78962	4.49288	2.50933	2.18622	3.0888	0	2733.6	9856.6	7263.17	8980.33	4973.17	0	13668	49283	43579	26941	29839
menthofuran	0	0	0	0	0	0	0	0	0	0	0	0	0	0	0	0	0	0	0	0	0	0			menthofuran	0	0	0	0	0	0	0	0	0	0	0	0	0	0	0	0	0	0	0	0	0	0
isomenthone	0	0	0	0	0	0	0	0	0	0	0	0	0	0	0	0	0	0	0	0	0	0			isomenthone	0	0	0	0	0	0	0	0	0	0	0	0	0	0	0	0	0	0	0	0	0	0
neomenthol	0	0	0	0	0	0	0	0	0	0	0	0	0	0	0	0	0	0	0	0	0	0			neomenthol	0	0	0	0	0	0	0	0	0	0	0	0	0	0	0	0	0	0	0	0	0	0
d-terpineol	0	0	0	0	0	0	0	0	0	0	0	0	0	0	0	0	0	0	0	0	0	0			d-terpineol	0	0	0	0	0	0	0	0	0	0	0	0	0	0	0	0	0	0	0	0	0	0
borneol	32.8178	10.352	50096.5	16996.2	69.1109	8.70014	19.7715	27.1767	39.3296	0.981272	98901	70489.5	10523	13207.2	57362	70903.5	395604	140979	21046	79243	344172	141807			borneol	51.4352	9.95815	127042	34044.8	56.6768	15.3651	54.41	63.4361	49.5954	74.3696	29638	8769.4	119366	183614	203723	119740	29638	43847	596830	1101681	611169	718440		borneol
trans-isopulegone	0	0	0	0	0	0	0	0	0	0	0	0	0	0	0	0	0	0	0	0	0	0			trans-isopulegone	0	0	0	0	0	0	0	0	0	0	0	0	0	0	0	0	0	0	0	0	0	0
menthol	0	0	0	0	0	0	0	0	0	0	0	0	0	0	0	0	0	0	0	0	0	0			menthol	0	0	0	0	0	0	0	0	0	0	0	0	0	0	0	0	0	0	0	0	0	0
terpinen-4-ol	5.50977	1.72793	6089.2	2139.51	9.46929	0.349785	3.26175	9.0245	5.44352	0.0286686	13551	2834	1736	4385.67	7939.33	2071.5	54204	5668	3472	26314	47636	4143			terpinen-4-ol	5.58055	1.27351	11970.6	3348.88	0.64827	4.31339	9.90252	2.74046	4.04801	6.89837	339	2461.8	21724.4	7932.17	16628	11106.8	339	12309	108622	47593	49884	66641		terpinen-4-ol
cis-isopulegone	0	0	0	0	0	0	0	0	0	0	0	0	0	0	0	0	0	0	0	0	0	0			cis-isopulegone	0	0	0	0	0	0	0	0	0	0	0	0	0	0	0	0	0	0	0	0	0	0
isomenthol	0	0	0	0	0	0	0	0	0	0	0	0	0	0	0	0	0	0	0	0	0	0			isomenthol	0	0	0	0	0	0	0	0	0	0	0	0	0	0	0	0	0	0	0	0	0	0
neoisomenthol	0	0	0	0	0	0	0	0	0	0	0	0	0	0	0	0	0	0	0	0	0	0			neoisomenthol	0	0	0	0	0	0	0	0	0	0	0	0	0	0	0	0	0	0	0	0	0	0
a-terpineol	0	0	0	0	0	0	0	0	0	0	0	0	0	0	0	0	0	0	0	0	0	0			a-terpineol	0	0	0	0	0	0	0	0	0	0	0	0	0	0	0	0	0	0	0	0	0	0
myrtenal	0	0	0	0	0	0	0	0	0	0.0869677	0	0	0	0	0	6284	0	0	0	0	0	12568			myrtenal	0	0	0	0	0	0	0	0	0	0	0	0	0	0	0	0	0	0	0	0	0	0
cis-dihydrocarvone	0.678046	0.678046	5493.6	5493.6	0	3.39023	0	0	0	1.09389	0	27468	0	0	0	79041	0	54936	0	0	0	158082			cis-dihydrocarvone	0	0	0	0	0	0	0	0	0	0	0	0	0	0	0	0	0	0	0	0	0	0		cis-dihydrocarvone
trans-dihydrocarvone	0.0340529	0.0340529	275.9	275.9	0	0.170264	0	0	0	0.12931	0	1379.5	0	0	0	9343.5	0	2759	0	0	0	18687			trans-dihydrocarvone	0	0	0	0	0	0	0	0	0	0	0	0	0	0	0	0	0	0	0	0	0	0
trans-carveol	0.20918	0.20918	1694.8	1694.8	0	1.0459	0	0	0	0.132348	0	8474	0	0	0	9563	0	16948	0	0	0	19126			trans-carveol	0	0	0	0	0	0	0	0	0	0	0	0	0	0	0	0	0	0	0	0	0	0
cis-carveol	0	0	0	0	0	0	0	0	0	0.0111824	0	0	0	0	0	808	0	0	0	0	0	1616			cis-carveol	0	0	0	0	0	0	0	0	0	0	0	0	0	0	0	0	0	0	0	0	0	0
pulegone	0	0	0	0	0	0	0	0	0	0	0	0	0	0	0	0	0	0	0	0	0	0			pulegone	0	0	0	0	0	0	0	0	0	0	0	0	0	0	0	0	0	0	0	0	0	0
carvone	23.8683	13.1798	128008	118103	2.76511	74.0786	2.9367	24.0322	15.529	65.1831	3957	600193	1563	11679	22649	4.70991e+06	15828	1200386	3126	70074	135894	9419825			carvone	7.13004	2.33104	18681.4	9643.22	32.4594	7.62036	10.9071	3.77883	13.0953	0.248644	16974	4349.2	23928.2	10937.7	53791.7	400.333	16974	21746	119641	65626	161375	2402		carvone
cis-piperitone oxide	0	0	0	0	0	0	0	0	0	0	0	0	0	0	0	0	0	0	0	0	0	0			cis-piperitone oxide	0	0	0	0	0	0	0	0	0	0	0	0	0	0	0	0	0	0	0	0	0	0
piperitone	0.182436	0.121794	1075.9	969.303	0	0.609471	0	0	0.30271	0.291655	0	4938	0	0	441.5	21074	0	9876	0	0	2649	42148			piperitone	0	0	0	0	0	0	0	0	0	0	0	0	0	0	0	0	0	0	0	0	0	0
trans-piperitone oxide	0	0	0	0	0	0	0	0	0	0	0	0	0	0	0	0	0	0	0	0	0	0			trans-piperitone oxide	0	0	0	0	0	0	0	0	0	0	0	0	0	0	0	0	0	0	0	0	0	0
isopiperitenone	0	0	0	0	0	0	0	0	0	0	0	0	0	0	0	0	0	0	0	0	0	0			isopiperitenone	0	0	0	0	0	0	0	0	0	0	0	0	0	0	0	0	0	0	0	0	0	0
neo-menthyl acetate	0	0	0	0	0	0	0	0	0	0	0	0	0	0	0	0	0	0	0	0	0	0			neo-menthyl acetate	0	0	0	0	0	0	0	0	0	0	0	0	0	0	0	0	0	0	0	0	0	0
bornyl acetate	0	0	0	0	0	0	0	0	0	0	0	0	0	0	0	0	0	0	0	0	0	0			bornyl acetate	0	0	0	0	0	0	0	0	0	0	0	0	0	0	0	0	0	0	0	0	0	0
menthyl acetate	0	0	0	0	0	0	0	0	0	0	0	0	0	0	0	0	0	0	0	0	0	0			menthyl acetate	0	0	0	0	0	0	0	0	0	0	0	0	0	0	0	0	0	0	0	0	0	0
carvacrol	0	0	0	0	0	0	0	0	0	0	0	0	0	0	0	0	0	0	0	0	0	0			carvacrol	0	0	0	0	0	0	0	0	0	0	0	0	0	0	0	0	0	0	0	0	0	0
piperitenone	0	0	0	0	0	0	0	0	0	0	0	0	0	0	0	0	0	0	0	0	0	0			piperitenone	0	0	0	0	0	0	0	0	0	0	0	0	0	0	0	0	0	0	0	0	0	0
piperitenone oxide	0	0	0	0	0	0	0	0	0	0	0	0	0	0	0	0	0	0	0	0	0	0			piperitenone oxide	0	0	0	0	0	0	0	0	0	0	0	0	0	0	0	0	0	0	0	0	0	0
B-caryophyllene	0	0	0	0	0	0	0	0	0	0	0	0	0	0	0	0	0	0	0	0	0	0			B-caryophyllene	0	0	0	0	0	0	0	0	0	0	0	0	0	0	0	0	0	0	0	0	0	0
(E)-B-farnesene	0	0	0	0	0	0	0	0	0	0	0	0	0	0	0	0	0	0	0	0	0	0			(E)-B-farnesene	0	0	0	0	0	0	0	0	0	0	0	0	0	0	0	0	0	0	0	0	0	0
a-humulene	0	0	0	0	0	0	0	0	0	0	0	0	0	0	0	0	0	0	0	0	0	0			a-humulene	0	0	0	0	0	0	0	0	0	0	0	0	0	0	0	0	0	0	0	0	0	0
y-muurolene	0.120832	0.120832	176.233	176.233	0	0	0	0	0.604162	0	0	0	0	0	881.167	0	0	0	0	0	5287	0			y-muurolene	0	0	0	0	0	0	0	0	0	0	0	0	0	0	0	0	0	0	0	0	0	0
germacrene D	0	0	0	0	0	0	0	0	0	0	0	0	0	0	0	0	0	0	0	0	0	0			germacrene D	0	0	0	0	0	0	0	0	0	0	0	0	0	0	0	0	0	0	0	0	0	0
bicyclogermacrene	0	0	0	0	0	0	0	0	0	0	0	0	0	0	0	0	0	0	0	0	0	0			bicyclogermacrene	0	0	0	0	0	0	0	0	0	0	0	0	0	0	0	0	0	0	0	0	0	0
a-muurolene	1.61322	1.06087	1330.6	850.639	0	0	0	5.25578	2.81032	0	0	0	0	2554.17	4098.83	0	0	0	0	15325	24593	0			a-muurolene	0.333013	0.20403	844.373	522.599	0	0	0.852939	0.812126	0	0	0	0	1871.2	2350.67	0	0	0	0	9356	14104	0	0
y-cadinene	2.18492	1.47589	1741.1	1091.64	0	0	0	7.43216	3.49242	0	0	0	0	3611.83	5093.67	0	0	0	0	21671	30562	0			y-cadinene	0.484795	0.373951	1334.15	1084.21	0	0	0.492929	1.93104	0	0	0	0	1081.4	5589.33	0	0	0	0	5407	33536	0	0
d-cadinene	2.10868	1.3998	1717.77	1089.91	0	0	0	6.98049	3.56292	0	0	0	0	3392.33	5196.5	0	0	0	0	20354	31179	0			d-cadinene	0.688157	0.359076	1973.17	1012.26	0	0	1.01977	1.90905	0.511965	0	0	0	2237.2	5525.67	2103	0	0	0	11186	33154	6309	0
a-cadinene	1.06044	0.748426	802.133	493.345	0	0	0	3.82771	1.47447	0	0	0	0	1860.17	2150.5	0	0	0	0	11161	12903	0			a-cadinene	0.333074	0.207772	829.847	508.246	0	0	0.95787	0.707501	0	0	0	0	2101.4	2047.83	0	0	0	0	10507	12287	0	0
																																																	Other
Response ÷ d.w.	240197	144034	240197	144034	143105	810211	53223	48597.3	145849	7225669	143105	810211	53223	48597.3	145849	7225669									Response ÷ d.w.	227536	59564	227536	59564	52293	57073.4	219383	289446	410770	161007	52293	57073.4	219383	289446	410770	161007								Response ÷ d.w.
Fold diff. T-to-C ÷ d.w.	0.95		0.95
					% Total Response						Peak Area per mg d.w.						d.w (mg)													% Total Response						Peak Area per mg d.w.						d.w (mg)
Rhizome	% Total Response		Peak Area per mg d.w.														3	4	3	4	2	2			Rhizome	% Total Response		Peak Area per mg d.w.														1	2	3	3	2	4
CM-584 - Control	Avg.	Std. Error	Avg.	Std. Error	1	2	3	4	5	6	1	2	3	4	5	6	1	2	3	4	5	6			CM-584 - Treamtent	Avg.	Std. Error	Avg.	Std. Error	1	2	3	4	5	6	1	2	3	4	5	6	1	2	3	4	5	6		Of Interest
a-thujene	0.184422	0.043674	99504.5	22583.1	0.278899	0.340215	0.190397	0.0933513	0.069785	0.133883	161658	169840	34147.3	89681.8	55366	86333.5	484975	679361	102442	358727	110732	172667			a-thujene	0.223956	0.0564902	170005	48996.5	0.414404	0.176278	0.208146	0.353117	0.0348236	0.156968	384668	161340	184417	102310	162253	25043.5	384668	322679	553252	306929	324506	100174
a-pinene	0.526159	0.126235	288078	67624.9	0.886633	0.925615	0.476947	0.223995	0.246484	0.397281	513920	462081	85539.3	215190	195555	256184	1541760	1848323	256618	860759	391110	512368			a-pinene	0.717688	0.195971	480362	157094	1.30398	0.464308	0.583655	1.25085	0.0566812	0.646654	1210414	424960	517119	362413	264094	103171	1210414	849921	1551358	1087239	528188	412683
camphene	0.400297	0.113783	219485	58879.6	0.612577	0.8525	0.297636	0.154901	0.147147	0.337021	355068	425580	53380.3	148812	116744	217326	1065205	1702322	160141	595248	233487	434652			camphene	0.570822	0.176905	384034	101947	0.868302	0.520082	0.372225	1.27084	0.0580971	0.335384	805997	476008	329792	368206	270691	53509	805997	952016	989377	1104617	541382	214036
sabinene	0.436537	0.10805	240452	55467.2	0.615884	0.88269	0.388112	0.233834	0.19685	0.301854	356986	440652	69607	224642	156176	194648	1070957	1762608	208821	898569	312353	389297			sabinene	0.757345	0.245932	470746	95387.4	0.844907	0.475485	0.677898	1.86882	0.0788753	0.598088	784281	435190	600619	541458	367503	95422.2	784281	870381	1801856	1624375	735006	381689
1-octen-3-ol	0	0	0	0	0	0	0	0	0	0	0	0	0	0	0	0	0	0	0	0	0	0			1-octen-3-ol	0	0	0	0	0	0	0	0	0	0	0	0	0	0	0	0	0	0	0	0	0	0
B-pinene	0.785242	0.189927	434670	100344	1.25492	1.46832	0.656353	0.355797	0.395119	0.580938	727392	733009	117715	341811	313479	374614	2182175	2932036	353146	1367244	626958	749228			B-pinene	1.09523	0.306698	728270	226389	1.84182	0.635405	1.09433	2.0749	0.080025	0.844886	1709658	581558	969578	601168	372860	134798	1709658	1163116	2908733	1803505	745719	539191
3-octanone	0.00661768	0.00418643	5814.04	3712.44	0	0	0	0.0202154	0.0194907	0	0	0	0	19420.8	15463.5	0	0	0	0	77683	30927	0			3-octanone	0.0944759	0.0565061	144487	77246.7	0.118194	0.356096	0	0	0.0925654	0	109713	325919	0	0	431289	0	109713	651838	0	0	862578	0
myrcene	0.573476	0.165063	309535	83210.2	0.793803	1.27673	0.55043	0.31115	0.229166	0.279579	460113	637362	98718.3	298919	181816	180284	1380339	2549446	296155	1195677	363632	360569			myrcene	0.881398	0.250335	592742	144437	1.08272	0.591553	1.11556	1.86035	0.0846232	0.553582	1005032	541422	988387	539005	394284	88321.5	1005032	1082845	2965162	1617015	788568	353286
3-octanol	0.963717	0.140821	615047	191025	1.00753	0.692106	1.0648	1.55401	0.894885	0.568975	583993	345510	190969	1.49293e+06	709984	366900	1751980	1382038	572906	5971709	1419967	733800			3-octanol	0.616398	0.175803	696182	367233	0.15217	0.23516	1.13945	1.13869	0.514772	0.518145	141251	215232	1.00956e+06	329915	2398471	82667.8	141251	430464	3028667	989746	4796942	330671
a-phellandrene	0.0108367	0.00225862	5827.65	1120.56	0.0128438	0.0196624	0.013393	0.0072604	0.00457914	0.00728161	7444.67	9815.75	2402	6975	3633	4695.5	22334	39263	7206	27900	7266	9391			a-phellandrene	0.0205977	0.0064013	15262.8	3538.66	0.0174318	0.0174552	0.0136512	0.051384	0.00636964	0.0172944	16181	15976	12095	14887.7	29678	2759.25	16181	31952	36285	44663	59356	11037
a-terpinene	0.064979	0.0140039	34814.9	7092.27	0.0828775	0.115251	0.0833558	0.0461928	0.026135	0.0360622	48038.3	57535	14949.7	44377	20735	23254.5	144115	230140	44849	177508	41470	46509			a-terpinene	0.0706337	0.0143596	67487.7	20034.2	0.132643	0.0688119	0.0760939	0.0678877	0.0264969	0.0518692	123125	62980.5	67419.3	19669.3	123456	8275.5	123125	125961	202258	59008	246913	33102
p-cymene	0.0999859	0.0206812	53104.2	10045.1	0.141038	0.164162	0.128861	0.0579015	0.0442594	0.0636929	81750	81952	23111	55625.5	35114.5	41072	245250	327808	69333	222502	70229	82144			p-cymene	0.101102	0.0206385	76039.2	17959.8	0.154022	0.0849134	0.106915	0.152219	0.0176455	0.0908989	142970	77717.5	94727	44103	82215.5	14502.5	142970	155435	284181	132309	164431	58010		p-cymene
limonene	17.8005	3.56394	1.02319e+07	1.93847e+06	22.4609	33.196	13.0102	9.11892	13.4318	15.5854	13019029	1.65719e+07	2333340	8.76047e+06	1.06565e+07	10050155	39057087	66287711	7000020	35041866	21313031	20100310			limonene	20.9502	4.61789	1.46285e+07	3.8034e+06	31.4678	19.1524	21.7032	33.4611	1.98459	17.932	29209827	17529338	1.92291e+07	9.6948e+06	9.24676e+06	2.86097e+06	29209827	35058676	57687340	29084396	18493515	11443877		limonene
1,8-cineole	0	0	0	0	0	0	0	0	0	0	0	0	0	0	0	0	0	0	0	0	0	0			1,8-cineole	0	0	0	0	0	0	0	0	0	0	0	0	0	0	0	0	0	0	0	0	0	0
y-terpinene	0.125726	0.026601	67863.7	13705	0.165113	0.222789	0.152189	0.0865013	0.0503233	0.0774405	95704.7	111220	27294.7	83101	39925.5	49937	287114	444878	81884	332404	79851	99874			y-terpinene	0.105849	0.0258181	112314	35526.5	0.212096	0.13099	0.123215	0.0725345	0.0470199	0.0492415	196877	119890	109168	21015.7	219080	7856.25	196877	239779	327505	63047	438159	31425		y-terpinene
trans-sabinene hydrate	0.00597547	0.00381873	4846.92	3651.96	0.00317961	0.00899362	0	0.0236796	0	0	1843	4489.75	0	22748.8	0	0	5529	17959	0	90995	0	0			trans-sabinene hydrate	0.0129891	0.0057288	31537.1	23397.6	0.0103292	0.0291388	0.00695973	0	0.0315066	0	9588	26669.5	6166.33	0	146798	0	9588	53339	18499	0	293597	0
terpinolene	0.128905	0.0357895	69770.4	17812.2	0.131201	0.29511	0.135132	0.0843952	0.0515705	0.0760223	76048	147324	24235.7	81077.8	40915	49022.5	228144	589294	72707	324311	81830	98045			terpinolene	0.162147	0.0378361	124224	27775.2	0.236542	0.14429	0.159205	0.293331	0.0323154	0.107197	219569	132062	141056	84987.7	150567	17102.8	219569	264124	423168	254963	301134	68411
linalool	0	0	0	0	0	0	0	0	0	0	0	0	0	0	0	0	0	0	0	0	0	0			linalool	0	0	0	0	0	0	0	0	0	0	0	0	0	0	0	0	0	0	0	0	0	0
camphor	0.128461	0.0894512	65450.3	44450.8	0.057896	0.573659	0.0671471	0.0392964	0.0123951	0.0203708	33558.3	286379	12042.7	37751.8	9834	13136	100675	1145517	36128	151007	19668	26272			camphor	1.04207	0.53123	1.61481e+06	830832	1.85837	3.22296	0.0366926	0.0240348	1.06614	0.0441974	1725021	2.94984e+06	32509.7	6963.67	4967460	7051.5	1725021	5899673	97529	20891	9934920	28206		camphor
menthone	0	0	0	0	0	0	0	0	0	0	0	0	0	0	0	0	0	0	0	0	0	0			menthone	0	0	0	0	0	0	0	0	0	0	0	0	0	0	0	0	0	0	0	0	0	0
pinocarvone	0.00721588	0.00270058	4908.67	1815.6	0.0166399	0.0105861	0	0.0105984	0.0054709	0	9645	5284.75	0	10181.8	4340.5	0	28935	21139	0	40727	8681	0			pinocarvone	0.0065482	0.0022529	12255.8	9694.75	0	0	0.0114435	0.00697653	0.0128996	0.00796952	0	0	10139	2021.33	60103	1271.5	0	0	30417	6064	120206	5086
menthofuran	0	0	0	0	0	0	0	0	0	0	0	0	0	0	0	0	0	0	0	0	0	0			menthofuran	0	0	0	0	0	0	0	0	0	0	0	0	0	0	0	0	0	0	0	0	0	0
isomenthone	0.00898466	0.00898466	7128.25	7128.25	0	0	0	0	0.053908	0	0	0	0	0	42769.5	0	0	0	0	0	85539	0			isomenthone	0	0	0	0	0	0	0	0	0	0	0	0	0	0	0	0	0	0	0	0	0	0
neomenthol	0	0	0	0	0	0	0	0	0	0	0	0	0	0	0	0	0	0	0	0	0	0			neomenthol	0	0	0	0	0	0	0	0	0	0	0	0	0	0	0	0	0	0	0	0	0	0
d-terpineol	0.00255974	0.000868352	1574.07	742.739	0.00414459	0.00389011	0.0024775	0.00484625	0	0	2402.33	1942	444.333	4655.75	0	0	7207	7768	1333	18623	0	0			d-terpineol	0.00494743	0.00080626	4884.67	1798.09	0.00536173	0.00568803	0.00322159	0.00825472	0.00283058	0.00432792	4977	5206	2854.33	2391.67	13188.5	690.5	4977	10412	8563	7175	26377	2762
borneol	0.959212	0.134409	578620	131004	1.26624	1.30955	0.840039	1.12319	0.471447	0.744816	733952	653745	150659	1.07903e+06	374036	480290	2201856	2614980	451977	4316138	748073	960580			borneol	1.07177	0.451994	2.88901e+06	2.50031e+06	0.873818	0.308496	0.633729	0.693064	3.30078	0.620759	811117	282352	561485	200804	1.53793e+07	99039.2	811117	564705	1684456	602411	30758565	396157		borneol
trans-isopulegone	0.0164207	0.00369283	8718.67	1667.46	0.0125327	0.0319241	0.0229759	0.0105747	0.0107786	0.00973802	7264.33	15937	4120.67	10159	8551.5	6279.5	21793	63748	12362	40636	17103	12559			trans-isopulegone	0.0198421	0.00661605	26741.9	11781.6	0.0395801	0.039124	0.00860758	0.015474	0.0162671	0	36740	35808.5	7626.33	4483.33	75793	0	36740	71617	22879	13450	151586	0
menthol	0	0	0	0	0	0	0	0	0	0	0	0	0	0	0	0	0	0	0	0	0	0			menthol	0	0	0	0	0	0	0	0	0	0	0	0	0	0	0	0	0	0	0	0	0	0
terpinen-4-ol	0.0635436	0.0171683	34819.9	10650.7	0.0653928	0.125813	0.0851308	0.0719063	0.0172937	0.0157247	37903.7	62807.8	15268	69079.8	13720.5	10140	113711	251231	45804	276319	27441	20280			terpinen-4-ol	0.0897868	0.013491	141333	85710.4	0.136436	0.0641056	0.0747606	0.0911263	0.120573	0.0517188	126646	58673	66238	26402.3	561786	8251.5	126646	117346	198714	79207	1123572	33006		terpinen-4-ol
cis-isopulegone	0	0	0	0	0	0	0	0	0	0	0	0	0	0	0	0	0	0	0	0	0	0			cis-isopulegone	0	0	0	0	0	0	0	0	0	0	0	0	0	0	0	0	0	0	0	0	0	0
isomenthol	0	0	0	0	0	0	0	0	0	0	0	0	0	0	0	0	0	0	0	0	0	0			isomenthol	0	0	0	0	0	0	0	0	0	0	0	0	0	0	0	0	0	0	0	0	0	0
neoisomenthol	0	0	0	0	0	0	0	0	0	0	0	0	0	0	0	0	0	0	0	0	0	0			neoisomenthol	0	0	0	0	0	0	0	0	0	0	0	0	0	0	0	0	0	0	0	0	0	0
a-terpineol	0	0	0	0	0	0	0	0	0	0	0	0	0	0	0	0	0	0	0	0	0	0			a-terpineol	0	0	0	0	0	0	0	0	0	0	0	0	0	0	0	0	0	0	0	0	0	0
myrtenal	0.0709406	0.00575418	42219.4	7703.21	0.0528566	0.0825611	0.0778488	0.0707355	0.055273	0.0863682	30637.3	41215.8	13962	67955	43852.5	55694	91912	164863	41886	271820	87705	111388			myrtenal	0.05508	0.0137104	59621.3	32102.5	0.0196069	0.0193137	0.0742745	0.105497	0.0461453	0.0656427	18200	17677	65807.3	30566	215004	10473	18200	35354	197422	91698	430009	41892
cis-dihydrocarvone	0.581181	0.0475545	363522	90425.9	0.533309	0.492531	0.632873	0.786827	0.572885	0.468659	309122	245879	113504	755898	454516	302212	927367	983515	340513	3023591	909031	604424			cis-dihydrocarvone	3.84363	2.60191	4.74968e+06	2.65907e+06	1.9949	16.7723	0.632702	0.873086	2.23054	0.558227	1851755	1.5351e+07	560575	252962	10392744	89062.5	1851755	30701907	1681724	758886	20785488	356250		cis-dihydrocarvone
trans-dihydrocarvone	0.0389735	0.00444062	22818.5	4681.78	0.0273496	0.0320203	0.0574378	0.0404469	0.0439537	0.0326327	15852.7	15985	10301.3	38857	34872	21043	47558	63940	30904	155428	69744	42086			trans-dihydrocarvone	0.21268	0.109759	301627	153883	0.239507	0.731756	0.0345951	0.0273079	0.186762	0.0561548	222321	669744	30651.3	7912	870176	8959.25	222321	1339488	91954	23736	1740352	35837
trans-carveol	0.0539506	0.0184516	27096.5	9568.18	0.0470621	0.110307	0.0997801	0.0569897	0.00956478	0	27278.7	55066.8	17895.3	54749.5	7588.5	0	81836	220267	53686	218998	15177	0			trans-carveol	0.165715	0.0653938	415952	348531	0.22217	0.0451469	0.0475729	0.142554	0.46204	0.0748063	206228	41321	42149.7	41302.7	2.15278e+06	11935	206228	82642	126449	123908	4305553	47740
cis-carveol	0.0361108	0.010216	21905.6	9544.29	0.0415017	0.0424146	0.0499087	0.0689105	0.013929	0	24055.7	21174	8951	66201.8	11051	0	72167	84696	26853	264807	22102	0			cis-carveol	0.0646209	0.0160562	125919	98813.8	0.0380826	0.0275906	0.0465104	0.0882064	0.132954	0.0543811	35350	25252.5	41208.3	25556.3	619472	8676.25	35350	50505	123625	76669	1238943	34705
pulegone	0.00826254	0.00826254	6555.33	6555.33	0	0	0	0	0.0495753	0	0	0	0	0	39332	0	0	0	0	0	78664	0			pulegone	0	0	0	0	0	0	0	0	0	0	0	0	0	0	0	0	0	0	0	0	0	0
carvone	74.9944	4.43574	4.65035e+07	9.9294e+06	68.8008	55.5888	79.9675	83.7496	82.2508	79.609	39879074	27750764	14341983	8.04575e+07	6.52561e+07	51335376	119637222	111003056	43025949	321829911	130512253	102670752			carvone	65.9837	5.81973	1.00202e+08	6.27287e+07	54.6171	55.3199	69.3251	52.7877	88.2323	75.6202	50698022	50631875	61422155	15294359	4.111e+08	12064854	50698022	101263750	184266465	45883077	822199447	48259416		carvone
cis-piperitone oxide	0	0	0	0	0	0	0	0	0	0	0	0	0	0	0	0	0	0	0	0	0	0			cis-piperitone oxide	0	0	0	0	0	0	0	0	0	0	0	0	0	0	0	0	0	0	0	0	0	0
piperitone	0.560304	0.135596	393878	162869	0.401489	0.299346	0.421245	1.21903	0.513366	0.507342	232715	149438	75549.3	1.17111e+06	407294	327156	698146	597751	226648	4684458	814589	654313			piperitone	0.468224	0.0995077	831635	589233	0.253726	0.241639	0.693528	0.28903	0.805046	0.526377	235520	221162	614467	83741.7	3.75094e+06	83981	235520	442323	1843401	251225	7501883	335924
trans-piperitone oxide	0	0	0	0	0	0	0	0	0	0	0	0	0	0	0	0	0	0	0	0	0	0			trans-piperitone oxide	0	0	0	0	0	0	0	0	0	0	0	0	0	0	0	0	0	0	0	0	0	0
isopiperitenone	0.00911625	0.00311088	6670.12	2397.35	0	0.00942279	0	0.0118178	0.0160837	0.0173732	0	4704	0	11353.2	12760.5	11203	0	18816	0	45413	25521	22406			isopiperitenone	0.0187187	0.00676722	23010.6	9129.81	0.028736	0.0468284	0.010588	0.014358	0.0118019	0	26674	42860	9381	4160	54988.5	0	26674	85720	28143	12480	109977	0
neo-menthyl acetate	0	0	0	0	0	0	0	0	0	0	0	0	0	0	0	0	0	0	0	0	0	0			neo-menthyl acetate	0	0	0	0	0	0	0	0	0	0	0	0	0	0	0	0	0	0	0	0	0	0
bornyl acetate	0.00920707	0.00311169	6514.04	2271.02	0	0.0172972	0	0.0146975	0.00901019	0.0142376	0	8635	0	14119.8	7148.5	9181	0	34540	0	56479	14297	18362			bornyl acetate	0.0151721	0.00392955	18762.3	11033.2	0.0246864	0	0.0092449	0.025474	0.0153433	0.0162838	22915	0	8191	7380.67	71489	2598	22915	0	24573	22142	142978	10392
menthyl acetate	0	0	0	0	0	0	0	0	0	0	0	0	0	0	0	0	0	0	0	0	0	0			menthyl acetate	0	0	0	0	0	0	0	0	0	0	0	0	0	0	0	0	0	0	0	0	0	0
carvacrol	0.0307822	0.0135852	16178	8424.86	0.0231406	0.0100488	0.0837851	0.0590845	0.00863395	0	13413	5016.5	15026.7	56762	6850	0	40239	20066	45080	227048	13700	0			carvacrol	0.0393791	0.0138255	76238.2	64545.3	0	0.0060819	0.0348216	0.0400403	0.0854776	0.0698531	0	5566.5	30852	11601	398265	11144.8	0	11133	92556	34803	796530	44579
piperitenone	0	0	0	0	0	0	0	0	0	0	0	0	0	0	0	0	0	0	0	0	0	0			piperitenone	0.000462857	0.000462857	2156.58	2156.58	0	0	0	0	0.00277714	0	0	0	0	0	12939.5	0	0	0	0	0	25879	0
piperitenone oxide	0	0	0	0	0	0	0	0	0	0	0	0	0	0	0	0	0	0	0	0	0	0			piperitenone oxide	0	0	0	0	0	0	0	0	0	0	0	0	0	0	0	0	0	0	0	0	0	0
B-caryophyllene	0.00102392	0.00102392	983.667	983.667	0	0	0	0.00614349	0	0	0	0	0	5902	0	0	0	0	0	23608	0	0			B-caryophyllene	0.0036333	0.0036333	3219.11	3219.11	0	0	0.0217998	0	0	0	0	0	19314.7	0	0	0	0	0	57944	0	0	0
(E)-B-farnesene	0	0	0	0	0	0	0	0	0	0	0	0	0	0	0	0	0	0	0	0	0	0			(E)-B-farnesene	0	0	0	0	0	0	0	0	0	0	0	0	0	0	0	0	0	0	0	0	0	0
a-humulene	0	0	0	0	0	0	0	0	0	0	0	0	0	0	0	0	0	0	0	0	0	0			a-humulene	0	0	0	0	0	0	0	0	0	0	0	0	0	0	0	0	0	0	0	0	0	0
y-muurolene	0.0406125	0.015323	19672	7005.03	0.029176	0.100061	0.0715352	0.029033	0.0101206	0.00374975	16911.3	49951.8	12829.7	27891.8	8029.5	2418	50734	199807	38489	111567	16059	4836			y-muurolene	0.0600253	0.0196177	49609.2	18966.5	0.12175	0.00921709	0.10994	0.0645283	0.0114169	0.0432996	113014	8436	97406.7	18696	53194.5	6908.25	113014	16872	292220	56088	106389	27633
germacrene D	0.102315	0.0441121	54564.9	23264.2	0.0467407	0.306145	0.120764	0.0984674	0.0287718	0.0129993	27092.3	152832	21658.7	94596.8	22827	8382.5	81277	611329	64976	378387	45654	16765			germacrene D	0.214679	0.0773374	176925	57848.5	0.233364	0.0337621	0.399934	0.480037	0.0662509	0.0747264	216619	30901	354342	139083	308682	11922.2	216619	61802	1063027	417248	617364	47689
bicyclogermacrene	0.0150538	0.00774014	9721.53	4786.27	0.0181489	0.0466482	0	0.0255254	0	0	10519.7	23287.5	0	24522	0	0	31559	93150	0	98088	0	0			bicyclogermacrene	0.0288713	0.00923379	22746.6	8549.5	0.0542928	0	0.0451451	0.0212552	0.00701019	0.0455246	50397	0	39998.7	6158.33	32662.5	7263.25	50397	0	119996	18475	65325	29053
a-muurolene	0.0210413	0.00735712	10249.7	3338.55	0.0168423	0.0444398	0.0407235	0.0180133	0.00622905	0	9762.33	22185	7303.67	17305.2	4942	0	29287	88740	21911	69221	9884	0			a-muurolene	0.027883	0.00845259	21078.4	7627.42	0.0505524	0	0.0415646	0.0409112	0.00564442	0.0286251	46925	0	36826.3	11853.3	26299	4567	46925	0	110479	35560	52598	18268
y-cadinene	0.0380223	0.014268	18884.5	6937.98	0.0251275	0.0920295	0.0665746	0.033662	0.0107401	0	14564.7	45942.5	11940	32338.8	8521	0	43694	183770	35820	129355	17042	0			y-cadinene	0.0546615	0.0167829	43146.8	15284.9	0.0971242	0.00824523	0.0955585	0.0786217	0.010225	0.0381944	90155	7546.5	84665	22779.3	47641	6093.75	90155	15093	253995	68338	95282	24375
d-cadinene	0.0767744	0.0281148	38260.5	13676.1	0.0571323	0.183148	0.131798	0.06641	0.0221584	0	33115.7	91430	23637.7	63799.5	17580	0	99347	365720	70913	255198	35160	0			d-cadinene	0.108858	0.0335804	85429.2	31463	0.198668	0.015494	0.195112	0.139488	0.0186773	0.085706	184413	14181	172870	40414.3	87023	13674	184413	28362	518609	121243	174046	54696
a-cadinene	0.012108	0.00358355	6700.36	2152.11	0.00907302	0.0272328	0.0126997	0.0121095	0	0.011533	5259	13595	2277.67	11633.5	0	7437	15777	54380	6833	46534	0	14874			a-cadinene	0.0182141	0.00623649	14725.8	5658.7	0.0348281	0	0.0329984	0.0269098	0.00370496	0.0108433	32329	0	29236.7	7796.67	17262.5	1730	32329	0	87710	23390	34525	6920
																																																	Other
Response ÷ d.w.	60951800	10900797	60951800	10900797	5.79631e+07	49921494	1.79348e+07	9.60691e+07	79337965	6.44844e+07	5.79631e+07	49921494	1.79348e+07	9.60691e+07	79337965	6.44844e+07									Response ÷ d.w.	130634505	68467706	130634505	68467706	92824489	91525615	8.86002e+07	2.89733e+07	465928894	1.59545e+07	92824489	91525615	8.86002e+07	2.89733e+07	465928894	1.59545e+07								Response ÷ d.w.
Fold diff. T-to-C ÷ d.w.	2.14		2.14
Fold diff. Rhiz.-to-Root ÷ d.w.	254		254																						Fold diff. Rhiz.-to-Root ÷ d.w.	574		574
					% Total Response						Peak Area per mg d.w.						d.w (mg)													% Total Response						Peak Area per mg d.w.						d.w (mg)
Stem	% Total Response		Peak Area per mg d.w.														3	2	3	3	1	1			Stem	% Total Response		Peak Area per mg d.w.														2	1	2	3	1	3
CM-584 - Control	Avg.	Std. Error	Avg.	Std. Error	1	2	3	4	5	6	1	2	3	4	5	6	1	2	3	4	5	6			CM-584 - Treamtent	Avg.	Std. Error	Avg.	Std. Error	1	2	3	4	5	6	1	2	3	4	5	6	1	2	3	4	5	6		Of Interest
a-thujene	0.0638032	0.0136586	174135	54528.9	0.047164	0.0403516	0.116928	0.0272396	0.0626468	0.088489	114588	169397	24221.3	79361	271853	385390	343765	338794	72664	238083	271853	385390			a-thujene	0.0744727	0.0119626	155027	45252.3	0.0744433	0.0687209	0.0764748	0.0236956	0.0920162	0.111485	174602	217558	84048	50178.3	337380	66393.7	349204	217558	168096	150535	337380	199181
a-pinene	0.152499	0.0367482	455358	178359	0.115996	0.0790381	0.231358	0.0378016	0.18192	0.268879	281822	331804	47925	110133	789433	1171029	845465	663607	143775	330399	789433	1171029			a-pinene	0.244894	0.0543646	467805	130295	0.168289	0.249139	0.345216	0.0390205	0.248688	0.419009	394711	788729	379402	82630.7	911821	249536	789422	788729	758805	247892	911821	748607
camphene	0.11036	0.0280245	343357	141669	0.071531	0.0624488	0.152559	0.0286022	0.132786	0.214235	173790	262162	31602	83331	576217	933042	521369	524323	94806	249993	576217	933042			camphene	0.17081	0.0369417	364782	127073	0.105963	0.211819	0.262663	0.0194835	0.223571	0.201359	248528	670582	288674	41258.7	819729	119917	497057	670582	577348	123776	819729	359751
sabinene	0.150382	0.024049	462441	146970	0.12787	0.108844	0.191048	0.0667955	0.184417	0.223317	310669	456930	39575	194605	800271	972599	932007	913859	118725	583815	800271	972599			sabinene	0.236744	0.0605023	421790	100308	0.128475	0.197559	0.442627	0.059171	0.208167	0.384465	301330	625437	486460	125302	763251	228964	602659	625437	972920	375905	763251	686891
1-octen-3-ol	0	0	0	0	0	0	0	0	0	0	0	0	0	0	0	0	0	0	0	0	0	0			1-octen-3-ol	0	0	0	0	0	0	0	0	0	0	0	0	0	0	0	0	0	0	0	0	0	0
B-pinene	0.236108	0.0497757	710351	258407	0.187991	0.136628	0.337302	0.0838129	0.268589	0.402325	456738	573566	69871	244184	1165529	1752217	1370213	1147131	209613	732553	1165529	1752217			B-pinene	0.344958	0.0831588	635864	170543	0.172056	0.331755	0.551567	0.0802983	0.335024	0.599047	403546	1050276	606188	170041	1228376	356755	807093	1050276	1212377	510124	1228376	1070266
3-octanone	0.00485458	0.00241372	18789.8	9925.1	0	0.0059353	0	0.00914495	0	0.0140472	0	24916.5	0	26643.3	0	61179	0	49833	0	79930	0	61179			3-octanone	0.00646154	0.0043723	21571.3	14233.4	0	0.0254051	0	0	0.0133641	0	0	80428	0	0	49000	0	0	80428	0	0	49000	0
myrcene	0.241506	0.0463845	756755	264393	0.182744	0.173189	0.305616	0.0821744	0.319343	0.385972	443990	727053	63307.3	239411	1385775	1680996	1331971	1454106	189922	718232	1385775	1680996			myrcene	0.300526	0.0738482	568908	165779	0.107254	0.33211	0.54294	0.0862229	0.291012	0.443615	251558	1051401	596706	182587	1067003	264189	503116	1051401	1193413	547762	1067003	792568
3-octanol	0.548223	0.0432877	1.69824e+06	434554	0.493896	0.612735	0.602829	0.402821	0.484294	0.692761	1.19996e+06	2.57227e+06	124874	1.1736e+06	2101575	3017135	3599869	5144549	374622	3520796	2101575	3017135			3-octanol	0.561905	0.111455	1.11967e+06	285516	0.233104	0.346331	0.770554	0.974966	0.501524	0.544954	546730	1096421	846860	2.06461e+06	1838851	324541	1093459	1096421	1693721	6193823	1838851	973623
a-phellandrene	0.0100292	0.00473995	33544.3	21137	0	0	0.0145871	0	0.0192165	0.0263717	0	0	3021.67	0	83389	114855	0	0	9065	0	83389	114855			a-phellandrene	0.0165197	0.00582448	31280.8	15221.7	0	0.0102151	0.0227496	0.00289067	0.028182	0.0350809	0	32339	25002.5	6121.33	103330	20892	0	32339	50005	18364	103330	62676
a-terpinene	0.045799	0.00841536	131280	41023.7	0.0298663	0.0358137	0.0743724	0.0255423	0.0406479	0.0685516	72562.3	150346	15406	74416	176390	298558	217687	300693	46218	223248	176390	298558			a-terpinene	0.0309251	0.00773515	72344.9	31903	0	0.040508	0.0294101	0.0219849	0.0557407	0.0379069	0	128241	32322.5	46555.7	204375	22575	0	128241	64645	139667	204375	67725
p-cymene	0.0529621	0.0114102	142796	42575	0.0335261	0.0342565	0.100896	0.0262251	0.058116	0.0647527	81454	143810	20900.3	76405.3	252192	282013	244362	287619	62701	229216	252192	282013			p-cymene	0.0372663	0.00996962	76078.4	31445.3	0.00185019	0.0356495	0.0506606	0.0150982	0.0585982	0.0617408	4339.5	112860	55677.5	31972.3	214852	36769	8679	112860	111355	95917	214852	110307		p-cymene
limonene	7.85772	1.53325	2.33202e+07	7.84351e+06	6.33948	5.32382	11.7665	2.3557	10.2844	11.0764	1.54022e+07	22349491	2.4374e+06	6.86322e+06	44628755	48240200	46206674	44698982	7312195	20589646	44628755	48240200			limonene	9.59594	2.67322	1.82933e+07	6.49268e+06	0.797879	12.2065	15.7033	2.61163	10.0355	16.2207	1.87137e+06	38643719	1.72584e+07	5530453	36795567	9.66005e+06	3742747	38643719	34516793	16591359	36795567	28980146		limonene
1,8-cineole	0	0	0	0	0	0	0	0	0	0	0	0	0	0	0	0	0	0	0	0	0	0			1,8-cineole	0	0	0	0	0	0	0	0	0	0	0	0	0	0	0	0	0	0	0	0	0	0
y-terpinene	0.0765369	0.0109645	234436	71441.2	0.0551318	0.0670568	0.0979354	0.0480703	0.0723821	0.118645	133947	281506	20287	140050	314099	516725	401840	563012	60861	420151	314099	516725			y-terpinene	0.0525049	0.0135928	126643	56219.6	0.00142873	0.0772277	0.0367151	0.0404956	0.0947984	0.0643637	3351	244489	40351	85754.3	347581	38331	6702	244489	80702	257263	347581	114993		y-terpinene
trans-sabinene hydrate	0.0131828	0.00318834	46069.5	10879.3	0.0187825	0.0194794	0	0.0198791	0.01107	0.00988558	45633.3	81775	0	57916.7	48038	43054	136900	163550	0	173750	48038	43054			trans-sabinene hydrate	0.00992224	0.00541052	17351.8	6418.46	0	0.00475296	0.0346292	0.0147718	0.00537948	0	0	15047	38058.5	31281	19724	0	0	15047	76117	93843	19724	0
terpinolene	0.0636854	0.0087537	191055	55540	0.0529022	0.0539726	0.0861161	0.0341681	0.0645655	0.0903879	128530	226578	17838.7	99547	280179	393660	385589	453156	53516	298641	280179	393660			terpinolene	0.052314	0.0125911	112000	43855.7	0.00276047	0.0715553	0.0724321	0.0242136	0.072615	0.0703073	6474.5	226531	79605	51275.3	266245	41870.7	12949	226531	159210	153826	266245	125612
linalool	0	0	0	0	0	0	0	0	0	0	0	0	0	0	0	0	0	0	0	0	0	0			linalool	0	0	0	0	0	0	0	0	0	0	0	0	0	0	0	0	0	0	0	0	0	0
camphor	0.126774	0.0219207	402975	116915	0.187374	0.108613	0.0972741	0.0777799	0.0878239	0.201778	455238	455959	20150	226608	381108	878789	1365713	911918	60450	679823	381108	878789			camphor	0.483759	0.208977	1.11126e+06	644881	0	1.2728	0.214418	0.0239919	0.495941	0.895404	0	4029455	235651	50805.7	1818382	533247	0	4029455	471302	152417	1818382	1599742		camphor
menthone	0.00150925	0.00150925	6549.33	6549.33	0	0	0	0	0.00905551	0	0	0	0	0	39296	0	0	0	0	0	39296	0			menthone	0	0	0	0	0	0	0	0	0	0	0	0	0	0	0	0	0	0	0	0	0	0
pinocarvone	0.00481715	0.00100261	16648.7	5512.32	0.00481237	0.00427177	0.00230272	0.00446665	0.00355966	0.00948974	11692	17933	477	13013.3	15447	41330	35076	35866	1431	39040	15447	41330			pinocarvone	0.00569159	0.00141877	12967.1	5360.63	0	0.00795497	0.00826321	0.00340854	0.00901016	0.00551266	0	25184	9081.5	7218	33036	3283	0	25184	18163	21654	33036	9849
menthofuran	0	0	0	0	0	0	0	0	0	0	0	0	0	0	0	0	0	0	0	0	0	0			menthofuran	0	0	0	0	0	0	0	0	0	0	0	0	0	0	0	0	0	0	0	0	0	0
isomenthone	0.00291761	0.00203224	12532.2	8787.58	0	0.00545507	0	0	0.0120506	0	0	22900.5	0	0	52293	0	0	45801	0	0	52293	0			isomenthone	0	0	0	0	0	0	0	0	0	0	0	0	0	0	0	0	0	0	0	0	0	0
neomenthol	0	0	0	0	0	0	0	0	0	0	0	0	0	0	0	0	0	0	0	0	0	0			neomenthol	0	0	0	0	0	0	0	0	0	0	0	0	0	0	0	0	0	0	0	0	0	0
d-terpineol	0.00232832	0.000411418	8287.64	2183.54	0.00216856	0.00197486	0.000608265	0.00280996	0.00352256	0.00288573	5268.67	8290.5	126	8186.67	15286	12568	15806	16581	378	24560	15286	12568			d-terpineol	0.00208295	0.000660894	5283.39	2268.2	0.00239636	0.00140785	0.00343258	0.00092903	0.00433189	0	5620.5	4457	3772.5	1967.33	15883	0	11241	4457	7545	5902	15883	0
borneol	3.97062	0.50058	1.37932e+07	3.30033e+06	3.86267	4.52803	1.57614	4.32683	4.57466	4.95538	9384626	19008753	326492	1.2606e+07	19851522	21581833	28153878	38017506	979476	37818005	19851522	21581833			borneol	2.55754	0.703012	6.32184e+06	2.73342e+06	3.72902	1.1869	3.18236	1.21625	5.1328	0.897914	8.74619e+06	3757508	3497502	2575565	18819553	534742	17492373	3757508	6995004	7726695	18819553	1604225		borneol
trans-isopulegone	0.0171209	0.000909648	54154.7	13275.8	0.0137171	0.018756	0.0170185	0.0154123	0.0181272	0.0196942	33326.7	78738	3525.33	44903	78662	85773	99980	157476	10576	134709	78662	85773			trans-isopulegone	0.0109361	0.00281341	22770.5	8978.7	0	0.00972955	0.0188799	0.00723705	0.0169381	0.0128321	0	30802	20749.5	15325.3	62104	7642	0	30802	41499	45976	62104	22926
menthol	0	0	0	0	0	0	0	0	0	0	0	0	0	0	0	0	0	0	0	0	0	0			menthol	0	0	0	0	0	0	0	0	0	0	0	0	0	0	0	0	0	0	0	0	0	0
terpinen-4-ol	0.0996418	0.0107156	333796	90395.6	0.0735732	0.113936	0.0742147	0.0915216	0.102038	0.142567	178751	478306	15373.3	266643	442790	620914	536254	956612	46120	799930	442790	620914			terpinen-4-ol	0.0594312	0.0151196	143886	67260.5	0.0393955	0.0275752	0.0685674	0.0518258	0.129514	0.0397098	92399.5	87298	75357.5	109747	474866	23648.7	184799	87298	150715	329242	474866	70946		terpinen-4-ol
cis-isopulegone	0	0	0	0	0	0	0	0	0	0	0	0	0	0	0	0	0	0	0	0	0	0			cis-isopulegone	0	0	0	0	0	0	0	0	0	0	0	0	0	0	0	0	0	0	0	0	0	0
isomenthol	0	0	0	0	0	0	0	0	0	0	0	0	0	0	0	0	0	0	0	0	0	0			isomenthol	0	0	0	0	0	0	0	0	0	0	0	0	0	0	0	0	0	0	0	0	0	0
neoisomenthol	0	0	0	0	0	0	0	0	0	0	0	0	0	0	0	0	0	0	0	0	0	0			neoisomenthol	0	0	0	0	0	0	0	0	0	0	0	0	0	0	0	0	0	0	0	0	0	0
a-terpineol	0	0	0	0	0	0	0	0	0	0	0	0	0	0	0	0	0	0	0	0	0	0			a-terpineol	0	0	0	0	0	0	0	0	0	0	0	0	0	0	0	0	0	0	0	0	0	0
myrtenal	0.0877816	0.0110823	293911	83711.9	0.0791145	0.120164	0.0695691	0.0477552	0.10898	0.101106	192214	504452	14411	139132	472916	440340	576643	1008904	43233	417397	472916	440340			myrtenal	0.0639724	0.0156794	146976	52435.1	0	0.0717893	0.0868854	0.100221	0.0887204	0.0362182	0	227272	95489.5	212231	325296	21569.3	0	227272	190979	636692	325296	64708
cis-dihydrocarvone	1.08824	0.196049	3.58447e+06	848593	1.00129	0.927129	0.497684	1.92669	0.904241	1.27242	2.43271e+06	3892106	103094	5.61332e+06	3923916	5541682	7298131	7784212	309281	16839953	3923916	5541682			cis-dihydrocarvone	1.43878	0.436122	3.53374e+06	1.32878e+06	3.17489	2.34531	0.676102	0.587339	1.05605	0.792962	7.44651e+06	7424830	743056	1243761	3872042	472239	14893021	7424830	1486112	3731283	3872042	1416717		cis-dihydrocarvone
trans-dihydrocarvone	0.0977806	0.0215863	314025	76988.3	0.0953549	0.0780584	0.0448024	0.199651	0.0890107	0.0798068	231672	327691	9280.67	581671	386258	347577	695015	655382	27842	1745014	386258	347577			trans-dihydrocarvone	0.113807	0.0305264	266114	92038.8	0.251733	0.137245	0.0559858	0.0480668	0.0961934	0.0936179	590424	434493	61530	101787	352696	55753	1180847	434493	123060	305362	352696	167259
trans-carveol	3.06271	0.600306	1.06372e+07	2.58259e+06	2.78576	3.02613	0.727929	5.05256	4.13541	2.64847	6.76821e+06	12703743	150788	14720364	17945443	11534716	20304626	25407486	452364	44161092	17945443	11534716			trans-carveol	0.898671	0.333687	2.26594e+06	1.327e+06	0.607406	0.135223	1.19913	0.646984	2.40492	0.39836	1424631	428093	1317883	1370068	8817702	237239	2849262	428093	2635766	4110204	8817702	711716
cis-carveol	0.12098	0.0159279	392681	88912.4	0.0999679	0.130502	0.075848	0.191315	0.11478	0.113467	242879	547851	15711.7	557386	498083	494176	728638	1095702	47135	1672157	498083	494176			cis-carveol	0.137112	0.0688867	314104	169813	0.475231	0.0186994	0.0817395	0.0841332	0.112606	0.050266	1114623	59199	89834	178162	412872	29935.3	2229246	59199	179668	534487	412872	89806
pulegone	0	0	0	0	0	0	0	0	0	0	0	0	0	0	0	0	0	0	0	0	0	0			pulegone	0	0	0	0	0	0	0	0	0	0	0	0	0	0	0	0	0	0	0	0	0	0
carvone	80.4177	1.31604	2.44962e+08	5.14851e+07	82.6733	82.7526	81.7029	82.7566	76.8371	75.7834	2.00861e+08	347397110	1.69245e+07	241106812	333431244	330054270	602582707	694794220	50773474	723320436	333431244	330054270			carvone	81.5889	2.89776	1.78059e+08	3.87379e+07	88.7906	80.0928	74.2635	91.8934	77.6039	76.8895	2.08253e+08	253559142	81617685	1.94595e+08	284536786	45790645	416505069	253559142	163235370	583786177	284536786	137371935		carvone
cis-piperitone oxide	0	0	0	0	0	0	0	0	0	0	0	0	0	0	0	0	0	0	0	0	0	0			cis-piperitone oxide	0	0	0	0	0	0	0	0	0	0	0	0	0	0	0	0	0	0	0	0	0	0
piperitone	0.544017	0.047308	1.69688e+06	387183	0.646209	0.704926	0.454662	0.545998	0.395415	0.516894	1.57001e+06	2.95929e+06	94181.7	1590735	1715887	2251191	4710035	5918587	282545	4772205	1715887	2251191			piperitone	0.513227	0.0961334	1.1127e+06	272176	0.811757	0.384697	0.466469	0.802918	0.31784	0.295682	1.90392e+06	1217880	512662	1.70028e+06	1165370	176090	3807847	1217880	1025325	5100826	1165370	528270
trans-piperitone oxide	0	0	0	0	0	0	0	0	0	0	0	0	0	0	0	0	0	0	0	0	0	0			trans-piperitone oxide	0	0	0	0	0	0	0	0	0	0	0	0	0	0	0	0	0	0	0	0	0	0
isopiperitenone	0.0196046	0.0052332	67783.9	16088.4	0.0240425	0.0165243	0	0.0390757	0.0227473	0.015238	58413	69369.5	0	113845	98711	66365	175239	138739	0	341535	98711	66365			isopiperitenone	0.0142797	0.00322663	28087.2	9142.07	0	0.0147763	0.0187334	0.012307	0.0167226	0.0231387	0	46779	20588.5	26061.7	61314	13780	0	46779	41177	78185	61314	41340
neo-menthyl acetate	0	0	0	0	0	0	0	0	0	0	0	0	0	0	0	0	0	0	0	0	0	0			neo-menthyl acetate	0	0	0	0	0	0	0	0	0	0	0	0	0	0	0	0	0	0	0	0	0	0
bornyl acetate	0.0547004	0.00864754	188531	55316.2	0.0367376	0.0850511	0.0328624	0.0534579	0.0448157	0.0752775	89256.7	357046	6807.33	155747	194476	327851	267770	714093	20422	467240	194476	327851			bornyl acetate	0.0271724	0.01035	70805.5	35522.1	0	0.0260299	0.0462677	0.0265422	0.0641945	0	0	82406	50849.5	56206.3	235371	0	0	82406	101699	168619	235371	0
menthyl acetate	0	0	0	0	0	0	0	0	0	0	0	0	0	0	0	0	0	0	0	0	0	0			menthyl acetate	0	0	0	0	0	0	0	0	0	0	0	0	0	0	0	0	0	0	0	0	0	0
carvacrol	0.0553817	0.0178754	114627	27900.5	0.0476303	0.0455965	0.135662	0.0676061	0.0214693	0.0143258	115721	191415	28102	196967	93165	62392	347164	382830	84306	590900	93165	62392			carvacrol	0.0375759	0.0116032	74353	26205.5	0.0123696	0.00790759	0.065986	0.0765211	0.0391359	0.023535	29012	25034	72520.5	162043	143493	14016	58024	25034	145041	486128	143493	42048
piperitenone	0.0164204	0.00610818	53022.7	16372.4	0.0250006	0.0115951	0	0.0421772	0.0112288	0.00852102	60740.7	48676.5	0	122881	48727	37111	182222	97353	0	368643	48727	37111			piperitenone	0.012638	0.00914904	28028.1	19194.5	0.00637046	0.00366382	0.0036878	0.0581941	0.0039116	0	14941.5	11599	4053	123233	14342	0	29883	11599	8106	369699	14342	0
piperitenone oxide	0	0	0	0	0	0	0	0	0	0	0	0	0	0	0	0	0	0	0	0	0	0			piperitenone oxide	0	0	0	0	0	0	0	0	0	0	0	0	0	0	0	0	0	0	0	0	0	0
B-caryophyllene	0.00254427	0.00121075	7963.97	3805.94	0.00417741	0.00414898	0	0.0069392	0	0	10149.3	17417.5	0	20217	0	0	30448	34835	0	60651	0	0			B-caryophyllene	0	0	0	0	0	0	0	0	0	0	0	0	0	0	0	0	0	0	0	0	0	0
(E)-B-farnesene	0.00993555	0.00620373	29993.1	18132.8	0.0112828	0.00913764	0	0.0391929	0	0	27412.3	38360	0	114186	0	0	82237	76720	0	342559	0	0			(E)-B-farnesene	0.00205157	0.00205157	4344.44	4344.44	0	0	0	0.0123094	0	0	0	0	0	26066.7	0	0	0	0	0	78200	0	0
a-humulene	0	0	0	0	0	0	0	0	0	0	0	0	0	0	0	0	0	0	0	0	0	0			a-humulene	0	0	0	0	0	0	0	0	0	0	0	0	0	0	0	0	0	0	0	0	0	0
y-muurolene	0.0581319	0.0105476	161934	39085.2	0.0553	0.051702	0.0680661	0.103989	0.0363078	0.0334267	134355	217046	14099.7	302966	157556	145581	403066	434092	42299	908898	157556	145581			y-muurolene	0.0307792	0.00626618	54351.9	11000.9	0.0357194	0.00647605	0.0492335	0.03513	0.0191211	0.038995	83777.5	20502	54109	74392	70108	23223	167555	20502	108218	223176	70108	69669
germacrene D	0.257888	0.0923276	787835	283597	0.278673	0.265799	0.106071	0.687846	0.115654	0.0932844	677055	1.11583e+06	21972.3	2.004e+06	501875	406275	2031166	2231663	65917	6012005	501875	406275			germacrene D	0.156986	0.0479993	265635	79756.9	0.245268	0.0173778	0.332297	0.151017	0.0526973	0.143261	575260	55015	365204	319796	193216	85317.3	1150520	55015	730407	959389	193216	255952
bicyclogermacrene	0.0294104	0.0126985	93931.8	35515.7	0.0395028	0.0269757	0	0.0862858	0.0144184	0.00927942	95975	113244	0	251389	62568	40414	287925	226489	0	754167	62568	40414			bicyclogermacrene	0.0144626	0.00684906	17353.2	7756.72	0	0	0.0400158	0.0174356	0.00187398	0.0274502	0	0	43978.5	36922	6871	16347.7	0	0	87957	110766	6871	49043
a-muurolene	0.0258065	0.00425211	69431.9	15336.3	0.0196198	0.021962	0.0382837	0.0398543	0.0171588	0.0179607	47667.7	92197	7930.33	116113	74460	78223	143003	184394	23791	348340	74460	78223			a-muurolene	0.0124337	0.00303009	20218.6	3125.96	0.00927738	0.00303681	0.0218238	0.013407	0.00698426	0.0200732	21759.5	9614	23985	28391	25608	11954.3	43519	9614	47970	85173	25608	35863
y-cadinene	0.0567155	0.0109756	164288	41191.4	0.0523231	0.0516012	0.0554502	0.108804	0.036155	0.0359588	127123	216623	11486.3	316996	156893	156609	381368	433246	34459	950988	156893	156609			y-cadinene	0.0232155	0.00713344	38346.8	11779.9	0.00260058	0.00418091	0.0445334	0.0343538	0.0185993	0.0350249	6099.5	13236	48943.5	72748.3	68195	20858.7	12199	13236	97887	218245	68195	62576
d-cadinene	0.12371	0.0177244	364472	82590.8	0.107849	0.120778	0.125153	0.207164	0.0880944	0.0932238	262027	507028	25925	603561	382282	406011	786080	1014055	77775	1810682	382282	406011			d-cadinene	0.0494385	0.0146322	81950.1	22577.6	0.00493064	0.0151601	0.0939698	0.0708059	0.0365897	0.0751752	11564.5	47994	103276	149940	134157	44769.7	23129	47994	206551	449820	134157	134309
a-cadinene	0.0172087	0.00288093	48824.3	11382	0.0156299	0.0150467	0.0193937	0.0302714	0.0117812	0.0111291	37974	63166.5	4017.33	88194	51124	48470	113922	126333	12052	264582	51124	48470			a-cadinene	0.00886648	0.0021817	15387.4	4159.54	0.00757066	0	0.0157903	0.0113273	0.00723	0.0112806	17756.5	0	17354	23987	26509	6718	35513	0	34708	71961	26509	20154
																																																	Other
Response ÷ d.w.	307381258	66247692	307381258	66247692	2.42957e+08	4.19802e+08	2.07147e+07	2.91345e+08	433945683	435523113	2.42957e+08	4.19802e+08	2.07147e+07	2.91345e+08	433945683	435523113									Response ÷ d.w.	216499509	47925405	216499509	47925405	234543567	316581850	109902868	2.11762e+08	366652857	5.95538e+07	234543567	316581850	109902868	2.11762e+08	366652857	5.95538e+07								Response ÷ d.w.
Fold diff. T-to-C ÷ d.w.	0.7		0.7
Fold diff. S-to-Root ÷ d.w.	1280		1280																						Fold diff. S-to-Root ÷ d.w.	951		951
Fold diff. S-to-Rhiz. ÷ d.w.	5		5																						Fold diff. S-to-Rhiz. ÷ d.w.	1.66		1.66
[truncated: 33 more columns]

## Sheet: Mann Table
Real Statistics Using Excel
Mann-Whitney Table
Updated
2022-12-28
Copyright © 2013 - 2022 Charles Zaiontz
Mann-Whitney Table				0.05		two tailed
n1\n2	2	3	4	5	6	7	8	9	10	11	12	13	14	15	16	17	18	19	20
2							0	0	0	0	1	1	1	1	1	2	2	2	2
3				0	1	1	2	2	3	3	4	4	5	5	6	6	7	7	8
4			0	1	2	3	4	4	5	6	7	8	9	10	11	11	12	13	14
5		0	1	2	3	5	6	7	8	9	11	12	13	14	15	17	18	19	20
6		1	2	3	5	6	7	10	11	13	14	16	17	19	21	22	24	25	27
7		1	3	5	6	8	10	12	14	16	18	20	22	24	26	28	30	32	34
8	0	2	4	6	7	10	13	15	17	19	22	24	26	29	31	34	36	38	41
9	0	2	4	7	10	12	15	17	20	23	26	28	31	34	37	39	42	45	48
10	0	3	5	8	11	14	17	20	23	26	29	33	36	39	42	45	48	52	55
11	0	3	6	9	13	16	19	23	26	30	33	37	40	44	47	51	55	58	62
12	1	4	7	11	14	18	22	26	29	33	37	41	45	49	53	57	61	65	69
13	1	4	8	12	16	20	24	28	33	37	41	45	50	54	59	63	67	72	76
14	1	5	9	13	17	22	26	31	36	40	45	50	55	59	64	67	74	78	83
15	1	5	10	14	19	24	29	34	39	44	49	54	59	64	70	75	80	85	90
16	1	6	11	15	21	26	31	37	42	47	53	59	64	70	75	81	86	92	98
17	2	6	11	17	22	28	34	39	45	51	57	63	67	75	81	87	93	99	105
18	2	7	12	18	24	30	36	42	48	55	61	67	74	80	86	93	99	106	112
19	2	7	13	19	25	32	38	45	52	58	65	72	78	85	92	99	106	113	119
20	2	8	13	20	27	34	41	48	55	62	69	76	83	90	98	105	112	119	127
21	3	8	15	22	29	36	43	50	58	65	73	80	88	96	103	111	119	126	134
22	3	9	16	23	30	38	45	53	61	69	77	85	93	101	109	117	125	133	141
23	3	9	17	24	32	40	48	56	64	73	81	89	98	106	115	123	132	140	149
24	3	10	17	25	33	42	50	59	67	76	85	94	102	111	120	129	138	147	156
25	3	10	18	27	35	44	53	62	71	80	89	98	107	117	126	135	145	154	163
26	4	11	19	28	37	46	55	64	74	83	93	102	112	122	132	141	151	161	171
27	4	11	20	29	38	48	57	67	77	87	97	107	117	127	137	147	158	168	178
28	4	12	21	30	40	50	60	70	80	90	101	111	122	132	143	154	164	175	186
29	4	13	22	32	42	52	62	73	83	94	105	116	127	138	149	160	171	182	193
30	5	13	23	33	43	54	65	76	87	98	109	120	131	143	154	166	177	189	200
31	5	14	24	34	45	56	67	78	90	101	113	125	136	148	160	172	184	196	208
32	5	14	24	35	46	58	69	81	93	105	117	129	141	153	166	178	190	203	215
33	5	15	25	37	48	60	72	84	96	108	121	133	146	159	171	184	197	210	222
34	5	15	26	38	50	62	74	87	99	112	125	138	151	164	177	190	203	217	230
35	6	16	27	39	51	64	77	89	103	116	129	142	156	169	183	196	210	224	237
36	6	16	28	40	53	66	79	92	106	119	133	147	161	174	188	202	216	231	245
37	6	17	29	41	55	68	81	95	109	123	137	151	165	180	194	209	223	238	252
38	6	17	30	43	56	70	84	98	112	127	141	156	170	185	200	215	230	245	259
39	7	18	31	44	58	72	86	101	115	130	145	160	175	190	206	221	236	252	267
40	7	18	31	45	59	74	89	103	119	134	149	165	180	196	211	227	243	258	274
Critical values for U with alpha = .05, two-tailed
Mann-Whitney Table				0.01		two tailed
n1\n2	2	3	4	5	6	7	8	9	10	11	12	13	14	15	16	17	18	19	20
2																		0	0
3								0	0	0	1	1	1	2	2	2	2	3	3
4					0	0	1	1	2	2	3	3	4	5	5	6	6	7	8
5				0	1	1	2	3	4	5	6	7	7	8	9	10	11	12	13
6			0	1	2	3	4	5	6	7	9	10	11	12	13	15	16	17	18
7			0	1	3	4	6	7	9	10	12	13	15	16	18	19	21	22	24
8			1	2	4	6	7	9	11	13	15	17	18	20	22	24	26	28	30
9		0	1	3	5	7	9	11	13	16	18	20	22	24	27	29	31	33	36
10		0	2	4	6	9	11	13	16	18	21	24	26	29	31	34	37	39	42
11		0	2	5	7	10	13	16	18	21	24	27	30	33	36	39	42	45	46
12		1	3	6	9	12	15	18	21	24	27	31	34	37	41	44	47	51	54
13		1	3	7	10	13	17	20	24	27	31	34	38	42	45	49	53	56	60
14		1	4	7	11	15	18	22	26	30	34	38	42	46	50	54	58	63	67
15		2	5	8	12	16	20	24	29	33	37	42	46	51	55	60	64	69	73
16		2	5	9	13	18	22	27	31	36	41	45	50	55	60	65	70	74	79
17		2	6	10	15	19	24	29	34	39	44	49	54	60	65	70	75	81	86
18		2	6	11	16	21	26	31	37	42	47	53	58	64	70	75	81	87	92
19	0	3	7	12	17	22	28	33	39	45	51	56	63	69	74	81	87	93	99
20	0	3	8	13	18	24	30	36	42	46	54	60	67	73	79	86	92	99	105
Critical values for U with alpha = .01, two-tailed

## Sheet: z-Table
z	0	0.01	0.02	0.03	0.04	0.05	0.06	0.07	0.08	0.09		https://www.z-table.com/
-3.4	0.0003	0.0003	0.0003	0.0003	0.0003	0.0003	0.0003	0.0003	0.0003	0.0002
-3.3	0.0005	0.0005	0.0005	0.0004	0.0004	0.0004	0.0004	0.0004	0.0004	0.0003
-3.2	0.0007	0.0007	0.0006	0.0006	0.0006	0.0006	0.0006	0.0005	0.0005	0.0005
-3.1	0.001	0.0009	0.0009	0.0009	0.0008	0.0008	0.0008	0.0008	0.0007	0.0007
-3	0.0013	0.0013	0.0013	0.0012	0.0012	0.0011	0.0011	0.0011	0.001	0.001
-2.9	0.0019	0.0018	0.0018	0.0017	0.0016	0.0016	0.0015	0.0015	0.0014	0.0014
-2.8	0.0026	0.0025	0.0024	0.0023	0.0023	0.0022	0.0021	0.0021	0.002	0.0019
-2.7	0.0035	0.0034	0.0033	0.0032	0.0031	0.003	0.0029	0.0028	0.0027	0.0026
-2.6	0.0047	0.0045	0.0044	0.0043	0.0041	0.004	0.0039	0.0038	0.0037	0.0036
-2.5	0.0062	0.006	0.0059	0.0057	0.0055	0.0054	0.0052	0.0051	0.0049	0.0048
-2.4	0.0082	0.008	0.0078	0.0075	0.0073	0.0071	0.0069	0.0068	0.0066	0.0064
-2.3	0.0107	0.0104	0.0102	0.0099	0.0096	0.0094	0.0091	0.0089	0.0087	0.0084
-2.2	0.0139	0.0136	0.0132	0.0129	0.0125	0.0122	0.0119	0.0116	0.0113	0.011
-2.1	0.0179	0.0174	0.017	0.0166	0.0162	0.0158	0.0154	0.015	0.0146	0.0143
-2	0.0228	0.0222	0.0217	0.0212	0.0207	0.0202	0.0197	0.0192	0.0188	0.0183
-1.9	0.0287	0.0281	0.0274	0.0268	0.0262	0.0256	0.025	0.0244	0.0239	0.0233
-1.8	0.0359	0.0351	0.0344	0.0336	0.0329	0.0322	0.0314	0.0307	0.0301	0.0294
-1.7	0.0446	0.0436	0.0427	0.0418	0.0409	0.0401	0.0392	0.0384	0.0375	0.0367
-1.6	0.0548	0.0537	0.0526	0.0516	0.0505	0.0495	0.0485	0.0475	0.0465	0.0455
-1.5	0.0668	0.0655	0.0643	0.063	0.0618	0.0606	0.0594	0.0582	0.0571	0.0559
-1.4	0.0808	0.0793	0.0778	0.0764	0.0749	0.0735	0.0721	0.0708	0.0694	0.0681
-1.3	0.0968	0.0951	0.0934	0.0918	0.0901	0.0885	0.0869	0.0853	0.0838	0.0823
-1.2	0.1151	0.1131	0.1112	0.1093	0.1075	0.1056	0.1038	0.102	0.1003	0.0985
-0.1	0.1357	0.1335	0.1314	0.1292	0.1271	0.1251	0.123	0.121	0.119	0.117
-1	0.1587	0.1562	0.1539	0.1515	0.1492	0.1469	0.1446	0.1423	0.1401	0.1379
'..-0.9	0.1841	0.1814	0.1788	0.1762	0.1736	0.1711	0.1685	0.166	0.1635	0.1611
-0.8	0.2119	0.209	0.2061	0.2033	0.2005	0.1977	0.1949	0.1922	0.1894	0.1867
-0.7	0.242	0.2389	0.2358	0.2327	0.2296	0.2266	0.2236	0.2206	0.2177	0.2148
-0.6	0.2743	0.2709	0.2676	0.2643	0.2611	0.2578	0.2546	0.2514	0.2483	0.2451
'..-0.5	0.3085	0.305	0.3015	0.2981	0.2946	0.2912	0.2877	0.2843	0.281	0.2776
-0.4	0.3446	0.3409	0.3372	0.3336	0.33	0.3264	0.3228	0.3192	0.3156	0.3121
0.3	0.3821	0.3783	0.3745	0.3707	0.3669	0.3632	0.3594	0.3557	0.352	0.3483
-0.2	0.4207	0.4168	0.4129	0.409	0.4052	0.4013	0.3974	0.3936	0.3897	0.3859
'..-0.1	0.4602	0.4562	0.4522	0.4483	0.4443	0.4404	0.4364	0.4325	0.4286	0.4247
0	0.5	0.496	0.492	0.488	0.484	0.4801	0.4761	0.4721	0.4681	0.4641
z	0	0.01	0.02	0.03	0.04	0.05	0.06	0.07	0.08	0.09
0	0.5	0.504	0.508	0.512	0.516	0.5199	0.5239	0.5279	0.5319	0.5359
0.1	0.5398	0.5438	0.5478	0.5517	0.5557	0.5596	0.5636	0.5675	0.5714	0.5753
0.2	0.5793	0.5832	0.5871	0.591	0.5948	0.5987	0.6026	0.6064	0.6103	0.6141
0.3	0.6179	0.6217	0.6255	0.6293	0.6331	0.6368	0.6406	0.6443	0.648	0.6517
0.4	0.6554	0.6591	0.6628	0.6664	0.67	0.6736	0.6772	0.6808	0.6844	0.6879
0.5	0.6915	0.695	0.6985	0.7019	0.7054	0.7088	0.7123	0.7157	0.719	0.7224
0.6	0.7257	0.7291	0.7324	0.7357	0.7389	0.7422	0.7454	0.7486	0.7517	0.7549
0.7	0.758	0.7611	0.7642	0.7673	0.7704	0.7734	0.7764	0.7794	0.7823	0.7852
0.8	0.7881	0.791	0.7939	0.7967	0.7995	0.8023	0.8051	0.8078	0.8106	0.8133
0.9	0.8159	0.8186	0.8212	0.8238	0.8264	0.8289	0.8315	0.834	0.8365	0.8389
1	0.8413	0.8438	0.8461	0.8485	0.8508	0.8531	0.8554	0.8577	0.8599	0.8621
1.1	0.8643	0.8665	0.8686	0.8708	0.8729	0.8749	0.877	0.879	0.881	0.883
1.2	0.8849	0.8869	0.8888	0.8907	0.8925	0.8944	0.8962	0.898	0.8997	0.9015
1.3	0.9032	0.9049	0.9066	0.9082	0.9099	0.9115	0.9131	0.9147	0.9162	0.9177
1.4	0.9192	0.9207	0.9222	0.9236	0.9251	0.9265	0.9279	0.9292	0.9306	0.9319
1.5	0.9332	0.9345	0.9357	0.937	0.9382	0.9394	0.9406	0.9418	0.9429	0.9441
1.6	0.9452	0.9463	0.9474	0.9484	0.9495	0.9505	0.9515	0.9525	0.9535	0.9545
1.7	0.9554	0.9564	0.9573	0.9582	0.9591	0.9599	0.9608	0.9616	0.9625	0.9633
1.8	0.9641	0.9649	0.9656	0.9664	0.9671	0.9678	0.9686	0.9693	0.9699	0.9706
1.9	0.9713	0.9719	0.9726	0.9732	0.9738	0.9744	0.975	0.9756	0.9761	0.9767
2	0.9772	0.9778	0.9783	0.9788	0.9793	0.9798	0.9803	0.9808	0.9812	0.9817
2.1	0.9821	0.9826	0.983	0.9834	0.9838	0.9842	0.9846	0.985	0.9854	0.9857
2.2	0.9861	0.9864	0.9868	0.9871	0.9875	0.9878	0.9881	0.9884	0.9887	0.989
2.3	0.9893	0.9896	0.9898	0.9901	0.9904	0.9906	0.9909	0.9911	0.9913	0.9916
2.4	0.9918	0.992	0.9922	0.9925	0.9927	0.9929	0.9931	0.9932	0.9934	0.9936
2.5	0.9938	0.994	0.9941	0.9943	0.9945	0.9946	0.9948	0.9949	0.9951	0.9952
2.6	0.9953	0.9955	0.9956	0.9957	0.9959	0.996	0.9961	0.9962	0.9963	0.9964
2.7	0.9965	0.9966	0.9967	0.9968	0.9969	0.997	0.9971	0.9972	0.9973	0.9974
2.8	0.9974	0.9975	0.9976	0.9977	0.9977	0.9978	0.9979	0.9979	0.998	0.9981
2.9	0.9981	0.9982	0.9982	0.9983	0.9984	0.9984	0.9985	0.9985	0.9986	0.9986
3	0.9987	0.9987	0.9987	0.9988	0.9988	0.9989	0.9989	0.9989	0.999	0.999
3.1	0.999	0.9991	0.9991	0.9991	0.9992	0.9992	0.9992	0.9992	0.9993	0.9993
3.2	0.9993	0.9993	0.9994	0.9994	0.9994	0.9994	0.9994	0.9995	0.9995	0.9995
3.3	0.9995	0.9995	0.9995	0.9996	0.9996	0.9996	0.9996	0.9996	0.9996	0.9997
3.4	0.9997	0.9997	0.9997	0.9997	0.9997	0.9997	0.9997	0.9997	0.9997	0.9998
